# Supplementary material for: An extended model for culture-dependent heterogenous gene expression and proliferation dynamics in mouse embryonic stem cells
Source: NPJ Syst Biol Appl. 2017 Aug 3;3:19. doi: 10.1038/s41540-017-0020-5 (PMC5543144; doi:10.1038/s41540-017-0020-5)
Supplement: Supplementary file 1 — Supplemental Material [file 41540_2017_20_MOESM1_ESM.xlsx]

## Sheet: DE genes, Marks et al 2012
2i>Serum	Serum>2i
Symbol	Symbol
Npc2	Adamts15
Acox3	Spesp1
Rgs9	Serpine2
Sfxn4	Slmo1
Myh7b	Mall
Mt1	Sgk2
Mosc2	LOC630607
Caprin2	H2-Q7
Tctex1d2	Pcsk1
Dennd4b	Ghr
Tmem82	Foxa3
BC025920	2310007B03Rik
Commd4	Tcte2
Aim2	Limd2
Apobec2	Pcdh17
Nek5	Irf5
Ift52	Hdgfrp3
Pigh	Cyr61
Zmym6	Tacstd2
Cox6b2	St6gal1
Dnajc4	Ecscr
Eif4a2	Dlx3
Tmem146	Hspa1b
2510002D24Rik	Tmprss11d
Lima1	Psmb8
2900005J15Rik	Ret
Slc12a8	Col5a3
Tmem136	Zfp248
1700008O03Rik	2810004N23Rik
Mettl10	Tagln
Epb4.1l4b	Bbc3
Catsper2	Ism1
Art5	3110003A17Rik
Mir16-1	Cpe
Cd37	1700003E16Rik
Slc17a9	Usp17l5
Arhgap17	Hist2h4
Rag1ap1	Fhl3
Chkb	Stard3nl
Tmem39a	Tm6sf1
Chst8	Shisa4
Ilvbl	Aven
Ostm1	Rbms1
Zfp273	Eif4e3
Tmem8b	Sycp1-ps1
5033406O09Rik	Jph1
Fetub	Endod1
Ppic	9230110C19Rik
Ppip5k1	Kcnk2
Rft1	Abi2
Plekhh1	Kcng3
Ildr1	Cftr
Map4k1	Emp3
C030044B11Rik	Rab25
Amt	Spred3
Thpo	Scn9a
Slc6a7	Ptger4
Galt	Tmem132d
Cbr3	Tubb2a
Lin52	Vgf
Cstb	Slc10a1
Dhrs11	Cdcp1
Gm6792	Dusp2
Ly6g6d	Edn1
Ddb2	AU022751
Cdkn1a	Rap1gds1
Sirt4	Ap1s3
Accn3	E2f2
Ckb	Tead3
T2	Pla2g16
Mpzl1	Tspan12
Aox1	Tmeff2
Deaf1	Cx3cl1
Csf2ra	Lhfpl4
Leng8	Palm3
Tpst2	Zfpm2
Cdk2	Arf3
Dennd2c	Fzd9
Gm166	Stk32a
Mtus2	Twist2
Pla2g4b	Slc16a10
Lpin1	Fam187b
Zfp174	Rbp1
Mcf2	LOC547380
Tmem14a	Ccno
Gstm2	Col4a2
Snrnp48	Fam131c
Cd59b	Actg1
Tagap1	Prickle1
Gcfc1	Abcb1b
Ankrd12	Fam46a
Vamp2	Mical2
Scara5	Lmx1a
Iffo1	Efna5
4831440E17Rik	Gbp2
Ppcdc	Sfmbt2
Klhl17	Sct
Gmfg	Nlrp9b
Pla1a	1300014I06Rik
Fam178b	Nr6a1
AI507597	Lpp
Prss48	AU015836
Rab12	Gpr124
Lgals8	Mal2
Mt2	AA986860
Lst1	Pbx1
Aldh3a2	Frmd5
Rundc3a	Fam83f
Pdia5	Bmp1
Tmem126b	Crabp1
Bhmt2	Gnat1
Ablim1	Bex4
Nupr1	Dcaf12l1
Fbxl12	Tdrd1
Hoxc13	9930014A18Rik
Htatip2	Tapbpl
Gpr160	Jun
Tmem199	Fam57b
Pigyl	Alox5
Mfsd2b	Sel1l3
Tbce	1700008J07Rik
3110048L19Rik	Rps19
Ramp2	Gm14124
Tcirg1	Mfhas1
Hsd3b7	Gramd1c
Ankrd60	Slc2a5
Rasgrp4	Myh14
4933436C20Rik	Lgals3
Wdr62	Diras1
Nfe2l2	Myo1g
Ltk	2010015L04Rik
Ano9	Slc9a7
Eml2	Pfkfb3
Cat	Igsf1
Snora43	Gulp1
Hoxc4	Zeb2
Prss36	Wnt9a
Prpf39	6230409E13Rik
Mett5d1	Lrrc3
Thap3	Fzd1
1810020D17Rik	Ets1
Asb8	Mpdz
Lhx2	Peg3
2610110G12Rik	Itgb8
Cyp4f13	Fam84b
D14Ertd668e	Lad1
Neo1	Hdac9
BC002163	Kif1a
Bahd1	Cideb
Mtm1	Pelo
Clk1	Plce1
Yipf1	Dusp9
1700001O22Rik	Gm16529
D6Wsu116e	Gm3833
Mblac2	Ccdc36
Osbpl7	Fabp5
Gm1604b	3830417A13Rik
Dqx1	Ndrg2
Baz2b	Coro2a
Cd9	Vcl
Pdcl2	Zhx2
Lactb2	Dennd2d
Fbxl2	Tmem130
Cst3	Has2
B930059L03Rik	Nox4
Dram2	Camk2a
Fmc1	Cyb5d1
Sigirr	Syt13
Tekt5	Gm996
Cryzl1	Lrrfip1
Fgf11	H19
Syngr2	Nav2
Cpsf4l	Snx24
Npb	Foxj1
Pycard	Ngfr
Napepld	Raet1a
Mthfsd	Lamb3
Cyct	Ptgs2
Gnptg	Tpm1
Ankrd24	Nup93
St3gal4	Flnc
Ldhal6b	Arhgdig
Cd55	Enpp2
Grin2c	Cacnb2
Tcfcp2	Tdrkh
Sox15	Tmem59l
Pnrc2	Cldn6
Lyrm5	Pam
Trim34	Slc16a2
Lrrc48	Hist1h2ae
2810008D09Rik	Tlr3
1700066M21Rik	Dtx4
1810014F10Rik	Snx12
Ido2	Arl4c
Ephx2	Fras1
Nadsyn1	Anxa3
Leng1	AU015228
Morn1	Filip1l
Ppm1e	Cass4
Irx2	Slc47a1
Ezh1	Pdlim2
Dopey2	Pten
Mdp1	Atxn1l
Irgc1	Irs4
Apoc1	Vav3
Stat2	Mta1
Lgals4	Cyp2j9
Stk38	Tgfb1
Lrrc34	Lrrk1
Grid2ip	Cav2
Ftl1	Ror1
Mamstr	Galnt14
Tcta	Rasgef1b
Sh3glb2	Slitrk5
Rnf181	Chst1
G0s2	Crym
Osbpl6	Ppp1r14b
Fcho2	Tmem151b
Rasgef1a	Fam115c
Crisp1	Chst15
Rps6kl1	Cbln1
Tdrd12	Slc27a2
1700023D19Rik	Arl5c
Lysmd4	Slc39a8
Cep70	Tbcb
Mylip	Amotl1
Igfals	Col5a2
Haghl	Marveld3
Ablim2	H2-T22
Fam193b	H2-Ke2
Sorcs2	Tgfb1i1
Arl11	Cflar
Trim3	Gprc5c
Fam102a	Hs3st1
Eif3j	Dsp
Tmem68	Tmcc3
Fam63a	Stard10
Cept1	Frat1
Ccnl2	Id3
Cort	Eno1
Ap3b2	Mtap9
Uevld	Ppip5k2
LOC100047396	Ccdc85a
Ostf1	Grip2
A330021E22Rik	Bcl2
Tmem116	Cyfip2
Tigd2	Cyp11a1
Atp1b1	Ptpn13
Ccdc13	Nes
Hspb8	Acvr2b
Trpm1	Ddx4
Gm5595	Gata1
Prrc1	Egfr
Phyhd1	7420416P09Rik
Dmrtc2	Psors1c2
Rogdi	D5Ertd77e
1700048O20Rik	Arhgap8
Ece2	Slc16a7
Sh3bp1	Ctnnbl1
Tk2	Slc35d3
Fahd2a	Mkx
Cdk2ap2	Kbtbd8
Casp9	Cdk14
Mks1	Usp51
Gm6907	Parva
Exosc8	Glrx
Zfp712	Fign
Kctd18	Ids
Adck4	Crlf1
Ppargc1b	Thsd7a
Rnf170	Otud1
Ubd	Anxa2
Rnf208	Bhlhe22
Serhl	Dlc1
Eef2k	Bves
Pdgfa	Lama4
Tead4	Plxnb1
Esd	Vps36
Blvrb	Rgs20
Pqlc3	Neto2
Defb42	C130050O18Rik
Tatdn3	Sv2a
Vwa3a	Klf6
Pccb	Dock2
2010107G23Rik	Pkia
Grtp1	Car4
Syne2	Nufip2
2410137F16Rik	Gpr44
Fam82b	Prr19
Zfp655	Mep1b
Aldh1l1	Gpr161
Coq10a	Mmp15
2810410L24Rik	Bcorl1
Liph	6330407I18Rik
D6Mm5e	Sox8
Hes1	Rin3
Fam71e1	Zfp36l3
Fam26e	Nbl1
Dpp7	Tcfl5
Ccdc62	Gabra5
D4Wsu53e	Slc38a2
4930444A02Rik	Slc6a15
Tmem40	Lcat
2310003L22Rik	Stc2
2300009A05Rik	Rfx6
Traf3ip2	Tspan4
Ppp1r14d	5730559C18Rik
Ndufa6	B430319G15Rik
Zfyve21	Aim1
Gm10565	Gpr83
U2af1	Sf3b3
1300002K09Rik	Kynu
Fkbp6	Pou4f2
1810049H13Rik	Marveld1
Fam63b	Lhx6
Luc7l3	Efnb2
A330069E16Rik	Timp2
Alpl	Cnn1
Cdo1	Tmtc3
Gm15070	Irf2bp1
Maml2	Gpm6a
Cdk5	Irf8
Ndufb4	Foxi3
Dzip1	Sms
Sgol1	Pax8
Wsb1	Ctbp2
Inpp5d	Lypd6
Gm5577	Galnt3
Hyal1	Hs6st2
Glt25d1	Nckap1l
Irak4	Samd4
1810027O10Rik	Prkce
Gm13051	Spib
Nagk	Marcksl1-ps4
H2-Oa	Dclk1
Zfp810	Pgf
Amy1	Arl2bp
Serac1	Rims3
Scd1	Oasl2
Tmbim1	Cdh11
Ccbl1	Sall2
Fcgr3	Plekhg2
Dguok	Kcnh6
5730508B09Rik	Plcg2
Pias3	Gdap1l1
Zdhhc24	Slamf9
Tex9	Rab15
Steap4	Hsd17b14
Pla2g4f	Gm14139
Tmem205	Zyx
Gss	Nudt10
Zfp429	Cpne8
Ccdc76	Tssk6
2210415I11Rik	Cuedc1
C130074G19Rik	Marveld2
Nod2	2310014L17Rik
Rab24	Lphn2
Fam116b	Hmgxb4
Slc12a6	Mgst1
Rab11fip5	Grb10
Zadh2	Espn
9330151L19Rik	Bche
Tmem50b	AI504432
Rpain	Trib1
AW549877	Fam19a5
Ccdc68	Rassf4
2510009E07Rik	Dusp8
Plagl1	Sema6a
Lix1l	AA474331
Ankra2	Mtap7d3
Cdkn3	Kcnip3
Eif2b5	Frmd7
Tmem218	Rab36
2210404J11Rik	Rcor2
Slc39a11	Mapk11
Hrc	Ugt8a
Gm4902	Cysltr1
Tbc1d13	Lass4
Tex14	Sult4a1
Cldn19	Slc26a2
Gpr19	Hhip
Otx1	Tmem150b
Fryl	Cenpb
C330005M16Rik	Tmem54
Adrbk2	Pou3f1
B3galtl	Emb
Atp6v1h	Gabra3
AI464131	9330159F19Rik
Gpr108	Rasgrp2
Zfp229	D11Bwg0517e
Sult2b1	Zfp608
4930579G22Rik	Epha1
Rtel1	Thbs4
Ube2t	Gabra2
8430427H17Rik	Ptprn
Dnajc6	Mobkl1a
Brd9	Mbnl3
Ankrd16	Crispld1
Cxcr7	Stra8
Patl2	Pcbp4
Pold4	Osbpl5
Slc22a18	Unc45b
Pdlim4	Styk1
Clcc1	Fbxo32
Ciz1	Hmgb2
Sema5a	Prmt8
Mgmt	Adam8
Pla2g2c	Cald1
1600016N20Rik	Btn2a2
Npr1	Cdc27
Fbxo44	Pde5a
Garnl3	Gpr1
P2ry2	Bcl7c
Scn8a	Serf1
Immp2l	Rnf217
Cmtm7	Cebpa
Zeb1	Gcm1
Pros1	Ildr2
Lrrc39	Mfap2
A830080D01Rik	Lrrc58
Srsf18	Tmem45b
Nr2c2ap	Spock2
BC037034	Smad6
Wdr16	Cdh24
Ndufa3	Bend5
Slc19a3	Khdrbs1
Ggt1	Calcr
Kif5a	Tubb3
Kit	Fbxo2
Slc27a1	Gatm
Ccbl2	Ccdc86
B3gat3	Fbxl16
Hscb	Sfn
Vat1	Procr
Mcm8	Fam184a
1700030C10Rik	Plin5
Ccdc52	Eif4g3
Phyh	Gnpat
2700046G09Rik	Lypd6b
St3gal3	Uba6
Neurl2	N6amt2
Efhb	Zc3h18
Plekhm2	Plod2
Cnn3	Tgfa
2010011I20Rik	Polr2d
Rps15	Btbd17
Inpp5k	Rasl10b
Clybl	Pphln1
Uggt2	Sepp1
Ankzf1	Lypd1
Ube2b	Sema3c
Alpk3	Muc1
Sema3f	F5
1110021L09Rik	Cnn2
Spp1	Egr2
Tmc7	Cdh9
Tbx18	Fgf5
Cml1	8430429K09Rik
Amdhd2	Lamb1-1
AU042651	Cacna1s
Rab2b	Ak3
Ccdc57	Greb1l
Dpp6	Stbd1
Lgals12	Fam83b
Neil2	Slc8a2
Ifi27l1	Tmem62
Ddo	Ptpn9
Sirt3	Dusp27
Bmi1	Greb1
1110003E01Rik	1700017B05Rik
B3galnt2	Fam196a
Ccdc155	Fosl2
Clcn1	Plvap
C8b	Mecom
Vwf	Fam102b
Syngr4	Alox12e
2700099C18Rik	Arhgef5
Vamp1	Ccdc116
Ccdc123	Tgm3
Figf	Slc23a1
Cd300e	Fndc3c1
Alkbh2	Fam60a
4930548H24Rik	Slain1
Slc38a6	Miat
Hmgcl	Pramel1
Rpl26	Grk5
Cyp1a1	Rgs2
Trim15	F2r
2610020H08Rik	Pkdcc
Gabbr1	Nrk
A4galt	F8
Gramd1a	Wnt7a
Rnf43	1810011O10Rik
C030034I22Rik	Slc40a1
Slc9a8	Scin
Klhl22	Penk
Copz2	Timp3
Ccdc141	Gria3
4930581F22Rik	Mtap7d2
Tmprss12	Bik
Btnl7	Lats2
2210012G02Rik	Rasef
Pkd1l3	Celf4
Crlf2	Slc25a4
Cyp4f17	4930594C11Rik
Pts	Ppp1r1a
9030607L17Rik	Mmp25
Cib3	Sox11
Gstm1	Slc35f1
Usp46	Prtg
Gapdhs	Dusp6
Gpr137b-ps	Myl9
Masp2	Qser1
Sh3gl2	Syn1
Sgsm1	C030019I05Rik
Entpd2	Tmem100
Zranb2	Syt4
Slc44a3	Esrp1
Pla2g5	Shc4
Srrm4	Magel2
Jakmip1	Nrsn1
Ppp1r3b	Fermt1
Osm	Foxn3
Atp5s	Cdh10
0610007C21Rik	Crmp1
Plekhn1	Ccdc64b
Sfxn3	Fgf14
Mlf1ip	Puf60
Snhg7	Dpysl2
Snord123	Vstm2a
Ndufa13	Mfsd2a
Tnrc18	Vash2
Nsmce4a	Gan
Hexdc	Lrrc8c
Gm13889	Ssbp3
Echdc2	Hmgn3
1600029D21Rik	Tcp11l1
Cln3	Shisa6
Tmem25	Slc5a5
Gbgt1	Chst5
Chchd10	Ptpn4
Mobkl2c	Adamts1
Glt8d1	Car3
Slc1a5	6030419C18Rik
Asns	Tanc2
Rasl10a	Agpat4
Ppapdc1b	Mlxipl
Triml2	Lpar4
Rpl10a	Pacsin1
Pkmyt1	2007-09-02
Stat5a	Slc4a4
Gm6251	Heg1
Ntn3	Brsk1
BC024814	Nipal4
Piwil1	Ms4a4d
Mmab	Macc1
G6pc3	Adk
Gadd45b	Sntb2
Mfsd1	Rimkla
Mpv17l	2810432L12Rik
Tspan17	Rab33a
C8g	St8sia1
Afap1l2	Inpp1
St6galnac6	Dnahc11
Gna15	Gcsh
Dscr3	Cdk2ap1
1500011H22Rik	Fam171b
Slc2a8	Setd7
Phactr2	Jakmip2
1700094D03Rik	Bmp8b
2610021K21Rik	Dpysl4
Mllt10	Cyp2j13
Treml2	Col5a1
Paqr4	Cnksr1
Antxrl	Slc39a10
Plekhf1	Gpr4
Arvcf	Cytsb
Slc24a6	Ephx4
Phkg1	Fut4
Kdelr3	Gabra4
Pcsk6	Mrps23
Fbxl4	Kif2a
Gm757	Synpo2l
2310030G06Rik	Gng11
Ogdhl	Rnf122
BC026585	Gstk1
Dkkl1	Lck
Gsc	Myh3
Tnfrsf18	Eif2s3x
Dync2li1	Tmie
Kank1	Nfasc
Gm5134	Rab3d
Sema4g	Stx1b
Prex1	Slit3
9030409G11Rik	Sfrp2
Plekhb2	Cpm
Gcnt4	Reep2
Pdxk	Id2
Cadm4	Xkr4
Sipa1l2	Lrrc8a
Lrrc18	Slc15a2
Ech1	Phlda1
Slc41a3	Grm6
Uqcr10	E2f7
Tmem221	Fgd2
Ccdc28b	Sox4
2310079F23Rik	Notch3
Nudt17	Pard6g
Ccdc63	Ldoc1
Acyp1	Hapln4
Kbtbd3	Ube3a
Pex3	Mfap4
BC016495	Zfp618
Aff1	Rnf44
Paqr8	Sh3bgr
Slc2a7	Adamts6
Spata6	Pnp2
Polr2e	Apba2
Wdr93	Fat1
Zmynd17	Crim1
1500012F01Rik	Phf6
Mapk1ip1	Mboat1
Glb1	Chd7
Stard6	H60b
Ooep	Hist1h1b
Pde8b	Thoc4
Isca2	Slc5a4b
Nqo1	Il33
Mdm1	Cnksr2
6230400D17Rik	Wdr1
Zdhhc14	Kcnd1
Ccdc46	Sall4
Slc25a36	Rbm46
Rnf144b	Ept1
Tmem175	Vwa2
Dclk3	Bmp6
Acpl2	Ubash3a
Hadh	Gm7334
Gipc2	Mapk3
Hspb11	Myo1d
Nudt12	Ctcfl
Syngr1	Kpna3
Hoxb4	Msx2
Atf4	Gstt1
Hmha1	Pkp2
Sike1	Tcf15
Mpzl2	Msl3l2
Fgf10	Set
Cpt1a	Rem2
Rfxank	Ppfibp1
AI413582	Aebp1
Pip5k1b	Dzip1l
Hoxd8	Adamts19
Appl2	Zfp334
Rps27	Gramd3
Tsix	Kcng1
Plekhg1	Vgll3
Rrm2b	Phactr1
Gm10136	Kcnj3
Trim26	Stx11
Insig1	Slitrk4
Fhit	Acsl4
Txnip	Chrna9
Vax2	Rab32
Cbx4	Mfap3l
Spef2	BY080835
Cyp4f39	Pvrl4
Rfx8	Insc
Ahsg	Ldlrad3
Syne1	Ttc21b
Sec61a2	Flywch1
Cdkn2a	Junb
Car5a	Xylt1
1110020A21Rik	Col4a1
AI428936	Snrnp40
Pdzrn4	Bgn
Cep72	Gria4
Plekhg3	Lin28b
Yipf7	5330426P16Rik
Tcl1	Insm1
Trpt1	Uspl1
Haus8	Xpnpep2
Il2rg	Il17b
2810030E01Rik	Elavl4
Tuft1	Znhit1
6330416L07Rik	Parp9
Zc3h7a	Cldn1
Ctsa	Dusp5
Aox3	Fam189a1
Sdcbp2	Rab3b
4930432O21Rik	Ccdc89
Rpa3	Gnai1
Ica1	Igsf11
Ttc39c	Col7a1
Ap3m2	Susd5
Fam173a	Ltb4r1
Casp7	Ptar1
1700021C14Rik	Bex1
Peli3	Egln1
Morc1	Hpca
Rnft2	Map3k14
Ttc38	Wscd1
Gm13157	Fam84a
Zfp40	Ccdc102a
St7l	Sema3e
Slc34a3	Fndc5
Mcee	Rin2
Hap1	Suclg2
F630110N24Rik	Papss2
H2-T24	Hunk
Dnase2a	Sertad4
Rpp21	Lhfp
Acy1	Cacna1g
Sh3tc2	Park2
Plekha4	Leprel1
Sec31b	Il17re
Cnpy1	Magi2
Emp2	Dppa2
Rab7l1	Ano8
4933406J08Rik	Col11a1
LOC106740	Maml1
Adam32	Bcl9
Ttc28	Mc5r
Myl2	Ctnnal1
Elovl7	Cib2
Id4	She
Gng12	Spon2
Cntd1	Vat1l
Zfp78	Mtdh
D17H6S56E-3	Rims4
Sdr9c7	Ltb4r2
Anubl1	Usp44
Galr3	Trim36
Smad9	Kcnk1
Nrn1	Jmjd1c
Cyb5r2	Arhgap10
Rps3a	Fam46b
Padi1	Arhgef10
Pnpla3	Purb
Nubpl	Hist1h3g
Apod	Thbs2
Olfml1	Pabpc4l
Ttc14	Srrt
Sult6b1	Nfat5
Rcor3	Necab1
1700096K18Rik	Pdk1
1700019D03Rik	Gpr63
Col20a1	Wasf1
Ccdc61	Cobll1
Fam36a	Usp22
Cdkl4	Slc43a1
2410137M14Rik	Tubb4
Saa3	Nrsn2
Ubc	Nkx3-1
Dnajb13	Guca1a
Pnldc1	Slc7a5
A330049M08Rik	Zfp790
Oas1b	Pvrl2
Atp6v0b	Neurod1
Neat1	Cpz
Acsf2	Fam169a
Bglap-rs1	Twist1
Prickle2	AW551984
Nt5c3	4631416L12Rik
4933439C10Rik	Naprt1
Il10rb	Prom2
Dmgdh	Kctd8
Pltp	Myo5b
Smyd3	Coro1a
Cenpw	Cnrip1
Rhbdl2	Mapkapk2
Mtmr4	4833419G08Rik
Myo1a	2010107G12Rik
1500001M20Rik	Lin28a
Fam161a	Timm8a1
Pfkm	Stab1
Mitf	S100a6
Map6d1	Galr2
Dact2	Rhoc
Zfp3	Cd247
Spata7	Fam83g
Sdr39u1	Kcnmb4
A2ld1	1190005I06Rik
9630041G16Rik	Zfp619
2310039H08Rik	Tec
Mlycd	Stxbp6
Gas5	Clvs2
Tubg1	Srp54a
Dppa3	Prdx6
Gm4769	Zdbf2
Gstm3	2210010C17Rik
Hk1	Wnt4
Prr15l	Tpm2
Snora69	Pcdh1
Slc25a34	Plcb1
Mocos	Clstn3
3110052M02Rik	Hck
Gstm4	Casp8
Creg2	LOC100046186
Ptgr1	Bcam
Cacng5	Cdkl1
Fank1	Sema6b
Kcnu1	Pon2
Tnip2	Loxl2
Ccdc74a	Tmco7
Prss8	Hfe2
AI854703	Trove2
Ubtd1	Mmp2
Cables1	Pqlc1
Ndufaf3	Crabp2
Zer1	Sntb1
Sstr2	4921507P07Rik
Rad51l1	Bcl11a
Cd68	Tmem35
Acads	Ubtd2
Rwdd3	Gucy1b3
Fam76a	D330045A20Rik
Lrrc29	Dnmt3b
Ccdc107	Zfp647
Tdrd9	Cdkn1c
Psen2	Ank2
Hmga1	Plk2
Rab17	Spin2
Adh1	Sh3d20
Casp14	Arhgef9
Leng9	Mfap5
Card6	Kctd11
Alkbh6	Phc1
Tmem192	Mup6
Adamtsl5	Sh3rf1
Lrrc51	Atp4a
4930404N11Rik	Gpr39
Nlrp4f	Mtap2
Pm20d2	Khk
Nlrx1	Hspb2
Acpp	C1galt1c1
Sema6c	Rap2b
Cxcl17	En1
Itpka	Sox7
Tcfap2a	Xkr6
1190002A17Rik	Zswim6
Fbxl8	Syt1
Cela2a	Calml4
Serpina3h	Ubash3b
Cct6b	Eras
Rell1	Peg10
Slc30a10	Zmynd15
Gm10789	Rps6ka6
Anxa8	Fosl1
Trim13	Stard13
Lrriq4	Vwce
Mgrn1	1700008I05Rik
Angptl6	Uprt
Ppox	Fam109b
Mbp	Eif4g2
Syap1	0610040J01Rik
A530054K11Rik	Wnt7b
Aldh1a3	Capn2
Fn1	Man1a
Eno2	4632428N05Rik
Psap	Adamts14
9530008L14Rik	A830093I24Rik
Gm4013	Cpne7
Gkap1	Skil
Spata1	Il1rap
Catsperg1	Synj2
Snhg6	Arid2
Bmp7	Best1
Snx20	Hmgcll1
Tnni3	Podxl
S1pr1	Samd4b
Efna3	Metrnl
2810055F11Rik	Tek
Trim10	Icosl
Cbx8	Gja1
Batf2	Trim44
Triml1	Ikbke
Ttc12	Sulf1
Ccdc90a	Dtx3l
Rpl18a	Gm1060
Whamm	Hspa1a
Sec1	Chst12
Cenpv	Klhl9
Rbm3	Nhs
E130311K13Rik	Phf19
D230025D16Rik	Tor3a
6720401G13Rik	Fbxl7
Tmco4	Pvrl1
Slc12a7	Ldoc1l
Gpx1	Plk5
Rasgrp1	Parp8
Grn	Ppp1r14c
Pknox2	Cacna1b
5930412G12Rik	Ankrd11
Dio3os	Fam5b
P2rx4	Nanp
Aldoc	Jazf1
1300010F03Rik	Clip3
5730469M10Rik	Parp12
Caps2	Med14
Cd38	Adamts4
Rnf135	Lmod1
Cttnbp2	Rsph4a
Sfrp1	Ehd2
Glb1l2	Rnd1
Fam53b	Pnmal2
Tnni1	Hist1h4i
BC018465	Cthrc1
Slc31a1	Stox2
Prdm16	Pth1r
Rnf207	Cd74
Arrdc2	Cd248
Snord4a	Gchfr
6430550D23Rik	Bysl
Cfh	Dag1
Vmac	Fgfr2
Mdfic	Bag2
Fam122b	Hbegf
Cdkn2c	Trpc1
Sdc2	Fam115a
Cd302	Cdca7l
Hebp1	Rnf144a
Pbx4	Tbxa2r
Nt5dc3	Sncb
A230050P20Rik	Pramef8
D5Ertd605e	S100a4
Idh2	Shisa3
Crybb3	Hecw2
Prdm14	Asphd2
Hoxd9	Zdhhc23
Card9	Lrp2
Gabrp	Cysltr2
Snord65	Dusp26
Tmem144	Thsd1
Rpia	Mxd4
AI662461	Obsl1
Ybx2	Cldn5
H2-Eb1	Ptprf
C1qtnf6	Kdr
Laptm5	Anpep
Zc3hav1	Hist1h1d
Kctd6	Ltbp1
Dnahc8	Gli3
Susd1	Cad
Rpl11	Igdcc4
Prss38	Fam19a4
1700061G19Rik	Tnfaip3
Qpct	Enho
Ly6g6e	Dcakd
Uap1l1	Fzd3
Pttg1ip	Nudc
Inpp5j	Fam163b
Prr13	Nlrp6
Radil	Otx2
Tpcn2	Ap2b1
Sarm1	Dock3
Lgals3bp	Dgki
E130306D19Rik	Tub
Hnf1a	Dos
Ift46	Magi1
B3gnt9-ps	Sestd1
Crat	Stxbp4
Tpp1	Cul1
Ccna1	Tuba1b
Pigp	Atp1a3
Fam3b	Pdlim7
Sirpa	Fgfr3
9530077C05Rik	Gadd45a
Trak1	Adcyap1r1
Abcd4	Tmem39b
Aox3l1	Tbx4
Rec8	Gas8
Matk	Zcchc3
Ulk4	Mycn
Sncg	Trip6
2210417A02Rik	Xpo7
Slc16a4	Nmi
Slc25a42	Ms4a6d
Aig1	Ctdspl
Btg1	LOC100046827
Clcnkb	Adcy1
Adc	Klf12
Snhg10	Shd
Rhbdd2	D19Ertd652e
Pde8a	LOC100048295
Tsga10	Ocln
Dbil5	Ptpru
Unc5cl	Rasgrp3
Mapt	Ier2
4831426I19Rik	Hspa4l
Capza1	Gm1045
9430041J12Rik	Aadac
4930402H24Rik	Nexn
6030422M02Rik	Srl
Eya1	Upk2
Mbl2	Bmp8a
Scarf1	Ptpn14
Ank3	Eif4ebp2
Hacl1	Ankrd45
BC048644	Cyyr1
Sgk3	Gata3
Accsl	Nov
Fez1	Ankrd42
LOC100034739	Gtf2i
Tex15	Pde2a
Sucla2	Slc35e4
Scnn1a	Bzrap1
Rnf6	Sox3
1700123I01Rik	Cgn
2410076I21Rik	Tmem125
Dpm3	Ncs1
Ctnnd2	Rab27a
Nfe2l3	Foxo1
Ppfia4	Efna2
Ppil6	Fzd6
Naga	Eif5a
Tradd	6530418L21Rik
Ng23	Dbn1
C230055K05Rik	Trpv2
Fam114a1	Ppl
Rapsn	Nudt11
Hdac7	Gli1
Rabl2a	Shisa7
Elf4	Kif1c
2210015D19Rik	Grip1
Dap	Supt4h1
2700094K13Rik	LOC100045188
Lyrm7	Cend1
Obox6	LOC634379
Ccbe1	Arhgap6
Cd2	Tcp11l2
2010317E24Rik	2610018G03Rik
Scarb1	Metrn
Adrb3	L1td1
Atp6v1g2	Tmcc2
Mst1r	Mnd1
Cd300lf	Otub2
Arfgap3	Tmem229a
Tulp2	Ssx2ip
Snord49a	Impdh1
Ppm1k	Cd276
4932415G12Rik	Itga9
Ulk1	Wwc1
Lamp2	Nrxn2
5033404E19Rik	Aoc3
2210021J22Rik	Herc1
Car13	Flnb
Snx9	Ceacam19
5730408K05Rik	Ccnd2
Sccpdh	Emilin3
Hsbp1l1	Prph
Hexa	Fam20c
Zfp516	Zim1
Lipc	Lrrc61
Crxos1	Ncan
Ttc9	Pak6
Trim50	Rgs19
6030446N20Rik	Dll3
Ahrr	Ephb2
Ktelc1	Aqp5
Rnf32	Smarca1
Heatr7a	Sox18
Hhat	Rgnef
Tspan32	Kbtbd13
Lama3	Coch
Cep55	Aqr
Ccdc43	Mapk8ip1
Srgn	Dgkk
Mlana	Tal1
Meg3	Trim2
4931408A02Rik	Ttc39a
Zfp57	Bbx
Fads6	Ccdc65
Gm5077	Pard6b
Anxa4	Ttll1
Wdr13	Hif3a
Ehhadh	Adamts10
Il28ra	Col8a2
Osta	Slc1a3
E530011L22Rik	Sssca1
Vhl	Pdlim3
Nxt2	Amz1
Hoxc12	Grb7
1700125H20Rik	Ccnt1
Kcnab2	Rps27a
Slc39a4	Dcbld1
Ccdc136	Acsl5
Cdc42ep2	Akap2
Mrpl33	Arl10
Gpat2	Fam69a
Ccdc39	Cd6
2310002J15Rik	Aldh9a1
Oas1a	Spata13
Zfp28	Trim46
Inha	E130304I02Rik
Dnm1	Gna12
Prickle3	Gng3
Gm13152	Pde4a
3110002H16Rik	Cdkl2
Inca1	Cdh3
Pkd2l1	Id1
Auh	Cited2
Ogt	Kctd15
Gm14316	2900073G15Rik
Malt1	Tlr2
Gata4	Plxdc2
Zfp455	B3galnt1
Stag3	H2-Q10
Ckmt1	Ddx25
Ypel2	Nfkbie
Ctsb	Cacng7
Axin2	Ube2s
4833420G17Rik	Rnpep
Fermt3	St8sia3
Zfp534	Abcg2
Cdx1	Igfbp7
Slc39a13	Perp
Zdhhc19	Ptprz1
E2f5	LOC100048650
Ffar3	4930486G11Rik
Dtx1	Wdr86
Gm71	Igtp
Bcl2l15	Spred1
Rab11a	Pxdn
Abcc10	Syt11
Zyg11a	Atp10a
D430019H16Rik	Spnb1
Hnf1b	S100a16
4930404I05Rik	Cdk6
D630032N06Rik	Rims2
Kazald1	Tm4sf5
Dazl	Prkcdbp
Fam181b	Fam171a1
Alg6	Elovl4
Sstr5	Gm6682
Dnahc10	Atcay
Birc7	Fzd2
Gm8615	Tmem90b
Erv3	Dnajb3
Plin3	Gm3258
Epn2	Ddr1
Hdhd1a	B3galt1
Egfl8	C230081A13Rik
Aadat	Lmo4
Akap7	Tpst1
Rint1	Ctnna1
Lmx1b	Lingo3
Cd22	Mex3a
Renbp	Trim14
Bbs12	Rexo2
Cd7	Usp6nl
Gpr68	Thbs3
Vamp4	Plec
Fam134b	Ammecr1
Hexb	Cdc6
Rgma	Slc1a6
Acsbg2	Pdgfrl
Pgpep1	Meis3
Gm4532	Accn2
Arhgef19	Kpnb1
Zfp600	Jag2
Neu1	Mmd2
Macrod1	Pax6
Il6ra	Fmnl2
Hesx1	Thop1
Klhdc1	Itga6
Tdp2	Kif5c
Zscan4c	Shroom3
Camkk2	Csdc2
Selplg	Zfp473
H2-D1	Spnb2
Gm694	Stim2
Creb3l2	Pls1
Gpr114	Tmem163
E230025N22Rik	Vash1
C4a	Phb2
Gsta4	Adcy7
Oas2	Fbn1
Pgc	Plekhb1
Sh2d4b	Rassf9
Ldhd	Hdgf
Myo6	Srf
Fam71f2	Fam43a
Ebi3	Tigd5
Ei24	Gnaz
Capn5	Klhl34
0610011F06Rik	Fam59b
Zbtb38	Prr7
Ctsc	Mns1
Hsh2d	Rbp7
9630033F20Rik	Bambi-ps1
Cln5	Dlg4
3000002C10Rik	Usp26
Tecpr1	Denr
Treml4	Esam
C230035I16Rik	Pbrm1
Fbln1	Irs2
Mst1	Mrc2
S100a1	Socs1
Gm1679	Rhox13
Serpinb1a	Magee2
Ifi35	Rgs16
Pttg1	Tns3
Asah1	Fam83h
Nlgn1	Cntnap2
Ttll11	Ccdc120
Cd59a	Lrrn4
Rac2	Adamts8
Ms4a10	Casc4
Tmem106c	Spna1
Fut2	Gfod2
Aga	Arhgap23
Fam189a2	1810010H24Rik
Slc4a5	Cilp2
Tsks	Phgdh
Casr	Epcam
Ntrk3	Lsr
Idi2	Haus4
Ly6k	Plekho2
Gdi1	Ppa1
Tnfrsf4	Bicd1
Gpx2	Plaur
Taz	Tlcd2
Sh3gl3	Rprm
Slc9a3r2	Hmga1-rs1
Timp1	Arhgap29
Rsad1	Steap1
Sfxn2	Pik3r5
Abhd14b	Vmn2r-ps14
Tcn2	Pwwp2b
Acss1	Oprl1
Dmd	Lbh
Oas1g	Cgnl1
Mobp	Mthfd2l
Dynlt3	Trp53
Aldh6a1	Ticam2
Golga1	Phf7
Apoe	Bnc2
Polk	Nxph3
Snord47	Itgb3
Lin7b	Rassf3
Gm9376	Mypop
D330028D13Rik	Bcl9l
Ppap2b	Dlk1
Mir196a-1	Ccdc158
Aqp11	Ywhah
Klhl4	Pfn1
C030016D13Rik	LOC100047930
Ebf4	Enpp3
Ddit3	L1cam
Pisd-ps3	Gbe1
Tert	Mlkl
Sfpi1	Elavl3
Sohlh2	Gfpt2
Crhr2	Nhedc2
1110007C09Rik	Acsl6
4632428C04Rik	Utp20
Phxr5	1600021P15Rik
Gpr146	Plcd1
C330021F23Rik	Mt4
4930578N16Rik	Lgals9
Fmn1	Spink3
Rilp	Mettl13
Col17a1	Cd200
AU040829	B3gnt7
Ipp	Kcmf1
Btnl1	Tcea1
Cd27	Il17d
1190002H23Rik	Spry2
A430105I19Rik	Flna
Smpdl3a	Bms1
H2-T3	Stk10
Phc3	Tmem28
Galc	Elk4
Susd2	Tjp2
Fuca2	Pemt
Gm1027	2010204K13Rik
Got1l1	Pcgf3
2610305D13Rik	Mxra7
Vax2os2	Ngb
9330176C04Rik	Rrad
Trim63	Ppap2c
Aqp3	Skp2
Arl3	Ceacam20
Thrsp	Trim71
Bdkrb2	Sorbs2
A930004D18Rik	Mfsd5
Fam81a	Tigd3
Gabrg3	Syt14
Myof	Rbpj
Enthd1	Bcl2l11
Avpr1b	Anxa6
4930422G04Rik	Myl6b
Pabpc6	Klk8
Cerk	Smad7
Lrrc15	Ncoa7
Sdc4	Fgd5
Icam2	Mcph1
Adhfe1	Syp
Relb	Epha4
Klhl10	Bdnf
Oasl1	1810041L15Rik
Tarm1	Cnp
Mmel1	Rxrg
Zmat5	Them4
Tlx2	Dmrt1
Rps8	Gdpd5
2610035D17Rik	Cacng4
Dmc1	Emilin2
Pnma5	Arntl2
BC066135	Psd
Ttll8	Crebbp
Aldh1a2	Pnmal1
St6gal2	Kctd12b
Eps8l2	Rarg
Pou2f3	Nbeal2
Dennd1c	Arap3
Cox7a1	Fam38a
Fsd2	Spn
Gm9705	Slc7a7
Snora34	Zfp109
Tmem20	Gdf11
Grina	BC068157
Tmem117	Mapk1ip1l
Gjb3	Gbx2
F2	Nckap5l
Kdm5d	Pkp4
Pou6f1	Ncl
Zscan4e	Mmp14
H2-Ab1	Cplx1
Car8	Carhsp1
Ip6k1	Zfp518b
Smok4a	Iglon5
Ly96	Nkapl
Grb14	Zfp365
Slc10a6	Zfp36
BC029214	Acaca
Wscd2	Olfm1
B230206H07Rik	Mgat4c
Fabp3	Nbea
Trim69	Mex3b
Tbx2	Nsun3
C1s	Gpr85
2310046K01Rik	Bend3
A230072C01Rik	Dapk3
Abca7	Lysmd2
Btn1a1	Itga3
Kcnip2	Nell2
Tpra1	Adcy2
Zfr2	Wipf3
Zscan5b	Mtap1a
Zfy2	Phf15
Slc26a11	Fjx1
BC020402	BC048355
Gm10069	Pla2g1b
Cerkl	Zcchc12
0610040B10Rik	Klrg2
Gm5887	Cdkl5
Npas2	Fam100a
Idua	Mkrn1
Slc28a3	Sfrp4
LOC100044565	Alox5ap
LOC100045506	Heatr1
AI506816	9830001H06Rik
1700057K13Rik	4933407C03Rik
Tmem173	Thy1
Mcoln1	Prkch
Vmn1r53	Gpd2
Slc11a1	Tle1
Optn	Ttyh3
Ica1l	Psmb10
Nlrp9c	Cnih2
Spag4	Nccrp1
Rbm12b	Npw
Ifi30	Obfc2b
Dcdc2a	Pdia4
Islr2	Pkig
0610039K10Rik	Dnmt3a
Mettl7a1	Otop1
Tesc	Pgm2l1
Mir7-1	Cbx1
Fkbp7	Gypc
Creg1	C80913
Camk2n1	Igf2bp1
Fam40b	Prrg4
Serpina7	Dars2
Hsf4	Lix1
Mir92-2	Snx33
Irak1	Mett10d
Aloxe3	Arg2
2007-08-31	Bmp2k
Oaf	Dbc1
Bri3	Smpdl3b
Atp8b5	Sycp1
Npr2	Tubb6
4921517L17Rik	Ddx6
Acp5	Mki67ip
Neil3	Pea15a
Spdya	B4galnt1
Tnnt1	Car2
2810403D21Rik	Olfr307
Ephx1	Prrx2
S100a13	Stk4
Pgbd5	Prss46
Cpn2	Plch2
Map3k8	Manf
Mak	Arnt2
Fnip2	Sort1
Slc17a5	Moxd1
C1qtnf4	Zfp568
Fndc1	Baz1a
BB123696	Grwd1
Ddx26b	AA388235
Slc7a9	Lrfn4
Tceanc	Isyna1
1700020D05Rik	D10Wsu102e
Tmem106a	Kcnk6
Tmem191c	Zcchc14
Hal	Usp31
Ndrg1	Epor
Phka2	1110012J17Rik
Sgsh	Hpcal4
Gm10406	Utf1
Rgs3	Bbs2
Cyp2b23	Nrgn
Pnpla7	Gemin5
Slc37a2	Epha2
Snora26	BC013712
Gdf15	Esrp2
1700009P17Rik	Nt5dc2
Txndc16	Zfp764
Plekhm3	Mon1b
Ly6e	Tex21
Gja4	Fscn1
Gabarapl1	Brwd3
Ptpn22	Paqr9
Gm13154	Tmem57
Glt25d2	Akap13
Sh3tc1	Pklr
Amac1	Wdr46
Cd164l2	Slc18a3
Ly75	Nefh
Efcab10	Syt5
Spink10	Arl4a
B930041F14Rik	Slc17a7
Sorl1	Raet1b
Klhdc7a	Zfp94
Atp6v1g1	1700020N01Rik
Traf1	Parp14
Dixdc1	Rab30
Snx32	Ubfd1
Cyp4f41-ps	Fam101b
Ampd3	Slc16a13
Shpk	Rps6kc1
Hprt	Zfp697
Slc16a9	Ifit2
Apcdd1	Otud4
Lefty1	Akr1b8
Ctsw	Runx3
Gem	Zfp286
Pla2g4e	Srd5a1
BC065397	Gen1
Tmod4	Itga7
Pcdh19	Parm1
Kcnc4	Etv1
Naalad2	Igsf9
6330416G13Rik	Rbm27
Gm11961	Lamc1
Ldhb	Gpatch4
Dync1i1	Khdrbs3
Rbm20	Nup35
Mir300	Gfod1
Elmod2	Slc7a6
Il17rb	Zfp560
Arhgap9	Mdfi
Snhg3	Actn3
Unc13d	Gpr173
Timm8a2	Fam171a2
Man2b2	Rtn1
6230427J02Rik	Smo
Padi4	Dpp4
Klb	Fam162a
Afap1	Hspg2
Tmem211	Myc
Cd3g	Bin1
Fgf3	Eif3b
Wfdc2	Gap43
Cd63	Rpl27a
	Fgf17
	Dusp3
	Ipo5
	Slc36a4
	Foxr2
	Tle4
	Ada
	Ehbp1l1
	Eftud2
	Prmt2
	Chrna7
	Ipo4
	Klhl13
	Ext1
	Itgb1
	Olfr20
	Zfp74
	Camsap1l1
	Ppm1g
	Pfkl
	Prcp
	Sec24c
	Lyar
	Gcom1
	Chrm4
	Lsm12
	Eif4g1
	Ddx21
	E2f3
	Gpr153
	Rapgef4
	Exog
	Zswim4
	Pla2g4a
	St3gal5
	4930402E16Rik
	Nat8l
	Dear1
	Fndc4
	G3bp2
	Galnt10
	Gm962
	1700034H14Rik
	4933404O12Rik
	Slc12a4
	Bmpr2
	Zbtb33
	Upk3b
	Mthfd1l
	Nlrp14
	Cdc73
	LOC100047211
	Rnf145
	Ywhab
	Ahdc1
	Etv2
	Cttnbp2nl
	Tcerg1l
	Limch1
	Robo1
	Basp1
	Klhl23
	Lrfn3
	Nrp2
	Ddx39
	Dapp1
	Rspo1
	Tmem121
	Fam46c
	Enc1
	Rpl15
	Lrrc16a
	Letm1
	BC032203
	Hr
	Etnk2
	Ier3
	9130019O22Rik
	E130112L23Rik
	A230073K19Rik
	Myadm
	Clgn
	Scap
	Gm15428
	Afap1l1
	Gna14
	Slc38a3
	Gm5506
	Gatsl2
	Ankrd13b
	D830031N03Rik
	Jmjd4
	Myh6
	Bcar1
	Ptch2
	Zfp628
	Lcor
	Fkrp
	Zfp467
	Kirrel
	Qpctl
	Rab13
	Fam49a
	Ovol1
	Etv4
	Ldha
	Gm5465
	Arc
	Mid1
	Prkcb
	Sez6
	1700027A23Rik
	Gpx3
	Arrb1
	Rrp12
	Foxn4
	Apol8
	Aif1l
	Fgf18
	Creb3l1
	Nuak1
	Palld
	Prr5l
	Rai1
	1110036O03Rik
	4930512B01Rik
	Pbx3
	Mest
	Tet3
	Camkv
	Pde4d
	Smpd3
	Fam183b
	Nmral1
	Pcsk1n
	Itga5
	Atic
	Eef1a2
	Ston2
	Traf4
	Arhgap33
	Ehmt1
	Kars
	G530011O06Rik
	Sf3b4
	Efs
	Npas1
	D16Ertd472e
	Hipk2
	Anp32b
	Ehd1
	Tmod2
	Bcl6b
	Akr1b3
	Larp1
	Rbm15b
	Crip2
	Celsr2
	Hrsp12
	Fkbp10
	Mip
	Nek4
	S1pr2
	Iffo2
	Jph4
	Kcnj10
	Glo1
	Prr5
	Hdc
	Nup50
	Vwa1
	Ece1
	Lpcat4
	Fam184b
	Prss44
	Mtap1b
	Lphn3
	Ltb
	Klf7
	Cul7
	Ddx18
	Rab31
	Col18a1
	Jub
	Hsd11b2
	Reep3
	Kcnn4
	Tmx4
	Arhgdia
	Ube2cbp
	Psd3
	Plxnd1
	Pld2
	Rgs12
	Dysf
	Snrpn
	Arhgef17
	Fgf13
	Lrp6
	Slc24a1
	Top1
	Clnk
	Pou2f1
	Ly6h
	Rpl21
	Rapgef5
	Vars
	Pnp
	Clcn5
	Loxl1
	Itpripl1
	Slc39a14
	Cdr2
	Zfp828
	Ptpn1
	Pdcd11
	4930572J05Rik
	Nsun2
	Aimp2
	Tpm3
	Adcy6
	Cdx4
	2200002D01Rik
	Mak16
	Sephs1
	Ocel1
	Enah
	Prdm11
	Enox1
	Ube2v1
	Foxr1
	E330009J07Rik
	Pdzd2
	Gpr155
	Mina
	Heatr3
	Zmiz1
	Cdk12
	Rapgefl1
	Cntfr
	Tmem132a
	Dnmt3l
	Rest
	2010109K11Rik
	Ccdc92
	Sh3kbp1
	Mkl1
	Gm9199
	Ppp1r9a
	Hspa4
	Ddx24
	Scfd2
	Tmem79
	Fam53c
	LOC100047573
	Rcn3
	Speg
	Cdk5r1
	Ppp4r1
	Mrc1
	C2cd3
	N4bp2
	Amigo2
	Gatad2b
	Rhbdf1
	Lrfn1
	Nkrf
	Crybg3
	Erbb3
	Ppp2r1b
	2007-09-05
	Slc4a3
	Ttll4
	Lfng
	Gm13315
	Pitpnm1
	2310043J07Rik
	Phb
	Armcx2
	Kctd21
	Tspan7
	Nr2f6
	Tnfsf11
	Tuba1a
	Ccdc40
	Elac2
	Polr1a
	Slc35d1
	Mpped1
	D8Ertd82e
	Pdzd4
	Zfp287
	Stk32c
	Tgm1
	Nrg1
	Cfl1
	Prex2
	Abat
	Atf7ip
	Rasip1
	Hsp90ab1
	Tcfap2e
	Grin2d
	Slc35f5
	Slco3a1
	Spsb4
	BC021767
	Rasl11a
	Hmox1
	Erc2
	Chd4
	Vcp
	Sigmar1
	Ccrn4l
	Trp53i11
	Smg7
	Mapre2
	Cmpk2
	Nfkb1
	Slc16a3
	Odc1
	Capg
	Fsd1
	Fstl3
	Pllp
	Mtap7d1
	Btbd9
	Pak3
	Syt3
	Prps2
	Gm98
	Ipo13
	Flt4
	Samd12
	Sf3a1
	Ssh2
	Sdc1
	Fam188b
	Zfp668
	Hebp2
	LOC100045923
	Rgl1
	Ston1
	Tro
	Ehd3
	Supt6h
	Cish
	Ina
	1700022P22Rik
	Trim32
	Nfatc2
	Dhx8
	Tmem45a
	6330407J23Rik
	Rnf39
	Phox2a
	Shank3
	Rhof
	Kbtbd7
	Bag4
	Plcxd2
	C77370
	Grlf1
	Hdlbp
	Rbm19
	Csrnp1
	Zic3
	Dhrs4
	Cox4i2
	Dhcr24
	Myh10
	Tiam1
	Tceal5
	Aass
	Gp1bb
	6430562O15Rik
	Slc18a1
	Jmy
	Tceal7
	Mrto4
	Ikzf4
	Slc35e3
	Sufu
	Glul
	AI413194
	Klhdc3
	Steap3
	Gnat2
	Cnnm4
	Stxbp1
	Mthfd1
	Dapk1
	Efnb3
	Zfp462
	Prpf8
	Evpl
	Rrp8
	D18Ertd653e
	Xkrx
	Pom121
	Gmpr
	Dpysl3
	Slc43a3
	Arid1a
	Dgat2
	Bai2
	Sned1
	Prssl1
	Zc4h2
	2610528E23Rik
	Slc2a1
	Tcf20
	Cd34
	Exoc8
	Bmp4
	Ccne1
	Tspan8
	LOC100045551
	Foxk1
	Sh3bp2
	Mterfd2
	Spry4
	Trio
	Rhd
	Tcea3
	Clca4
	Igfbpl1
	Mctp2
	Phldb1
	Wdfy2
	Adora2b
	Nuak2
	Slc35e1
	Fgf15
	Gcn1l1
	Spred2
	Zfp423
	E2f8
	Armc6
	A230072E10Rik
	D10Bwg1379e
	Ccdc122
	Zcchc18
	Sh3pxd2b
	Shroom4
	Sgce
	Jarid2
	Arhgdib
	Rab39b
	Tob2
	Gpr98
	Ptn
	Sh3bp5
	Ccdc3
	Spnb3
	Ppp1r10
	Dram1
	Actn4

## Sheet: BP_ALL (2i>Serum)
Category	Term	Count	%	PValue	Genes	List Total	Pop Hits	Pop Total	Fold Enrichment	Bonferroni	Benjamini	FDR
GOTERM_BP_ALL	GO:0005975~carbohydrate metabolic process	63	0.480586	1.83606e-08	GNPTG, LDHB, SEC1, GBGT1, HEXA, HEXB, OGDHL, PPIP5K1, CAR5A, ALG6, GPAT2, ITPKA, GLB1, SLC2A8, ST6GALNAC6, ST3GAL3, GLT25D2, MAN2B2, 3000002C10RIK, ST3GAL4, TRAK1, B3GALNT2, OGT, IP6K1, B3GALTL, IDUA, HYAL1, AMY1, LDHAL6B, PHKG1, PFKM, RENBP, SLC37A2, CHST8, GLB1L2, UGGT2, PHKA2, LOC100047396, ALDOC, HK1, SHPK, NAGK, HEXDC, G6PC3, UEVLD, PPP1R3B, NAGA, ENO2, GALC, IDH2, RPIA, FUT2, AI464131, GLT2…	925	454	14219	2.1331	5.45844e-05	5.45844e-05	3.30281e-05
GOTERM_BP_ALL	GO:0044262~cellular carbohydrate metabolic process	47	0.358532	5.56918e-07	PHKA2, GNPTG, LDHB, SEC1, ALDOC, OGDHL, PPIP5K1, HK1, ALG6, CAR5A, NAGK, GPAT2, ITPKA, G6PC3, SLC2A8, ST6GALNAC6, UEVLD, ST3GAL3, GLT25D2, MAN2B2, PPP1R3B, 3000002C10RIK, ST3GAL4, B3GALNT2, TRAK1, ENO2, IDH2, FUT2, RPIA, OGT, IP6K1, B3GALTL, GLT25D1, ST6GAL2, GM8615, LDHAL6B, PHKG1, GALT, PFKM, FUCA2, CPT1A, GAPDHS, AMDHD2, ATF4, RENBP, SLC37A2, UGGT2	925	327	14219	2.20942	0.00165435	0.000827517	0.00100181
GOTERM_BP_ALL	GO:0006066~alcohol metabolic process	50	0.381417	6.47614e-07	LDHB, HNF1A, CYB5R2, HPRT, OGDHL, SORL1, PPIP5K1, CAR5A, GPAT2, ITPKA, SLC2A8, MAN2B2, 3000002C10RIK, APOE, B3GALNT2, INSIG1, CAT, IP6K1, B3GALTL, LDHAL6B, PHKG1, PFKM, PNPLA7, RENBP, SLC37A2, PHKA2, CHKB, ALDOC, APOC1, HK1, NAGK, G6PC3, UEVLD, PPP1R3B, LY6E, ADH1, ENO2, SCARB1, RPIA, ST6GAL2, GM8615, GALT, NPR1, FUCA2, CPT1A, GAPDHS, AMDHD2, ATF4, FABP3, LIPC	925	360	14219	2.13498	0.0019235	0.00064158	0.00116496
GOTERM_BP_ALL	GO:0044255~cellular lipid metabolic process	60	0.457701	1.76474e-06	SLC27A1, HNF1A, ALOXE3, GBGT1, EHHADH, STAT5A, HEXA, HEXB, PIP5K1B, ECHDC2, GPAT2, ACSF2, ACOX3, GPX1, ST6GALNAC6, GLT25D2, SMPDL3A, INSIG1, ELOVL7, CAT, IP6K1, HADH, CLN3, ACADS, PIGYL, TAZ, PIGP, PNPLA3, PNPLA7, NAPEPLD, PLA2G2C, PLA2G5, HACL1, ECH1, CHKB, APOC1, ACSBG2, KIT, ALDH1A2, CEPT1, ADH1, ALDH1A3, GALC, CERK, PPAP2B, SCD1, GLT25D1, PSAP, EPHX2, CRAT, PHYH, FADS6, CPT1A, MLYCD, FABP3, P…	925	482	14219	1.91351	0.00523283	0.00131078	0.00317447
GOTERM_BP_ALL	GO:0044242~cellular lipid catabolic process	16	0.122054	1.8182e-06	HACL1, NAPEPLD, SMPDL3A, HEXA, EHHADH, HEXB, ACSBG2, GALC, PLA2G4F, PLA2G2C, LIPC, PNPLA3, PHYH, PLA2G4B, PLA2G4E, ACOX3	925	56	14219	4.39197	0.00539092	0.00108052	0.00327063
GOTERM_BP_ALL	GO:0008152~metabolic process	522	3.982	5.91637e-06	FHIT, LDHB, GBGT1, MASP2, EHHADH, PGC, BC016495, LDHD, MYLIP, CLK1, CTTNBP2, MAMSTR, PGPEP1, MAP3K8, RPL11, OGT, SDR9C7, LUC7L3, C4A, CYP1A1, RCOR3, ZSCAN4E, ZSCAN4C, NAPEPLD, F2, RPS15, MST1R, HACL1, ACSBG2, MST1, ACP5, TRPT1, NAGK, PPCDC, ATP6V0B, ZSCAN5B, HESX1, RPS27, PPP1R3B, NAGA, FAHD2A, CML1, PTGR1, RPS8, GCFC1, DMRTC2, MLYCD, HEBP1, SGSH, HNF1B, HNF1A, HTATIP2, KCNAB2, ELF4, EZH1, AOX3L1…	925	7020	14219	1.14304	0.0174356	0.00292728	0.0106422
GOTERM_BP_ALL	GO:0006629~lipid metabolic process	74	0.564498	3.01867e-05	SLC27A1, CYB5R2, HNF1A, ALOXE3, GBGT1, EHHADH, STAT5A, HEXA, HEXB, SORL1, PIP5K1B, SULT2B1, ECHDC2, GPAT2, ACSF2, ASAH1, ACOX3, GPX1, ST6GALNAC6, GLT25D2, APOE, SMPDL3A, STARD6, INSIG1, PLA1A, ELOVL7, CAT, IP6K1, HADH, CLN3, ACADS, PIGYL, TAZ, LPIN1, PIGP, PNPLA3, PNPLA7, NAPEPLD, PLA2G2C, PLA2G5, HACL1, ECH1, HSD3B7, CHKB, APOC1, ACSBG2, KIT, ALDH1A2, CEPT1, ADH1, ALDH1A3, GALC, SCARB1, CERK, PP…	925	696	14219	1.63437	0.0858371	0.0127391	0.0542878
GOTERM_BP_ALL	GO:0005996~monosaccharide metabolic process	29	0.221222	4.27546e-05	PHKA2, LDHB, ALDOC, OGDHL, HK1, CAR5A, NAGK, G6PC3, SLC2A8, UEVLD, PPP1R3B, MAN2B2, 3000002C10RIK, B3GALNT2, ENO2, RPIA, B3GALTL, ST6GAL2, LDHAL6B, GM8615, PHKG1, GALT, PFKM, FUCA2, CPT1A, GAPDHS, AMDHD2, RENBP, ATF4	925	191	14219	2.33395	0.119365	0.0157634	0.0768815
GOTERM_BP_ALL	GO:0002526~acute inflammatory response	17	0.129682	5.46208e-05	MBL2, C4A, MASP2, EPHX2, SAA3, C1S, SIGIRR, FCGR3, C8G, AHSG, C8B, GM5077, CD55, NUPR1, F2, CFH, FN1	925	81	14219	3.2262	0.149892	0.0178817	0.0982095
GOTERM_BP_ALL	GO:0065008~regulation of biological quality	106	0.808605	7.41908e-05	SLC9A8, GNA15, STAT5A, CAPZA1, KANK1, CTTNBP2, S1PR1, CDKN2A, APOE, GRIN2C, AQP11, EIF2B5, IDUA, SLC12A7, MYO6, DDIT3, SSTR5, NPC2, F2, VAMP2, LST1, MST1, ACP5, IFI30, SFPI1, AHSG, TIMP1, SLC11A1, ADRB3, ECE2, CDC42EP2, DMD, SCARB1, ENTPD2, SRGN, FN1, TESC, EPHX2, LIN7B, TNNI3, NTRK3, P2RX4, EI24, RNF6, TXNDC16, ULK1, AVPR1B, SCARA5, HNF1B, LIMA1, HNF1A, HEXA, FAM3B, HEXB, PDIA5, SYNGR1, CKB, MBP…	925	1123	14219	1.45095	0.197944	0.0218162	0.133375
GOTERM_BP_ALL	GO:0009987~cellular process	655	4.99657	7.96683e-05	FHIT, LDHB, SLC9A8, GBGT1, EHHADH, LDHD, BC016495, MYLIP, RADIL, CLK1, CTTNBP2, MAMSTR, GRIN2C, AQP11, MAP3K8, STAG3, RPL11, OGT, CCNA1, D230025D16RIK, LUC7L3, SH3GL3, CYP1A1, RCOR3, ZSCAN4E, KIF5A, ZSCAN4C, SIRPA, NAPEPLD, UNC13D, NPC2, TIMM8A2, F2, RPS15, MST1R, SLC30A10, SH3GL2, HACL1, ACSBG2, ACP5, TRPT1, NAGK, PPCDC, ATP6V0B, ZSCAN5B, HESX1, ADRB3, RPS27, PPP1R3B, RAC2, SPP1, TNNI3, PCDH19, …	925	9252	14219	1.08826	0.210901	0.0213028	0.143215
GOTERM_BP_ALL	GO:0016042~lipid catabolic process	22	0.167824	0.000145423	HACL1, HEXA, EHHADH, HEXB, ACSBG2, PNPLA3, PHYH, ACOX3, PNPLA7, NAPEPLD, SMPDL3A, APOE, GALC, PLA1A, PLA2G4F, LIPH, PLA2G2C, SCARB1, LIPC, PLA2G4B, PLA2G4E, PLA2G5	925	134	14219	2.52374	0.351032	0.0353897	0.261272
GOTERM_BP_ALL	GO:0019318~hexose metabolic process	25	0.190709	0.000241119	PHKA2, LDHB, ALDOC, OGDHL, HK1, CAR5A, G6PC3, SLC2A8, UEVLD, MAN2B2, PPP1R3B, 3000002C10RIK, ENO2, RPIA, B3GALTL, GM8615, LDHAL6B, PHKG1, GALT, PFKM, FUCA2, CPT1A, GAPDHS, RENBP, ATF4	925	169	14219	2.27395	0.511752	0.0536555	0.432852
GOTERM_BP_ALL	GO:0055114~oxidation reduction	67	0.511099	0.000475887	LDHB, STEAP4, CYB5R2, HTATIP2, ALDH1L1, KCNAB2, ALOXE3, EHHADH, LDHD, AOX3L1, PPOX, CYP2B23, CYP4F39, ACOX3, BC026585, GPX2, GPX1, UQCR10, CAT, HADH, NQO1, SDR9C7, KDM5D, ALDH6A1, CYP1A1, LDHAL6B, ACADS, CYCT, NDUFA13, CBR3, CDO1, DDO, VAT1, SCCPDH, SLC37A2, ZADH2, NDUFB4, PHYHD1, BC002163, ADHFE1, HSD3B7, MOSC2, RSAD1, RRM2B, ALDH3A2, ALDH1A2, UEVLD, ADH1, ALDH1A3, IDH2, DMGDH, SCD1, PTGR1, NDUF…	925	672	14219	1.53261	0.75711	0.0961411	0.852602
GOTERM_BP_ALL	GO:0045087~innate immune response	18	0.13731	0.000514408	IRAK1, MBL2, C4A, MASP2, NLRX1, MALT1, C1S, SIGIRR, C8G, SLC11A1, C8B, CD55, TMEM173, GM5077, NOD2, SARM1, UNC13D, CFH	925	107	14219	2.58593	0.783406	0.0969541	0.921316
GOTERM_BP_ALL	GO:0051605~protein maturation by peptide bond cleavage	13	0.0991685	0.000865814	C8B, MBL2, CD55, GM5077, ECE2, C4A, MASP2, CHST8, PSEN2, CFH, C1S, SRGN, C8G	925	65	14219	3.07438	0.92386	0.148664	1.54608
GOTERM_BP_ALL	GO:0051604~protein maturation	16	0.122054	0.00128019	AGA, MBL2, CLN3, C4A, MASP2, C1S, C8G, C8B, IMMP2L, CD55, ECE2, GM5077, PSEN2, CHST8, CFH, SRGN	925	96	14219	2.56198	0.977817	0.200705	2.278
GOTERM_BP_ALL	GO:0051234~establishment of localization	188	1.43413	0.00144299	GNPTG, SLC9A8, GM5134, SEC31B, KCNC4, ATP1B1, RFT1, SLC22A18, SLC7A9, FGF10, SLC26A11, AQP3, SLC2A8, KCNU1, CTTNBP2, SLC2A7, UQCR10, APOD, APOE, AQP11, GRIN2C, STARD6, TRAK1, RAB24, MCOLN1, D230025D16RIK, F630110N24RIK, SLC4A5, SLC12A6, SH3GL3, SLC12A7, SLC12A8, MYO6, CD3G, RINT1, ABCC10, TCN2, SIRPA, SLC34A3, PKD2L1, NPC2, RPAIN, UNC13D, SLC25A34, TIMM8A2, CATSPER2, SLC25A36, SLC37A2, RAB17, VAM…	925	2358	14219	1.22558	0.986338	0.212196	2.56417
GOTERM_BP_ALL	GO:0006810~transport	187	1.4265	0.00146861	GNPTG, SLC9A8, GM5134, SEC31B, KCNC4, ATP1B1, RFT1, SLC22A18, SLC7A9, FGF10, SLC26A11, AQP3, SLC2A8, KCNU1, CTTNBP2, SLC2A7, UQCR10, APOD, APOE, AQP11, GRIN2C, STARD6, TRAK1, RAB24, MCOLN1, D230025D16RIK, F630110N24RIK, SLC4A5, SLC12A6, SH3GL3, SLC12A7, SLC12A8, MYO6, CD3G, RINT1, ABCC10, TCN2, SIRPA, SLC34A3, PKD2L1, NPC2, RPAIN, UNC13D, SLC25A34, TIMM8A2, CATSPER2, SLC25A36, SLC37A2, RAB17, VAM…	925	2342	14219	1.22739	0.987341	0.20544	2.60912
GOTERM_BP_ALL	GO:0048518~positive regulation of biological process	126	0.961172	0.00156968	CDX1, MASP2, PDGFA, STAT5A, FGF10, PTPN22, CTTNBP2, S1PR1, CDKN2A, APOE, MDFIC, GATA4, CFH, EIF2B5, C4A, SIRPA, DDIT3, PPARGC1B, HOXD9, HES1, CD38, CD37, UNC13D, PIAS3, NFE2L2, LST1, RAG1AP1, SFPI1, RRM2B, AHSG, PLAGL1, SLC11A1, ADRB3, AHRR, RAC2, TEAD4, SCARB1, SPP1, TESC, CARD9, KLB, MAML2, ROGDI, MALT1, CD63, FCGR3, TRADD, NTRK3, POLD4, ATF4, CD55, CDKN1A, EI24, RNF6, GM5077, BMP7, BMI1, SLC27…	925	1493	14219	1.29729	0.990631	0.208255	2.78629
GOTERM_BP_ALL	GO:0000041~transition metal ion transport	13	0.0991685	0.00169695	STEAP4, FTL1, SLC39A11, SLC39A13, SFXN3, SFXN4, SFXN2, TCN2, SLC11A1, SLC39A4, SLC30A10, SCARA5, SLC31A1	925	70	14219	2.85478	0.993586	0.213721	3.00898
GOTERM_BP_ALL	GO:0051453~regulation of intracellular pH	5	0.0381417	0.00171407	SLC9A8, CLN3, SLC11A1, AQP11, CLN5	925	9	14219	8.53994	0.993905	0.20692	3.03888
GOTERM_BP_ALL	GO:0006956~complement activation	9	0.0686551	0.00182442	MBL2, C8B, GM5077, CD55, C4A, MASP2, CFH, C1S, C8G	925	36	14219	3.84297	0.995612	0.210252	3.2315
GOTERM_BP_ALL	GO:0002541~activation of plasma proteins involved in acute inflammatory response	9	0.0686551	0.00182442	MBL2, C8B, GM5077, CD55, C4A, MASP2, CFH, C1S, C8G	925	36	14219	3.84297	0.995612	0.210252	3.2315
GOTERM_BP_ALL	GO:0002684~positive regulation of immune system process	26	0.198337	0.0018839	BMI1, MBL2, MASP2, STAT5A, PTPN22, C1S, TNFRSF4, SLC11A1, NOD2, CFH, IL2RG, INPP5D, CD27, IRAK1, CARD9, C4A, MALT1, C8G, FCGR3, CD38, C8B, GM5077, CDKN1A, CD37, CD55, PSEN2	925	206	14219	1.94014	0.996325	0.208313	3.33519
GOTERM_BP_ALL	GO:0051179~localization	208	1.5867	0.00188473	SLC9A8, SEC31B, ATP1B1, RFT1, STAT5A, SLC26A11, AQP3, CTTNBP2, APOD, AQP11, GRIN2C, APOE, TRAK1, RAB24, D230025D16RIK, SH3GL3, SLC12A6, SLC12A7, SLC12A8, CD3G, RINT1, ABCC10, OPTN, SIRPA, NPC2, UNC13D, TIMM8A2, CATSPER2, RAB17, RAB12, SLC30A10, MYH7B, SH3GL2, CLCN1, BC002163, TNRC18, SFXN3, SFXN4, SFXN2, ATP6V0B, SLC11A1, SLC31A1, PLTP, HAP1, SLC28A3, OSBPL6, OSBPL7, RAB7L1, FCGR3, SYNE1, SYNE2, …	925	2659	14219	1.20246	0.996334	0.20096	3.33663
GOTERM_BP_ALL	GO:0002682~regulation of immune system process	36	0.27462	0.0019144	BMI1, MBL2, LST1, MASP2, STAT5A, MITF, PTPN22, C1S, ZEB1, PRDM16, TNFRSF4, GPX2, SLC11A1, GPX1, NOD2, CDKN2A, CFH, IL2RG, INPP5D, CD27, IRAK1, TESC, CARD9, C4A, MALT1, FCGR3, C8G, CD38, C8B, CD55, CDKN1A, GM5077, CD37, H2-OA, CD59B, PSEN2	925	322	14219	1.7186	0.996644	0.19677	3.38831
GOTERM_BP_ALL	GO:0016485~protein processing	15	0.114425	0.00191485	MBL2, CLN3, C4A, MASP2, C1S, C8G, IMMP2L, C8B, CD55, ECE2, GM5077, PSEN2, CHST8, CFH, SRGN	925	90	14219	2.56198	0.996648	0.190265	3.3891
GOTERM_BP_ALL	GO:0051188~cofactor biosynthetic process	15	0.114425	0.00213096	MOCOS, HNF1A, BC016495, NADSYN1, MTHFSD, RSAD1, PPOX, GGT1, PPCDC, MMAB, GSS, ACSS1, ISCA2, MLYCD, MYH7B	925	91	14219	2.53383	0.998239	0.202683	3.76469
GOTERM_BP_ALL	GO:0048584~positive regulation of response to stimulus	24	0.18308	0.00220078	IRAK1, MBL2, CARD9, C4A, MASP2, STAT5A, FGF10, PTPN22, MALT1, C1S, FCGR3, C8G, NTRK3, C8B, SLC11A1, CD55, NOD2, EYA1, GM5077, CDKN2A, S1PR1, PSEN2, CFH, CD27	925	186	14219	1.98347	0.99857	0.202175	3.88575
GOTERM_BP_ALL	GO:0046365~monosaccharide catabolic process	11	0.0839118	0.00223399	GAPDHS, LDHB, UEVLD, LDHAL6B, GM8615, ALDOC, OGDHL, ENO2, HK1, PFKM, RPIA	925	54	14219	3.13131	0.998705	0.198793	3.94328
GOTERM_BP_ALL	GO:0006959~humoral immune response	11	0.0839118	0.00223399	TRAF3IP2, BMI1, MBL2, C8B, GM5077, CD55, C4A, MASP2, CFH, C1S, C8G	925	54	14219	3.13131	0.998705	0.198793	3.94328
GOTERM_BP_ALL	GO:0032787~monocarboxylic acid metabolic process	31	0.236479	0.00247914	HACL1, SLC27A1, ALDH1L1, ECH1, HNF1A, ALOXE3, STAT5A, EHHADH, ACSBG2, ECHDC2, CAR5A, ACSF2, G6PC3, ACOX3, ALDH1A2, ADH1, ALDH1A3, IDH2, ELOVL7, HADH, SCD1, ACADS, EPHX2, MTHFSD, CRAT, PHYH, FADS6, CPT1A, ATF4, MLYCD, LIPC	925	268	14219	1.77809	0.999376	0.211839	4.36695
GOTERM_BP_ALL	GO:0048522~positive regulation of cellular process	112	0.854375	0.00258832	CDX1, PDGFA, STAT5A, FGF10, CTTNBP2, S1PR1, CDKN2A, APOE, MDFIC, GATA4, EIF2B5, SIRPA, DDIT3, PPARGC1B, HOXD9, HES1, CD38, UNC13D, PIAS3, NFE2L2, LST1, SFPI1, RRM2B, AHSG, PLAGL1, SLC11A1, ADRB3, AHRR, RAC2, TEAD4, SPP1, TESC, CARD9, KLB, MAML2, ROGDI, MALT1, CD63, FCGR3, TRADD, NTRK3, POLD4, ATF4, RNF6, EI24, CDKN1A, BMP7, BMI1, HNF1B, HTATIP2, HNF1A, HPRT, ELF4, MITF, ZEB1, RFXANK, ZBTB38, GPX1…	925	1320	14219	1.30428	0.999549	0.213988	4.55506
GOTERM_BP_ALL	GO:0006958~complement activation, classical pathway	8	0.0610268	0.00259976	MBL2, C8B, GM5077, CD55, C4A, MASP2, C1S, C8G	925	30	14219	4.09917	0.999565	0.20905	4.57475
GOTERM_BP_ALL	GO:0002250~adaptive immune response	14	0.106797	0.00286863	C8B, MBL2, SLC11A1, CD55, NOD2, GM5077, UNC13D, C4A, MASP2, RELB, INPP5D, C1S, FCGR3, C8G	925	84	14219	2.56198	0.999805	0.222131	5.03643
GOTERM_BP_ALL	GO:0002460~adaptive immune response based on somatic recombination of immune receptors built from immunoglobulin superfamily domains	14	0.106797	0.00286863	C8B, MBL2, SLC11A1, CD55, NOD2, GM5077, UNC13D, C4A, MASP2, RELB, INPP5D, C1S, FCGR3, C8G	925	84	14219	2.56198	0.999805	0.222131	5.03643
GOTERM_BP_ALL	GO:0046164~alcohol catabolic process	12	0.0915402	0.00289723	GAPDHS, LDHB, UEVLD, LDHAL6B, GM8615, ADH1, ALDOC, OGDHL, ENO2, HK1, PFKM, RPIA	925	65	14219	2.83789	0.999821	0.218434	5.08541
GOTERM_BP_ALL	GO:0009056~catabolic process	91	0.69418	0.00290185	LDHB, ALDH1L1, HEXA, AMT, EHHADH, HEXB, OGDHL, TRIM50, CBX4, MYLIP, RNF181, ACOX3, AUH, GPX1, GSTM4, ZYG11A, MGRN1, APOE, TPP1, SMPDL3A, GM4902, RAB24, PLA1A, FBXL12, PDE8B, PDE8A, CAT, SUCLA2, CLN3, LDHAL6B, HAL, GM6907, PFKM, CDO1, CDK5, UBE2B, PNPLA3, DNASE2A, PNPLA7, ASB8, NAALAD2, NAPEPLD, PIAS3, FBXL8, PSEN2, UBC, DDB2, UBD, FBXL4, PLA2G2C, NEURL2, PLA2G5, ZER1, UBE2T, FBXL2, HACL1, LOC1000…	925	1040	14219	1.34504	0.999823	0.213367	5.09333
GOTERM_BP_ALL	GO:0043436~oxoacid metabolic process	48	0.366161	0.00303157	HACL1, SLC27A1, HNF1A, ECH1, ALDH1L1, ALOXE3, AMT, STAT5A, EHHADH, GOT1L1, ACSBG2, ECHDC2, ASNS, CAR5A, ACSF2, G6PC3, AUH, ACOX3, ALDH1A2, ADH1, ALDH1A3, IDH2, DMGDH, ELOVL7, HADH, SCD1, CLN3, ALDH6A1, BHMT2, ST6GAL2, ACY1, ACADS, EPHX2, HAL, IDO2, MTHFSD, CRAT, PADI4, CDO1, PHYH, FADS6, DDO, PADI1, CPT1A, ATF4, MLYCD, LIPC, ADC	925	479	14219	1.5404	0.99988	0.216482	5.31519
GOTERM_BP_ALL	GO:0019752~carboxylic acid metabolic process	48	0.366161	0.00303157	HACL1, SLC27A1, HNF1A, ECH1, ALDH1L1, ALOXE3, AMT, STAT5A, EHHADH, GOT1L1, ACSBG2, ECHDC2, ASNS, CAR5A, ACSF2, G6PC3, AUH, ACOX3, ALDH1A2, ADH1, ALDH1A3, IDH2, DMGDH, ELOVL7, HADH, SCD1, CLN3, ALDH6A1, BHMT2, ST6GAL2, ACY1, ACADS, EPHX2, HAL, IDO2, MTHFSD, CRAT, PADI4, CDO1, PHYH, FADS6, DDO, PADI1, CPT1A, ATF4, MLYCD, LIPC, ADC	925	479	14219	1.5404	0.99988	0.216482	5.31519
GOTERM_BP_ALL	GO:0050776~regulation of immune response	24	0.18308	0.00309613	IRAK1, MBL2, CARD9, C4A, MASP2, STAT5A, PTPN22, MALT1, C1S, TNFRSF4, FCGR3, C8G, GPX2, C8B, GPX1, SLC11A1, CD55, NOD2, GM5077, CD37, CD59B, PSEN2, CFH, INPP5D	925	191	14219	1.93155	0.999901	0.21542	5.42541
GOTERM_BP_ALL	GO:0006082~organic acid metabolic process	48	0.366161	0.00313941	HACL1, SLC27A1, HNF1A, ECH1, ALDH1L1, ALOXE3, AMT, STAT5A, EHHADH, GOT1L1, ACSBG2, ECHDC2, ASNS, CAR5A, ACSF2, G6PC3, AUH, ACOX3, ALDH1A2, ADH1, ALDH1A3, IDH2, DMGDH, ELOVL7, HADH, SCD1, CLN3, ALDH6A1, BHMT2, ST6GAL2, ACY1, ACADS, EPHX2, HAL, IDO2, MTHFSD, CRAT, PADI4, CDO1, PHYH, FADS6, DDO, PADI1, CPT1A, ATF4, MLYCD, LIPC, ADC	925	480	14219	1.53719	0.999913	0.213133	5.49925
GOTERM_BP_ALL	GO:0002449~lymphocyte mediated immunity	13	0.0991685	0.00346284	C8B, MBL2, SLC11A1, CD55, NOD2, GM5077, UNC13D, C4A, MASP2, INPP5D, C1S, FCGR3, C8G	925	76	14219	2.6294	0.999967	0.227267	6.04928
GOTERM_BP_ALL	GO:0002253~activation of immune response	14	0.106797	0.00354048	IRAK1, MBL2, C4A, MASP2, PTPN22, MALT1, C1S, C8G, C8B, GM5077, NOD2, CD55, PSEN2, CFH	925	86	14219	2.5024	0.999974	0.226774	6.18085
GOTERM_BP_ALL	GO:0006955~immune response	47	0.358532	0.00364476	BMI1, MBL2, LST1, LOC100047396, MASP2, SUSD2, H2-D1, NLRX1, ACP5, C1S, OAS2, SLC11A1, NOD2, TMEM173, OASL1, CFH, INPP5D, CD27, CD7, IRAK1, CARD9, C4A, LY96, RELB, CD300E, H2-AB1, MALT1, ZFR2, FCGR3, SIGIRR, C8G, TRAF3IP2, OSM, C8B, CD55, GM5077, UNC13D, SARM1, H2-OA, H2-EB1, PSEN2, OAS1B, CD300LF, OAS1A, H2-T24, OAS1G, H2-T3	925	471	14219	1.53393	0.999981	0.227766	6.35732
GOTERM_BP_ALL	GO:0030004~cellular monovalent inorganic cation homeostasis	6	0.0457701	0.00367439	SLC9A8, CLN3, SLC11A1, TESC, AQP11, CLN5	925	17	14219	5.42537	0.999982	0.224707	6.4074
GOTERM_BP_ALL	GO:0009395~phospholipid catabolic process	6	0.0457701	0.00367439	NAPEPLD, SMPDL3A, PLA2G4F, PLA2G2C, PLA2G4B, PLA2G4E	925	17	14219	5.42537	0.999982	0.224707	6.4074
GOTERM_BP_ALL	GO:0010876~lipid localization	18	0.13731	0.00380008	SLC27A1, ABCA7, RFT1, HNF1A, TNRC18, OSBPL6, STAT5A, HEXA, OSBPL7, SORL1, HEXB, APOC1, NPC2, APOE, STARD6, SCARB1, LIPC, PLTP	925	128	14219	2.16167	0.999988	0.226828	6.61956
GOTERM_BP_ALL	GO:0006006~glucose metabolic process	19	0.144939	0.00419309	PHKA2, LDHB, LDHAL6B, PHKG1, ALDOC, OGDHL, HK1, CAR5A, PFKM, G6PC3, CPT1A, GAPDHS, SLC2A8, ATF4, UEVLD, PPP1R3B, 3000002C10RIK, ENO2, RPIA	925	140	14219	2.08619	0.999996	0.242405	7.28004
GOTERM_BP_ALL	GO:0050764~regulation of phagocytosis	7	0.0533984	0.00450679	MBL2, SLC11A1, NOD2, SCARB1, SIRPA, AHSG, FCGR3	925	25	14219	4.30413	0.999999	0.253182	7.80406
GOTERM_BP_ALL	GO:0006644~phospholipid metabolic process	21	0.160195	0.00451556	CLN3, CHKB, PIGYL, HEXB, TAZ, PIP5K1B, GPAT2, PIGP, PNPLA7, CEPT1, NAPEPLD, SMPDL3A, FABP3, PLA2G4F, PLA2G2C, LIPC, IP6K1, PPAP2B, PLA2G4B, PLA2G4E, PLA2G5	925	163	14219	1.98043	0.999999	0.248948	7.81868
GOTERM_BP_ALL	GO:0042180~cellular ketone metabolic process	48	0.366161	0.00487333	HACL1, SLC27A1, HNF1A, ECH1, ALDH1L1, ALOXE3, AMT, STAT5A, EHHADH, GOT1L1, ACSBG2, ECHDC2, ASNS, CAR5A, ACSF2, G6PC3, AUH, ACOX3, ALDH1A2, ADH1, ALDH1A3, IDH2, DMGDH, ELOVL7, HADH, SCD1, CLN3, ALDH6A1, BHMT2, ST6GAL2, ACY1, ACADS, EPHX2, HAL, IDO2, MTHFSD, CRAT, PADI4, CDO1, PHYH, FADS6, DDO, PADI1, CPT1A, ATF4, MLYCD, LIPC, ADC	925	491	14219	1.50275	1	0.261091	8.41281
GOTERM_BP_ALL	GO:0044275~cellular carbohydrate catabolic process	11	0.0839118	0.00495199	GAPDHS, LDHB, UEVLD, LDHAL6B, GM8615, ALDOC, OGDHL, ENO2, HK1, PFKM, RPIA	925	60	14219	2.81818	1	0.260071	8.54295
GOTERM_BP_ALL	GO:0019637~organophosphate metabolic process	22	0.167824	0.0050933	CLN3, CHKB, PIGYL, HEXB, TAZ, PIP5K1B, GPAT2, PIGP, PNPLA7, CEPT1, NAPEPLD, SMPDL3A, SLC37A2, FABP3, PLA2G4F, PLA2G2C, LIPC, IP6K1, PPAP2B, PLA2G4B, PLA2G4E, PLA2G5	925	176	14219	1.92149	1	0.26186	8.7763
GOTERM_BP_ALL	GO:0009266~response to temperature stimulus	10	0.0762835	0.00511015	OSM, ADRB3, SLC27A1, ACCN3, HSPB8, RBM3, MYOF, SCARA5, EIF2B5, 2310046K01RIK	925	51	14219	3.0141	1	0.258185	8.80409
GOTERM_BP_ALL	GO:0048583~regulation of response to stimulus	35	0.266992	0.00517874	MBL2, MASP2, STAT5A, FGF10, PTPN22, C1S, TNFRSF4, AHSG, GPX2, SLC11A1, GPX1, NOD2, CDKN2A, S1PR1, MDFIC, CFH, INPP5D, CD27, RTEL1, IRAK1, CLN3, CARD9, C4A, MALT1, FCGR3, C8G, NTRK3, C8B, CD55, EYA1, GM5077, CD37, TEX15, CD59B, PSEN2	925	330	14219	1.63035	1	0.256848	8.91713
GOTERM_BP_ALL	GO:0042592~homeostatic process	55	0.419559	0.0054128	SLC9A8, GNA15, HNF1A, STAT5A, HEXA, HEXB, PDIA5, MBP, CKB, GPX2, GPX1, S1PR1, APOE, GRIN2C, AQP11, TPP1, MT2, MT1, RTEL1, IDUA, EIF2B5, SLC12A7, CLN3, PFKM, CDK5, DNASE2A, DDIT3, SSTR5, NPC2, KLHL10, CLN5, FTL1, ACP5, SFPI1, TRIM10, TIMP1, ADRB3, SLC11A1, MTM1, CD9, PRDM14, INPP5K, DMD, SCARB1, SLC39A4, HRC, CD7, TESC, TNNI3, P2RX4, TEX15, TXNDC16, LIPC, 2700094K13RIK, SCARA5	925	584	14219	1.4477	1	0.262473	9.30184
GOTERM_BP_ALL	GO:0045807~positive regulation of endocytosis	8	0.0610268	0.00547745	MBL2, SLC11A1, NOD2, FGF10, CD63, SIRPA, AHSG, FCGR3	925	34	14219	3.61692	1	0.260952	9.40784
GOTERM_BP_ALL	GO:0030641~regulation of cellular pH	5	0.0381417	0.00575401	SLC9A8, CLN3, SLC11A1, AQP11, CLN5	925	12	14219	6.40495	1	0.267966	9.85994
GOTERM_BP_ALL	GO:0030100~regulation of endocytosis	10	0.0762835	0.00583206	MBL2, SLC11A1, NOD2, FGF10, SCARB1, CD63, SIRPA, AHSG, EPN2, FCGR3	925	52	14219	2.95613	1	0.266939	9.98715
GOTERM_BP_ALL	GO:0006007~glucose catabolic process	10	0.0762835	0.00583206	GAPDHS, LDHB, UEVLD, LDHAL6B, ALDOC, OGDHL, ENO2, HK1, PFKM, RPIA	925	52	14219	2.95613	1	0.266939	9.98715
GOTERM_BP_ALL	GO:0019320~hexose catabolic process	10	0.0762835	0.00583206	GAPDHS, LDHB, UEVLD, LDHAL6B, ALDOC, OGDHL, ENO2, HK1, PFKM, RPIA	925	52	14219	2.95613	1	0.266939	9.98715
GOTERM_BP_ALL	GO:0016052~carbohydrate catabolic process	13	0.0991685	0.0058692	LDHB, LOC100047396, GM8615, LDHAL6B, ALDOC, OGDHL, HEXB, HK1, PFKM, GAPDHS, UEVLD, ENO2, RPIA	925	81	14219	2.46709	1	0.264369	10.0476
GOTERM_BP_ALL	GO:0006040~amino sugar metabolic process	6	0.0457701	0.00619543	AMDHD2, RENBP, ST6GAL2, GM8615, B3GALNT2, NAGK	925	19	14219	4.85428	1	0.272802	10.5771
GOTERM_BP_ALL	GO:0006687~glycosphingolipid metabolic process	6	0.0457701	0.00619543	CLN3, ST6GALNAC6, HEXA, HEXB, GALC, KIT	925	19	14219	4.85428	1	0.272802	10.5771
GOTERM_BP_ALL	GO:0055085~transmembrane transport	45	0.343276	0.00636595	CLCN1, SLC9A8, SLC22A18, SLC39A11, KCNAB2, SLC39A13, SFXN3, CLCNKB, SFXN4, SLC7A9, SLC19A3, MFSD1, SFXN2, SLC26A11, ATP6V0B, AQP3, TPCN2, KCNU1, SLC2A8, SLC2A7, SCARB1, MCOLN1, 1500001M20RIK, SLC39A4, F630110N24RIK, SEC61A2, SLC12A6, TCIRG1, SLC12A7, SLC12A8, ABCC10, SLC24A6, ATP6V1H, TCN2, TRPM1, SLC17A5, CATSPER2, TIMM8A2, AU042651, SLC16A9, SLC25A36, SLC37A2, SCN8A, SLC30A10, SCARA5	925	460	14219	1.50377	1	0.27516	10.8527
GOTERM_BP_ALL	GO:0002455~humoral immune response mediated by circulating immunoglobulin	8	0.0610268	0.006471	MBL2, C8B, GM5077, CD55, C4A, MASP2, C1S, C8G	925	35	14219	3.51358	1	0.27507	11.0221
GOTERM_BP_ALL	GO:0048002~antigen processing and presentation of peptide antigen	8	0.0610268	0.006471	SLC11A1, H2-OA, H2-EB1, H2-D1, IFI30, H2-AB1, H2-T3, FCGR3	925	35	14219	3.51358	1	0.27507	11.0221
GOTERM_BP_ALL	GO:0043068~positive regulation of programmed cell death	28	0.213594	0.00650656	LST1, HTATIP2, RRM2B, GPX1, CDKN2A, CASP9, RPS3A, APOE, ALDH1A3, CASP7, PYCARD, INPP5D, CD27, LGALS12, NDUFA13, INHA, CDK5, DDIT3, FCGR3, TRADD, PLEKHF1, CDKN1A, EI24, UNC13D, NUPR1, CASP14, PSEN2, BMP7	925	250	14219	1.72165	1	0.272507	11.0794
GOTERM_BP_ALL	GO:0006096~glycolysis	9	0.0686551	0.00674973	GAPDHS, LDHB, UEVLD, LDHAL6B, ALDOC, OGDHL, ENO2, HK1, PFKM	925	44	14219	3.14425	1	0.277298	11.4701
GOTERM_BP_ALL	GO:0050778~positive regulation of immune response	18	0.13731	0.0070281	IRAK1, MBL2, CARD9, C4A, MASP2, STAT5A, PTPN22, MALT1, C1S, FCGR3, C8G, C8B, SLC11A1, CD55, GM5077, NOD2, PSEN2, CFH	925	136	14219	2.03452	1	0.283108	11.9154
GOTERM_BP_ALL	GO:0016064~immunoglobulin mediated immune response	11	0.0839118	0.00704562	MBL2, C8B, GM5077, CD55, NOD2, C4A, MASP2, C1S, INPP5D, C8G, FCGR3	925	63	14219	2.68398	1	0.279961	11.9433
GOTERM_BP_ALL	GO:0002376~immune system process	70	0.533984	0.0071098	BMI1, HPRT, MASP2, ELF4, STAT5A, MITF, SUSD2, H2-D1, PTPN22, FGF10, NOD2, TMEM173, OASL1, CFH, FGF3, IRAK1, C4A, LY96, RELB, OSTM1, ZFR2, DNASE2A, C8G, SIGIRR, OSM, C8B, UNC13D, H2-OA, PSEN2, OAS1B, CD300LF, OAS1A, OAS1G, H2-T3, MBL2, LST1, LOC100047396, IFI30, NLRX1, ACP5, SFPI1, OAS2, KIT, C1S, TRIM10, TIMP1, HSH2D, SLC11A1, NDRG1, INPP5D, SELPLG, CD27, CD7, THPO, TESC, CARD9, CD300E, ROGDI, H2…	925	791	14219	1.36034	1	0.278449	12.0456
GOTERM_BP_ALL	GO:0010942~positive regulation of cell death	28	0.213594	0.00721873	LST1, HTATIP2, RRM2B, GPX1, CDKN2A, CASP9, RPS3A, APOE, ALDH1A3, CASP7, PYCARD, INPP5D, CD27, LGALS12, NDUFA13, INHA, CDK5, DDIT3, FCGR3, TRADD, PLEKHF1, CDKN1A, EI24, UNC13D, NUPR1, CASP14, PSEN2, BMP7	925	252	14219	1.70799	1	0.278448	12.2191
GOTERM_BP_ALL	GO:0002252~immune effector process	17	0.129682	0.00755449	MBL2, CARD9, C4A, MASP2, C1S, FCGR3, C8G, TRAF3IP2, SLC11A1, C8B, CD55, GM5077, NOD2, UNC13D, CFH, INPP5D, CD27	925	126	14219	2.07399	1	0.285726	12.7516
GOTERM_BP_ALL	GO:0051452~intracellular pH reduction	4	0.0305134	0.00785376	CLN3, SLC11A1, AQP11, CLN5	925	7	14219	8.78394	1	0.291586	13.2236
GOTERM_BP_ALL	GO:0006631~fatty acid metabolic process	22	0.167824	0.00840893	SCD1, SLC27A1, HACL1, ECH1, HNF1A, ALOXE3, ACADS, EHHADH, STAT5A, EPHX2, ACSBG2, ECHDC2, CRAT, FADS6, PHYH, CPT1A, ACSF2, ACOX3, MLYCD, ELOVL7, LIPC, HADH	925	184	14219	1.83794	1	0.305003	14.093
GOTERM_BP_ALL	GO:0019724~B cell mediated immunity	11	0.0839118	0.00878301	MBL2, C8B, GM5077, CD55, NOD2, C4A, MASP2, C1S, INPP5D, C8G, FCGR3	925	65	14219	2.6014	1	0.312487	14.6741
GOTERM_BP_ALL	GO:0010941~regulation of cell death	52	0.396674	0.00990893	BMI1, HTATIP2, STAT5A, MITF, GPX1, NOD2, CDKN2A, CASP9, RPS3A, APOE, CASP7, CLN3, CD3G, SGK3, LGALS12, NDUFA13, INHA, UBE2B, CDK5, DDIT3, EYA1, UNC13D, CD59B, BTG1, PSEN2, TRAF1, LST1, 1110007C09RIK, MGMT, KIT, BDKRB2, RRM2B, TNFRSF4, TIMP1, ALDH1A3, PYCARD, INPP5D, CD27, SPP1, CARD9, BIRC7, MALT1, CARD6, FCGR3, TRADD, PLEKHF1, EI24, CDKN1A, SARM1, NUPR1, CASP14, BMP7	925	563	14219	1.41978	1	0.340971	16.4008
GOTERM_BP_ALL	GO:0007389~pattern specification process	30	0.22885	0.0105008	BMI1, HNF1B, CDX1, DYNC2LI1, FGF10, ZEB1, SEMA5A, ALDH1A2, LHX2, HOXC4, GATA4, AXIN2, PCSK6, GSC, LMX1B, OOEP, OTX1, VAX2, LEFTY1, HOXD9, HES1, HOXB4, EYA1, HOXD8, SFRP1, HOXC13, PSEN2, IFT52, BMP7, TBX18	925	284	14219	1.62379	1	0.35331	17.2953
GOTERM_BP_ALL	GO:0044248~cellular catabolic process	73	0.556869	0.0112839	ALDH1L1, HEXA, AMT, EHHADH, HEXB, CBX4, TRIM50, MYLIP, RNF181, ACOX3, AUH, GPX1, GSTM4, ZYG11A, MGRN1, APOE, TPP1, SMPDL3A, GM4902, RAB24, FBXL12, PDE8B, PDE8A, CAT, SUCLA2, CLN3, HAL, GM6907, CDO1, UBE2B, PNPLA3, CDK5, DNASE2A, ASB8, NAALAD2, NAPEPLD, FBXL8, PIAS3, PSEN2, UBC, DDB2, UBD, FBXL4, PLA2G2C, NEURL2, ZER1, UBE2T, FBXL2, HACL1, ACSBG2, OAS2, UEVLD, GALC, IDH2, DMGDH, FBXO44, ENTPD2, D1…	925	848	14219	1.32329	1	0.37008	18.4649
GOTERM_BP_ALL	GO:0051248~negative regulation of protein metabolic process	12	0.0915402	0.0117223	CLN3, CDKN2A, CD59B, INPP5K, INPP5J, GRIN2C, PSEN2, BDKRB2, CDK5, UBE2B, EIF2B5, YBX2	925	78	14219	2.36491	1	0.377327	19.1127
GOTERM_BP_ALL	GO:0006664~glycolipid metabolic process	6	0.0457701	0.0119349	CLN3, ST6GALNAC6, HEXA, HEXB, GALC, KIT	925	22	14219	4.19233	1	0.378703	19.4252
GOTERM_BP_ALL	GO:0007040~lysosome organization	6	0.0457701	0.0119349	CLN3, TPP1, HEXA, HEXB, CLN5, IDUA	925	22	14219	4.19233	1	0.378703	19.4252
GOTERM_BP_ALL	GO:0046483~heterocycle metabolic process	30	0.22885	0.0119592	MOCOS, ATP1B1, HNF1A, ALDH1L1, HPRT, STAT5A, LDHD, RSAD1, PPOX, ATP6V0B, ATP5S, GM4902, PDE8B, PDE8A, PTS, ENTPD2, D14ERTD668E, TCIRG1, ALDH6A1, PDXK, CYP1A1, HAL, GM6907, IDO2, NPR1, ATP6V1H, MTHFSD, NPR2, DGUOK, AMPD3, MMAB, HEBP1	925	287	14219	1.60682	1	0.375401	19.4608
GOTERM_BP_ALL	GO:0002443~leukocyte mediated immunity	13	0.0991685	0.012283	C8B, MBL2, SLC11A1, CD55, NOD2, GM5077, UNC13D, C4A, MASP2, INPP5D, C1S, FCGR3, C8G	925	89	14219	2.24533	1	0.379475	19.9343
GOTERM_BP_ALL	GO:0006950~response to stress	97	0.73995	0.0128963	NG23, SLC27A1, ATP1B1, HNF1A, MASP2, PDGFA, RBM3, H2-D1, FGF10, PDIA5, PTTG1, SLC2A8, GPX2, GPX1, TMEM173, NOD2, CASP9, APOE, GRIN2C, MDFIC, D17H6S56E-3, INSIG1, CREB3L2, CFH, SOX15, HSF4, CAT, NQO1, LUC7L3, RTEL1, EIF2B5, IRAK1, CLN3, POLK, C4A, ACADS, LY96, NEIL3, RINT1, NEIL2, SAA3, UBE2B, DDIT3, C8G, SIGIRR, SPDYA, OSM, C8B, EYA1, RPAIN, UNC13D, HSPB8, F2, DDB2, NFE2L2, CTSB, DMC1, PROS1, MBL…	925	1184	14219	1.25935	1	0.390274	20.8239
GOTERM_BP_ALL	GO:0031076~embryonic camera-type eye development	5	0.0381417	0.0135744	ALDH1A2, ALDH1A3, FGF10, ZEB1, BMP7	925	15	14219	5.12396	1	0.402106	21.7965
GOTERM_BP_ALL	GO:0043067~regulation of programmed cell death	51	0.389046	0.0136626	BMI1, HTATIP2, STAT5A, MITF, GPX1, NOD2, CDKN2A, CASP9, RPS3A, APOE, CASP7, CLN3, CD3G, SGK3, LGALS12, NDUFA13, INHA, UBE2B, CDK5, DDIT3, EYA1, UNC13D, BTG1, PSEN2, TRAF1, LST1, 1110007C09RIK, MGMT, KIT, BDKRB2, RRM2B, TNFRSF4, TIMP1, ALDH1A3, PYCARD, INPP5D, CD27, SPP1, CARD9, BIRC7, MALT1, CARD6, FCGR3, TRADD, PLEKHF1, EI24, CDKN1A, SARM1, NUPR1, CASP14, BMP7	925	560	14219	1.39994	1	0.400246	21.9223
GOTERM_BP_ALL	GO:0050766~positive regulation of phagocytosis	6	0.0457701	0.0144526	MBL2, SLC11A1, NOD2, SIRPA, AHSG, FCGR3	925	23	14219	4.01006	1	0.41394	23.0396
GOTERM_BP_ALL	GO:0044238~primary metabolic process	437	3.33359	0.0145724	LDHB, FHIT, GBGT1, MASP2, PGC, EHHADH, BC016495, LDHD, MYLIP, CLK1, CTTNBP2, MAMSTR, PGPEP1, MAP3K8, RPL11, OGT, LUC7L3, RCOR3, C4A, ZSCAN4E, ZSCAN4C, NAPEPLD, RPS15, F2, MST1R, HACL1, MST1, ACSBG2, TRPT1, PPCDC, NAGK, ATP6V0B, ZSCAN5B, HESX1, RPS27, PPP1R3B, NAGA, RPS8, GCFC1, DMRTC2, MLYCD, HNF1B, HNF1A, HTATIP2, ELF4, EZH1, RNF181, ASAH1, AUH, YBX2, ST6GALNAC6, MGRN1, SMPDL3A, EEF2K, FBXL12, H…	925	6211	14219	1.08155	1	0.412704	23.2077
GOTERM_BP_ALL	GO:0051186~cofactor metabolic process	21	0.160195	0.0147132	MOCOS, ALDH1L1, HNF1A, EHHADH, BC016495, NADSYN1, MTHFSD, GGT1, RSAD1, PPOX, PPCDC, MMAB, GSS, ACSS1, ISCA2, MLYCD, HEBP1, IDH2, RPIA, SUCLA2, MYH7B	925	182	14219	1.77368	1	0.411944	23.4049
GOTERM_BP_ALL	GO:0006826~iron ion transport	7	0.0533984	0.0156628	STEAP4, SLC11A1, FTL1, SFXN3, SFXN4, SFXN2, SCARA5	925	32	14219	3.3626	1	0.42807	24.722
GOTERM_BP_ALL	GO:0009408~response to heat	7	0.0533984	0.0156628	OSM, ACCN3, HSPB8, MYOF, SCARA5, EIF2B5, 2310046K01RIK	925	32	14219	3.3626	1	0.42807	24.722
GOTERM_BP_ALL	GO:0006725~cellular aromatic compound metabolic process	15	0.114425	0.0157762	MOCOS, ALDH6A1, ALDH1L1, CYP1A1, HPRT, EPHX2, IDO2, EPHX1, MTHFSD, NPR1, CLYBL, AMPD3, GSTM4, LY6E, PTS	925	114	14219	2.02262	1	0.426614	24.8779
GOTERM_BP_ALL	GO:0048871~multicellular organismal homeostasis	11	0.0839118	0.0159892	GPX2, ADRB3, SLC11A1, GPX1, PRDM14, HNF1A, TEX15, TPP1, ACP5, KLHL10, CD7	925	71	14219	2.38156	1	0.427194	25.1697
GOTERM_BP_ALL	GO:0045926~negative regulation of growth	11	0.0839118	0.0159892	MBL2, ADRB3, RNF6, NOD2, EI24, CDKN2A, ULK1, SEMA3F, NDUFA13, CAPRIN2, AHSG	925	71	14219	2.38156	1	0.427194	25.1697
GOTERM_BP_ALL	GO:0042981~regulation of apoptosis	50	0.381417	0.0164136	BMI1, HTATIP2, STAT5A, MITF, GPX1, NOD2, CDKN2A, CASP9, RPS3A, APOE, CASP7, CLN3, CD3G, SGK3, LGALS12, NDUFA13, INHA, UBE2B, CDK5, DDIT3, EYA1, UNC13D, BTG1, PSEN2, TRAF1, LST1, 1110007C09RIK, MGMT, BDKRB2, RRM2B, TNFRSF4, TIMP1, ALDH1A3, PYCARD, INPP5D, CD27, SPP1, CARD9, BIRC7, MALT1, CARD6, TRADD, FCGR3, PLEKHF1, EI24, CDKN1A, SARM1, NUPR1, CASP14, BMP7	925	553	14219	1.38986	1	0.43195	25.7482
GOTERM_BP_ALL	GO:0045851~pH reduction	4	0.0305134	0.0170886	CLN3, SLC11A1, AQP11, CLN5	925	9	14219	6.83195	1	0.441395	26.6595
GOTERM_BP_ALL	GO:0032269~negative regulation of cellular protein metabolic process	11	0.0839118	0.0175236	CLN3, CDKN2A, CD59B, INPP5K, INPP5J, PSEN2, BDKRB2, CDK5, UBE2B, EIF2B5, YBX2	925	72	14219	2.34848	1	0.445981	27.2411
GOTERM_BP_ALL	GO:0010646~regulation of cell communication	66	0.503471	0.0175815	SNCG, HNF1A, PREX1, RASGEF1A, FGF10, ZEB1, SYNGR1, GARNL3, GPX1, NOD2, S1PR1, CDKN2A, MDFIC, GRIN2C, TBC1D13, CAT, IRAK1, CLN3, RAMP2, MYO6, GSC, ARHGEF19, SIPA1L2, PFKM, CDK5, SIGIRR, OSM, SSTR5, SGSM1, PSEN2, ARFGAP3, LST1, CTNND2, KIT, PRDM16, AHSG, ADRB3, PLEKHG3, RGMA, PLEKHG1, RASGRP4, ALDH1A3, RASGRP1, INPP5D, AXIN2, PPAP2B, AFAP1, CD27, ICA1, CARD9, KLB, PSAP, MCF2, NLGN1, SIRT4, MALT1, C…	925	771	14219	1.31588	1	0.443418	27.3182
GOTERM_BP_ALL	GO:0009611~response to wounding	34	0.259364	0.0179334	MBL2, MASP2, MST1, C1S, TNFRSF4, AHSG, SLC11A1, GPX1, NOD2, ANXA8, GRIN2C, POU2F3, CFH, PYCARD, SOX15, ENTPD2, FN1, C4A, LY96, EPHX2, SAA3, FCGR3, SIGIRR, C8G, C8B, VWF, CD55, GM5077, UNC13D, NUPR1, F2, CTSB, PROS1, HDAC7	925	347	14219	1.50618	1	0.446342	27.7852
GOTERM_BP_ALL	GO:0060627~regulation of vesicle-mediated transport	12	0.0915402	0.018164	MBL2, SLC11A1, NOD2, FGF10, SCARB1, VAMP2, CD63, CDK5, SIRPA, AHSG, EPN2, FCGR3	925	83	14219	2.22244	1	0.446985	28.0896
GOTERM_BP_ALL	GO:0043065~positive regulation of apoptosis	26	0.198337	0.019243	LST1, LGALS12, NDUFA13, RRM2B, INHA, CDK5, DDIT3, FCGR3, TRADD, PLEKHF1, GPX1, EI24, UNC13D, CDKN2A, NUPR1, CASP9, APOE, RPS3A, CASP14, CASP7, ALDH1A3, PSEN2, PYCARD, INPP5D, BMP7, CD27	925	248	14219	1.61157	1	0.462674	29.4979
GOTERM_BP_ALL	GO:0006091~generation of precursor metabolites and energy	27	0.205965	0.0197359	PHKA2, NDUFB4, LDHB, BC002163, ALDOC, OGDHL, HK1, ATP6V0B, UEVLD, UQCR10, PPP1R3B, IDH2, ENO2, CAT, SUCLA2, TCIRG1, NDUFA3, LDHAL6B, GM8615, PHKG1, CYCT, NDUFA6, NDUFA13, ATP6V1H, PFKM, GAPDHS, SLC37A2	925	261	14219	1.5902	1	0.467644	30.1327
GOTERM_BP_ALL	GO:0006954~inflammatory response	24	0.18308	0.0207791	MBL2, C4A, MASP2, LY96, EPHX2, SAA3, C1S, TNFRSF4, SIGIRR, FCGR3, C8G, AHSG, C8B, SLC11A1, CD55, NOD2, GM5077, UNC13D, NUPR1, F2, PYCARD, CFH, HDAC7, FN1	925	225	14219	1.63967	1	0.481662	31.4581
GOTERM_BP_ALL	GO:0002573~myeloid leukocyte differentiation	7	0.0533984	0.0208299	RELB, MITF, PSEN2, CD300LF, SFPI1, OSTM1, KIT	925	34	14219	3.1648	1	0.478939	31.522
GOTERM_BP_ALL	GO:0009952~anterior/posterior pattern formation	18	0.13731	0.0211068	BMI1, CDX1, HNF1B, OTX1, LEFTY1, HOXD9, HES1, ALDH1A2, HOXB4, HOXD8, SFRP1, HOXC13, HOXC4, GATA4, PSEN2, AXIN2, PCSK6, TBX18	925	153	14219	1.80846	1	0.479953	31.8695
GOTERM_BP_ALL	GO:0006355~regulation of transcription, DNA-dependent	115	0.87726	0.0218806	CDX1, STAT5A, CBX4, CBX8, S1PR1, CDKN2A, MDFIC, HOXC4, GATA4, TRAK1, CREB3L2, GM4769, ZFP273, ZSCAN4E, TCFAP2A, RELB, VAX2, OBOX6, ZSCAN4C, ZFP78, DDIT3, PPARGC1B, HOXD9, HES1, TCFCP2, HOXD8, NFE2L2, NFE2L3, SFPI1, ZSCAN5B, ZFP455, PLAGL1, HESX1, SLC11A1, AHRR, 6330416L07RIK, LHX2, TEAD4, 1700048O20RIK, ZFP810, TESC, SMAD9, ZFP600, MAML2, 2210012G02RIK, HOXB4, ATF4, RNF6, EBF4, DMRTC2, C230055K05…	925	1465	14219	1.20667	1	0.488882	32.8318
GOTERM_BP_ALL	GO:0009108~coenzyme biosynthetic process	10	0.0762835	0.0218856	GSS, MOCOS, ACSS1, MLYCD, BC016495, NADSYN1, MTHFSD, GGT1, PPCDC, MYH7B	925	64	14219	2.40186	1	0.485485	32.8381
GOTERM_BP_ALL	GO:0003002~regionalization	23	0.175452	0.0220659	BMI1, CDX1, HNF1B, GSC, LMX1B, OTX1, VAX2, LEFTY1, HOXD9, HES1, ALDH1A2, HOXB4, HOXD8, SFRP1, HOXC13, HOXC4, LHX2, GATA4, PSEN2, IFT52, PCSK6, AXIN2, TBX18	925	214	14219	1.65212	1	0.484885	33.0604
GOTERM_BP_ALL	GO:0006869~lipid transport	15	0.114425	0.0221832	ABCA7, SLC27A1, RFT1, HNF1A, TNRC18, OSBPL6, OSBPL7, SORL1, APOC1, NPC2, APOE, STARD6, SCARB1, LIPC, PLTP	925	119	14219	1.93763	1	0.483319	33.2047
GOTERM_BP_ALL	GO:0044237~cellular metabolic process	411	3.13525	0.0224606	LDHB, FHIT, GBGT1, EHHADH, BC016495, LDHD, MYLIP, CLK1, CTTNBP2, MAMSTR, MAP3K8, RPL11, OGT, LUC7L3, RCOR3, CYP1A1, ZSCAN4E, ZSCAN4C, NAPEPLD, RPS15, MST1R, HACL1, ACSBG2, ACP5, TRPT1, PPCDC, NAGK, ATP6V0B, ZSCAN5B, HESX1, RPS27, PPP1R3B, RPS8, GCFC1, DMRTC2, MLYCD, HEBP1, SGSH, HNF1B, HNF1A, HTATIP2, ELF4, EZH1, RNF181, YBX2, AUH, ST6GALNAC6, MGRN1, SMPDL3A, EEF2K, FBXL12, HSF4, CLN3, EXOSC8, LD…	925	5857	14219	1.07868	1	0.484246	33.5448
GOTERM_BP_ALL	GO:0080135~regulation of cellular response to stress	11	0.0839118	0.0227776	NTRK3, CLN3, IRAK1, NOD2, EYA1, CARD9, CDKN2A, TEX15, MDFIC, CD27, RTEL1	925	75	14219	2.25454	1	0.485756	33.9314
GOTERM_BP_ALL	GO:0042693~muscle cell fate commitment	3	0.022885	0.023176	MYL2, TBX2, FGF10	925	4	14219	11.5289	1	0.488455	34.4142
GOTERM_BP_ALL	GO:0006917~induction of apoptosis	19	0.144939	0.0237585	LST1, LGALS12, NDUFA13, RRM2B, INHA, FCGR3, TRADD, PLEKHF1, GPX1, EI24, UNC13D, NUPR1, CASP9, CASP14, APOE, RPS3A, CASP7, PYCARD, CD27	925	167	14219	1.7489	1	0.493801	35.1142
GOTERM_BP_ALL	GO:0012502~induction of programmed cell death	19	0.144939	0.0237585	LST1, LGALS12, NDUFA13, RRM2B, INHA, FCGR3, TRADD, PLEKHF1, GPX1, EI24, UNC13D, NUPR1, CASP9, CASP14, APOE, RPS3A, CASP7, PYCARD, CD27	925	167	14219	1.7489	1	0.493801	35.1142
GOTERM_BP_ALL	GO:0006641~triglyceride metabolic process	7	0.0533984	0.0270423	GPX1, INSIG1, APOC1, CAT, GPAT2, LIPC, PNPLA3	925	36	14219	2.98898	1	0.536479	38.9301
GOTERM_BP_ALL	GO:0009100~glycoprotein metabolic process	17	0.129682	0.0293289	GNPTG, SGSH, CLN3, SEC1, ST6GAL2, ALG6, ST6GALNAC6, ST3GAL3, ST3GAL4, TRAK1, PSEN2, B3GALNT2, CHST8, FUT2, OGT, LIPC, UGGT2	925	147	14219	1.7777	1	0.562681	41.461
GOTERM_BP_ALL	GO:0033135~regulation of peptidyl-serine phosphorylation	4	0.0305134	0.0304539	OSM, INPP5K, INPP5J, BDKRB2	925	11	14219	5.58978	1	0.573165	42.6695
GOTERM_BP_ALL	GO:0006044~N-acetylglucosamine metabolic process	4	0.0305134	0.0304539	AMDHD2, RENBP, GM8615, NAGK	925	11	14219	5.58978	1	0.573165	42.6695
GOTERM_BP_ALL	GO:0006041~glucosamine metabolic process	4	0.0305134	0.0304539	AMDHD2, RENBP, GM8615, NAGK	925	11	14219	5.58978	1	0.573165	42.6695
GOTERM_BP_ALL	GO:0009893~positive regulation of metabolic process	58	0.442444	0.0304703	HNF1B, CDX1, HNF1A, HTATIP2, HPRT, ELF4, STAT5A, MITF, ZEB1, RFXANK, ZBTB38, NOD2, S1PR1, APOE, MDFIC, GATA4, TSIX, SOX15, HSF4, EIF2B5, HMGA1, UBE2B, PPARGC1B, CDK2, DDIT3, HES1, HOXD9, OSM, EYA1, PIAS3, NFE2L2, ABLIM1, ABLIM2, RAG1AP1, SFPI1, KIT, PRDM16, PLAGL1, ADRB3, SLC11A1, RGMA, AHRR, NPAS2, POU2F3, TEAD4, DAZL, CD27, TESC, LMX1B, MAML2, NPR1, AFF1, FCGR3, GAPDHS, ATF4, RNF6, IFT52, BMP7	925	683	14219	1.30537	1	0.570017	42.687
GOTERM_BP_ALL	GO:0050871~positive regulation of B cell activation	7	0.0533984	0.0305631	BMI1, CD38, CDKN1A, STAT5A, IL2RG, INPP5D, TNFRSF4	925	37	14219	2.9082	1	0.567824	42.7856
GOTERM_BP_ALL	GO:0030308~negative regulation of cell growth	8	0.0610268	0.0309183	RNF6, EI24, CDKN2A, ULK1, SEMA3F, NDUFA13, CAPRIN2, AHSG	925	47	14219	2.61649	1	0.568799	43.1615
GOTERM_BP_ALL	GO:0031325~positive regulation of cellular metabolic process	55	0.419559	0.0318331	HNF1B, CDX1, HTATIP2, HNF1A, HPRT, ELF4, STAT5A, MITF, ZEB1, RFXANK, ZBTB38, NOD2, S1PR1, MDFIC, APOE, GATA4, TSIX, SOX15, HSF4, EIF2B5, HMGA1, UBE2B, PPARGC1B, CDK2, DDIT3, HES1, HOXD9, OSM, EYA1, PIAS3, NFE2L2, ABLIM1, ABLIM2, SFPI1, PRDM16, PLAGL1, RGMA, SLC11A1, AHRR, NPAS2, POU2F3, TEAD4, DAZL, CD27, TESC, LMX1B, MAML2, NPR1, AFF1, FCGR3, GAPDHS, ATF4, RNF6, IFT52, BMP7	925	644	14219	1.31282	1	0.576305	44.119
GOTERM_BP_ALL	GO:0043413~biopolymer glycosylation	12	0.0915402	0.0334551	GNPTG, ST6GALNAC6, SEC1, ST3GAL3, ST6GAL2, ST3GAL4, B3GALNT2, TRAK1, ALG6, OGT, FUT2, UGGT2	925	91	14219	2.02706	1	0.591496	45.7793
GOTERM_BP_ALL	GO:0070085~glycosylation	12	0.0915402	0.0334551	GNPTG, ST6GALNAC6, SEC1, ST3GAL3, ST6GAL2, ST3GAL4, B3GALNT2, TRAK1, ALG6, OGT, FUT2, UGGT2	925	91	14219	2.02706	1	0.591496	45.7793
GOTERM_BP_ALL	GO:0006486~protein amino acid glycosylation	12	0.0915402	0.0334551	GNPTG, ST6GALNAC6, SEC1, ST3GAL3, ST6GAL2, ST3GAL4, B3GALNT2, TRAK1, ALG6, OGT, FUT2, UGGT2	925	91	14219	2.02706	1	0.591496	45.7793
GOTERM_BP_ALL	GO:0010604~positive regulation of macromolecule metabolic process	54	0.411931	0.0339202	HNF1B, CDX1, HTATIP2, HNF1A, ELF4, STAT5A, MITF, ZEB1, RFXANK, ZBTB38, NOD2, S1PR1, MDFIC, GATA4, TSIX, SOX15, HSF4, EIF2B5, HMGA1, UBE2B, PPARGC1B, CDK2, DDIT3, HES1, HOXD9, OSM, EYA1, PIAS3, NFE2L2, ABLIM1, ABLIM2, RAG1AP1, SFPI1, KIT, PRDM16, PLAGL1, RGMA, SLC11A1, AHRR, NPAS2, POU2F3, TEAD4, DAZL, CD27, TESC, LMX1B, MAML2, AFF1, FCGR3, GAPDHS, ATF4, RNF6, IFT52, BMP7	925	633	14219	1.31135	1	0.593412	46.2468
GOTERM_BP_ALL	GO:0048646~anatomical structure formation involved in morphogenesis	34	0.259364	0.0339661	HNF1B, HTATIP2, HNF1A, MYL2, PDGFA, FGF10, NEO1, HESX1, SEMA5A, RGMA, ANGPTL6, GPX1, CD9, S1PR1, ALDH1A3, CCBE1, TEAD4, AXIN2, FIGF, TLX2, TBX2, VHL, TCFAP2A, UBE2B, CDK5, NTN3, CXCL17, SFRP1, ULK1, PSEN2, IFT52, BMP7, NEURL2, TBX18	925	365	14219	1.4319	1	0.590721	46.2927
GOTERM_BP_ALL	GO:0018904~organic ether metabolic process	8	0.0610268	0.0342442	GPX1, CYP1A1, INSIG1, APOC1, CAT, GPAT2, LIPC, PNPLA3	925	48	14219	2.56198	1	0.590588	46.5701
GOTERM_BP_ALL	GO:0031400~negative regulation of protein modification process	7	0.0533984	0.0343705	CDKN2A, INPP5K, INPP5J, PSEN2, BDKRB2, CDK5, UBE2B	925	38	14219	2.83166	1	0.58882	46.6956
GOTERM_BP_ALL	GO:0051252~regulation of RNA metabolic process	115	0.87726	0.0343969	CDX1, STAT5A, CBX4, CBX8, S1PR1, CDKN2A, MDFIC, HOXC4, GATA4, TRAK1, CREB3L2, GM4769, ZFP273, ZSCAN4E, TCFAP2A, RELB, VAX2, OBOX6, ZSCAN4C, ZFP78, DDIT3, PPARGC1B, HOXD9, HES1, TCFCP2, HOXD8, NFE2L2, NFE2L3, SFPI1, ZSCAN5B, ZFP455, PLAGL1, HESX1, SLC11A1, AHRR, 6330416L07RIK, LHX2, TEAD4, 1700048O20RIK, ZFP810, TESC, SMAD9, ZFP600, MAML2, 2210012G02RIK, HOXB4, ATF4, RNF6, EBF4, DMRTC2, C230055K05…	925	1488	14219	1.18802	1	0.585997	46.7219
GOTERM_BP_ALL	GO:0016054~organic acid catabolic process	11	0.0839118	0.0365441	HACL1, AMT, EHHADH, HAL, IDO2, ACSBG2, DMGDH, CDO1, PHYH, ACOX3, AUH	925	81	14219	2.08754	1	0.605481	48.8133
GOTERM_BP_ALL	GO:0046395~carboxylic acid catabolic process	11	0.0839118	0.0365441	HACL1, AMT, EHHADH, HAL, IDO2, ACSBG2, DMGDH, CDO1, PHYH, ACOX3, AUH	925	81	14219	2.08754	1	0.605481	48.8133
GOTERM_BP_ALL	GO:0033137~negative regulation of peptidyl-serine phosphorylation	3	0.022885	0.0369754	INPP5K, INPP5J, BDKRB2	925	5	14219	9.22314	1	0.606798	49.2239
GOTERM_BP_ALL	GO:0046479~glycosphingolipid catabolic process	3	0.022885	0.0369754	HEXA, HEXB, GALC	925	5	14219	9.22314	1	0.606798	49.2239
GOTERM_BP_ALL	GO:0009636~response to toxin	6	0.0457701	0.0370391	GPX1, NUPR1, EPHX2, MT2, EPHX1, MT1	925	29	14219	3.18039	1	0.604396	49.2842
GOTERM_BP_ALL	GO:0031345~negative regulation of cell projection organization	5	0.0381417	0.0372482	RNF6, INPP5J, ULK1, SEMA3F, TLX2	925	20	14219	3.84297	1	0.603482	49.482
GOTERM_BP_ALL	GO:0007566~embryo implantation	5	0.0381417	0.0372482	OOEP, ZSCAN4E, GRN, TEAD4, MST1, ZSCAN4C	925	20	14219	3.84297	1	0.603482	49.482
GOTERM_BP_ALL	GO:0006909~phagocytosis	8	0.0610268	0.0377992	ABCA7, SLC11A1, UNC13D, SCARB1, CELA2A, SIRPA, ELMOD2, FCGR3	925	49	14219	2.5097	1	0.605978	49.9996
GOTERM_BP_ALL	GO:0006812~cation transport	45	0.343276	0.0380375	STEAP4, SLC9A8, GM5134, ATP1B1, KCNC4, FTL1, SLC39A11, KCNAB2, SLC39A13, SFXN3, SFXN4, ATP6V1G2, SFXN2, ATP6V1G1, KCNIP2, ATP6V0B, TPCN2, KCNU1, SLC11A1, ATP5S, MCOLN1, SLC39A4, SCNN1A, SLC31A1, SLC12A6, TCIRG1, SLC12A7, SLC12A8, SLC10A6, CACNG5, SLC24A6, ATP6V1H, TCN2, CDK2, SLC34A3, KCTD6, P2RX4, ACCN3, CATSPER2, PSEN2, SLC41A3, KCTD18, SCN8A, SLC30A10, SCARA5	925	515	14219	1.34318	1	0.605358	50.2219
GOTERM_BP_ALL	GO:0051129~negative regulation of cellular component organization	12	0.0915402	0.0383863	RNF6, LIMA1, S1PR1, INPP5J, ULK1, MAPT, SEMA3F, CAPZA1, UBE2B, TLX2, KANK1, MAP6D1	925	93	14219	1.98347	1	0.605827	50.5456
GOTERM_BP_ALL	GO:0048477~oogenesis	7	0.0533984	0.038471	REC8, HEXB, PAQR8, DAZL, DMC1, SOHLH2, YBX2	925	39	14219	2.75906	1	0.603728	50.6238
GOTERM_BP_ALL	GO:0046470~phosphatidylcholine metabolic process	4	0.0305134	0.0386872	PNPLA7, CHKB, FABP3, LIPC	925	12	14219	5.12396	1	0.602925	50.8232
GOTERM_BP_ALL	GO:0002920~regulation of humoral immune response	4	0.0305134	0.0386872	CD37, NOD2, CD59B, CFH	925	12	14219	5.12396	1	0.602925	50.8232
GOTERM_BP_ALL	GO:0009101~glycoprotein biosynthetic process	14	0.106797	0.0402635	GNPTG, SEC1, ST6GAL2, ALG6, ST6GALNAC6, ST3GAL3, ST3GAL4, TRAK1, B3GALNT2, CHST8, OGT, FUT2, LIPC, UGGT2	925	117	14219	1.83937	1	0.615008	52.2537
GOTERM_BP_ALL	GO:0006575~cellular amino acid derivative metabolic process	16	0.122054	0.0405477	HPRT, CHKB, STAT5A, IDO2, NPR1, GGT1, PADI4, CDO1, PADI1, PNPLA7, GSS, LY6E, FABP3, LIPC, ADC, MYH7B	925	141	14219	1.74433	1	0.614786	52.5074
GOTERM_BP_ALL	GO:0046486~glycerolipid metabolic process	15	0.114425	0.0405581	PIGYL, CHKB, TAZ, APOC1, PIP5K1B, GPAT2, PIGP, PNPLA3, PNPLA7, GPX1, INSIG1, FABP3, CAT, LIPC, IP6K1	925	129	14219	1.78743	1	0.612045	52.5167
GOTERM_BP_ALL	GO:0051100~negative regulation of binding	6	0.0457701	0.0421554	NOD2, CAT, TNFRSF4, DDIT3, SIGIRR, YBX2	925	30	14219	3.07438	1	0.623732	53.9188
GOTERM_BP_ALL	GO:0006811~ion transport	59	0.450072	0.0430196	STEAP4, SLC9A8, ATP1B1, KCNC4, GM5134, SLC22A18, KCNAB2, KCNIP2, SLC26A11, KCNU1, CTTNBP2, GRIN2C, ATP5S, MCOLN1, ANO9, SLC4A5, SLC12A6, SLC12A7, SLC12A8, GABRG3, CACNG5, ATP6V1H, SLC24A6, TCN2, CDK2, SLC34A3, PKD2L1, TRPM1, CATSPER2, PSEN2, SLC41A3, SLC30A10, CLCN1, FTL1, SLC39A11, SLC39A13, SFXN3, SFXN4, CLCNKB, ATP6V1G2, ATP6V1G1, SFXN2, ATP6V0B, TPCN2, PKD1L3, SLC11A1, SLC39A4, SCNN1A, SLC31A…	925	712	14219	1.27379	1	0.628563	54.6609
GOTERM_BP_ALL	GO:0044106~cellular amine metabolic process	25	0.190709	0.0450112	CLN3, ALDH6A1, BHMT2, ACY1, HPRT, AMT, STAT5A, CHKB, GOT1L1, HAL, GM6907, IDO2, NPR1, ASNS, PADI4, CDO1, DDO, PADI1, AUH, PNPLA7, LY6E, GM4902, FABP3, DMGDH, LIPC, ADC, D14ERTD668E	925	256	14219	1.50116	1	0.642814	56.3286
GOTERM_BP_ALL	GO:0006665~sphingolipid metabolic process	9	0.0686551	0.0464929	CLN3, ST6GALNAC6, SMPDL3A, PSAP, HEXA, HEXB, GALC, CERK, KIT	925	62	14219	2.2314	1	0.652248	57.5315
GOTERM_BP_ALL	GO:0030099~myeloid cell differentiation	12	0.0915402	0.0466988	TESC, RELB, MITF, PSEN2, CD300LF, SFPI1, OSTM1, KIT, TRIM10, DNASE2A, THPO, TIMP1	925	96	14219	1.92149	1	0.65118	57.6962
GOTERM_BP_ALL	GO:0044092~negative regulation of molecular function	15	0.114425	0.0477279	CLN3, NPB, GABBR1, TNFRSF4, DDIT3, SIGIRR, YBX2, SSTR2, CDKN1A, NOD2, S1PR1, CDKN2A, CAT, NQO1, GADD45B	925	132	14219	1.74681	1	0.656671	58.5102
GOTERM_BP_ALL	GO:0033081~regulation of T cell differentiation in the thymus	4	0.0305134	0.0479267	BMI1, CDKN2A, IL2RG, ZEB1	925	13	14219	4.72981	1	0.655545	58.6657
GOTERM_BP_ALL	GO:0046466~membrane lipid catabolic process	4	0.0305134	0.0479267	SMPDL3A, HEXA, HEXB, GALC	925	13	14219	4.72981	1	0.655545	58.6657
GOTERM_BP_ALL	GO:0030149~sphingolipid catabolic process	4	0.0305134	0.0479267	SMPDL3A, HEXA, HEXB, GALC	925	13	14219	4.72981	1	0.655545	58.6657
GOTERM_BP_ALL	GO:0045893~positive regulation of transcription, DNA-dependent	37	0.282249	0.0480059	ABLIM1, ABLIM2, HNF1B, CDX1, HNF1A, HTATIP2, ELF4, STAT5A, MITF, SFPI1, ZEB1, PRDM16, RFXANK, ZBTB38, PLAGL1, SLC11A1, NPAS2, S1PR1, MDFIC, POU2F3, GATA4, TEAD4, TSIX, SOX15, HSF4, TESC, LMX1B, MAML2, AFF1, PPARGC1B, HES1, OSM, HOXD9, ATF4, RNF6, NFE2L2, BMP7	925	416	14219	1.36721	1	0.653496	58.7275
GOTERM_BP_ALL	GO:0043433~negative regulation of transcription factor activity	5	0.0381417	0.0507865	NOD2, CAT, TNFRSF4, DDIT3, SIGIRR	925	22	14219	3.49361	1	0.672019	60.8431
GOTERM_BP_ALL	GO:0050796~regulation of insulin secretion	5	0.0381417	0.0507865	SSTR5, HNF1A, SIRT4, PFKM, CPT1A	925	22	14219	3.49361	1	0.672019	60.8431
GOTERM_BP_ALL	GO:0048878~chemical homeostasis	33	0.251735	0.0516356	SLC9A8, GNA15, FTL1, HNF1A, HEXA, HEXB, CKB, MBP, SLC11A1, CD9, S1PR1, INPP5K, APOE, GRIN2C, AQP11, MT2, MT1, SCARB1, SLC39A4, HRC, IDUA, EIF2B5, CLN3, TESC, PFKM, TNNI3, CDK5, SSTR5, P2RX4, NPC2, LIPC, SCARA5, CLN5	925	365	14219	1.38979	1	0.675621	61.4685
GOTERM_BP_ALL	GO:0051254~positive regulation of RNA metabolic process	37	0.282249	0.0522879	ABLIM1, ABLIM2, HNF1B, CDX1, HNF1A, HTATIP2, ELF4, STAT5A, MITF, SFPI1, ZEB1, PRDM16, RFXANK, ZBTB38, PLAGL1, SLC11A1, NPAS2, S1PR1, MDFIC, POU2F3, GATA4, TEAD4, TSIX, SOX15, HSF4, TESC, LMX1B, MAML2, AFF1, PPARGC1B, HES1, OSM, HOXD9, ATF4, RNF6, NFE2L2, BMP7	925	419	14219	1.35742	1	0.67773	61.9424
GOTERM_BP_ALL	GO:0019377~glycolipid catabolic process	3	0.022885	0.0531058	HEXA, HEXB, GALC	925	6	14219	7.68595	1	0.680969	62.5289
GOTERM_BP_ALL	GO:0043534~blood vessel endothelial cell migration	3	0.022885	0.0531058	GPX1, VHL, SCARB1	925	6	14219	7.68595	1	0.680969	62.5289
GOTERM_BP_ALL	GO:0030888~regulation of B cell proliferation	6	0.0457701	0.053605	BMI1, CD38, CDKN1A, CDKN2A, INPP5D, TNFRSF4	925	32	14219	2.88223	1	0.681917	62.8827
GOTERM_BP_ALL	GO:0045792~negative regulation of cell size	8	0.0610268	0.0543963	RNF6, EI24, CDKN2A, ULK1, SEMA3F, NDUFA13, CAPRIN2, AHSG	925	53	14219	2.32029	1	0.684866	63.437
GOTERM_BP_ALL	GO:0010628~positive regulation of gene expression	42	0.320391	0.0544188	ABLIM1, ABLIM2, HNF1B, CDX1, HNF1A, RAG1AP1, HTATIP2, ELF4, STAT5A, MITF, SFPI1, ZEB1, KIT, PRDM16, RFXANK, ZBTB38, PLAGL1, SLC11A1, NPAS2, S1PR1, MDFIC, POU2F3, GATA4, TEAD4, TSIX, SOX15, HSF4, TESC, LMX1B, MAML2, AFF1, HMGA1, PPARGC1B, CDK2, DDIT3, HES1, OSM, HOXD9, ATF4, RNF6, NFE2L2, BMP7	925	488	14219	1.32299	1	0.682501	63.4526
GOTERM_BP_ALL	GO:0006643~membrane lipid metabolic process	9	0.0686551	0.0544262	CLN3, ST6GALNAC6, SMPDL3A, PSAP, HEXA, HEXB, GALC, CERK, KIT	925	64	14219	2.16167	1	0.680048	63.4578
GOTERM_BP_ALL	GO:0006639~acylglycerol metabolic process	7	0.0533984	0.057897	GPX1, INSIG1, APOC1, CAT, GPAT2, LIPC, PNPLA3	925	43	14219	2.5024	1	0.700668	65.7969
GOTERM_BP_ALL	GO:0060047~heart contraction	4	0.0305134	0.0581381	GPX1, MYL2, PSEN2, TNNI3	925	14	14219	4.39197	1	0.699766	65.954
GOTERM_BP_ALL	GO:0048048~embryonic eye morphogenesis	4	0.0305134	0.0581381	ALDH1A3, VAX2, ZEB1, BMP7	925	14	14219	4.39197	1	0.699766	65.954
GOTERM_BP_ALL	GO:0003015~heart process	4	0.0305134	0.0581381	GPX1, MYL2, PSEN2, TNNI3	925	14	14219	4.39197	1	0.699766	65.954
GOTERM_BP_ALL	GO:0009062~fatty acid catabolic process	5	0.0381417	0.0584357	HACL1, EHHADH, ACSBG2, PHYH, ACOX3	925	23	14219	3.34172	1	0.699234	66.147
GOTERM_BP_ALL	GO:0002478~antigen processing and presentation of exogenous peptide antigen	5	0.0381417	0.0584357	H2-OA, H2-EB1, IFI30, H2-AB1, FCGR3	925	23	14219	3.34172	1	0.699234	66.147
GOTERM_BP_ALL	GO:0044419~interspecies interaction between organisms	5	0.0381417	0.0584357	GPX2, MBL2, GPX1, NLRX1, MST1R	925	23	14219	3.34172	1	0.699234	66.147
GOTERM_BP_ALL	GO:0001933~negative regulation of protein amino acid phosphorylation	5	0.0381417	0.0584357	INPP5K, INPP5J, PSEN2, BDKRB2, UBE2B	925	23	14219	3.34172	1	0.699234	66.147
GOTERM_BP_ALL	GO:0030301~cholesterol transport	5	0.0381417	0.0584357	NPC2, HNF1A, APOE, SCARB1, LIPC	925	23	14219	3.34172	1	0.699234	66.147
GOTERM_BP_ALL	GO:0015918~sterol transport	5	0.0381417	0.0584357	NPC2, HNF1A, APOE, SCARB1, LIPC	925	23	14219	3.34172	1	0.699234	66.147
GOTERM_BP_ALL	GO:0019725~cellular homeostasis	31	0.236479	0.0585149	SLC9A8, GNA15, FTL1, HEXA, HEXB, PDIA5, CKB, MBP, MTM1, SLC11A1, CD9, S1PR1, APOE, GRIN2C, AQP11, DMD, MT2, MT1, SLC39A4, EIF2B5, SLC12A7, CLN3, TESC, TNNI3, CDK5, DDIT3, P2RX4, TXNDC16, 2700094K13RIK, SCARA5, CLN5	925	343	14219	1.3893	1	0.69732	66.1981
GOTERM_BP_ALL	GO:0010740~positive regulation of protein kinase cascade	11	0.0839118	0.0588483	OSM, ADRB3, GPX1, NOD2, CARD9, LST1, KLB, FGF10, CAT, CD27, TRADD	925	88	14219	1.92149	1	0.697036	66.4128
GOTERM_BP_ALL	GO:0048562~embryonic organ morphogenesis	17	0.129682	0.0591366	BMI1, GSC, MYO6, OTX1, TCFAP2A, FGF10, VAX2, ZEB1, HOXD9, HESX1, HOXB4, EYA1, HOXC4, ALDH1A3, GATA4, INSIG1, BMP7	925	161	14219	1.62312	1	0.696471	66.5974
GOTERM_BP_ALL	GO:0051128~regulation of cellular component organization	30	0.22885	0.0600738	MBL2, LIMA1, LST1, CAPZA1, FGF10, KANK1, AHSG, CTTNBP2, SLC11A1, CDC42EP2, NOD2, S1PR1, INPP5J, MAPT, SEMA3F, SCARB1, TUBG1, TLX2, FN1, CD63, UBE2B, SIRPA, FCGR3, NTRK3, FMN1, RNF6, ULK1, CENPV, MAP6D1, EPN2	925	330	14219	1.39744	1	0.699963	67.1909
GOTERM_BP_ALL	GO:0051046~regulation of secretion	14	0.106797	0.0624483	SNCG, ICA1, HNF1A, SIRT4, PFKM, TNFRSF4, CDK5, CPT1A, OSM, SSTR5, NOD2, PYCARD, VAMP2, SRGN	925	125	14219	1.72165	1	0.71202	68.6503
GOTERM_BP_ALL	GO:0010324~membrane invagination	19	0.144939	0.0637169	LY75, SH3GL3, ABCA7, CLN3, MYO6, SORL1, SIRPA, FCGR3, SLC11A1, UNC13D, ULK1, AP3B2, SCARB1, CELA2A, SCARA5, ELMOD2, SH3GL2, DNM1, EPN2	925	188	14219	1.55354	1	0.71714	69.4047
GOTERM_BP_ALL	GO:0006897~endocytosis	19	0.144939	0.0637169	LY75, SH3GL3, ABCA7, CLN3, MYO6, SORL1, SIRPA, FCGR3, SLC11A1, UNC13D, ULK1, AP3B2, SCARB1, CELA2A, SCARA5, ELMOD2, SH3GL2, DNM1, EPN2	925	188	14219	1.55354	1	0.71714	69.4047
GOTERM_BP_ALL	GO:0050864~regulation of B cell activation	8	0.0610268	0.0641637	BMI1, CD38, CDKN1A, CDKN2A, STAT5A, IL2RG, INPP5D, TNFRSF4	925	55	14219	2.23591	1	0.717423	69.6662
GOTERM_BP_ALL	GO:0051321~meiotic cell cycle	11	0.0839118	0.0665607	REC8, TEX15, MAPK1IP1, SGOL1, PIWIL1, STAG3, PTTG1, TUBG1, CCNA1, DMC1, UBE2B	925	90	14219	1.87879	1	0.728643	71.0339
GOTERM_BP_ALL	GO:0019395~fatty acid oxidation	5	0.0381417	0.0666622	HACL1, EHHADH, ACSBG2, PHYH, ACOX3	925	24	14219	3.20248	1	0.726953	71.0905
GOTERM_BP_ALL	GO:0034440~lipid oxidation	5	0.0381417	0.0666622	HACL1, EHHADH, ACSBG2, PHYH, ACOX3	925	24	14219	3.20248	1	0.726953	71.0905
GOTERM_BP_ALL	GO:0007033~vacuole organization	6	0.0457701	0.0666849	CLN3, TPP1, HEXA, HEXB, CLN5, IDUA	925	34	14219	2.71269	1	0.72484	71.1031
GOTERM_BP_ALL	GO:0045935~positive regulation of nucleobase, nucleoside, nucleotide and nucleic acid metabolic process	43	0.328019	0.0667133	ABLIM1, ABLIM2, HNF1B, CDX1, HNF1A, HTATIP2, ELF4, STAT5A, MITF, SFPI1, ZEB1, PRDM16, RFXANK, ZBTB38, PLAGL1, SLC11A1, NPAS2, S1PR1, MDFIC, POU2F3, GATA4, TEAD4, TSIX, SOX15, HSF4, TESC, LMX1B, MAML2, NPR1, AFF1, UBE2B, HMGA1, CDK2, DDIT3, PPARGC1B, HES1, OSM, HOXD9, ATF4, RNF6, EYA1, NFE2L2, BMP7	925	510	14219	1.29606	1	0.722769	71.119
GOTERM_BP_ALL	GO:0033036~macromolecule localization	71	0.541613	0.0668926	GNPTG, SLC27A1, RFT1, SEC31B, HNF1A, HEXA, STAT5A, HEXB, SORL1, FGF10, SYNGR1, SYNGR2, IMMP2L, TRIM3, APOE, STARD6, GRIN2C, TRAK1, AP3B2, RAB24, D230025D16RIK, JAKMIP1, KDELR3, RAMP2, MYO6, CD3G, RINT1, OPTN, CDK5, RAB11FIP5, RPAIN, NPC2, TIMM8A2, PSEN2, RAB17, RAB12, AKAP7, MYH7B, COPZ2, ABCA7, SNX9, ARFGAP3, TNRC18, APOC1, NXT2, SLC11A1, UEVLD, AP3M2, RAB11A, DOPEY2, SCARB1, 1500001M20RIK, SRGN…	925	902	14219	1.20998	1	0.72154	71.2186
GOTERM_BP_ALL	GO:0030001~metal ion transport	38	0.289877	0.0678518	STEAP4, SLC9A8, GM5134, ATP1B1, KCNC4, FTL1, SLC39A11, KCNAB2, SLC39A13, SFXN3, SFXN4, SFXN2, KCNIP2, TPCN2, KCNU1, SLC11A1, MCOLN1, SLC39A4, SCNN1A, SLC31A1, SLC12A6, SLC12A7, SLC12A8, SLC10A6, CACNG5, SLC24A6, TCN2, CDK2, SLC34A3, KCTD6, P2RX4, ACCN3, CATSPER2, PSEN2, KCTD18, SCN8A, SLC30A10, SCARA5	925	442	14219	1.32157	1	0.724582	71.7462
GOTERM_BP_ALL	GO:0031328~positive regulation of cellular biosynthetic process	46	0.350904	0.0679161	ABLIM1, ABLIM2, HNF1B, CDX1, HNF1A, HTATIP2, ELF4, STAT5A, MITF, SFPI1, ZEB1, PRDM16, RFXANK, ZBTB38, PLAGL1, SLC11A1, NOD2, NPAS2, S1PR1, MDFIC, POU2F3, GATA4, TEAD4, TSIX, SOX15, DAZL, HSF4, CD27, EIF2B5, TESC, LMX1B, MAML2, NPR1, AFF1, HMGA1, CDK2, DDIT3, PPARGC1B, FCGR3, HES1, OSM, HOXD9, ATF4, RNF6, NFE2L2, BMP7	925	552	14219	1.28099	1	0.722743	71.7812
GOTERM_BP_ALL	GO:0050707~regulation of cytokine secretion	4	0.0305134	0.0692791	NOD2, PYCARD, TNFRSF4, SRGN	925	15	14219	4.09917	1	0.727881	72.5143
GOTERM_BP_ALL	GO:0019439~aromatic compound catabolic process	4	0.0305134	0.0692791	ALDH1L1, EPHX2, IDO2, EPHX1	925	15	14219	4.09917	1	0.727881	72.5143
GOTERM_BP_ALL	GO:0030003~cellular cation homeostasis	16	0.122054	0.0693526	SLC9A8, CLN3, GNA15, TESC, FTL1, HEXB, TNNI3, SLC11A1, S1PR1, AQP11, APOE, MT2, MT1, SLC39A4, SCARA5, CLN5	925	152	14219	1.61809	1	0.726117	72.5534
GOTERM_BP_ALL	GO:0007292~female gamete generation	8	0.0610268	0.0694209	IMMP2L, REC8, HEXB, PAQR8, DAZL, DMC1, SOHLH2, YBX2	925	56	14219	2.19598	1	0.724334	72.5896
GOTERM_BP_ALL	GO:0006638~neutral lipid metabolic process	7	0.0533984	0.0694611	GPX1, INSIG1, APOC1, CAT, GPAT2, LIPC, PNPLA3	925	45	14219	2.39118	1	0.722413	72.6109
GOTERM_BP_ALL	GO:0006662~glycerol ether metabolic process	7	0.0533984	0.0694611	GPX1, INSIG1, APOC1, CAT, GPAT2, LIPC, PNPLA3	925	45	14219	2.39118	1	0.722413	72.6109
GOTERM_BP_ALL	GO:0051173~positive regulation of nitrogen compound metabolic process	44	0.335647	0.0704761	ABLIM1, ABLIM2, HNF1B, CDX1, HNF1A, HTATIP2, HPRT, ELF4, STAT5A, MITF, SFPI1, ZEB1, PRDM16, RFXANK, ZBTB38, PLAGL1, SLC11A1, NPAS2, S1PR1, MDFIC, POU2F3, GATA4, TEAD4, TSIX, SOX15, HSF4, TESC, LMX1B, MAML2, NPR1, AFF1, UBE2B, HMGA1, PPARGC1B, CDK2, DDIT3, HES1, OSM, HOXD9, ATF4, RNF6, EYA1, NFE2L2, BMP7	925	526	14219	1.28586	1	0.725637	73.1434
GOTERM_BP_ALL	GO:0032101~regulation of response to external stimulus	12	0.0915402	0.070639	GPX2, NTRK3, CLN3, GPX1, NOD2, S1PR1, CD59B, STAT5A, CFH, FGF10, AHSG, FCGR3	925	103	14219	1.7909	1	0.724381	73.2279
GOTERM_BP_ALL	GO:0050793~regulation of developmental process	47	0.358532	0.0711859	BMI1, LST1, HTATIP2, PDGFA, STAT5A, MITF, FGF10, ZEB1, KIT, PRDM16, AHSG, CDC42EP2, CDKN2A, INPP5J, MAPT, SEMA3F, GATA4, INSIG1, SOX15, IL2RG, HSF4, INPP5D, AXIN2, TLX2, CD27, SRGN, FN1, TESC, NLGN1, LPIN1, TCL1, TRADD, HES1, NTRK3, CRHR2, RNF6, EYA1, LAMA3, BGLAP-RS1, H2-OA, SFRP1, ULK1, BTG1, ID4, NFE2L2, BMP7, HDAC7	925	568	14219	1.27197	1	0.725128	73.5099
GOTERM_BP_ALL	GO:0007043~cell-cell junction assembly	3	0.022885	0.0712066	CD9, CLDN19, HDAC7	925	7	14219	6.58795	1	0.723151	73.5205
GOTERM_BP_ALL	GO:0006882~cellular zinc ion homeostasis	3	0.022885	0.0712066	MT2, MT1, SLC39A4	925	7	14219	6.58795	1	0.723151	73.5205
GOTERM_BP_ALL	GO:0048103~somatic stem cell division	3	0.022885	0.0712066	BMI1, HOXB4, CDKN2A	925	7	14219	6.58795	1	0.723151	73.5205
GOTERM_BP_ALL	GO:0032502~developmental process	197	1.50278	0.071644	CDX1, DZIP1, STAT5A, DYNC2LI1, PTPN22, RADIL, SOHLH2, CTTNBP2, S1PR1, APOE, AQP11, INSIG1, CCBE1, CCNA1, EIF2B5, CD3G, ZSCAN4E, ZSCAN4C, HES1, REC8, CATSPER2, MST1R, CHKB, MST1, ACSBG2, ACP5, SFPI1, NRN1, AHSG, HESX1, SEMA5A, ADRB3, LHX2, DMD, SPP1, SCD1, CML1, SMAD9, ROGDI, TNNI3, TNNI1, NTRK3, RNF6, SYNE2, SEMA6C, DMRTC2, SFRP1, BMP7, STEAP4, HNF1B, HNF1A, HTATIP2, MITF, ZEB1, GJA4, ASAH1, CKB,…	925	2743	14219	1.104	1	0.723338	73.7439
GOTERM_BP_ALL	GO:0006519~cellular amino acid and derivative metabolic process	27	0.205965	0.0745228	HPRT, CHKB, STAT5A, AMT, GOT1L1, ASNS, GGT1, AUH, GSS, LY6E, DMGDH, ALDH6A1, CLN3, BHMT2, ACY1, IDO2, HAL, NPR1, PADI4, CDO1, DDO, PADI1, PNPLA7, FABP3, LIPC, ADC, MYH7B	925	297	14219	1.39744	1	0.735762	75.1706
GOTERM_BP_ALL	GO:0001558~regulation of cell growth	11	0.0839118	0.0748901	NTRK3, RNF6, EI24, CDKN2A, ULK1, MAPT, KAZALD1, SEMA3F, NDUFA13, CAPRIN2, AHSG	925	92	14219	1.83794	1	0.735532	75.3472
GOTERM_BP_ALL	GO:0009605~response to external stimulus	52	0.396674	0.0749569	NG23, MASP2, FGF10, GPX1, NOD2, D17H6S56E-3, GRIN2C, SEMA3F, GATA4, CFH, SOX15, CLN3, C4A, ACADS, LY96, SAA3, DDIT3, LEFTY1, SIGIRR, C8G, C8B, UNC13D, F2, CTSB, PROS1, TRIML2, MBL2, LST1, MST1, KIT, C1S, TNFRSF4, AHSG, SLC11A1, ANXA8, RAC2, ADH1, RASGRP4, POU2F3, PYCARD, ENTPD2, FN1, EPHX2, FCGR3, CXCL17, VWF, GM5077, CD55, ACCN3, NUPR1, CMTM7, HDAC7	925	640	14219	1.24897	1	0.733842	75.3793
GOTERM_BP_ALL	GO:0051092~positive regulation of NF-kappaB transcription factor activity	5	0.0381417	0.0754547	IRAK1, NOD2, CARD9, MALT1, CAT	925	25	14219	3.07438	1	0.734259	75.6165
GOTERM_BP_ALL	GO:0046700~heterocycle catabolic process	7	0.0533984	0.0757078	ALDH1L1, HAL, IDO2, GM6907, GM4902, PDE8B, PDE8A, ENTPD2, D14ERTD668E	925	46	14219	2.3392	1	0.733491	75.7363
GOTERM_BP_ALL	GO:0010557~positive regulation of macromolecule biosynthetic process	44	0.335647	0.0773701	ABLIM1, ABLIM2, HNF1B, CDX1, HNF1A, HTATIP2, ELF4, STAT5A, MITF, SFPI1, ZEB1, PRDM16, RFXANK, ZBTB38, PLAGL1, SLC11A1, NPAS2, S1PR1, MDFIC, POU2F3, GATA4, TEAD4, TSIX, SOX15, DAZL, HSF4, CD27, EIF2B5, TESC, LMX1B, MAML2, AFF1, HMGA1, CDK2, DDIT3, PPARGC1B, FCGR3, HES1, OSM, HOXD9, ATF4, RNF6, NFE2L2, BMP7	925	530	14219	1.27616	1	0.739456	76.5094
GOTERM_BP_ALL	GO:0045941~positive regulation of transcription	40	0.305134	0.0776773	ABLIM1, ABLIM2, HNF1B, CDX1, HNF1A, HTATIP2, ELF4, STAT5A, MITF, SFPI1, ZEB1, PRDM16, RFXANK, ZBTB38, PLAGL1, SLC11A1, NPAS2, S1PR1, MDFIC, POU2F3, GATA4, TEAD4, TSIX, SOX15, HSF4, TESC, LMX1B, MAML2, AFF1, HMGA1, CDK2, DDIT3, PPARGC1B, HES1, OSM, HOXD9, ATF4, RNF6, NFE2L2, BMP7	925	475	14219	1.29448	1	0.738939	76.6497
GOTERM_BP_ALL	GO:0009891~positive regulation of biosynthetic process	46	0.350904	0.0778763	ABLIM1, ABLIM2, HNF1B, CDX1, HNF1A, HTATIP2, ELF4, STAT5A, MITF, SFPI1, ZEB1, PRDM16, RFXANK, ZBTB38, PLAGL1, SLC11A1, NOD2, NPAS2, S1PR1, MDFIC, POU2F3, GATA4, TEAD4, TSIX, SOX15, DAZL, HSF4, CD27, EIF2B5, TESC, LMX1B, MAML2, NPR1, AFF1, HMGA1, CDK2, DDIT3, PPARGC1B, FCGR3, HES1, OSM, HOXD9, ATF4, RNF6, NFE2L2, BMP7	925	557	14219	1.26949	1	0.737919	76.7402
GOTERM_BP_ALL	GO:0016044~membrane organization	25	0.190709	0.0781482	ABCA7, SORL1, CD9, SLC11A1, AP3B2, SCARB1, ELMOD2, LY75, SH3GL3, CLN3, MYO6, A4GALT, SIRPA, FCGR3, PLEKHF1, UNC13D, SYNE2, TIMM8A2, ULK1, VAMP2, CELA2A, SCARA5, SH3GL2, DNM1, EPN2	925	272	14219	1.41286	1	0.737249	76.8632
GOTERM_BP_ALL	GO:0051049~regulation of transport	26	0.198337	0.0801584	MBL2, SNCG, CASR, ICA1, LST1, HNF1A, SIRT4, FGF10, PFKM, CD63, TNFRSF4, SIRPA, CDK5, CPT1A, FCGR3, AHSG, OSM, SSTR5, SLC11A1, NOD2, CDKN2A, PYCARD, SCARB1, VAMP2, SRGN, EPN2	925	286	14219	1.39744	1	0.744585	77.7542
GOTERM_BP_ALL	GO:0045619~regulation of lymphocyte differentiation	8	0.0610268	0.0806838	BMI1, CDKN2A, H2-OA, STAT5A, IL2RG, ZEB1, INPP5D, CD27	925	58	14219	2.12026	1	0.74505	77.9816
GOTERM_BP_ALL	GO:0030516~regulation of axon extension	4	0.0305134	0.0813005	NTRK3, RNF6, MAPT, SEMA3F	925	16	14219	3.84297	1	0.745919	78.2458
GOTERM_BP_ALL	GO:0019886~antigen processing and presentation of exogenous peptide antigen via MHC class II	4	0.0305134	0.0813005	H2-OA, H2-EB1, IFI30, H2-AB1	925	16	14219	3.84297	1	0.745919	78.2458
GOTERM_BP_ALL	GO:0046849~bone remodeling	4	0.0305134	0.0813005	HNF1A, TPP1, MITF, ACP5	925	16	14219	3.84297	1	0.745919	78.2458
GOTERM_BP_ALL	GO:0009410~response to xenobiotic stimulus	4	0.0305134	0.0813005	GPX1, AHRR, GSTM4, CYP1A1	925	16	14219	3.84297	1	0.745919	78.2458
GOTERM_BP_ALL	GO:0002495~antigen processing and presentation of peptide antigen via MHC class II	4	0.0305134	0.0813005	H2-OA, H2-EB1, IFI30, H2-AB1	925	16	14219	3.84297	1	0.745919	78.2458
GOTERM_BP_ALL	GO:0006672~ceramide metabolic process	6	0.0457701	0.081379	CLN3, ST6GALNAC6, HEXA, HEXB, GALC, CERK	925	36	14219	2.56198	1	0.744382	78.2793
GOTERM_BP_ALL	GO:0046883~regulation of hormone secretion	6	0.0457701	0.081379	OSM, SSTR5, HNF1A, SIRT4, PFKM, CPT1A	925	36	14219	2.56198	1	0.744382	78.2793
GOTERM_BP_ALL	GO:0006732~coenzyme metabolic process	15	0.114425	0.0814251	MOCOS, ALDH1L1, EHHADH, BC016495, NADSYN1, MTHFSD, GGT1, PPCDC, GSS, ACSS1, MLYCD, IDH2, RPIA, SUCLA2, MYH7B	925	143	14219	1.61244	1	0.742707	78.2988
GOTERM_BP_ALL	GO:0030258~lipid modification	7	0.0533984	0.0822624	HACL1, GBGT1, EHHADH, ACSBG2, IP6K1, PHYH, ACOX3	925	47	14219	2.28943	1	0.744563	78.6519
GOTERM_BP_ALL	GO:0010975~regulation of neuron projection development	7	0.0533984	0.0822624	NTRK3, RNF6, INPP5J, ULK1, MAPT, SEMA3F, TLX2	925	47	14219	2.28943	1	0.744563	78.6519
GOTERM_BP_ALL	GO:0043410~positive regulation of MAPKKK cascade	7	0.0533984	0.0822624	OSM, ADRB3, NOD2, CARD9, KLB, FGF10, CD27	925	47	14219	2.28943	1	0.744563	78.6519
GOTERM_BP_ALL	GO:0006873~cellular ion homeostasis	24	0.18308	0.0843885	SLC9A8, CLN3, TESC, GNA15, FTL1, HEXA, HEXB, TNNI3, CDK5, MBP, CKB, CD9, SLC11A1, P2RX4, S1PR1, APOE, AQP11, GRIN2C, MT2, MT1, SLC39A4, SCARA5, CLN5, EIF2B5	925	261	14219	1.41351	1	0.751968	79.5243
GOTERM_BP_ALL	GO:0006778~porphyrin metabolic process	5	0.0381417	0.0847984	HNF1A, HEBP1, PPOX, RSAD1, MMAB	925	26	14219	2.95613	1	0.751885	79.6886
GOTERM_BP_ALL	GO:0033013~tetrapyrrole metabolic process	5	0.0381417	0.0847984	HNF1A, HEBP1, PPOX, RSAD1, MMAB	925	26	14219	2.95613	1	0.751885	79.6886
GOTERM_BP_ALL	GO:0043392~negative regulation of DNA binding	5	0.0381417	0.0847984	NOD2, CAT, TNFRSF4, DDIT3, SIGIRR	925	26	14219	2.95613	1	0.751885	79.6886
GOTERM_BP_ALL	GO:0002791~regulation of peptide secretion	5	0.0381417	0.0847984	SSTR5, HNF1A, SIRT4, PFKM, CPT1A	925	26	14219	2.95613	1	0.751885	79.6886
GOTERM_BP_ALL	GO:0051090~regulation of transcription factor activity	8	0.0610268	0.0866883	IRAK1, NOD2, CARD9, MALT1, CAT, TNFRSF4, DDIT3, SIGIRR	925	59	14219	2.08432	1	0.758014	80.43
GOTERM_BP_ALL	GO:0051641~cellular localization	53	0.404302	0.0887821	GNPTG, CEP72, HNF1B, HTATIP2, HNF1A, FAM3B, FGF10, ARHGAP17, SYNGR1, SYNGR2, IMMP2L, APOE, TRAK1, AP3B2, MCOLN1, D230025D16RIK, KDELR3, DYNC1I1, RAMP2, MYO6, OPTN, CDK5, NPC2, RPAIN, UNC13D, TIMM8A2, SLC37A2, VAMP2, MYH7B, COPZ2, SNX9, ARFGAP3, DSCR3, SLC11A1, AP3M2, LY6E, 1500001M20RIK, CD27, SRGN, HAP1, SEC61A2, TXNIP, MYO1A, GM8615, LIN7B, NLGN1, FCGR3, TRAF3IP2, PLEKHF1, SYNE1, TEX15, SYNE2, …	925	662	14219	1.23068	1	0.764765	81.2215
GOTERM_BP_ALL	GO:0060249~anatomical structure homeostasis	10	0.0762835	0.0891217	MTM1, PRDM14, HNF1A, TEX15, TPP1, DMD, ACP5, KLHL10, RTEL1, CD7	925	83	14219	1.85204	1	0.764349	81.347
GOTERM_BP_ALL	GO:0045580~regulation of T cell differentiation	7	0.0533984	0.0891221	BMI1, CDKN2A, H2-OA, STAT5A, IL2RG, ZEB1, CD27	925	48	14219	2.24173	1	0.762579	81.3472
GOTERM_BP_ALL	GO:0048638~regulation of developmental growth	6	0.0457701	0.089319	NTRK3, RNF6, ULK1, MAPT, SEMA3F, GATA4	925	37	14219	2.49274	1	0.761604	81.4196
GOTERM_BP_ALL	GO:0006750~glutathione biosynthetic process	3	0.022885	0.0909542	GSS, GGT1, MYH7B	925	8	14219	5.76446	1	0.766336	82.0106
GOTERM_BP_ALL	GO:0055069~zinc ion homeostasis	3	0.022885	0.0909542	MT2, MT1, SLC39A4	925	8	14219	5.76446	1	0.766336	82.0106
GOTERM_BP_ALL	GO:0045579~positive regulation of B cell differentiation	3	0.022885	0.0909542	STAT5A, IL2RG, INPP5D	925	8	14219	5.76446	1	0.766336	82.0106
GOTERM_BP_ALL	GO:0050792~regulation of viral reproduction	3	0.022885	0.0909542	MDFIC, OAS1B, OAS1A	925	8	14219	5.76446	1	0.766336	82.0106
GOTERM_BP_ALL	GO:0051702~interaction with symbiont	3	0.022885	0.0909542	GPX2, MBL2, GPX1	925	8	14219	5.76446	1	0.766336	82.0106
GOTERM_BP_ALL	GO:0008361~regulation of cell size	12	0.0915402	0.0918243	NTRK3, RNF6, EI24, CDKN2A, RASGRP4, ULK1, MAPT, SEMA3F, NDUFA13, CAPRIN2, AHSG, LEFTY1	925	108	14219	1.70799	1	0.767991	82.3179
GOTERM_BP_ALL	GO:0051239~regulation of multicellular organismal process	61	0.465329	0.0939103	BMI1, SLC27A1, SNCG, HTATIP2, PDGFA, STAT5A, MITF, FGF10, ZEB1, SYNGR1, NOD2, CDKN2A, APOE, GRIN2C, MAPT, SEMA3F, GATA4, SOX15, MYO6, CDK5, SIGIRR, HES1, CRHR2, EYA1, H2-OA, BTG1, PSEN2, NFE2L2, LST1, CTNND2, PRDM16, TNFRSF4, AHSG, ADRB3, SLC11A1, INPP5J, PYCARD, IL2RG, INPP5D, AXIN2, TLX2, SRGN, CD27, HRC, TESC, ICA1, CARD9, NLGN1, TNNI3, FCGR3, TRADD, NTRK3, RNF6, LAMA3, BGLAP-RS1, SFRP1, ULK1,…	925	778	14219	1.20525	1	0.774236	83.0344
GOTERM_BP_ALL	GO:0045995~regulation of embryonic development	4	0.0305134	0.0941483	LAMA3, FGF10, NFE2L2, BMP7	925	17	14219	3.61692	1	0.773428	83.1144
GOTERM_BP_ALL	GO:0042326~negative regulation of phosphorylation	5	0.0381417	0.0946763	INPP5K, INPP5J, PSEN2, BDKRB2, UBE2B	925	27	14219	2.84665	1	0.773711	83.2905
GOTERM_BP_ALL	GO:0042311~vasodilation	5	0.0381417	0.0946763	ADRB3, P2RX4, CTTNBP2, GPX1, APOE	925	27	14219	2.84665	1	0.773711	83.2905
GOTERM_BP_ALL	GO:0055067~monovalent inorganic cation homeostasis	6	0.0457701	0.0976446	SLC9A8, CLN3, SLC11A1, TESC, AQP11, CLN5	925	38	14219	2.42714	1	0.782886	84.2491
GOTERM_BP_ALL	GO:0046519~sphingoid metabolic process	6	0.0457701	0.0976446	CLN3, ST6GALNAC6, HEXA, HEXB, GALC, CERK	925	38	14219	2.42714	1	0.782886	84.2491
GOTERM_BP_ALL	GO:0050768~negative regulation of neurogenesis	6	0.0457701	0.0976446	RNF6, ULK1, SEMA3F, ID4, BMP7, TLX2	925	38	14219	2.42714	1	0.782886	84.2491
GOTERM_BP_ALL	GO:0051130~positive regulation of cellular component organization	13	0.0991685	0.098593	FMN1, NTRK3, CTTNBP2, MBL2, SLC11A1, NOD2, LST1, MAPT, FGF10, CD63, SIRPA, FCGR3, AHSG	925	122	14219	1.63799	1	0.784606	84.5442

## Sheet: BP_ALL (Serum>2i)
Category	Term	Count	%	PValue	Genes	List Total	Pop Hits	Pop Total	Fold Enrichment	Bonferroni	Benjamini	FDR
GOTERM_BP_ALL	GO:0048731~system development	336	17.3733	3.96291e-27	DLC1, PTGS2, PDLIM7, CDX4, PGF, EDN1, PDLIM3, L1CAM, REST, CITED2, BDNF, SERPINE2, CHRNA9, CUL7, CUL1, TWIST1, INA, PHOX2A, ICOSL, ARC, RARG, PTPRF, GATM, EFNB3, TMIE, KIF5C, EFNB2, RXRG, MYH6, CTNNA1, MECOM, VASH1, BCL2L11, THY1, PLAUR, RPS19, TAGLN, JUN, MAPK3, LAMB1-1, LOC100047930, EFNA5, ADAMTS1, TGFB1I1, EXT1, DBN1, CDK5R1, ERBB3, PTH1R, DAG1, ADA, CD74, EPHB2, PFN1, TAL1, PVRL1, NUP50, BAI…	1363	2027	14219	1.72925	1.34065e-23	1.34065e-23	7.23138e-24
GOTERM_BP_ALL	GO:0048856~anatomical structure development	348	17.9938	1.7833e-25	DLC1, PTGS2, PDLIM7, CDX4, PGF, EDN1, PDLIM3, L1CAM, REST, CITED2, ACTG1, BDNF, CHRNA9, SERPINE2, CUL7, CUL1, TWIST1, INA, PHOX2A, ICOSL, ARC, RARG, PTPRF, GATM, EFNB3, TMIE, KIF5C, EFNB2, RXRG, MYH6, CTNNA1, MECOM, VASH1, BCL2L11, THY1, PLAUR, RPS19, TAGLN, JUN, MAPK3, LAMB1-1, LOC100047930, EFNA5, ADAMTS1, TGFB1I1, EXT1, BIN1, DBN1, CDK5R1, ERBB3, PTH1R, DAG1, ADA, CD74, EPHB2, PFN1, TAL1, PVRL…	1363	2170	14219	1.67299	6.03291e-22	3.01646e-22	3.25411e-22
GOTERM_BP_ALL	GO:0007275~multicellular organismal development	386	19.9586	1.41387e-24	DLC1, PTGS2, PGF, L1CAM, REST, CITED2, SERPINE2, CUL7, CUL1, INA, PHOX2A, ICOSL, ARC, GATM, PTPRF, TMIE, KIF5C, RXRG, MYH6, CTNNA1, MECOM, BCL2L11, PLAUR, THY1, RPS19, TAGLN, JUN, MAPK3, ADAMTS1, ERBB3, PTH1R, HSPA1A, HSPA1B, PFN1, PVRL1, DNMT3L, DNMT3B, LFNG, UNC45B, ODC1, DNMT3A, CLGN, PKP2, BMP8B, BMP8A, GM98, FGF5, SLC23A1, STRA8, FRAT1, SPIB, MYC, HIST1H1B, GM5506, CFTR, MMP14, FLNB, GPR98, …	1363	2521	14219	1.5973	4.78311e-21	1.59437e-21	2.57997e-21
GOTERM_BP_ALL	GO:0032502~developmental process	407	21.0445	2.43817e-23	DLC1, PTGS2, PGF, L1CAM, REST, CITED2, ACTG1, SERPINE2, CUL7, CUL1, RAB27A, INA, PHOX2A, ICOSL, ARC, GATM, PTPRF, TMIE, KIF5C, RXRG, PTPRU, MYH6, CTNNA1, MECOM, BCL2L11, PLAUR, THY1, RPS19, TAGLN, JUN, MAPK3, ADAMTS1, ERBB3, PTH1R, HSPA1A, HSPA1B, PFN1, PVRL1, DNMT3L, PVRL2, DNMT3B, LFNG, UNC45B, ODC1, DNMT3A, CLGN, RGS2, PKP2, BMP8B, BMP8A, FGF5, GM98, SLC23A1, STRA8, FRAT1, SPIB, MYC, SH3PXD2B,…	1363	2743	14219	1.5479	8.24834e-20	2.06208e-20	4.44909e-20
GOTERM_BP_ALL	GO:0007399~nervous system development	161	8.32472	9.20859e-18	DLC1, ENAH, LMO4, ARNT2, JAG2, L1CAM, CNP, REST, SLC7A5, TGFB1, CITED2, BDNF, SERPINE2, TIAM1, ROBO1, GATA3, GALR2, TWIST1, PHOX2A, EGFR, INA, IRS2, RET, C2CD3, EFNB3, PTPRF, PLXNB1, EFNB2, KIF5C, DLL3, MECOM, CTNNA1, FOXN4, THY1, SLITRK4, MIAT, PDE5A, MTAP1B, LAMB1-1, LOC100047930, EFNA5, NRSN1, SMARCA1, SLITRK5, IGSF9, DBN1, FGFR2, CDK5R1, FGFR3, ERBB3, SOX3, BEX1, TIMP2, SOX8, EPHB2, PFN1, NUP…	1363	854	14219	1.96671	3.11527e-14	6.23053e-15	1.68035e-14
GOTERM_BP_ALL	GO:0030154~cell differentiation	246	12.7198	4.6931e-16	PDLIM7, PTGS2, PGF, EDN1, L1CAM, REST, CITED2, ACTG1, BDNF, SERPINE2, CUL7, TWIST2, TWIST1, RAB27A, PHOX2A, INA, EFNB3, EFNB2, KIF5C, PTPRU, MYH6, CTNNA1, THY1, RPS19, JUN, LAMB1-1, LOC100047930, EFNA5, TGFB1I1, BIN1, DBN1, CDK5R1, ERBB3, PTH1R, HSPA1A, HSPA1B, ADA, CD74, EPHB2, TAL1, LAMB3, PVRL2, LHX6, UNC45B, TDRD1, MDFI, COL18A1, BMP4, GNAT1, KLF7, BMP1, LGALS3, CREBBP, EN1, EPHA2, KDR, GNAT2…	1363	1569	14219	1.63563	1.50235e-12	2.50355e-13	8.10463e-13
GOTERM_BP_ALL	GO:0048513~organ development	257	13.2885	6.04992e-16	DLC1, PTGS2, CDX4, PGF, EDN1, PDLIM3, CITED2, BDNF, CHRNA9, CUL7, CUL1, TWIST1, PHOX2A, ARC, RARG, GATM, TMIE, EFNB2, RXRG, MYH6, MECOM, VASH1, BCL2L11, THY1, PLAUR, RPS19, TAGLN, JUN, MAPK3, LAMB1-1, LOC100047930, ADAMTS1, TGFB1I1, EXT1, CDK5R1, ERBB3, PTH1R, DAG1, ADA, CD74, EPHB2, PFN1, TAL1, PVRL1, NUP50, PBRM1, LHX6, LFNG, UNC45B, MDFI, COL18A1, BMP4, GNAT1, ODC1, BMP1, CRIP2, SMAD7, EN1, EP…	1363	1663	14219	1.61218	1.87794e-12	2.6823e-13	1.0103e-12
GOTERM_BP_ALL	GO:0048869~cellular developmental process	253	13.0817	8.9868e-16	PDLIM7, PTGS2, PGF, EDN1, L1CAM, REST, CITED2, ACTG1, BDNF, SERPINE2, CUL7, TWIST2, TWIST1, RAB27A, PHOX2A, INA, EFNB3, EFNB2, KIF5C, PTPRU, MYH6, CTNNA1, THY1, RPS19, JUN, LAMB1-1, LOC100047930, EFNA5, TGFB1I1, BIN1, DBN1, CDK5R1, ERBB3, PTH1R, HSPA1A, HSPA1B, ADA, CD74, EPHB2, TAL1, LAMB3, PVRL2, LHX6, UNC45B, TDRD1, MDFI, COL18A1, BMP4, GNAT1, KLF7, BMP1, LGALS3, CREBBP, EN1, EPHA2, KDR, GNAT2…	1363	1636	14219	1.61328	3.00471e-12	3.75588e-13	1.62093e-12
GOTERM_BP_ALL	GO:0009653~anatomical structure morphogenesis	188	9.72079	2.65961e-15	DLC1, FGF18, ENAH, PGF, LMO4, EDN1, GNA12, CRABP2, JAG2, L1CAM, CNP, MMP2, ZIC3, TGFB1, CITED2, ACTG1, WNT4, BDNF, LOC100048295, CUL7, CHRNA9, ROBO1, GATA3, CUL1, TWIST1, EGFR, RET, RARG, C2CD3, EFNB3, GATM, TMIE, EFNB2, KIF5C, DLL3, MYH6, MECOM, CTNNA1, STK4, JUNB, VASH1, BCL2L11, PLAUR, THY1, SLITRK4, MIAT, MAPK3, LAMB1-1, ZFP697, LOC100047930, ADAMTS1, EFNA5, TGFB1I1, EXT1, SLITRK5, FRAS1, FGF…	1363	1114	14219	1.76054	9.01412e-12	1.00153e-12	4.86278e-12
GOTERM_BP_ALL	GO:0009987~cellular process	1012	52.3268	1.59166e-14	JUB, LDHA, REST, USP51, AU015228, CUL7, SERPINE2, GRIN2D, CDH24, CUL1, RAB27A, INA, ARC, ICOSL, GATM, SRP54A, KIF5C, F8, MED14, MYH6, BTBD9, LPCAT4, THY1, GLUL, TIMM8A1, AQR, TAGLN, F5, JUN, MAPK3, ROR1, ABAT, HSD11B2, CACNB2, PFN1, SULT4A1, IL17B, ARG2, GCSH, ARNTL2, LFNG, DHX8, UBE2CBP, ACACA, GAS8, EMILIN2, RGS2, 9130019O22RIK, DUSP26, PKP2, DUSP27, ARF3, PKP4, GM98, FGF5, NUAK2, FOXA3, NUAK1,…	1363	9252	14219	1.14109	5.37091e-11	5.37093e-12	2.89657e-11
GOTERM_BP_ALL	GO:0009888~tissue development	119	6.15305	1.00104e-12	DLC1, FGF18, ENAH, PTGS2, FGF15, PGF, LMO4, EDN1, PDLIM3, JAG2, TGFB1, CITED2, WNT4, LOC100048295, TWIST1, EGFR, RET, ARC, C2CD3, RARG, GATM, RXRG, DLL3, MYH6, MECOM, JUNB, PLAUR, JUN, MAPK3, TGFB1I1, EXT1, FRAS1, FGFR2, CAV2, FGFR3, PTH1R, BMPR2, DAG1, ITGB1, TIMP3, PFN1, PPL, NUP50, OVOL1, NKX3-1, PLXND1, RUNX3, OTOP1, COL18A1, BMP4, BMP1, SMAD7, CACNA1S, EPHA2, SHANK3, KDR, SALL4, RBPJ, TCF15,…	1363	638	14219	1.94581	3.38668e-09	3.0788e-10	1.82675e-09
GOTERM_BP_ALL	GO:0048519~negative regulation of biological process	197	10.1861	1.22752e-10	DLC1, SNCB, PTGS2, CDX4, EDN1, FSTL3, REST, CITED2, BDNF, CHRNA7, TWIST2, TWIST1, PLD2, RARG, RCOR2, ZHX2, SKP2, CTNNA1, VASH1, THY1, GRB10, JUN, LAMB1-1, LOC100047930, ADAMTS1, TGFB1I1, LOC100047211, ERBB3, PTH1R, HSPA1A, HSPA1B, CD74, ADA, EPHB2, PFN1, PROCR, SPNB2, SPNB1, UBASH3A, DNMT3B, TDRD1, MDFI, BMP4, IKZF4, DNMT3A, KLF12, CREBBP, NOTCH3, RGS2, JAZF1, BCL6B, RBPJ, NUAK2, NFKB1, ZEB2, GLI…	1363	1326	14219	1.54987	4.1527e-07	3.46058e-08	2.23994e-07
GOTERM_BP_ALL	GO:0022008~neurogenesis	98	5.06722	4.46484e-10	ENAH, JAG2, CNP, L1CAM, REST, TGFB1, BDNF, ROBO1, TIAM1, GALR2, TWIST1, PHOX2A, RET, EFNB3, PLXNB1, KIF5C, CTNNA1, THY1, FOXN4, SLITRK4, MIAT, LAMB1-1, MTAP1B, LOC100047930, EFNA5, SMARCA1, IGSF9, SLITRK5, CDK5R1, FGFR3, ERBB3, BEX1, TIMP2, EPHB2, LHX6, RUNX3, GNAT1, TRP53, BMP4, KLF7, BHLHE22, EN1, ITGA3, RGNEF, EPHA2, GNAT2, NOTCH3, CDKN1C, EPHA4, SEMA6A, GCM1, RBPJ, MYH10, GM98, FGF5, PAX6, GJ…	1363	537	14219	1.90382	1.51045e-06	1.16189e-07	8.14728e-07
GOTERM_BP_ALL	GO:0009887~organ morphogenesis	105	5.42916	6.36729e-10	DLC1, FGF18, ENAH, PGF, LMO4, EDN1, JAG2, MMP2, TGFB1, ZIC3, WNT4, CHRNA9, CUL1, TWIST1, EGFR, RET, C2CD3, RARG, TMIE, EFNB2, BCL2L11, THY1, MIAT, LAMB1-1, MAPK3, ADAMTS1, TGFB1I1, FRAS1, FGFR2, FGFR3, SOX3, BMPR2, DAG1, SRF, EPHB2, PFN1, PVRL1, NUP50, NKX3-1, PLXND1, RUNX3, OTOP1, GNAT1, BMP4, MDFI, BHLHE22, SMAD7, EPHA2, SHANK3, GNAT2, TNFSF11, ITGA6, CSRNP1, TCF15, PAX6, GJA1, ZEB2, PRRX2, GLI…	1363	594	14219	1.84406	2.15405e-06	1.53861e-07	1.16188e-06
GOTERM_BP_ALL	GO:0048699~generation of neurons	92	4.75698	7.73197e-10	ENAH, JAG2, PAX6, GJA1, L1CAM, CNP, REST, PTEN, GLI3, TGFB1, BDNF, METRN, SLC1A3, ROBO1, TIAM1, GALR2, NR2F6, POU4F2, RHOC, HHIP, NRG1, TUBB3, TWIST1, PHOX2A, RET, EGR2, EFNB3, MTAP2, PLXNB1, KIF5C, OTX2, STXBP1, CTNNA1, GPR98, THY1, SLIT3, FOXN4, SMO, SLITRK4, MIAT, LAMB1-1, MTAP1B, LOC100047930, EFNA5, NGFR, SMARCA1, SLITRK5, IGSF9, GAP43, CDK5R1, FGFR3, BEX1, ABI2, BRSK1, TIMP2, EPHB2, BCL2, G…	1363	497	14219	1.9311	2.61572e-06	1.74382e-07	1.4109e-06
GOTERM_BP_ALL	GO:0035295~tube development	59	3.05067	1.13248e-09	DLC1, FGF18, ENAH, PGF, LMO4, EDN1, GJA1, ZEB2, GLI3, ZIC3, TGFB1, GLI1, SPRY2, WNT4, SLC23A1, BDNF, CASP8, HHIP, TWIST1, RET, C2CD3, CFTR, MMP14, BCL2L11, MYCN, DDR1, TNS3, ACVR2B, CFL1, ZFP697, LOC100047930, ZFPM2, FGFR2, SHROOM3, DAG1, BMPR2, SRF, SUFU, ADA, PFN1, BCL2, NUP50, GBX2, NKX3-1, PLXND1, TRAF4, ETV4, BMP4, CEBPA, TBX4, FZD3, SHANK3, FZD6, KDR, ID1, PHB2, GRLF1, GDF11, PBX1	1363	264	14219	2.33142	3.83117e-06	2.39449e-07	2.06651e-06
GOTERM_BP_ALL	GO:0060429~epithelium development	60	3.10238	1.1773e-09	DLC1, ENAH, PTGS2, PGF, LMO4, PAX6, JAG2, GJA1, ZEB2, GLI3, TGFB1, WNT4, LOC100048295, CASP8, SEMA3C, TWIST1, EGFR, RET, C2CD3, RARG, MECOM, DDR1, EVPL, JUN, CFL1, TGFB1I1, FGFR2, FRAS1, SHROOM3, FGFR3, DAG1, SFN, SUFU, PFN1, BCL2, PPL, NUP50, TGM1, NKX3-1, TGM3, POU3F1, PLXND1, CAR2, ETV4, BMP4, COL18A1, PPHLN1, TBX4, FZD1, FZD3, FZD2, SHANK3, FZD6, KDR, ID1, PHB2, GRLF1, PBX1, ID3, RBPJ	1363	271	14219	2.3097	3.98278e-06	2.34282e-07	2.14829e-06
GOTERM_BP_ALL	GO:0048523~negative regulation of cellular process	176	9.10031	2.36775e-09	DLC1, SNCB, PTGS2, CDX4, RBM15B, EDN1, FSTL3, FOXO1, REST, CBX1, PNP, TGFB1, H19, CITED2, WNT4, BDNF, PACSIN1, EIF4EBP2, LOC100048295, GATA3, TWIST2, SPN, TWIST1, PLD2, RARG, ACTN4, RCOR2, PKIG, SOCS1, ZHX2, SKP2, MLXIPL, CTNNA1, PKIA, VASH1, THY1, GRB10, MTAP1A, JUN, MTAP1B, LAMB1-1, LOC100047930, TGFB1I1, CAV2, LOC100047211, FGFR3, ERBB3, PTH1R, BEX1, HSPA1A, CX3CL1, HSPA1B, TIMP2, ITGB1, ADA, …	1363	1192	14219	1.54032	8.01007e-06	4.45005e-07	4.32059e-06
GOTERM_BP_ALL	GO:0007155~cell adhesion	98	5.06722	4.78484e-09	DLC1, CTNNAL1, JUB, NELL2, L1CAM, VCL, ADAM8, SPON2, CDH24, RET, PTPRF, MPDZ, BYSL, F8, PTPRU, CTNNA1, BCL2L11, BTBD9, THY1, F5, CD34, LAMB1-1, LAMC1, MFAP4, CDK5R1, ITGB3, CX3CL1, ITGB1, PVRL4, LAMB3, PVRL1, ITGB8, TRO, TEK, PVRL2, SSX2IP, COL18A1, LPP, EFS, ITGA3, CELSR2, PCDH17, EMILIN2, ITGA9, LAMA4, CASS4, ITGA6, ITGA5, PKP2, PKP4, ITGA7, CYFIP2, NRP2, AEBP1, CLSTN3, IGFBP7, CLDN6, BCAR1, CL…	1363	561	14219	1.82237	1.6187e-05	8.51954e-07	8.73121e-06
GOTERM_BP_ALL	GO:0022610~biological adhesion	98	5.06722	5.30331e-09	DLC1, CTNNAL1, JUB, NELL2, L1CAM, VCL, ADAM8, SPON2, CDH24, RET, PTPRF, MPDZ, BYSL, F8, PTPRU, CTNNA1, BCL2L11, BTBD9, THY1, F5, CD34, LAMB1-1, LAMC1, MFAP4, CDK5R1, ITGB3, CX3CL1, ITGB1, PVRL4, LAMB3, PVRL1, ITGB8, TRO, TEK, PVRL2, SSX2IP, COL18A1, LPP, EFS, ITGA3, CELSR2, PCDH17, EMILIN2, ITGA9, LAMA4, CASS4, ITGA6, ITGA5, PKP2, PKP4, ITGA7, CYFIP2, NRP2, AEBP1, CLSTN3, IGFBP7, CLDN6, BCAR1, CL…	1363	562	14219	1.81913	1.79409e-05	8.97054e-07	9.67729e-06
GOTERM_BP_ALL	GO:0048646~anatomical structure formation involved in morphogenesis	71	3.67115	1.05548e-08	DLC1, FGF18, ENAH, PGF, LMO4, EDN1, ZEB2, ANPEP, PTEN, MMP2, GLI3, CITED2, ACTG1, WNT4, HMOX1, GATA3, CASP8, GNPAT, TGFA, SOX18, TWIST1, CYR61, RET, EGR2, DLL3, MYH6, MMP14, JUNB, VASH1, BCL2L11, THY1, BBS2, CFL1, ADAMTS1, FGFR2, SHROOM3, BMPR2, EGLN1, CX3CL1, SRF, ITGB1, ADA, SUFU, PFN1, NUP50, GBX2, POU2F1, NKX3-1, PLCD1, SKIL, PLXND1, BMP4, COL18A1, TRP53, TBX4, FZD3, CAPN2, CACNA1S, EPHA2, SH…	1363	365	14219	2.02926	3.57064e-05	1.70033e-06	1.92601e-05
GOTERM_BP_ALL	GO:0030182~neuron differentiation	74	3.82627	3.98961e-08	ENAH, JAG2, PAX6, L1CAM, CNP, PTEN, GLI3, BDNF, SLC1A3, ROBO1, GALR2, NR2F6, POU4F2, NRG1, TUBB3, PHOX2A, RET, EGR2, EFNB3, MTAP2, OTX2, KIF5C, STXBP1, GPR98, THY1, SLIT3, FOXN4, SMO, SLITRK4, MIAT, LAMB1-1, MTAP1B, LOC100047930, EFNA5, NGFR, SMARCA1, SLITRK5, IGSF9, GAP43, CDK5R1, FGFR3, ABI2, BRSK1, EPHB2, BCL2, GBX2, ETV1, LHX6, ETV4, RUNX3, DCLK1, BMP4, GNAT1, KLK8, KLF7, BHLHE22, PTPRZ1, NFA…	1363	399	14219	1.93478	0.000134959	6.13492e-06	7.2801e-05
GOTERM_BP_ALL	GO:0035239~tube morphogenesis	41	2.11996	7.17546e-08	FGFR2, DLC1, ENAH, SHROOM3, PGF, LMO4, EDN1, DAG1, GJA1, ZEB2, GLI3, SRF, ZIC3, SUFU, TGFB1, SPRY2, PFN1, WNT4, BCL2, NUP50, CASP8, GBX2, NKX3-1, PLXND1, ETV4, TWIST1, BMP4, RET, C2CD3, FZD3, MMP14, BCL2L11, SHANK3, FZD6, KDR, MYCN, DDR1, PHB2, CFL1, GRLF1, PBX1	1363	171	14219	2.50127	0.000242716	1.05541e-05	0.000130935
GOTERM_BP_ALL	GO:0007507~heart development	48	2.4819	1.60744e-07	DLC1, NRP2, FGF15, ERBB3, EDN1, PDLIM3, SOX4, GJA1, EGLN1, GLI3, TPM1, ITGB1, PTEN, SRF, SUFU, ZIC3, CITED2, MSX2, CHD7, CASP8, NKX3-1, SEMA3C, PBRM1, NRG1, COL11A1, NOX4, BMP4, C2CD3, SMAD7, HSPG2, MYH6, MECOM, COL5A1, SMO, ACVR2B, SALL4, ID2, PKP2, ID1, ZMIZ1, ZFP697, ZFPM2, EPOR, ADAMTS1, ID3, RBPJ, HDAC9, MYH10	1363	223	14219	2.24548	0.00054365	2.2658e-05	0.00029332
GOTERM_BP_ALL	GO:0048468~cell development	99	5.11892	1.86026e-07	FGF18, ENAH, FGF15, EDN1, CNP, L1CAM, TGFB1, ACTG1, BDNF, WNT4, LOC100048295, ROBO1, DDX25, GALR2, RET, EFNB3, KIF5C, MYH6, THY1, SLITRK4, MIAT, LAMB1-1, MTAP1B, LOC100047930, EFNA5, IGSF9, SLITRK5, CAV2, HMGB2, CDK5R1, PTH1R, ITGB1, SOX8, EPHB2, PVRL2, LHX6, TDRD1, RUNX3, GNAT1, COL18A1, BMP4, KLF7, CREBBP, EN1, RGNEF, CACNA1S, EPHA2, KDR, GNAT2, CDKN1C, EPHA4, SEMA6A, RBPJ, MYH10, NRP2, GM98, P…	1363	611	14219	1.69031	0.000629127	2.51727e-05	0.000339453
GOTERM_BP_ALL	GO:0009790~embryonic development	106	5.48087	2.16444e-07	DLC1, ENAH, LMO4, ARNT2, CRABP2, GNA12, EDN1, JAG2, DLK1, CITED2, TOP1, WNT4, CHRNA9, TWIST1, EGFR, RET, C2CD3, RARG, GATM, TMIE, DLL3, MYH6, MECOM, JUNB, BCL2L11, ZFP697, TGFB1I1, EXT1, FGFR2, CDK5R1, BMPR2, ITGB1, SOX8, SRF, ADA, PFN1, ECE1, NUP50, DNMT3L, NKX3-1, SKIL, DNMT3B, OTOP1, TRP53, BMP4, MDFI, DNMT3A, EN1, EPHA2, SHANK3, GCM1, SALL4, SFRP2, TCF15, MYH10, PAX6, GJA1, ZEB2, PRRX2, LSR, …	1363	670	14219	1.65046	0.000731961	2.81623e-05	0.000394958
GOTERM_BP_ALL	GO:0050793~regulation of developmental process	93	4.80869	2.83625e-07	GM98, FGF18, PGF, GNA12, PAX6, GJA1, REST, PNP, GLI3, TGFB1, GLI1, BDNF, WNT4, METRN, PLEKHB1, CUL7, TIAM1, POU4F2, RHOC, NRG1, TWIST2, TWIST1, SH3PXD2B, ZFP36, EGR2, PTGER4, FOXJ1, PLXNB1, CTNNA1, VASH2, JUNB, BCL2L11, VASH1, THY1, SMO, TCFL5, LCK, BMP2K, SPNA1, ADAMTS1, WNT9A, TGFB1I1, NGFR, AKAP2, CALCR, FGFR2, FGFR3, SHROOM3, ADORA2B, BEX1, CX3CL1, TIMP2, SRF, ITGB1, CD74, ADA, EPHB2, TAL1, B…	1363	568	14219	1.70808	0.000959044	3.55366e-05	0.000517548
GOTERM_BP_ALL	GO:0002009~morphogenesis of an epithelium	40	2.06825	2.93399e-07	FRAS1, FGFR2, DLC1, ENAH, SHROOM3, FGFR3, PGF, LMO4, DAG1, JAG2, ZEB2, GLI3, TGFB1, SUFU, PFN1, WNT4, BCL2, NUP50, CASP8, NKX3-1, SEMA3C, PLXND1, CAR2, ETV4, TWIST1, BMP4, EGFR, RET, RARG, C2CD3, TBX4, FZD3, SHANK3, FZD6, DDR1, PHB2, CFL1, GRLF1, PBX1, TGFB1I1	1363	173	14219	2.41205	0.000992075	3.54482e-05	0.000535382
GOTERM_BP_ALL	GO:0048666~neuron development	57	2.94726	3.13128e-07	ENAH, PAX6, L1CAM, CNP, GLI3, PTEN, BDNF, SLC1A3, ROBO1, GALR2, NR2F6, POU4F2, RET, EGR2, EFNB3, MTAP2, KIF5C, STXBP1, GPR98, THY1, SLIT3, SLITRK4, MIAT, MTAP1B, LAMB1-1, LOC100047930, EFNA5, NGFR, IGSF9, SLITRK5, GAP43, CDK5R1, ABI2, EPHB2, BCL2, GBX2, ETV1, LHX6, ETV4, RUNX3, DCLK1, GNAT1, KLF7, KLK8, PTPRZ1, NFASC, EN1, LMX1A, RGNEF, GNAT2, CDKN1C, SEMA6A, EPHA4, PPP1R9A, PHGDH, PBX3, MYH10	1363	292	14219	2.03641	0.00105875	3.65274e-05	0.000571384
GOTERM_BP_ALL	GO:0048522~positive regulation of cellular process	181	9.35884	3.31932e-07	FGF18, S100A6, FGF15, PGF, FGF17, EDN1, ARNT2, TLR2, FOXO1, EIF5A, TLR3, L1CAM, PNP, ZIC3, TGFB1, CTNNBL1, CITED2, BDNF, LOC100048295, TIAM1, GATA3, GPR44, SPN, RAB27A, EGFR, IRS2, ICOSL, RARG, ACTN4, PLXNB1, SKP2, MLXIPL, RXRG, MED14, TCFAP2E, MECOM, CTNNA1, VASH2, JUNB, BCL2L11, THY1, TNS3, ZFP462, JUN, LAMB1-1, CDCA7L, SMARCA1, FGFR2, HMGB2, CDK5R1, FGFR3, ADORA2B, PTH1R, ST8SIA1, BEX1, BMPR2,…	1363	1320	14219	1.43047	0.00112229	3.74301e-05	0.000605695
GOTERM_BP_ALL	GO:0042127~regulation of cell proliferation	89	4.60186	3.39785e-07	DLC1, FGF5, FGF18, E2F3, FOSL2, FGF15, PTGS2, E2F7, FGF17, EDN1, PAX6, JAG2, FOXO1, PRRX2, PTEN, PNP, GLI3, TGFB1, GLI1, H19, SPRY2, BDNF, HMOX1, GATA3, TGFA, MYC, LTB, SPN, EGFR, ICOSL, IRS2, RARG, FOXJ1, RASIP1, MECOM, CTNNA1, VASH2, VASH1, MYCN, SMO, TNS3, DDR1, TCFL5, CCND2, ZMIZ1, JUN, HIPK2, LOC100047930, CDCA7L, NGFR, FGFR2, CAV2, FGFR3, PTH1R, ST8SIA1, BEX1, CNTFR, SFN, TIMP2, ITGB1, ADA,…	1363	538	14219	1.72576	0.00114883	3.70797e-05	0.000620025
GOTERM_BP_ALL	GO:0006928~cell motion	67	3.46432	3.41908e-07	NRP2, JUB, ENAH, FGF15, BCAR1, PAX6, GJA1, ZEB2, L1CAM, PTEN, GLI3, TGFB1, BDNF, ROBO1, RSPH4A, SEMA3C, POU4F2, CHRNA7, NRG1, TWIST1, EGFR, RET, EGR2, EFNB3, FOXJ1, KIF5C, MMP14, SLIT3, SMO, TNS3, CD34, CFL1, EFNA5, LAMC1, NGFR, GAP43, CDK5R1, ABI2, DNAHC11, CX3CL1, SRF, ITGB1, EPHB2, IL17B, GBX2, ETV1, LHX6, ETV4, RUNX3, DCLK1, KLF7, VAV3, PODXL, ATP1A3, NFASC, ITGA3, LMX1A, GAS8, KDR, SEMA6A, E…	1363	367	14219	1.9045	0.00115601	3.61454e-05	0.000623899
GOTERM_BP_ALL	GO:0048729~tissue morphogenesis	49	2.53361	4.75016e-07	FRAS1, DLC1, FGFR2, ENAH, SHROOM3, FGFR3, PGF, LMO4, DAG1, BMPR2, JAG2, ZEB2, EGLN1, GLI3, TPM1, SUFU, TGFB1, PFN1, WNT4, BCL2, NUP50, CASP8, NKX3-1, SEMA3C, PLXND1, COL11A1, CAR2, ETV4, RUNX3, TWIST1, BMP4, EGFR, RET, C2CD3, RARG, SMAD7, TBX4, FZD3, EPHA2, SHANK3, FZD6, DDR1, PHB2, CFL1, GRLF1, PBX1, NGFR, TGFB1I1, WNT7A	1363	238	14219	2.14779	0.00160569	4.86952e-05	0.000866789
GOTERM_BP_ALL	GO:0007242~intracellular signaling cascade	133	6.87694	7.44862e-07	CTNNAL1, ADCY1, ADCY2, ADCY7, FGF14, THOP1, EDN1, GNA12, ADCY6, RASGEF1B, RRAD, FGF13, RGL1, DIRAS1, EIF4EBP2, TIAM1, GPR44, SPRED2, RAPGEF5, SPRED3, RAPGEF4, RAB25, ERAS, SPRED1, RAB27A, RET, RARG, SOCS1, PSD3, RXRG, TNS3, PLCE1, RND1, REM2, RAB15, RAB13, SPATA13, LRRK1, FGFR3, ADORA2B, PTH1R, AKAP13, RIMS2, CD74, PLCH2, ARHGDIA, TEC, GNAT1, TRP53, MDFI, CNKSR2, CNKSR1, GPR155, VAV3, RASEF, TRIO…	1363	915	14219	1.51636	0.0025167	7.4111e-05	0.00135919
GOTERM_BP_ALL	GO:0001944~vasculature development	50	2.58532	8.77618e-07	FGF18, PGF, CDX4, EDN1, GJA1, FOXO1, ANPEP, PRRX2, MMP2, PTEN, CITED2, LOC100048295, CUL7, HMOX1, CASP8, TGFA, SEMA3C, SOX18, CYR61, EFNB2, MMP14, JUNB, VASH1, THY1, SMO, ZMIZ1, ZFP697, ZFPM2, FGFR2, CX3CL1, SRF, CHD7, GBX2, PLCD1, PLXND1, COL18A1, BMP4, SMAD7, TBX4, COL5A1, EPHA2, KDR, ANXA2, DLX3, LAMA4, ID1, ECSCR, ITGA7, HBEGF, RBPJ	1363	250	14219	2.08643	0.00296458	8.48245e-05	0.00160143
GOTERM_BP_ALL	GO:0007167~enzyme linked receptor protein signaling pathway	53	2.74043	1.02085e-06	FGF18, FGF5, LTBP1, FGF15, BCAR1, FGF17, FOXO1, CLNK, PTEN, TGFB1, EIF4EBP2, TIAM1, TGFA, GHR, EGFR, IRS2, RET, EFNB3, STXBP4, PTPRN, FLNA, DDR1, GRB10, ACVR2B, HIPK2, ROR1, AKAP2, FGFR2, FGFR3, ERBB3, BEX1, BMPR2, EPHB2, MSX2, SPNB2, TEK, SKIL, BMP4, TRP53, SMAD7, SMAD6, FLT4, EPHA1, EPHA2, KDR, EPHA4, ID1, CSRNP1, HBEGF, PTPN1, BMP8B, BMP6, BMP8A	1363	273	14219	2.02529	0.0034476	9.59274e-05	0.0018628
GOTERM_BP_ALL	GO:0031175~neuron projection development	45	2.32678	1.38216e-06	CDK5R1, ENAH, PAX6, ABI2, L1CAM, CNP, GLI3, PTEN, EPHB2, BDNF, ROBO1, BCL2, GALR2, GBX2, POU4F2, ETV1, ETV4, DCLK1, RUNX3, KLK8, KLF7, EGR2, EFNB3, MTAP2, PTPRZ1, KIF5C, STXBP1, NFASC, LMX1A, RGNEF, SLIT3, SEMA6A, EPHA4, PPP1R9A, SLITRK4, LAMB1-1, MTAP1B, PHGDH, LOC100047930, EFNA5, NGFR, IGSF9, SLITRK5, GAP43, MYH10	1363	218	14219	2.15342	0.00466493	0.000126366	0.00252208
GOTERM_BP_ALL	GO:0009792~embryonic development ending in birth or egg hatching	72	3.72285	2.13764e-06	DLC1, ENAH, LMO4, ARNT2, GNA12, EDN1, PAX6, GJA1, ZEB2, DLK1, PRRX2, GLI3, CITED2, ANKRD11, CASP8, COL11A1, TWIST1, CYR61, EGFR, C2CD3, GM5506, DLL3, MYH6, MECOM, JUNB, BCL2L11, SMO, ZMIZ1, CFL1, ZFPM2, WNT9A, FGFR2, SHROOM3, EGLN1, SRF, SOX8, TPM1, ITGB1, ADA, SUFU, PFN1, CHD7, ECE1, NUP50, DNMT3L, GBX2, NKX3-1, APBA2, ETNK2, PLCD1, SKIL, ACSL4, ENO1, BMP4, MDFI, CEBPA, TRP53, HSPG2, EN1, FZD3, …	1363	425	14219	1.76733	0.00720555	0.000190288	0.00390061
GOTERM_BP_ALL	GO:0001568~blood vessel development	48	2.4819	2.42143e-06	FGFR2, FGF18, CDX4, PGF, EDN1, GJA1, FOXO1, ANPEP, CX3CL1, PRRX2, SRF, MMP2, PTEN, CITED2, LOC100048295, CHD7, CUL7, HMOX1, CASP8, GBX2, SEMA3C, TGFA, SOX18, PLCD1, PLXND1, CYR61, COL18A1, BMP4, SMAD7, TBX4, MMP14, JUNB, EPHA2, COL5A1, VASH1, KDR, THY1, ANXA2, DLX3, SMO, LAMA4, ZMIZ1, ITGA7, ECSCR, ZFP697, HBEGF, ZFPM2, RBPJ	1363	244	14219	2.05222	0.00815824	0.000210022	0.00441844
GOTERM_BP_ALL	GO:0030030~cell projection organization	58	2.99897	2.64242e-06	JUB, ENAH, PAX6, L1CAM, CNP, GLI3, PTEN, VCL, BDNF, ROBO1, GALR2, POU4F2, TUBB4, C2CD3, EGR2, EFNB3, FOXJ1, MTAP2, KIF5C, STXBP1, GPR98, SLIT3, BBS2, SLITRK4, PRDX6, CFL1, MTAP1B, LAMB1-1, LOC100047930, EFNA5, NGFR, IGSF9, SLITRK5, GAP43, CDK5R1, ABI2, EPHB2, BCL2, GBX2, ETV1, ETV4, RUNX3, DCLK1, KLF7, KLK8, VAV3, PTPRZ1, NFASC, LMX1A, RGNEF, SEMA6A, EPHA4, CORO1A, PPP1R9A, ITGA6, CAPG, PHGDH, MY…	1363	319	14219	1.89675	0.00889947	0.000223458	0.00482168
GOTERM_BP_ALL	GO:0043009~chordate embryonic development	71	3.67115	2.99324e-06	DLC1, ENAH, LMO4, ARNT2, GNA12, EDN1, PAX6, GJA1, ZEB2, DLK1, PRRX2, GLI3, CITED2, ANKRD11, CASP8, COL11A1, TWIST1, CYR61, EGFR, C2CD3, GM5506, DLL3, MYH6, MECOM, JUNB, BCL2L11, SMO, ZMIZ1, CFL1, ZFPM2, WNT9A, FGFR2, SHROOM3, EGLN1, SRF, SOX8, TPM1, ITGB1, ADA, SUFU, PFN1, CHD7, ECE1, NUP50, DNMT3L, GBX2, NKX3-1, APBA2, ETNK2, PLCD1, SKIL, ENO1, BMP4, MDFI, CEBPA, TRP53, HSPG2, EN1, FZD3, CAPN2, …	1363	421	14219	1.75934	0.010075	0.000246948	0.00546181
GOTERM_BP_ALL	GO:0006357~regulation of transcription from RNA polymerase II promoter	95	4.9121	3.07244e-06	RAI1, FOXK1, CDX4, NR6A1, ARNT2, PAX6, FOXO1, NFKB1, TGFB1, ZIC3, CITED2, GLI1, KCNIP3, LOC100048295, LBH, GATA3, PAX8, POU4F2, FOSL1, MYC, TWIST2, ATF7IP, EGR2, RARG, FOXJ1, SOX11, PKIG, OTX2, ZHX2, MLXIPL, RXRG, TLE4, MED14, TLE1, IRF2BP1, TCFAP2E, MECOM, PKIA, JMY, SMO, ZFP462, JUN, ZMIZ1, HIPK2, ZFPM2, LCOR, SUPT6H, HMGB2, MTDH, UBE3A, SOX4, SOX7, SRF, ARID2, SOX8, SUFU, PFN1, TAL1, NPAS1, TC…	1363	616	14219	1.60885	0.0103403	0.000247448	0.00560634
GOTERM_BP_ALL	GO:0030029~actin filament-based process	38	1.96484	3.47499e-06	DLC1, ENAH, LOC100047211, SHROOM3, PDLIM7, SHROOM4, NUAK2, BCAR1, PDLIM3, FHL3, ITGB1, SRF, ESPN, ACTG1, PFN1, ARHGAP6, PRR5, MYL6B, FAT1, BCL2, CNN2, CNN1, ARHGAP8, EHD2, FMNL2, ACTN4, FOXJ1, ARHGEF17, MYH6, FLNC, FLNA, PPP1R9A, CORO1A, LIMCH1, CFL1, MYH14, DBN1, AKAP2, MYH10	1363	176	14219	2.25239	0.0116871	0.000273356	0.00634084
GOTERM_BP_ALL	GO:0007411~axon guidance	26	1.34436	3.81615e-06	ENAH, CDK5R1, PAX6, L1CAM, GLI3, EPHB2, BDNF, ROBO1, GBX2, POU4F2, ETV1, ETV4, RUNX3, KLF7, EGR2, EFNB3, KIF5C, NFASC, LMX1A, SLIT3, EPHA4, SEMA6A, EFNA5, NGFR, GAP43, MYH10	1363	98	14219	2.76771	0.0128271	0.000293367	0.00696334
GOTERM_BP_ALL	GO:0010646~regulation of cell communication	113	5.84281	3.89309e-06	FGF18, EDN1, FSTL3, RASGEF1B, TLR3, L1CAM, RGL1, CITED2, SYP, BDNF, WNT4, TIAM1, GPR44, SPRED2, RAPGEF5, SPRED3, CHRNA7, RAPGEF4, SPRED1, PLD2, C2CD3, SOCS1, PSD3, SKP2, CTNNA1, THY1, GRB10, PLCE1, ARRB1, SPATA13, FGFR2, FGD2, FGFR3, SOX4, AKAP13, TIMP2, ADA, CD74, EPHB2, DOCK2, ECE1, NKX3-1, UBASH3A, SKIL, FGD5, TRP53, MDFI, CNKSR2, VAV3, SMAD7, TRIO, RGNEF, TNFSF11, RGS2, TMOD2, GRK5, SH3RF1, G…	1363	771	14219	1.52896	0.013084	0.000292631	0.00710373
GOTERM_BP_ALL	GO:0060562~epithelial tube morphogenesis	28	1.44778	4.2335e-06	FGFR2, DLC1, ENAH, SHROOM3, PGF, LMO4, DAG1, ZEB2, GLI3, TGFB1, SUFU, PFN1, WNT4, BCL2, CASP8, NUP50, ETV4, TWIST1, BMP4, RET, FZD3, SHANK3, FZD6, DDR1, PHB2, CFL1, GRLF1, PBX1	1363	111	14219	2.63153	0.0142199	0.000311298	0.00772485
GOTERM_BP_ALL	GO:0000902~cell morphogenesis	56	2.89555	4.44645e-06	ENAH, PAX6, L1CAM, CNP, GLI3, TGFB1, WNT4, BDNF, SLC1A3, ROBO1, POU4F2, NRG1, EGFR, C2CD3, EGR2, EFNB3, FOXJ1, KIF5C, STXBP1, CTNNA1, STK4, SLIT3, BBS2, SLITRK4, CFL1, LOC100047930, EFNA5, NGFR, SLITRK5, GAP43, CDK5R1, SHROOM3, SHROOM4, BRSK1, EPHB2, DOCK2, FAT1, BCL2, GBX2, ETV1, ETV4, RUNX3, DCLK1, NOX4, COL18A1, KLK8, KLF7, PTPRZ1, NFASC, LMX1A, RGNEF, SEMA6A, EPHA4, ID1, RBPJ, MYH10	1363	309	14219	1.89061	0.0149298	0.000319999	0.00811341
GOTERM_BP_ALL	GO:0048518~positive regulation of biological process	194	10.031	4.8433e-06	S100A6, PGF, EDN1, L1CAM, CITED2, BDNF, CHRNA7, RAB27A, ICOSL, RARG, RXRG, SKP2, MED14, CTNNA1, MECOM, VASH2, BCL2L11, THY1, ZFP462, JUN, LAMB1-1, CDCA7L, CDK5R1, PTH1R, CD74, ADA, EPHB2, TAL1, BMP4, COL18A1, ODC1, KLF6, KLF7, UTF1, KLF12, CRIP2, MAML1, CREBBP, CIDEB, KDR, ETS1, CSRNP1, TMOD2, RBPJ, GM98, FGF5, BCAR1, GJA1, ZEB2, NFKB1, PTEN, GLI3, GLI1, TGFA, MYC, CYR61, GHR, SH3PXD2B, ATF7IP, R…	1363	1493	14219	1.35555	0.0162514	0.000341294	0.0088375
GOTERM_BP_ALL	GO:0007154~cell communication	74	3.82627	6.93875e-06	SYT1, GM98, LDHA, NUAK2, SYT4, FOXA3, JAG2, GJA1, 1300014I06RIK, ILDR2, VGF, TGFB1, GLI1, SYP, BDNF, WNT4, HMOX1, GRIN2D, GNPAT, CHRNA7, RAPGEF4, SV2A, NRG1, FOSL1, SH3PXD2B, PLD2, EGR2, SLC25A4, NRXN2, UGT8A, STXBP1, CACNG4, RPS6KC1, STX1B, GPR98, ZCCHC14, SMO, ACVR2B, ARHGAP33, GRM6, ABAT, SNX12, NCAN, FGFR2, FRAS1, KCNMB4, CPLX1, ADORA2B, CACNB2, RIMS2, MIP, SYN1, POU2F1, APBA2, POU3F1, SNX24,…	1363	455	14219	1.69665	0.0232005	0.000478944	0.0126608
GOTERM_BP_ALL	GO:0021915~neural tube development	23	1.18925	7.36477e-06	DLC1, BMP4, ENAH, SHROOM3, C2CD3, LMO4, PAX6, ZEB2, EN1, FZD3, GLI3, SUFU, EPHA2, FZD6, PFN1, SMO, CFL1, NUP50, CASP8, GBX2, PHGDH, GRLF1, TWIST1	1363	83	14219	2.89083	0.0246073	0.000498178	0.0134381
GOTERM_BP_ALL	GO:0010629~negative regulation of gene expression	68	3.51603	8.82507e-06	FOXK1, CDX4, RBM15B, NR6A1, HR, ZEB2, NFKB1, CBX1, REST, GLI3, TGFB1, CITED2, KCNIP3, LOC100048295, POU4F2, NRG1, MYC, TWIST2, KHDRBS1, ATF7IP, RARG, CTBP2, RCOR2, FOXJ1, PKIG, ZHX2, SKP2, MLXIPL, TLE4, TLE1, IRF2BP1, PKIA, PURB, MXD4, HIPK2, ZFPM2, LCOR, MTDH, LIN28A, LIN28B, SUFU, SRRT, NPAS1, OVOL1, POU2F1, SKIL, DNMT3B, TDRD1, MDFI, BMP4, CEBPA, TRP53, IKZF4, DNMT3A, EHMT1, KLF12, JARID2, FZD…	1363	410	14219	1.73021	0.0294141	0.000585228	0.0161025
GOTERM_BP_ALL	GO:0048514~blood vessel morphogenesis	40	2.06825	9.90944e-06	FGFR2, FGF18, PGF, EDN1, GJA1, ANPEP, CX3CL1, PRRX2, PTEN, SRF, CITED2, LOC100048295, CUL7, HMOX1, CASP8, GBX2, TGFA, SEMA3C, SOX18, PLCD1, PLXND1, CYR61, COL18A1, BMP4, SMAD7, TBX4, MMP14, JUNB, EPHA2, VASH1, KDR, THY1, ANXA2, SMO, ZMIZ1, ECSCR, ITGA7, HBEGF, ZFPM2, RBPJ	1363	198	14219	2.1075	0.0329681	0.000644481	0.0180809
GOTERM_BP_ALL	GO:0007409~axonogenesis	35	1.80972	1.01936e-05	CDK5R1, ENAH, PAX6, CNP, L1CAM, GLI3, EPHB2, BDNF, ROBO1, BCL2, GBX2, ETV1, POU4F2, ETV4, DCLK1, RUNX3, KLF7, EGR2, EFNB3, PTPRZ1, KIF5C, STXBP1, NFASC, LMX1A, RGNEF, SLIT3, SEMA6A, EPHA4, SLITRK4, LOC100047930, EFNA5, NGFR, SLITRK5, GAP43, MYH10	1363	163	14219	2.24003	0.0338972	0.000650449	0.0185992
GOTERM_BP_ALL	GO:0007423~sensory organ development	48	2.4819	1.0415e-05	FGFR2, FGFR3, EDN1, PAX6, JAG2, ABI2, PRRX2, NHS, GLI3, TGFB1, EPHB2, MIP, SPRY2, BDNF, LOC100048295, CHD7, PVRL1, CHRNA9, BCL2, POU2F1, GBX2, POU4F2, SKIL, COL8A2, MYC, COL11A1, OTOP1, BMP4, GNAT1, RARG, BHLHE22, TMIE, OTX2, FZD3, CACNA1S, GPR98, BCL2L11, FZD6, THY1, GNAT2, DDR1, MIAT, GRLF1, LRP6, GDF11, NEUROD1, TCF15, MYH10	1363	257	14219	1.94841	0.0346207	0.000652271	0.0190032
GOTERM_BP_ALL	GO:0009966~regulation of signal transduction	98	5.06722	1.17381e-05	FGF18, RASGEF1B, FSTL3, TLR3, L1CAM, RGL1, CITED2, WNT4, TIAM1, GPR44, SPRED2, SPRED3, RAPGEF5, RAPGEF4, SPRED1, PLD2, C2CD3, SOCS1, PSD3, SKP2, CTNNA1, THY1, PLCE1, GRB10, ARRB1, SPATA13, FGFR2, FGD2, FGFR3, SOX4, AKAP13, TIMP2, CD74, ADA, DOCK2, ECE1, NKX3-1, UBASH3A, SKIL, FGD5, TRP53, MDFI, CNKSR2, VAV3, SMAD7, TRIO, RGNEF, TNFSF11, RGS2, TMOD2, GRK5, SH3RF1, PREX2, ZEB2, PRRX2, PTEN, SPRY4, …	1363	661	14219	1.54667	0.0389322	0.000721745	0.0214171
GOTERM_BP_ALL	GO:0051252~regulation of RNA metabolic process	191	9.8759	1.23986e-05	CDX4, RBM15B, ZFP334, ARNT2, FOXO1, REST, CBX1, ZIC3, TGFB1, 1700020N01RIK, CITED2, GATA1, ZFP94, LOC100048295, ZFP473, GATA3, CREB3L1, TWIST2, TWIST1, PHOX2A, RARG, PKIG, ZHX2, ZFP628, MLXIPL, RXRG, MTA1, MED14, TCFAP2E, MECOM, PKIA, JUNB, FOXN3, FOXN4, ZFP74, ZFP462, JUN, ZFP790, ZIM1, LOC100047930, SMARCA1, SUPT6H, HMGB2, ZFP560, SOX4, SOX7, ZFP764, MAPKAPK2, LIN28A, ZFP619, LIN28B, SOX8, SRF,…	1363	1488	14219	1.33907	0.0410773	0.000748735	0.0226222
GOTERM_BP_ALL	GO:0032989~cellular component morphogenesis	60	3.10238	1.26886e-05	ENAH, PAX6, L1CAM, CNP, GLI3, TGFB1, ACTG1, WNT4, BDNF, SLC1A3, ROBO1, GNPAT, POU4F2, NRG1, EGFR, C2CD3, EGR2, EFNB3, FOXJ1, KIF5C, STXBP1, MYH6, CTNNA1, STK4, SLIT3, BBS2, SLITRK4, CFL1, LOC100047930, EFNA5, NGFR, SLITRK5, GAP43, CDK5R1, SHROOM3, SHROOM4, BRSK1, ITGB1, EPHB2, DOCK2, FAT1, BCL2, GBX2, ETV1, ETV4, RUNX3, DCLK1, NOX4, COL18A1, KLF7, KLK8, PTPRZ1, NFASC, LMX1A, RGNEF, SEMA6A, EPHA4,…	1363	351	14219	1.78327	0.0420177	0.000752803	0.0231512
GOTERM_BP_ALL	GO:0030036~actin cytoskeleton organization	35	1.80972	1.34045e-05	DLC1, ENAH, LOC100047211, SHROOM3, PDLIM7, SHROOM4, NUAK2, BCAR1, PDLIM3, FHL3, ITGB1, SRF, ESPN, ACTG1, PFN1, ARHGAP6, PRR5, FAT1, BCL2, CNN2, CNN1, ARHGAP8, EHD2, FMNL2, ACTN4, FOXJ1, ARHGEF17, MYH6, FLNA, PPP1R9A, CORO1A, LIMCH1, CFL1, DBN1, AKAP2, MYH10	1363	165	14219	2.21288	0.0443348	0.000781551	0.0244572
GOTERM_BP_ALL	GO:0051239~regulation of multicellular organismal process	111	5.7394	1.67072e-05	FGF18, PGF, EDN1, TLR2, TLR3, REST, PNP, TGFB1, SYP, BDNF, CUL7, TIAM1, GRIN2D, GATA3, CHRNA7, SPN, TWIST2, TWIST1, PHOX2A, ICOSL, PLXNB1, MYH6, CTNNA1, VASH2, VASH1, THY1, BMP2K, ADAMTS1, FGFR2, ADORA2B, BMPR2, BEX1, CX3CL1, TIMP2, ADA, CD74, EPHB2, TAL1, PROCR, TEK, NKX3-1, UBASH3A, MBNL3, TRP53, BMP4, SMAD7, CD276, H2-Q7, NOTCH3, LAMA4, TNFSF11, ETS1, CACNA1G, TBXA2R, PCSK1N, HDAC9, CACNA1B, G…	1363	778	14219	1.48839	0.0549534	0.000957525	0.0304824
GOTERM_BP_ALL	GO:0016481~negative regulation of transcription	62	3.20579	1.99295e-05	FOXK1, CDX4, RBM15B, NR6A1, HR, ZEB2, NFKB1, REST, CBX1, GLI3, TGFB1, CITED2, KCNIP3, LOC100048295, POU4F2, NRG1, MYC, TWIST2, KHDRBS1, ATF7IP, CTBP2, RARG, RCOR2, FOXJ1, PKIG, ZHX2, MLXIPL, TLE4, TLE1, IRF2BP1, PKIA, PURB, MXD4, HIPK2, ZFPM2, LCOR, MTDH, SUFU, NPAS1, OVOL1, POU2F1, SKIL, DNMT3B, MDFI, CEBPA, TRP53, DNMT3A, IKZF4, EHMT1, KLF12, JARID2, FZD1, MYPOP, CDKN1C, SALL4, ID2, ID1, JAZF1,…	1363	372	14219	1.73869	0.0651996	0.00112307	0.0363604
GOTERM_BP_ALL	GO:0000904~cell morphogenesis involved in differentiation	41	2.11996	2.20824e-05	CDK5R1, ENAH, PAX6, L1CAM, CNP, GLI3, TGFB1, EPHB2, WNT4, BDNF, SLC1A3, ROBO1, BCL2, GBX2, ETV1, POU4F2, ETV4, DCLK1, RUNX3, COL18A1, KLF7, EGR2, EFNB3, PTPRZ1, KIF5C, STXBP1, NFASC, LMX1A, RGNEF, SLIT3, SEMA6A, EPHA4, SLITRK4, ID1, LOC100047930, EFNA5, NGFR, RBPJ, SLITRK5, GAP43, MYH10	1363	212	14219	2.01754	0.0719833	0.00122393	0.0402875
GOTERM_BP_ALL	GO:0048812~neuron projection morphogenesis	36	1.86143	2.24854e-05	CDK5R1, ENAH, PAX6, CNP, L1CAM, GLI3, EPHB2, BDNF, ROBO1, BCL2, GBX2, ETV1, POU4F2, ETV4, DCLK1, RUNX3, KLK8, KLF7, EGR2, EFNB3, PTPRZ1, KIF5C, STXBP1, NFASC, LMX1A, RGNEF, SLIT3, SEMA6A, EPHA4, SLITRK4, LOC100047930, EFNA5, NGFR, SLITRK5, GAP43, MYH10	1363	176	14219	2.13385	0.0732477	0.00122617	0.0410226
GOTERM_BP_ALL	GO:0035148~tube lumen formation	18	0.930714	2.43984e-05	DLC1, RET, ENAH, SHROOM3, LMO4, ZEB2, FZD3, SHANK3, BCL2L11, SUFU, FZD6, PFN1, WNT4, CFL1, NUP50, CASP8, GRLF1, TWIST1	1363	59	14219	3.18269	0.0792261	0.00130931	0.044512
GOTERM_BP_ALL	GO:0007264~small GTPase mediated signal transduction	47	2.4302	2.51951e-05	CTNNAL1, RAB3B, RAB3D, GNA12, RASGEF1B, RRAD, RGL1, DIRAS1, RASGRP3, TIAM1, HMOX1, RASL10B, RASGRP2, RAPGEF5, ERAS, RAB25, RAPGEF4, RHOC, ARL5C, RHOF, ARHGDIA, RAB27A, RAP2B, CNKSR1, VAV3, RAB39B, RASEF, PSD3, G3BP2, ARHGEF9, RAB33A, RAB32, PLCE1, RAB31, RAB30, RASL11A, RND1, RAB36, ARF3, REM2, GRLF1, RAB15, RAB13, LRRK1, ARL4C, RAPGEFL1, ARL4A	1363	258	14219	1.90043	0.0817046	0.00133093	0.0459652
GOTERM_BP_ALL	GO:0048598~embryonic morphogenesis	60	3.10238	2.52655e-05	DLC1, ENAH, LMO4, CRABP2, GNA12, EDN1, JAG2, ZEB2, PRRX2, GLI3, GLI1, SPRY2, WNT4, CHRNA9, CASP8, MYC, COL11A1, TWIST1, CYR61, RET, C2CD3, RARG, TMIE, OTX2, MECOM, ACVR2B, CFL1, ZFP697, WNT9A, TGFB1I1, EXT1, FGFR2, SHROOM3, BMPR2, SUFU, MSX2, PFN1, CHD7, NUP50, GBX2, POU2F1, OTOP1, MDFI, BMP4, TRP53, TBX4, HSPG2, EN1, FZD3, EPHA2, SHANK3, FZD6, WNT7B, SALL4, GCM1, GRLF1, LRP6, NEUROD1, PBX1, WNT7A	1363	359	14219	1.74353	0.0819231	0.00131412	0.0460935
GOTERM_BP_ALL	GO:0001838~embryonic epithelial tube formation	17	0.879007	2.87144e-05	DLC1, RET, ENAH, SHROOM3, LMO4, ZEB2, FZD3, SUFU, SHANK3, FZD6, PFN1, WNT4, CFL1, NUP50, CASP8, GRLF1, TWIST1	1363	54	14219	3.28419	0.092573	0.00147077	0.052384
GOTERM_BP_ALL	GO:0016331~morphogenesis of embryonic epithelium	21	1.08583	3.20656e-05	FGFR2, DLC1, RET, ENAH, C2CD3, SHROOM3, LMO4, JAG2, ZEB2, FZD3, SHANK3, SUFU, FZD6, PFN1, WNT4, CFL1, NUP50, CASP8, GRLF1, TGFB1I1, TWIST1	1363	78	14219	2.80865	0.102803	0.00161779	0.0584959
GOTERM_BP_ALL	GO:0019222~regulation of metabolic process	341	17.6319	3.36795e-05	ADCY1, ADCY2, ADCY7, CDX4, ZFP334, ADCY6, EDN1, BBX, REST, 1700020N01RIK, CITED2, BDNF, ZFP94, ZFP473, TIGD3, CREB3L1, RAPGEF4, TIGD5, TWIST2, TWIST1, PHOX2A, ICOSL, RARG, RCOR2, ZFP628, SKP2, RXRG, ZFP467, ZHX2, MED14, MECOM, THY1, ZFP74, BAZ1A, ZFP462, PARP14, JUN, MAPK3, ZIM1, LOC100047930, CDCA7L, VGLL3, SUPT6H, PTH1R, IGF2BP1, ZFP619, CD74, ZFP618, PFN1, TAL1, TCF20, ARG2, PBRM1, LHX6, ARNTL…	1363	2942	14219	1.20916	0.107688	0.00167418	0.0614393
GOTERM_BP_ALL	GO:0031323~regulation of cellular metabolic process	325	16.8046	3.39326e-05	ADCY1, ADCY2, ADCY7, CDX4, ZFP334, ADCY6, EDN1, BBX, REST, 1700020N01RIK, CITED2, ZFP94, ZFP473, TIGD3, CREB3L1, RAPGEF4, TIGD5, TWIST2, TWIST1, PHOX2A, ICOSL, RARG, RCOR2, ZFP628, RXRG, ZFP467, ZHX2, MED14, MECOM, THY1, ZFP74, BAZ1A, ZFP462, JUN, PARP14, MAPK3, ZIM1, LOC100047930, CDCA7L, VGLL3, SUPT6H, PTH1R, IGF2BP1, ZFP619, CD74, ZFP618, PFN1, TAL1, TCF20, ARG2, PBRM1, LHX6, ARNTL2, DNMT3B, B…	1363	2786	14219	1.21696	0.108452	0.00166233	0.0619009
GOTERM_BP_ALL	GO:0048858~cell projection morphogenesis	39	2.01655	3.75623e-05	CDK5R1, ENAH, PAX6, L1CAM, CNP, GLI3, EPHB2, BDNF, ROBO1, BCL2, GBX2, ETV1, POU4F2, ETV4, DCLK1, RUNX3, KLF7, KLK8, C2CD3, EGR2, EFNB3, PTPRZ1, FOXJ1, KIF5C, STXBP1, NFASC, LMX1A, RGNEF, SLIT3, SEMA6A, EPHA4, BBS2, SLITRK4, LOC100047930, EFNA5, NGFR, SLITRK5, GAP43, MYH10	1363	202	14219	2.01413	0.119333	0.00181372	0.0685202
GOTERM_BP_ALL	GO:0045934~negative regulation of nucleobase, nucleoside, nucleotide and nucleic acid metabolic process	64	3.3092	4.01912e-05	FOXK1, CDX4, RBM15B, NR6A1, EDN1, HR, ZEB2, NFKB1, REST, CBX1, GLI3, TGFB1, CITED2, KCNIP3, LOC100048295, STRA8, POU4F2, NRG1, MYC, TWIST2, KHDRBS1, ATF7IP, CTBP2, RARG, RCOR2, FOXJ1, PKIG, ZHX2, MLXIPL, TLE4, TLE1, IRF2BP1, PKIA, PURB, MXD4, HIPK2, ZFPM2, LCOR, MTDH, SUFU, NPAS1, OVOL1, POU2F1, SKIL, DNMT3B, MDFI, CEBPA, TRP53, DNMT3A, IKZF4, EHMT1, KLF12, JARID2, FZD1, MYPOP, CDKN1C, SALL4, ID2…	1363	397	14219	1.68175	0.127131	0.00191323	0.0733141
GOTERM_BP_ALL	GO:0006355~regulation of transcription, DNA-dependent	185	9.56567	4.55352e-05	CDX4, ARNT2, ZFP334, FOXO1, REST, CBX1, ZIC3, TGFB1, 1700020N01RIK, CITED2, GATA1, ZFP94, LOC100048295, ZFP473, GATA3, CREB3L1, TWIST2, TWIST1, PHOX2A, RARG, PKIG, ZHX2, ZFP628, MLXIPL, RXRG, MTA1, MED14, TCFAP2E, MECOM, PKIA, JUNB, FOXN3, FOXN4, ZFP74, ZFP462, JUN, ZFP790, ZIM1, LOC100047930, SMARCA1, SUPT6H, HMGB2, ZFP560, SOX4, SOX7, ZFP764, LIN28A, ZFP619, LIN28B, SOX8, SRF, PFN1, ZFP568, TAL…	1363	1465	14219	1.31737	0.14277	0.00213728	0.0830583
GOTERM_BP_ALL	GO:0048667~cell morphogenesis involved in neuron differentiation	36	1.86143	4.68466e-05	CDK5R1, ENAH, PAX6, CNP, L1CAM, GLI3, EPHB2, BDNF, SLC1A3, ROBO1, BCL2, GBX2, ETV1, POU4F2, ETV4, DCLK1, RUNX3, KLF7, EGR2, EFNB3, PTPRZ1, KIF5C, STXBP1, NFASC, LMX1A, RGNEF, SLIT3, SEMA6A, EPHA4, SLITRK4, LOC100047930, EFNA5, NGFR, SLITRK5, GAP43, MYH10	1363	182	14219	2.0635	0.146565	0.00216868	0.0854494
GOTERM_BP_ALL	GO:0051172~negative regulation of nitrogen compound metabolic process	64	3.3092	5.52995e-05	FOXK1, CDX4, RBM15B, NR6A1, EDN1, HR, ZEB2, NFKB1, REST, CBX1, GLI3, TGFB1, CITED2, KCNIP3, LOC100048295, STRA8, POU4F2, NRG1, MYC, TWIST2, KHDRBS1, ATF7IP, CTBP2, RARG, RCOR2, FOXJ1, PKIG, ZHX2, MLXIPL, TLE4, TLE1, IRF2BP1, PKIA, PURB, MXD4, HIPK2, ZFPM2, LCOR, MTDH, SUFU, NPAS1, OVOL1, POU2F1, SKIL, DNMT3B, MDFI, CEBPA, TRP53, DNMT3A, IKZF4, EHMT1, KLF12, JARID2, FZD1, MYPOP, CDKN1C, SALL4, ID2…	1363	401	14219	1.66498	0.170625	0.00252496	0.10086
GOTERM_BP_ALL	GO:0034329~cell junction assembly	10	0.517063	6.68671e-05	DLC1, JUB, ARHGAP6, ITGA5, BCL2, GNPAT, LAMC1, ITGB3, CTNNA1, THY1	1363	21	14219	4.96768	0.202457	0.00301171	0.121946
GOTERM_BP_ALL	GO:0045892~negative regulation of transcription, DNA-dependent	52	2.68873	7.1855e-05	FOXK1, CDX4, NR6A1, NFKB1, REST, CBX1, TGFB1, KCNIP3, CITED2, LOC100048295, POU4F2, MYC, TWIST2, ATF7IP, CTBP2, RARG, FOXJ1, PKIG, ZHX2, MLXIPL, TLE4, TLE1, IRF2BP1, PKIA, PURB, HIPK2, ZFPM2, LCOR, MTDH, SUFU, NPAS1, OVOL1, SKIL, DNMT3B, CEBPA, MDFI, TRP53, DNMT3A, IKZF4, EHMT1, KLF12, JARID2, MYPOP, CDKN1C, SALL4, ID2, ID1, JAZF1, BCL6B, ID3, RBPJ, HDAC9	1363	308	14219	1.76127	0.215802	0.0031935	0.131037
GOTERM_BP_ALL	GO:0022603~regulation of anatomical structure morphogenesis	36	1.86143	8.33442e-05	FGFR2, SHROOM3, ADORA2B, PGF, GNA12, CX3CL1, TGFB1, EPHB2, BDNF, METRN, TIAM1, BCL2, TEK, ETV4, BMP4, COL4A2, KLK8, PLXNB1, VASH2, VASH1, THY1, CORO1A, YWHAH, STAB1, ID1, PHB2, ITGA7, GRLF1, SPNA1, ADAMTS1, MYH14, NGFR, ARAP3, WNT7A, AKAP2, MYH10	1363	187	14219	2.00833	0.2457	0.00365519	0.151974
GOTERM_BP_ALL	GO:0051253~negative regulation of RNA metabolic process	52	2.68873	8.53172e-05	FOXK1, CDX4, NR6A1, NFKB1, REST, CBX1, TGFB1, KCNIP3, CITED2, LOC100048295, POU4F2, MYC, TWIST2, ATF7IP, CTBP2, RARG, FOXJ1, PKIG, ZHX2, MLXIPL, TLE4, TLE1, IRF2BP1, PKIA, PURB, HIPK2, ZFPM2, LCOR, MTDH, SUFU, NPAS1, OVOL1, SKIL, DNMT3B, CEBPA, MDFI, TRP53, DNMT3A, IKZF4, EHMT1, KLF12, JARID2, MYPOP, CDKN1C, SALL4, ID2, ID1, JAZF1, BCL6B, ID3, RBPJ, HDAC9	1363	310	14219	1.74991	0.250718	0.00369368	0.155569
GOTERM_BP_ALL	GO:0009890~negative regulation of biosynthetic process	67	3.46432	0.00010129	FOXK1, CDX4, RBM15B, NR6A1, EDN1, HR, ZEB2, NFKB1, REST, CBX1, GLI3, TGFB1, CITED2, KCNIP3, EIF4EBP2, LOC100048295, STRA8, POU4F2, NRG1, MYC, TWIST2, KHDRBS1, ATF7IP, CTBP2, RARG, RCOR2, FOXJ1, PKIG, ZHX2, MLXIPL, TLE4, TLE1, IRF2BP1, PKIA, PURB, MXD4, HIPK2, ZFPM2, LCOR, MTDH, SUFU, NPAS1, OVOL1, POU2F1, SKIL, DNMT3B, GCHFR, MDFI, CEBPA, TRP53, DNMT3A, IKZF4, EHMT1, KLF12, JARID2, FZD1, CD276, M…	1363	434	14219	1.61049	0.290135	0.00432833	0.184668
GOTERM_BP_ALL	GO:0010558~negative regulation of macromolecule biosynthetic process	65	3.36091	0.000105227	FOXK1, CDX4, RBM15B, NR6A1, HR, ZEB2, NFKB1, REST, CBX1, GLI3, TGFB1, CITED2, KCNIP3, EIF4EBP2, LOC100048295, STRA8, POU4F2, NRG1, MYC, TWIST2, KHDRBS1, ATF7IP, CTBP2, RARG, RCOR2, FOXJ1, PKIG, ZHX2, MLXIPL, TLE4, TLE1, IRF2BP1, PKIA, PURB, MXD4, HIPK2, ZFPM2, LCOR, MTDH, SUFU, NPAS1, OVOL1, POU2F1, SKIL, DNMT3B, MDFI, CEBPA, TRP53, DNMT3A, IKZF4, EHMT1, KLF12, JARID2, FZD1, CD276, MYPOP, CDKN1C,…	1363	418	14219	1.62222	0.299528	0.00444012	0.19184
GOTERM_BP_ALL	GO:0032990~cell part morphogenesis	39	2.01655	0.000110228	CDK5R1, ENAH, PAX6, L1CAM, CNP, GLI3, EPHB2, BDNF, ROBO1, BCL2, GBX2, ETV1, POU4F2, ETV4, DCLK1, RUNX3, KLF7, KLK8, C2CD3, EGR2, EFNB3, PTPRZ1, FOXJ1, KIF5C, STXBP1, NFASC, LMX1A, RGNEF, SLIT3, SEMA6A, EPHA4, BBS2, SLITRK4, LOC100047930, EFNA5, NGFR, SLITRK5, GAP43, MYH10	1363	212	14219	1.91912	0.311282	0.00459341	0.20095
GOTERM_BP_ALL	GO:0030334~regulation of cell migration	22	1.13754	0.00012876	COL18A1, JUB, LOC100047211, IRS2, BCAR1, TLR2, PAX6, ITGB3, NEXN, PTEN, ADA, VCL, THY1, PRR5, CORO1A, LAMA4, BCL2, TEK, LAMB1-1, HBEGF, ARHGAP8, ARAP3, TRIP6	1363	92	14219	2.49464	0.353139	0.0052984	0.234696
GOTERM_BP_ALL	GO:0031327~negative regulation of cellular biosynthetic process	66	3.41262	0.000135969	FOXK1, CDX4, RBM15B, NR6A1, EDN1, HR, ZEB2, NFKB1, REST, CBX1, GLI3, TGFB1, CITED2, KCNIP3, EIF4EBP2, LOC100048295, STRA8, POU4F2, NRG1, MYC, TWIST2, KHDRBS1, ATF7IP, CTBP2, RARG, RCOR2, FOXJ1, PKIG, ZHX2, MLXIPL, TLE4, TLE1, IRF2BP1, PKIA, PURB, MXD4, HIPK2, ZFPM2, LCOR, MTDH, SUFU, NPAS1, OVOL1, POU2F1, SKIL, DNMT3B, MDFI, CEBPA, TRP53, DNMT3A, IKZF4, EHMT1, KLF12, JARID2, FZD1, CD276, MYPOP, C…	1363	430	14219	1.60121	0.368724	0.00552699	0.24782
GOTERM_BP_ALL	GO:0007044~cell-substrate junction assembly	8	0.41365	0.000136457	DLC1, JUB, ARHGAP6, ITGA5, BCL2, LAMC1, ITGB3, THY1	1363	14	14219	5.96122	0.369767	0.00548095	0.248709
GOTERM_BP_ALL	GO:0016043~cellular component organization	227	11.7373	0.000142597	DLC1, GM6682, JUB, PDLIM7, TUBB2A, PDLIM3, L1CAM, AU015228, SYP, ACTG1, BDNF, CHRNA7, INA, PLD2, ARC, EFNB3, KIF5C, MYH6, CTNNA1, THY1, TIMM8A1, BAZ1A, TAGLN, LAMB1-1, LOC100047930, PELO, EFNA5, LAMC1, NEK4, BIN1, DBN1, LOC100047211, CDK5R1, HSPA1A, HSPA1B, CD74, EPHB2, PFN1, PBRM1, DNMT3B, OLFM1, NUDC, COL18A1, DNMT3A, KLF7, LGALS3, CREBBP, CDC27, EPHA4, SEMA6A, RBPJ, CLCN5, NUAK2, BCAR1, GLI3, …	1363	1891	14219	1.2523	0.382725	0.00565969	0.259886
GOTERM_BP_ALL	GO:0007169~transmembrane receptor protein tyrosine kinase signaling pathway	36	1.86143	0.000143855	FGFR2, FGF18, FGF5, FGFR3, FGF15, ERBB3, BCAR1, FGF17, BEX1, BMPR2, FOXO1, CLNK, PTEN, EPHB2, EIF4EBP2, TIAM1, TEK, TGFA, GHR, EGFR, IRS2, RET, EFNB3, FLT4, STXBP4, EPHA1, FLNA, EPHA2, KDR, DDR1, EPHA4, GRB10, CSRNP1, ROR1, HBEGF, PTPN1	1363	192	14219	1.95603	0.385345	0.00564326	0.262175
GOTERM_BP_ALL	GO:0051171~regulation of nitrogen compound metabolic process	277	14.3226	0.000154057	ADCY1, ADCY2, ADCY7, CDX4, ADCY6, ZFP334, EDN1, BBX, REST, 1700020N01RIK, CITED2, ZFP94, ZFP473, TIGD3, CREB3L1, TIGD5, TWIST2, TWIST1, PHOX2A, RARG, RCOR2, ZFP628, RXRG, ZFP467, ZHX2, MED14, MECOM, ZFP74, BAZ1A, ZFP462, JUN, PARP14, MAPK3, ZIM1, LOC100047930, CDCA7L, VGLL3, SUPT6H, PTH1R, ZFP619, ZFP618, PFN1, TAL1, TCF20, ARG2, PBRM1, LHX6, ARNTL2, DNMT3B, NKRF, MDFI, BMP4, IKZF4, DNMT3A, KLF6,…	1363	2372	14219	1.21826	0.406202	0.00597308	0.280745
GOTERM_BP_ALL	GO:0000122~negative regulation of transcription from RNA polymerase II promoter	41	2.11996	0.000159459	MTDH, CDX4, NR6A1, SUFU, TGFB1, KCNIP3, NPAS1, LOC100048295, OVOL1, POU4F2, SKIL, MYC, CEBPA, MDFI, ATF7IP, TRP53, DNMT3A, EHMT1, RARG, KLF12, JARID2, FOXJ1, PKIG, ZHX2, MLXIPL, TLE4, TLE1, IRF2BP1, MYPOP, PKIA, CDKN1C, SALL4, ID2, ID1, HIPK2, BCL6B, JAZF1, ZFPM2, ID3, HDAC9, LCOR	1363	231	14219	1.85159	0.416956	0.00611184	0.290575
GOTERM_BP_ALL	GO:0051270~regulation of cell motion	24	1.24095	0.000165547	COL18A1, JUB, LOC100047211, IRS2, ACTN4, BCAR1, TLR2, PAX6, ITGB3, NEXN, PTEN, ADA, VCL, THY1, BBS2, PRR5, CORO1A, LAMA4, BCL2, LAMB1-1, TEK, HBEGF, ARHGAP8, ARAP3, TRIP6	1363	107	14219	2.33992	0.428844	0.00627342	0.301654
GOTERM_BP_ALL	GO:0008285~negative regulation of cell proliferation	40	2.06825	0.000170326	DLC1, CAV2, FGFR3, PTGS2, E2F7, PTH1R, PAX6, SFN, TIMP2, GLI3, PTEN, TGFB1, H19, MSX2, SPRY2, BDNF, GATA3, BCL2, HMOX1, NKX3-1, LTB, ETV4, RUNX3, SPN, CEBPA, NOX4, BMP4, TRP53, RARG, JARID2, FOXJ1, CD276, CTNNA1, VASH1, DDR1, JUN, PHB2, GDF11, LOC100047930, RBPJ	1363	224	14219	1.86288	0.438004	0.00638244	0.310348
GOTERM_BP_ALL	GO:0031328~positive regulation of cellular biosynthetic process	80	4.1365	0.000171302	HSP90AB1, GM98, E2F3, FOXK1, ARNT2, TLR2, PAX6, FOXO1, TLR3, EIF5A, NFKB1, GLI3, TGFB1, ZIC3, RAET1B, CITED2, GLI1, RAET1A, LOC100048295, GATA3, PAX8, POU4F2, MKL1, FOSL1, MYC, LTB, SPN, ATF7IP, ICOSL, EGR2, RARG, SOX11, OTX2, MLXIPL, RXRG, MED14, TCFAP2E, MECOM, SMO, ZFP462, JUN, ZMIZ1, HIPK2, ZFPM2, SMARCA1, HMGB2, ADORA2B, UBE3A, SOX4, LIN28A, SRF, ARID2, SOX8, GM3258, NFAT5, POU2F1, ETV1, TCE…	1363	552	14219	1.5119	0.439857	0.00634858	0.312124
GOTERM_BP_ALL	GO:0007015~actin filament organization	16	0.827301	0.000180023	ENAH, SHROOM4, ACTN4, BCAR1, PDLIM3, SRF, FLNA, ESPN, PPP1R9A, CORO1A, ARHGAP6, FAT1, BCL2, CFL1, AKAP2, DBN1	1363	56	14219	2.98061	0.456146	0.0065985	0.327991
GOTERM_BP_ALL	GO:0009889~regulation of biosynthetic process	287	14.8397	0.000184936	ADCY1, ADCY2, ADCY7, CDX4, ADCY6, ZFP334, EDN1, BBX, REST, 1700020N01RIK, CITED2, ZFP94, ZFP473, TIGD3, CREB3L1, TIGD5, TWIST2, TWIST1, PHOX2A, ICOSL, RARG, RCOR2, ZFP628, RXRG, ZFP467, ZHX2, MED14, MECOM, ZFP74, BAZ1A, ZFP462, JUN, PARP14, MAPK3, ZIM1, LOC100047930, CDCA7L, VGLL3, SUPT6H, PTH1R, IGF2BP1, ZFP619, ZFP618, PFN1, TAL1, TCF20, ARG2, PBRM1, LHX6, ARNTL2, DNMT3B, NKRF, MDFI, BMP4, IKZF…	1363	2476	14219	1.20922	0.46511	0.00670532	0.336926
GOTERM_BP_ALL	GO:0031326~regulation of cellular biosynthetic process	286	14.788	0.000194827	ADCY1, ADCY2, ADCY7, CDX4, ADCY6, ZFP334, EDN1, BBX, REST, 1700020N01RIK, CITED2, ZFP94, ZFP473, TIGD3, CREB3L1, TIGD5, TWIST2, TWIST1, PHOX2A, ICOSL, RARG, RCOR2, ZFP628, RXRG, ZFP467, ZHX2, MED14, MECOM, ZFP74, BAZ1A, ZFP462, JUN, PARP14, MAPK3, ZIM1, LOC100047930, CDCA7L, VGLL3, SUPT6H, PTH1R, IGF2BP1, ZFP619, ZFP618, PFN1, TAL1, TCF20, ARG2, PBRM1, LHX6, ARNTL2, DNMT3B, NKRF, MDFI, BMP4, IKZF…	1363	2467	14219	1.2094	0.482716	0.00698784	0.354916
GOTERM_BP_ALL	GO:0051093~negative regulation of developmental process	40	2.06825	0.000206086	CALCR, BEX1, PAX6, REST, GLI3, ITGB1, CD74, TGFB1, EPHB2, WNT4, BDNF, BCL2, RHOC, MBNL3, SKIL, TWIST2, TWIST1, ZFP36, BMP4, TRP53, COL4A2, KLK8, FOXJ1, CREBBP, LMX1A, CTNNA1, VASH1, THY1, NOTCH3, YWHAH, STAB1, GDF11, PBX1, ADAMTS1, WNT9A, NGFR, TGFB1I1, RBPJ, HDAC9, TOB2	1363	226	14219	1.8464	0.502053	0.00731273	0.375391
GOTERM_BP_ALL	GO:0019219~regulation of nucleobase, nucleoside, nucleotide and nucleic acid metabolic process	274	14.1675	0.000213444	ADCY1, ADCY2, ADCY7, CDX4, ADCY6, ZFP334, EDN1, BBX, REST, 1700020N01RIK, CITED2, ZFP94, ZFP473, TIGD3, CREB3L1, TIGD5, TWIST2, TWIST1, PHOX2A, RARG, RCOR2, ZFP628, RXRG, ZFP467, ZHX2, MED14, MECOM, ZFP74, BAZ1A, ZFP462, JUN, PARP14, MAPK3, ZIM1, LOC100047930, CDCA7L, VGLL3, SUPT6H, PTH1R, ZFP619, ZFP618, PFN1, TAL1, TCF20, PBRM1, LHX6, ARNTL2, DNMT3B, NKRF, MDFI, BMP4, IKZF4, DNMT3A, KLF6, UTF1,…	1363	2353	14219	1.21479	0.514296	0.00749424	0.388768
GOTERM_BP_ALL	GO:0051179~localization	305	15.7704	0.000227372	S100A4, JUB, SYT1, SLC9A7, SYT4, SYT5, SYT3, EDN1, AQP5, SYP, ATCAY, BDNF, CHRNA9, KCNK6, LCAT, GRIN2D, RAB25, RAPGEF4, CHRNA7, NUP35, TWIST1, RAB27A, PLD2, ARC, SRP54A, 2010107G12RIK, MYH6, PITPNM1, RPS19, TIMM8A1, CD34, ABCB1B, RAB15, RAB13, LAMC1, BIN1, KCNMB4, 1700034H14RIK, LOC100047211, RBP7, CDK5R1, RBP1, TMX4, CACNB2, RIMS2, KCNJ3, RIMS4, CD74, RIMS3, PFN1, IL17B, SPNB2, NUP50, LHX6, STX1…	1363	2659	14219	1.19662	0.536657	0.00789943	0.414088
GOTERM_BP_ALL	GO:0009891~positive regulation of biosynthetic process	80	4.1365	0.000231344	HSP90AB1, GM98, E2F3, FOXK1, ARNT2, TLR2, PAX6, FOXO1, TLR3, EIF5A, NFKB1, GLI3, TGFB1, ZIC3, RAET1B, CITED2, GLI1, RAET1A, LOC100048295, GATA3, PAX8, POU4F2, MKL1, FOSL1, MYC, LTB, SPN, ATF7IP, ICOSL, EGR2, RARG, SOX11, OTX2, MLXIPL, RXRG, MED14, TCFAP2E, MECOM, SMO, ZFP462, JUN, ZMIZ1, HIPK2, ZFPM2, SMARCA1, HMGB2, ADORA2B, UBE3A, SOX4, LIN28A, SRF, ARID2, SOX8, GM3258, NFAT5, POU2F1, ETV1, TCE…	1363	557	14219	1.49833	0.542842	0.0079552	0.421307
GOTERM_BP_ALL	GO:0010605~negative regulation of macromolecule metabolic process	74	3.82627	0.000237924	FOXK1, CDX4, RBM15B, NR6A1, HR, ZEB2, NFKB1, CBX1, REST, GLI3, TGFB1, CITED2, KCNIP3, EIF4EBP2, LOC100048295, STRA8, POU4F2, NRG1, MYC, TWIST2, KHDRBS1, ATF7IP, RARG, CTBP2, RCOR2, FOXJ1, PKIG, SOCS1, ZHX2, MLXIPL, SKP2, TLE4, TLE1, IRF2BP1, PKIA, PURB, FLNA, MXD4, JUN, HIPK2, ZFPM2, LCOR, MTDH, LIN28A, LIN28B, SUFU, SRRT, NPAS1, OVOL1, POU2F1, SKIL, DNMT3B, TDRD1, MDFI, BMP4, CEBPA, TRP53, IKZF4…	1363	506	14219	1.52565	0.552909	0.00809827	0.433266
GOTERM_BP_ALL	GO:0008284~positive regulation of cell proliferation	47	2.4302	0.000267459	FGFR2, FGF5, FGF18, E2F3, FGFR3, FOSL2, FGF15, FGF17, PTH1R, EDN1, PAX6, ST8SIA1, BEX1, CNTFR, PRRX2, PNP, ITGB1, ADA, TGFB1, GLI1, BCL2, TGFA, MYC, SPN, COL18A1, EGFR, ODC1, IRS2, ICOSL, CRIP2, FLT4, RASIP1, VASH2, KDR, MYCN, SMO, TNS3, CORO1A, CCND2, ZMIZ1, HIPK2, HBEGF, PBX1, CDCA7L, NGFR, RBPJ, F2R	1363	284	14219	1.72644	0.595432	0.00900853	0.486926
GOTERM_BP_ALL	GO:0044092~negative regulation of molecular function	27	1.39607	0.000285849	MDFI, CFLAR, FOXJ1, PKIG, STIM2, HSPA1A, HSPA1B, PKIA, FLNA, SPRY4, LATS2, THY1, SH3BP5, SMO, SPRY2, CHRM4, ZFP462, ARG2, GPR44, HMOX1, GRM6, SPRED2, SPRED3, SPRED1, DUSP9, GADD45A, MYC, DHCR24	1363	132	14219	2.13385	0.619841	0.00953019	0.520323
GOTERM_BP_ALL	GO:0001501~skeletal system development	47	2.4302	0.000290078	FGFR2, FGF18, RAI1, FGFR3, PDLIM7, PTGS2, EDN1, PTH1R, JAG2, DLK1, PRRX2, GLI3, MMP2, TGFB1, BCL2, ANKRD11, PTN, MYC, PAPSS2, COL11A1, RPS27A, BMP4, MDFI, RARG, BMP1, LGALS3, TBX4, DLL3, HSPG2, MMP14, CACNA1S, COL5A2, EPHA2, SMO, ACVR2B, TNFSF11, CSRNP1, MAPK3, ZFP697, SORT1, PBX1, WNT9A, WNT7A, BMP8B, TCF15, BMP6, BMP8A	1363	285	14219	1.72039	0.625243	0.00957617	0.528002
GOTERM_BP_ALL	GO:0007010~cytoskeleton organization	52	2.68873	0.000305016	DLC1, PRPH, ENAH, PDLIM7, NUAK2, BCAR1, PDLIM3, CNP, ACTG1, ARHGAP6, ARHGAP8, TUBA1B, INA, FMNL2, ACTN4, MTAP2, FOXJ1, ARHGEF17, GAN, MYH6, FLNA, THY1, BBS2, TAGLN, LIMCH1, CFL1, MTAP1B, AKAP2, GADD45A, DBN1, HAUS4, LOC100047211, SHROOM3, SHROOM4, FHL3, ITGB1, SRF, ESPN, PFN1, PRR5, DOCK2, FAT1, BCL2, NEFH, CNN2, CNN1, EHD2, RGNEF, CORO1A, PPP1R9A, YWHAH, ARHGAP10, MYH10	1363	326	14219	1.66402	0.643716	0.00996964	0.55512
GOTERM_BP_ALL	GO:0043588~skin development	11	0.568769	0.000314919	FRAS1, TGM3, NGFR, SFN, WNT7A, LTB, COL5A2, COL5A1, TCF15, SUFU, DHCR24	1363	30	14219	3.82512	0.655458	0.0101932	0.573094
GOTERM_BP_ALL	GO:0001525~angiogenesis	27	1.39607	0.000323585	FGFR2, FGF18, PGF, EDN1, ANPEP, CX3CL1, PTEN, SRF, HMOX1, CASP8, GBX2, TGFA, SOX18, PLCD1, PLXND1, CYR61, COL18A1, BMP4, TBX4, MMP14, VASH1, ANXA2, THY1, KDR, ECSCR, HBEGF, RBPJ	1363	133	14219	2.1178	0.665415	0.0103731	0.588821
GOTERM_BP_ALL	GO:0065007~biological regulation	722	37.332	0.000347438	DLC1, JUB, SLC9A7, PTGS2, PGF, FSTL3, L1CAM, REST, CITED2, SYP, LPHN2, LPHN3, DIRAS1, CUL7, PPP1R1A, GRIN2D, TIGD3, TIGD5, GNG3, RAB27A, PHOX2A, ICOSL, MAGI2, RCOR2, SKP2, ZHX2, F8, RXRG, MED14, MYH6, MECOM, CTNNA1, BCL2L11, THY1, GRB10, RPS19, F5, JUN, MAPK3, ABAT, HSD11B2, ADAMTS1, VGLL3, IGFBPL1, GNAI1, ERBB3, PTH1R, HSPA1A, HSPA1B, PFN1, 2610018G03RIK, PROCR, ARG2, UBASH3A, ARNTL2, DNMT3B, DN…	1363	6903	14219	1.09112	0.691362	0.0110292	0.632096
GOTERM_BP_ALL	GO:0010557~positive regulation of macromolecule biosynthetic process	76	3.92968	0.000356464	GM98, E2F3, FOXK1, ARNT2, PAX6, FOXO1, EIF5A, TLR3, NFKB1, GLI3, TGFB1, ZIC3, CITED2, GLI1, LOC100048295, GATA3, PAX8, POU4F2, MKL1, FOSL1, MYC, LTB, SPN, ATF7IP, ICOSL, RARG, EGR2, SOX11, OTX2, MLXIPL, RXRG, MED14, TCFAP2E, MECOM, SMO, ZFP462, JUN, ZMIZ1, HIPK2, ZFPM2, SMARCA1, HMGB2, UBE3A, SOX4, LIN28A, SRF, SOX8, ARID2, GM3258, NFAT5, POU2F1, ETV1, TCEA1, SUPT4H1, POU3F1, NFATC2, ETV4, HMGA1-…	1363	530	14219	1.49593	0.700648	0.011209	0.648468
GOTERM_BP_ALL	GO:0045595~regulation of cell differentiation	59	3.05067	0.000366433	FGF18, PAX6, REST, PNP, GLI3, TGFB1, METRN, WNT4, BDNF, PLEKHB1, CUL7, TIAM1, POU4F2, RHOC, NRG1, TWIST2, TWIST1, ZFP36, SH3PXD2B, PLXNB1, FOXJ1, CTNNA1, JUNB, THY1, SMO, TCFL5, LCK, WNT9A, TGFB1I1, FGFR3, BEX1, TIMP2, SRF, ITGB1, CD74, ADA, EPHB2, TAL1, BCL2, SKIL, MBNL3, BMP4, TRP53, KLK8, CREBBP, CD276, LMX1A, NOTCH3, WNT7B, YWHAH, TNFSF11, ID2, ETS1, GDF11, PBX1, HDAC9, RBPJ, WNT7A, TOB2	1363	386	14219	1.59455	0.710578	0.0114146	0.666545
GOTERM_BP_ALL	GO:0050789~regulation of biological process	687	35.5222	0.000383556	DLC1, JUB, PTGS2, PGF, FSTL3, L1CAM, REST, CITED2, SYP, LPHN2, LPHN3, DIRAS1, CUL7, PPP1R1A, GRIN2D, TIGD3, TIGD5, GNG3, RAB27A, PHOX2A, ICOSL, MAGI2, RCOR2, SKP2, ZHX2, RXRG, MED14, MYH6, MECOM, CTNNA1, BCL2L11, THY1, GRB10, JUN, MAPK3, ADAMTS1, VGLL3, IGFBPL1, ERBB3, GNAI1, PTH1R, HSPA1A, HSPA1B, PFN1, 2610018G03RIK, PROCR, ARG2, UBASH3A, ARNTL2, DNMT3B, DNMT3A, ODC1, UTF1, KLF12, RASEF, SFMBT2…	1363	6542	14219	1.09552	0.726873	0.011836	0.697589
GOTERM_BP_ALL	GO:0010468~regulation of gene expression	279	14.4261	0.000424499	CDX4, ZFP334, BBX, REST, 1700020N01RIK, CITED2, ZFP94, ZFP473, TIGD3, CREB3L1, TIGD5, TWIST2, TWIST1, PHOX2A, RARG, RCOR2, ZFP628, SKP2, RXRG, ZFP467, ZHX2, MED14, MECOM, ZFP74, BAZ1A, ZFP462, JUN, PARP14, MAPK3, ZIM1, LOC100047930, CDCA7L, VGLL3, SUPT6H, IGF2BP1, ZFP619, ZFP618, PFN1, TAL1, TCF20, PBRM1, LHX6, ARNTL2, DNMT3B, TDRD1, NKRF, MDFI, BMP4, IKZF4, DNMT3A, KLF6, UTF1, KLF7, KLF12, SMAD7…	1363	2429	14219	1.19826	0.762214	0.0129732	0.771782
GOTERM_BP_ALL	GO:0032879~regulation of localization	61	3.15408	0.000440765	JUB, SYT4, BCAR1, EDN1, TLR2, PAX6, GLI3, PTEN, TGFB1, VCL, PACSIN1, HMOX1, CHRNA7, RAPGEF4, ARHGAP8, LTB, KHDRBS1, IRS2, ATP4A, ACTN4, PFKL, PKIG, STIM2, NEXN, PKIA, FLNA, THY1, SMO, BBS2, GRB10, LCK, LAMB1-1, BIN1, STON2, ARHGDIG, RAB3B, LOC100047211, STON1, ADORA2B, RAB3D, ITGB3, SYCP1, SUFU, ADA, PRR5, GP1BB, BCL2, TEK, CAMK2A, ARHGDIA, COL18A1, PARK2, PEA15A, DDX4, KCNN4, LAMA4, CORO1A, PLCG…	1363	406	14219	1.56739	0.774951	0.0133465	0.801243
GOTERM_BP_ALL	GO:0009892~negative regulation of metabolic process	76	3.92968	0.000442374	FOXK1, CDX4, RBM15B, NR6A1, EDN1, HR, ZEB2, NFKB1, CBX1, REST, GLI3, TGFB1, CITED2, KCNIP3, EIF4EBP2, LOC100048295, STRA8, POU4F2, NRG1, MYC, TWIST2, KHDRBS1, ATF7IP, RARG, CTBP2, RCOR2, FOXJ1, PKIG, SOCS1, ZHX2, MLXIPL, SKP2, TLE4, TLE1, IRF2BP1, PKIA, PURB, FLNA, MXD4, JUN, HIPK2, ZFPM2, LCOR, MTDH, LIN28A, LIN28B, SUFU, SRRT, NPAS1, OVOL1, POU2F1, SKIL, DNMT3B, TDRD1, GCHFR, MDFI, BMP4, CEBPA,…	1363	534	14219	1.48472	0.776173	0.0132761	0.804155
GOTERM_BP_ALL	GO:0006468~protein amino acid phosphorylation	88	4.55016	0.000473735	NUAK2, NUAK1, CCNT1, CAD, C230081A13RIK, TGFB1, LATS2, D8ERTD82E, PAK6, CCNE1, PAK3, CDK12, TGFA, MLKL, CDK14, EGFR, RET, SGK2, MTAP2, PRKCH, RPS6KC1, CDK6, PKDCC, PRKCE, CDKL2, DAPK3, STK4, CDKL5, DAPK1, PRKCB, HUNK, DDR1, PLCE1, STYK1, ACVR2B, CDKL1, MAPK3, LCK, HIPK2, CFL1, ROR1, BMP2K, NRK, NEK4, MAP3K14, LRRK1, FGFR2, FGFR3, ERBB3, STK10, BMPR2, ABI2, BRSK1, MAPKAPK2, CD74, TRIB1, EPHB2, CAM…	1363	640	14219	1.43442	0.798713	0.0140859	0.860932
GOTERM_BP_ALL	GO:0045941~positive regulation of transcription	69	3.56774	0.000475399	GM98, E2F3, FOXK1, ARNT2, PAX6, FOXO1, NFKB1, GLI3, ZIC3, TGFB1, CITED2, GLI1, LOC100048295, GATA3, PAX8, POU4F2, MKL1, FOSL1, MYC, ATF7IP, RARG, EGR2, SOX11, OTX2, MLXIPL, RXRG, MED14, TCFAP2E, MECOM, SMO, ZFP462, JUN, ZMIZ1, HIPK2, ZFPM2, SMARCA1, HMGB2, UBE3A, SOX4, SRF, SOX8, ARID2, GM3258, NFAT5, POU2F1, ETV1, TCEA1, SUPT4H1, POU3F1, NFATC2, ETV4, HMGA1-RS1, BMP4, CEBPA, TRP53, KLF6, KLF7, U…	1363	475	14219	1.5154	0.799844	0.0140119	0.863943
GOTERM_BP_ALL	GO:0060541~respiratory system development	25	1.29266	0.000627688	FGFR2, FGF18, BMPR2, DAG1, GLI3, ADA, GLI1, SPRY2, SLC23A1, CHD7, POU2F1, HHIP, BMP4, CEBPA, RARG, TBX4, CFTR, MMP14, MYCN, KDR, TNS3, ACVR2B, ID1, LOC100047930, ZFPM2	1363	124	14219	2.10325	0.880464	0.0183012	1.1392
GOTERM_BP_ALL	GO:0050680~negative regulation of epithelial cell proliferation	10	0.517063	0.000627872	BMP4, FGFR3, PHB2, PAX6, LOC100047930, NKX3-1, PTEN, RUNX3, TGFB1, ETV4	1363	27	14219	3.86375	0.880538	0.0181502	1.13954
GOTERM_BP_ALL	GO:0040012~regulation of locomotion	23	1.18925	0.000655135	COL18A1, JUB, LOC100047211, IRS2, BCAR1, TLR2, PAX6, ITGB3, NEXN, PTEN, ADA, VCL, THY1, BBS2, PRR5, CORO1A, LAMA4, BCL2, TEK, LAMB1-1, HBEGF, ARHGAP8, ARAP3, TRIP6	1363	110	14219	2.18126	0.89107	0.0187707	1.18874
GOTERM_BP_ALL	GO:0016477~cell migration	40	2.06825	0.000709645	NRP2, JUB, CDK5R1, FGF15, BCAR1, PAX6, GJA1, ABI2, ZEB2, CX3CL1, ITGB1, PTEN, SRF, TGFB1, IL17B, GBX2, SEMA3C, LHX6, NRG1, DCLK1, TWIST1, EGFR, RET, VAV3, FOXJ1, PODXL, ITGA3, MMP14, KDR, SMO, TNS3, CORO1A, ITGA6, CD34, CFL1, LTB4R2, LRP6, HBEGF, LAMC1, MYH10	1363	240	14219	1.73869	0.909425	0.0201467	1.28704
GOTERM_BP_ALL	GO:0051173~positive regulation of nitrogen compound metabolic process	74	3.82627	0.000739714	HSP90AB1, GM98, E2F3, FOXK1, ARNT2, PAX6, TLR2, FOXO1, NFKB1, PNP, GLI3, TGFB1, ZIC3, RAET1B, CITED2, GLI1, RAET1A, LOC100048295, GATA3, PAX8, POU4F2, MKL1, FOSL1, MYC, ATF7IP, RARG, EGR2, SOX11, OTX2, MLXIPL, RXRG, MED14, TCFAP2E, MECOM, SMO, ZFP462, JUN, ZMIZ1, HIPK2, ZFPM2, SMARCA1, HMGB2, ADORA2B, UBE3A, SOX4, SRF, SOX8, ARID2, GM3258, NFAT5, POU2F1, ETV1, TCEA1, SUPT4H1, POU3F1, NFATC2, ETV4…	1363	526	14219	1.46764	0.918192	0.0208171	1.34123
GOTERM_BP_ALL	GO:0050794~regulation of cellular process	653	33.7642	0.000748285	DLC1, JUB, PTGS2, PGF, FSTL3, L1CAM, REST, CITED2, SYP, LPHN2, LPHN3, DIRAS1, CUL7, PPP1R1A, TIGD3, TIGD5, GNG3, RAB27A, PHOX2A, ICOSL, MAGI2, RCOR2, SKP2, ZHX2, RXRG, MED14, MECOM, CTNNA1, BCL2L11, THY1, GRB10, JUN, MAPK3, VGLL3, IGFBPL1, ERBB3, GNAI1, PTH1R, HSPA1A, HSPA1B, PFN1, 2610018G03RIK, ARG2, UBASH3A, ARNTL2, DNMT3B, DNMT3A, ODC1, UTF1, KLF12, RASEF, SFMBT2, RGS2, 9130019O22RIK, ARF3, P…	1363	6224	14219	1.0945	0.920532	0.0208822	1.35667
GOTERM_BP_ALL	GO:0043583~ear development	22	1.13754	0.000754761	FGFR2, FGFR3, TMIE, OTX2, EDN1, JAG2, FZD3, PRRX2, BCL2L11, GPR98, FZD6, DDR1, SPRY2, BDNF, CHD7, CHRNA9, BCL2, GBX2, COL11A1, MYC, TCF15, OTOP1	1363	104	14219	2.2068	0.922255	0.0208888	1.36833
GOTERM_BP_ALL	GO:0006793~phosphorus metabolic process	112	5.79111	0.000762636	C230081A13RIK, TGFB1, MLKL, EGFR, RET, PTPRF, RPS6KC1, PTPRU, PTPRN, CDKL2, STK4, CDKL5, PLCE1, CDKL1, MAPK3, ROR1, BMP2K, NEK4, LRRK1, FGFR2, LOC100045551, FGFR3, ERBB3, STK10, SSH2, BMPR2, MAPKAPK2, CD74, EPHB2, CAMKV, 2610018G03RIK, SPNB2, TEK, TEC, MDFI, GPD2, PTPN9, SMAD7, PTPN4, PTPN14, MOBKL1A, PTPN13, TRIO, EPHA1, EPHA2, PPA1, KDR, EPHA4, PLK5, IKBKE, PLK2, DUSP26, DUSP27, PTPN1, GRK5, NU…	1363	866	14219	1.34919	0.9243	0.0209334	1.38252
GOTERM_BP_ALL	GO:0006796~phosphate metabolic process	112	5.79111	0.000762636	C230081A13RIK, TGFB1, MLKL, EGFR, RET, PTPRF, RPS6KC1, PTPRU, PTPRN, CDKL2, STK4, CDKL5, PLCE1, CDKL1, MAPK3, ROR1, BMP2K, NEK4, LRRK1, FGFR2, LOC100045551, FGFR3, ERBB3, STK10, SSH2, BMPR2, MAPKAPK2, CD74, EPHB2, CAMKV, 2610018G03RIK, SPNB2, TEK, TEC, MDFI, GPD2, PTPN9, SMAD7, PTPN4, PTPN14, MOBKL1A, PTPN13, TRIO, EPHA1, EPHA2, PPA1, KDR, EPHA4, PLK5, IKBKE, PLK2, DUSP26, DUSP27, PTPN1, GRK5, NU…	1363	866	14219	1.34919	0.9243	0.0209334	1.38252
GOTERM_BP_ALL	GO:0001841~neural tube formation	14	0.723888	0.000801451	DLC1, ENAH, SHROOM3, LMO4, FZD3, ZEB2, SUFU, FZD6, PFN1, CFL1, CASP8, NUP50, GRLF1, TWIST1	1363	51	14219	2.86372	0.933622	0.0218106	1.45239
GOTERM_BP_ALL	GO:0045893~positive regulation of transcription, DNA-dependent	61	3.15408	0.000828342	GM98, E2F3, FOXK1, ARNT2, PAX6, FOXO1, NFKB1, ZIC3, TGFB1, CITED2, GLI1, LOC100048295, GATA3, PAX8, POU4F2, FOSL1, MYC, ATF7IP, RARG, EGR2, SOX11, OTX2, RXRG, MLXIPL, MED14, TCFAP2E, MECOM, SMO, ZFP462, ZMIZ1, JUN, HIPK2, ZFPM2, SMARCA1, HMGB2, UBE3A, SOX4, SRF, SOX8, ARID2, POU2F1, NFAT5, TCEA1, POU3F1, NFATC2, BMP4, CEBPA, TRP53, KLF6, KLF7, UTF1, KLF12, MAML1, CREBBP, TEAD3, SALL4, ETS1, CSRNP…	1363	416	14219	1.52971	0.939399	0.0223547	1.50078
GOTERM_BP_ALL	GO:0045944~positive regulation of transcription from RNA polymerase II promoter	54	2.79214	0.000890863	ARNT2, PAX6, FOXO1, NFKB1, ZIC3, TGFB1, CITED2, GLI1, LOC100048295, GATA3, PAX8, POU4F2, MYC, FOSL1, RARG, EGR2, SOX11, OTX2, RXRG, MLXIPL, MED14, TCFAP2E, MECOM, SMO, ZFP462, ZMIZ1, JUN, HIPK2, ZFPM2, HMGB2, UBE3A, SOX4, SOX8, ARID2, SRF, POU2F1, NFAT5, TCEA1, POU3F1, NFATC2, BMP4, CEBPA, TRP53, KLF6, UTF1, KLF12, MAML1, CREBBP, TEAD3, SALL4, ETS1, CSRNP1, NEUROD1, PBX1	1363	358	14219	1.57356	0.950961	0.0238325	1.61319
GOTERM_BP_ALL	GO:0051674~localization of cell	45	2.32678	0.000936395	NRP2, JUB, CDK5R1, FGF15, BCAR1, PAX6, GJA1, ABI2, ZEB2, DNAHC11, CX3CL1, SRF, ITGB1, PTEN, TGFB1, IL17B, RSPH4A, GBX2, SEMA3C, LHX6, CHRNA7, NRG1, DCLK1, TWIST1, EGFR, RET, VAV3, FOXJ1, PODXL, ATP1A3, ITGA3, MMP14, GAS8, KDR, SMO, TNS3, CORO1A, ITGA6, CD34, CFL1, LTB4R2, LRP6, HBEGF, LAMC1, MYH10	1363	284	14219	1.65298	0.957967	0.0248395	1.69497
GOTERM_BP_ALL	GO:0048870~cell motility	45	2.32678	0.000936395	NRP2, JUB, CDK5R1, FGF15, BCAR1, PAX6, GJA1, ABI2, ZEB2, DNAHC11, CX3CL1, SRF, ITGB1, PTEN, TGFB1, IL17B, RSPH4A, GBX2, SEMA3C, LHX6, CHRNA7, NRG1, DCLK1, TWIST1, EGFR, RET, VAV3, FOXJ1, PODXL, ATP1A3, ITGA3, MMP14, GAS8, KDR, SMO, TNS3, CORO1A, ITGA6, CD34, CFL1, LTB4R2, LRP6, HBEGF, LAMC1, MYH10	1363	284	14219	1.65298	0.957967	0.0248395	1.69497
GOTERM_BP_ALL	GO:0030323~respiratory tube development	23	1.18925	0.000955972	CEBPA, BMP4, FGFR2, FGF18, TBX4, BMPR2, DAG1, CFTR, MMP14, GLI3, ADA, KDR, MYCN, GLI1, SPRY2, TNS3, SLC23A1, ACVR2B, ID1, LOC100047930, ZFPM2, HHIP, TRAF4	1363	113	14219	2.12335	0.960663	0.0251554	1.73012
GOTERM_BP_ALL	GO:0051254~positive regulation of RNA metabolic process	61	3.15408	0.000993049	GM98, E2F3, FOXK1, ARNT2, PAX6, FOXO1, NFKB1, ZIC3, TGFB1, CITED2, GLI1, LOC100048295, GATA3, PAX8, POU4F2, FOSL1, MYC, ATF7IP, RARG, EGR2, SOX11, OTX2, RXRG, MLXIPL, MED14, TCFAP2E, MECOM, SMO, ZFP462, ZMIZ1, JUN, HIPK2, ZFPM2, SMARCA1, HMGB2, UBE3A, SOX4, SRF, SOX8, ARID2, POU2F1, NFAT5, TCEA1, POU3F1, NFATC2, BMP4, CEBPA, TRP53, KLF6, KLF7, UTF1, KLF12, MAML1, CREBBP, TEAD3, SALL4, ETS1, CSRNP…	1363	419	14219	1.51876	0.965305	0.0259172	1.79664
GOTERM_BP_ALL	GO:0010628~positive regulation of gene expression	69	3.56774	0.000999183	GM98, E2F3, FOXK1, ARNT2, PAX6, FOXO1, NFKB1, GLI3, ZIC3, TGFB1, CITED2, GLI1, LOC100048295, GATA3, PAX8, POU4F2, MKL1, FOSL1, MYC, ATF7IP, RARG, EGR2, SOX11, OTX2, MLXIPL, RXRG, MED14, TCFAP2E, MECOM, SMO, ZFP462, JUN, ZMIZ1, HIPK2, ZFPM2, SMARCA1, HMGB2, UBE3A, SOX4, SRF, SOX8, ARID2, GM3258, NFAT5, POU2F1, ETV1, TCEA1, SUPT4H1, POU3F1, NFATC2, ETV4, HMGA1-RS1, BMP4, CEBPA, TRP53, KLF6, KLF7, U…	1363	488	14219	1.47504	0.966018	0.0258758	1.80765
GOTERM_BP_ALL	GO:0045596~negative regulation of cell differentiation	32	1.6546	0.00110166	BEX1, PAX6, REST, GLI3, ITGB1, TGFB1, CD74, EPHB2, WNT4, BDNF, RHOC, MBNL3, SKIL, TWIST2, TWIST1, ZFP36, TRP53, BMP4, KLK8, FOXJ1, CREBBP, LMX1A, CTNNA1, THY1, NOTCH3, YWHAH, GDF11, PBX1, TGFB1I1, WNT9A, RBPJ, TOB2	1363	182	14219	1.83422	0.975983	0.028277	1.99129
GOTERM_BP_ALL	GO:0048754~branching morphogenesis of a tube	20	1.03413	0.00113976	BMP4, PGF, EDN1, DAG1, MMP14, GLI3, SRF, TGFB1, KDR, MYCN, DDR1, SPRY2, WNT4, BCL2, PHB2, GBX2, NKX3-1, PBX1, PLXND1, ETV4	1363	93	14219	2.24347	0.97889	0.029021	2.05948
GOTERM_BP_ALL	GO:0051129~negative regulation of cellular component organization	20	1.03413	0.00113976	KLK8, LOC100047211, MTAP2, MID1, MMP14, PTEN, TGFB1, EPHB2, ESPN, THY1, PFN1, PACSIN1, YWHAH, MTAP1A, SPNB2, SPNB1, CAPG, MTAP1B, SCIN, SPNA1	1363	93	14219	2.24347	0.97889	0.029021	2.05948
GOTERM_BP_ALL	GO:0051094~positive regulation of developmental process	36	1.86143	0.00115565	FGFR2, FGF18, FGFR3, BEX1, PAX6, GJA1, CX3CL1, GLI3, SRF, PNP, CD74, ADA, EPHB2, TAL1, METRN, BDNF, TIAM1, BCL2, POU4F2, NRG1, BMP4, SH3PXD2B, PLXNB1, CD276, VASH2, JUNB, SMO, WNT7B, TNFSF11, ID2, ETS1, LCK, WNT9A, NGFR, WNT7A, TOB2	1363	214	14219	1.75494	0.979996	0.0292003	2.08791
GOTERM_BP_ALL	GO:0045449~regulation of transcription	254	13.1334	0.00125292	CDX4, ZFP334, BBX, REST, 1700020N01RIK, CITED2, ZFP94, ZFP473, TIGD3, CREB3L1, TIGD5, TWIST2, TWIST1, PHOX2A, RARG, RCOR2, ZFP628, ZFP467, RXRG, ZHX2, MED14, MECOM, ZFP74, BAZ1A, ZFP462, JUN, PARP14, MAPK3, ZIM1, LOC100047930, CDCA7L, VGLL3, SUPT6H, ZFP619, ZFP618, PFN1, TAL1, TCF20, PBRM1, LHX6, ARNTL2, DNMT3B, NKRF, MDFI, BMP4, IKZF4, DNMT3A, KLF6, UTF1, KLF7, KLF12, SMAD7, SMAD6, MAML1, CREBBP…	1363	2227	14219	1.18983	0.985611	0.0313863	2.26175
GOTERM_BP_ALL	GO:0016055~Wnt receptor signaling pathway	25	1.29266	0.00125574	ZBTB33, SOX4, CPZ, WNT4, RSPO1, FRAT1, BCL9, FZD9, FZD1, TLE4, FZD3, TLE1, CELSR2, FZD2, FZD6, SMO, SDC1, WNT7B, SFRP2, SFRP4, LRP6, TGFB1I1, WNT9A, LOC634379, WNT7A	1363	130	14219	2.00618	0.985748	0.0312249	2.26679
GOTERM_BP_ALL	GO:0045935~positive regulation of nucleobase, nucleoside, nucleotide and nucleic acid metabolic process	71	3.67115	0.0012704	GM98, E2F3, FOXK1, ARNT2, PAX6, FOXO1, NFKB1, PNP, GLI3, TGFB1, ZIC3, CITED2, GLI1, LOC100048295, GATA3, PAX8, POU4F2, MKL1, FOSL1, MYC, ATF7IP, RARG, EGR2, SOX11, OTX2, MLXIPL, RXRG, MED14, TCFAP2E, MECOM, SMO, ZFP462, JUN, ZMIZ1, HIPK2, ZFPM2, SMARCA1, HMGB2, ADORA2B, UBE3A, SOX4, SRF, SOX8, ARID2, GM3258, NFAT5, POU2F1, ETV1, TCEA1, SUPT4H1, POU3F1, NFATC2, ETV4, HMGA1-RS1, BMP4, CEBPA, TRP53,…	1363	510	14219	1.45232	0.986438	0.0313535	2.29295
GOTERM_BP_ALL	GO:0006836~neurotransmitter transport	18	0.930714	0.00129244	SYT1, CPLX1, SLC25A4, NRXN2, SYT4, SLC6A15, PARK2, RIMS2, STX1B, RIMS4, RIMS3, SLC17A7, SYN1, SLC18A3, SV2A, SLC18A1, WNT7A, CACNA1B	1363	80	14219	2.34723	0.987414	0.0316584	2.3323
GOTERM_BP_ALL	GO:0001890~placenta development	19	0.98242	0.00130668	CEBPA, MDFI, HSP90AB1, FGFR2, EGFR, CDX4, EGLN1, ADA, JUNB, CITED2, DLX3, WNT7B, PEG10, GCM1, PBRM1, PLCD1, ETNK2, EPOR, CYR61	1363	87	14219	2.27828	0.988007	0.0317719	2.35771
GOTERM_BP_ALL	GO:0080090~regulation of primary metabolic process	299	15.4602	0.0014012	ADCY1, ADCY2, ADCY7, CDX4, ADCY6, ZFP334, EDN1, BBX, REST, 1700020N01RIK, CITED2, ZFP94, ZFP473, TIGD3, CREB3L1, RAPGEF4, TIGD5, TWIST2, TWIST1, PHOX2A, RARG, RCOR2, ZFP628, RXRG, ZFP467, ZHX2, MED14, MECOM, ZFP74, BAZ1A, ZFP462, JUN, PARP14, MAPK3, ZIM1, LOC100047930, CDCA7L, VGLL3, SUPT6H, PTH1R, IGF2BP1, ZFP619, ZFP618, PFN1, TAL1, TCF20, PBRM1, LHX6, ARNTL2, DNMT3B, NKRF, MDFI, BMP4, IKZF4, D…	1363	2672	14219	1.16737	0.991293	0.0337898	2.52621
GOTERM_BP_ALL	GO:0014020~primary neural tube formation	12	0.620476	0.00156874	DLC1, PFN1, ENAH, SHROOM3, LMO4, CFL1, GRLF1, ZEB2, FZD3, SUFU, FZD6, TWIST1	1363	42	14219	2.98061	0.995064	0.0374894	2.82418
GOTERM_BP_ALL	GO:0010556~regulation of macromolecule biosynthetic process	269	13.909	0.00159517	CDX4, ZFP334, BBX, REST, 1700020N01RIK, CITED2, ZFP94, ZFP473, TIGD3, CREB3L1, TIGD5, TWIST2, TWIST1, PHOX2A, ICOSL, RARG, RCOR2, ZFP628, RXRG, ZFP467, ZHX2, MED14, MECOM, ZFP74, BAZ1A, ZFP462, JUN, PARP14, MAPK3, ZIM1, LOC100047930, CDCA7L, VGLL3, SUPT6H, IGF2BP1, ZFP619, ZFP618, PFN1, TAL1, TCF20, PBRM1, LHX6, ARNTL2, DNMT3B, NKRF, MDFI, BMP4, IKZF4, DNMT3A, KLF6, UTF1, KLF7, KLF12, SMAD7, SMAD…	1363	2381	14219	1.1786	0.995487	0.0378424	2.87112
GOTERM_BP_ALL	GO:0031324~negative regulation of cellular metabolic process	68	3.51603	0.00167115	FOXK1, CDX4, RBM15B, NR6A1, EDN1, HR, ZEB2, NFKB1, REST, CBX1, GLI3, TGFB1, CITED2, KCNIP3, EIF4EBP2, LOC100048295, STRA8, POU4F2, NRG1, MYC, TWIST2, KHDRBS1, ATF7IP, RARG, CTBP2, RCOR2, FOXJ1, PKIG, SOCS1, ZHX2, MLXIPL, TLE4, TLE1, IRF2BP1, PKIA, PURB, MXD4, JUN, HIPK2, ZFPM2, LCOR, MTDH, SUFU, NPAS1, OVOL1, POU2F1, SKIL, DNMT3B, MDFI, CEBPA, TRP53, IKZF4, DNMT3A, EHMT1, KLF12, JARID2, FZD1, CD2…	1363	489	14219	1.45069	0.996511	0.0393349	3.00591
GOTERM_BP_ALL	GO:0030324~lung development	22	1.13754	0.00179625	CEBPA, BMP4, FGFR2, FGF18, TBX4, BMPR2, DAG1, CFTR, MMP14, GLI3, ADA, KDR, MYCN, GLI1, SPRY2, TNS3, SLC23A1, ACVR2B, ID1, LOC100047930, ZFPM2, HHIP	1363	111	14219	2.06763	0.997717	0.0419278	3.22744
GOTERM_BP_ALL	GO:0048762~mesenchymal cell differentiation	13	0.672182	0.00183284	NRP2, FGFR2, SMO, RET, FGF15, BCL2, CFL1, EDN1, GBX2, SEMA3C, ZEB2, RBPJ, TGFB1	1363	49	14219	2.76771	0.997983	0.0424715	3.29215
GOTERM_BP_ALL	GO:0001654~eye development	28	1.44778	0.00193502	PAX6, ABI2, NHS, GLI3, TGFB1, EPHB2, MIP, LOC100048295, CHD7, PVRL1, POU2F1, POU4F2, SKIL, COL8A2, GNAT1, BMP4, RARG, BHLHE22, OTX2, CACNA1S, GNAT2, THY1, MIAT, GDF11, LRP6, GRLF1, NEUROD1, MYH10	1363	157	14219	1.86051	0.998573	0.0444839	3.47265
GOTERM_BP_ALL	GO:0065008~regulation of biological quality	137	7.08376	0.00198196	SYT1, SLC9A7, SYT4, PTGS2, EDN1, GNA12, CRABP2, ILDR2, TGFB1, SYP, WNT4, BDNF, GRIN2D, CHRNA7, RAPGEF4, SLC4A4, RAB27A, STIM2, F8, MLXIPL, MYH6, MECOM, BCL2L11, RPS19, CPE, F5, PDE5A, HSD11B2, ABAT, EMP3, AKAP2, KCNMB4, LOC100047211, ADORA2B, RBP1, TMX4, PTH1R, BMPR2, SOX4, HSPA1A, HSPA1B, RIMS2, SRF, ADA, EPHB2, PFN1, TAL1, ECE1, PROCR, SPNB2, TRO, SPNB1, SKIL, TRP53, BMP4, TRPC1, SMAD7, ACACA, …	1363	1123	14219	1.27266	0.998783	0.0452321	3.55545
GOTERM_BP_ALL	GO:0031325~positive regulation of cellular metabolic process	85	4.39504	0.00201792	HSP90AB1, GM98, E2F3, FOXK1, ARNT2, TLR2, PAX6, FOXO1, TLR3, EIF5A, NFKB1, PNP, GLI3, TGFB1, ZIC3, RAET1B, CITED2, GLI1, RAET1A, LOC100048295, GATA3, PAX8, POU4F2, MKL1, FOSL1, MYC, LTB, SPN, GHR, ATF7IP, ICOSL, EGR2, RARG, SOX11, OTX2, MLXIPL, RXRG, MED14, TCFAP2E, MECOM, SMO, ZFP462, JUN, ZMIZ1, HIPK2, ZFPM2, SMARCA1, HMGB2, FGFR3, ADORA2B, UBE3A, BMPR2, SOX4, LIN28A, SRF, ARID2, SOX8, GM3258, …	1363	644	14219	1.37691	0.998923	0.0457265	3.61885
GOTERM_BP_ALL	GO:0007160~cell-matrix adhesion	13	0.672182	0.00220522	DLC1, JUB, ITGB3, COL5A3, ITGB1, BCL2L11, THY1, ARHGAP6, SNED1, ITGA6, ITGB8, BCL2, TEK	1363	50	14219	2.71236	0.999429	0.0495371	3.94839
GOTERM_BP_ALL	GO:0060485~mesenchyme development	13	0.672182	0.00220522	NRP2, FGFR2, SMO, RET, FGF15, BCL2, CFL1, EDN1, GBX2, SEMA3C, ZEB2, RBPJ, TGFB1	1363	50	14219	2.71236	0.999429	0.0495371	3.94839
GOTERM_BP_ALL	GO:0034330~cell junction organization	10	0.517063	0.00242398	DLC1, JUB, ARHGAP6, ITGA5, BCL2, GNPAT, LAMC1, ITGB3, CTNNA1, THY1	1363	32	14219	3.26004	0.999728	0.0539642	4.33193
GOTERM_BP_ALL	GO:0043687~post-translational protein modification	129	6.67011	0.00251962	GNA14, C230081A13RIK, TGFB1, MLKL, EGFR, RET, PTPRF, SKP2, RPS6KC1, PTPRU, PTPRN, CDKL2, STK4, CDKL5, PLCE1, CDKL1, TRIM32, MAPK3, ROR1, BMP2K, NEK4, LRRK1, USP17L5, FGFR2, LOC100045551, FGFR3, ERBB3, STK10, SSH2, BMPR2, UBE2V1, MAPKAPK2, CD74, EPHB2, CAMKV, 2610018G03RIK, SPNB2, TEK, TEC, MDFI, PTPN9, EHMT1, SMAD7, CREBBP, PTPN4, PTPN14, MOBKL1A, PTPN13, TRIO, EPHA1, EPHA2, KDR, EPHA4, PLK5, IKB…	1363	1055	14219	1.27559	0.999803	0.0556699	4.49917
GOTERM_BP_ALL	GO:0006470~protein amino acid dephosphorylation	22	1.13754	0.00252379	LOC100045551, PTPN9, PTPRF, PTPRZ1, SSH2, PTPN4, PTPN14, PTPN13, PTPRU, PTPRN, PTEN, DUSP5, PPM1G, DUSP3, DUSP2, DUSP26, DUSP27, BCL2, PTPN1, DUSP9, DUSP8, DUSP6	1363	114	14219	2.01322	0.999806	0.0553982	4.50644
GOTERM_BP_ALL	GO:0060255~regulation of macromolecule metabolic process	298	15.4085	0.00254522	CDX4, ZFP334, BBX, REST, 1700020N01RIK, CITED2, ZFP94, ZFP473, TIGD3, CREB3L1, RAPGEF4, TIGD5, TWIST2, TWIST1, PHOX2A, ICOSL, RARG, RCOR2, ZFP628, SKP2, RXRG, ZFP467, ZHX2, MED14, MECOM, ZFP74, BAZ1A, ZFP462, JUN, PARP14, MAPK3, ZIM1, LOC100047930, CDCA7L, VGLL3, SUPT6H, IGF2BP1, ZFP619, ZFP618, PFN1, TAL1, TCF20, PBRM1, LHX6, ARNTL2, DNMT3B, TDRD1, NKRF, MDFI, BMP4, IKZF4, DNMT3A, KLF6, UTF1, KL…	1363	2688	14219	1.15654	0.99982	0.0554965	4.54388
GOTERM_BP_ALL	GO:0007178~transmembrane receptor protein serine/threonine kinase signaling pathway	17	0.879007	0.00259878	TRP53, BMP4, LTBP1, SMAD7, SMAD6, BMPR2, TGFB1, MSX2, ACVR2B, ID1, SPNB2, HIPK2, SKIL, AKAP2, BMP8B, BMP6, BMP8A	1363	78	14219	2.27367	0.99985	0.0562702	4.63737
GOTERM_BP_ALL	GO:0043010~camera-type eye development	24	1.24095	0.00278414	BMP4, BHLHE22, PAX6, ABI2, NHS, GLI3, CACNA1S, TGFB1, EPHB2, THY1, GNAT2, MIP, LOC100048295, CHD7, PVRL1, LRP6, GRLF1, POU2F1, GDF11, POU4F2, NEUROD1, SKIL, COL8A2, MYH10	1363	130	14219	1.92593	0.99992	0.0597847	4.96024
GOTERM_BP_ALL	GO:0065009~regulation of molecular function	73	3.77456	0.00282532	JUB, ADCY1, ADCY2, ADCY7, ADCY6, EDN1, TLR2, TLR3, ZEB2, LATS2, SPRY4, TGFB1, SPRY2, ARHGAP6, GPR44, HMOX1, SH3D20, SPRED2, SPRED3, TGFA, SPRED1, NRG1, MYC, DHCR24, PTGER4, FOXJ1, PKIG, STIM2, MYH6, PKIA, FLNA, JMY, THY1, SMO, PLCE1, ACVR2B, CHRM4, ZFP462, LCK, HIPK2, MAPK3, GRM6, NRK, GADD45A, CALCR, HMGB2, MTDH, ADORA2B, PTH1R, HSPA1A, SFN, HSPA1B, CD74, TRIB1, RASGRP3, ARG2, BCL2, MDFI, TRP53,…	1363	544	14219	1.3999	0.99993	0.060261	5.03183
GOTERM_BP_ALL	GO:0035023~regulation of Rho protein signal transduction	18	0.930714	0.00292974	FGD2, VAV3, FOXJ1, PREX2, ARHGEF5, TRIO, AKAP13, ARHGEF17, ARHGEF9, RGNEF, ARHGEF10, PLEKHG2, TIAM1, SH3D20, ARAP3, FGD5, SPATA13, E130112L23RIK	1363	86	14219	2.18347	0.999951	0.0620305	5.21313
GOTERM_BP_ALL	GO:0007417~central nervous system development	53	2.74043	0.00293921	DLC1, GM98, ARNT2, PAX6, ZEB2, GLI3, PTEN, CITED2, GLI1, SLC23A1, GNPAT, SEPP1, PHOX2A, EGFR, IRS2, C2CD3, EGR2, CYP11A1, OTX2, MECOM, BBS2, SMO, NGFR, SMARCA1, FGFR2, CDK5R1, FGFR3, SOX3, SUFU, EPHB2, TPM3, BCL2, GBX2, LHX6, DCLK1, BMP4, TRP53, HSPG2, EN1, LMX1A, RGNEF, NOTCH3, GCM1, PHGDH, GDF11, GRLF1, NEUROD1, EPOR, PBX3, RBPJ, LRP2, WNT7A, MYH10	1363	369	14219	1.49838	0.999953	0.0618386	5.22956
GOTERM_BP_ALL	GO:0030855~epithelial cell differentiation	23	1.18925	0.00295962	COL18A1, FGFR2, SHROOM3, PTGS2, PPHLN1, PAX6, FZD1, GJA1, FZD2, SFN, KDR, WNT4, LOC100048295, EVPL, ID1, PPL, JUN, TGM1, TGM3, TGFB1I1, ID3, POU3F1, RBPJ	1363	123	14219	1.95072	0.999956	0.0618709	5.26495
GOTERM_BP_ALL	GO:0001843~neural tube closure	11	0.568769	0.00300429	DLC1, PFN1, ENAH, SHROOM3, LMO4, GRLF1, ZEB2, FZD3, SUFU, FZD6, TWIST1	1363	39	14219	2.9424	0.999962	0.0623915	5.34237
GOTERM_BP_ALL	GO:0060606~tube closure	11	0.568769	0.00300429	DLC1, PFN1, ENAH, SHROOM3, LMO4, GRLF1, ZEB2, FZD3, SUFU, FZD6, TWIST1	1363	39	14219	2.9424	0.999962	0.0623915	5.34237
GOTERM_BP_ALL	GO:0043086~negative regulation of catalytic activity	20	1.03413	0.00309877	CFLAR, PKIG, HSPA1A, HSPA1B, PKIA, LATS2, SPRY4, FLNA, THY1, SH3BP5, SPRY2, CHRM4, GPR44, ARG2, GRM6, SPRED2, SPRED3, SPRED1, DUSP9, GADD45A, DHCR24	1363	101	14219	2.06577	0.999972	0.063901	5.50592
GOTERM_BP_ALL	GO:0045165~cell fate commitment	26	1.34436	0.00324943	FGFR2, JAG2, PAX6, ITGB1, SOX8, GLI3, SPRY2, TAL1, BCL2, GATA3, POU2F1, LHX6, NRG1, TRP53, BMP4, OTX2, DLL3, FOXN4, KDR, NOTCH3, SMO, GCM1, NEUROD1, TGFB1I1, RBPJ, GAP43	1363	147	14219	1.84514	0.999983	0.0665025	5.76617
GOTERM_BP_ALL	GO:0042306~regulation of protein import into nucleus	8	0.41365	0.00341678	SMO, PKIG, TRIP6, PKIA, GLI3, TGFB1, SUFU, FLNA	1363	22	14219	3.7935	0.999991	0.0693925	6.05445
GOTERM_BP_ALL	GO:0048592~eye morphogenesis	16	0.827301	0.00342816	GNAT1, BMP4, RARG, BHLHE22, OTX2, PAX6, GLI3, EPHB2, GNAT2, THY1, PVRL1, MIAT, LRP6, POU2F1, GDF11, COL8A2	1363	73	14219	2.2865	0.999991	0.0692013	6.07403
GOTERM_BP_ALL	GO:0040011~locomotion	52	2.68873	0.00360815	NRP2, JUB, FGF15, BCAR1, PAX6, GJA1, ZEB2, PTEN, TGFB1, ROBO1, RSPH4A, GPR44, SEMA3C, CHRNA7, NRG1, TWIST1, CYR61, EGFR, RET, FOXJ1, MMP14, TNS3, SMO, CD34, CFL1, LAMC1, CDK5R1, CYSLTR1, ENPP2, ABI2, DNAHC11, CX3CL1, ITGB1, SRF, DOCK2, IL17B, GBX2, LHX6, DCLK1, VAV3, PODXL, ATP1A3, ITGA3, GAS8, KDR, CORO1A, ITGA6, ECSCR, LTB4R2, LRP6, HBEGF, MYH10	1363	364	14219	1.4903	0.999995	0.0722761	6.3831
GOTERM_BP_ALL	GO:0008544~epidermis development	23	1.18925	0.00363055	FRAS1, EGFR, PTGS2, PPHLN1, PAX6, SFN, COL5A2, SUFU, COL5A1, EVPL, PPL, BCL2, OVOL1, TGM1, TGM3, NGFR, POU3F1, RBPJ, WNT7A, LTB, RUNX3, TCF15, DHCR24	1363	125	14219	1.91951	0.999995	0.072282	6.4215
GOTERM_BP_ALL	GO:0001763~morphogenesis of a branching structure	23	1.18925	0.00363055	FGFR2, BMP4, PGF, EDN1, DAG1, MMP14, GLI3, SRF, TGFB1, KDR, MYCN, DDR1, SPRY2, WNT4, GCM1, BCL2, PHB2, GBX2, NKX3-1, SEMA3C, PBX1, PLXND1, ETV4	1363	125	14219	1.91951	0.999995	0.072282	6.4215
GOTERM_BP_ALL	GO:0051128~regulation of cellular component organization	48	2.4819	0.00369029	STON2, LOC100047211, SHROOM3, STON1, GNA12, EIF5A, SRF, PTEN, TGFB1, EPHB2, ESPN, PFN1, METRN, PACSIN1, CUL7, TIAM1, SPNB2, SPNB1, TGFA, LTB, ATF7IP, TRP53, KLK8, ACTN4, PLXNB1, MTAP2, NEXN, MMP14, MID1, COL5A1, THY1, CORO1A, YWHAH, MTAP1A, CFL1, ITGA7, MTAP1B, SCIN, CAPG, GRLF1, SPNA1, MYH14, NCAN, BIN1, ARAP3, AKAP2, WNT7A, MYH10	1363	330	14219	1.5174	0.999996	0.0730003	6.52383
GOTERM_BP_ALL	GO:0060348~bone development	22	1.13754	0.00386687	FGFR2, BMP4, FGF18, BMP1, RARG, PDLIM7, PTGS2, PTH1R, HSPG2, MMP14, MMP2, SMO, TNFSF11, BCL2, ANKRD11, PTN, SORT1, PAPSS2, RPS27A, BMP8B, BMP6, BMP8A	1363	118	14219	1.94497	0.999998	0.075921	6.82568
GOTERM_BP_ALL	GO:0003007~heart morphogenesis	16	0.827301	0.00392776	DLC1, C2CD3, SMAD7, GJA1, EGLN1, SRF, TPM1, SUFU, ZIC3, COL5A1, MSX2, SMO, CHD7, ZMIZ1, ADAMTS1, COL11A1	1363	74	14219	2.2556	0.999998	0.0766282	6.92956
GOTERM_BP_ALL	GO:0010604~positive regulation of macromolecule metabolic process	82	4.23992	0.00405091	GM98, E2F3, FOXK1, ARNT2, PAX6, FOXO1, EIF5A, TLR3, NFKB1, PNP, GLI3, TGFB1, ZIC3, CITED2, GLI1, LOC100048295, GATA3, PAX8, POU4F2, MKL1, FOSL1, MYC, LTB, SPN, GHR, ATF7IP, ICOSL, EGR2, RARG, SOX11, OTX2, MLXIPL, RXRG, MED14, TCFAP2E, MECOM, SMO, ZFP462, JUN, ZMIZ1, TRIM32, HIPK2, ZFPM2, SMARCA1, HMGB2, FGFR3, UBE3A, BMPR2, SOX4, LIN28A, SRF, SOX8, ARID2, GM3258, BCL2, NFAT5, POU2F1, ETV1, TCEA1,…	1363	633	14219	1.3514	0.999999	0.0784871	7.1393
GOTERM_BP_ALL	GO:0014031~mesenchymal cell development	12	0.620476	0.00409451	NRP2, SMO, RET, FGF15, BCL2, EDN1, CFL1, GBX2, SEMA3C, ZEB2, RBPJ, TGFB1	1363	47	14219	2.66352	0.999999	0.0788489	7.21346
GOTERM_BP_ALL	GO:0048041~focal adhesion formation	5	0.258532	0.00427784	DLC1, JUB, ARHGAP6, BCL2, THY1	1363	8	14219	6.52008	0.999999	0.0817739	7.52464
GOTERM_BP_ALL	GO:0007267~cell-cell signaling	43	2.22337	0.0043393	FGFR2, SYT1, CPLX1, SYT4, GJA1, CACNB2, ILDR2, RIMS2, VGF, GLI1, SYP, WNT4, BDNF, SYN1, GRIN2D, POU2F1, APBA2, CHRNA7, RAPGEF4, SV2A, NRG1, BMP4, KLK8, NRXN2, SLC25A4, STXBP1, FZD1, PARK2, GRIA4, FZD2, STX1B, SLC17A7, SMO, WNT7B, ACVR2B, STAB1, GRM6, TMOD2, ABAT, NCAN, WNT7A, SMPD3, CACNA1B	1363	290	14219	1.54683	1	0.0824369	7.62875
GOTERM_BP_ALL	GO:0051272~positive regulation of cell motion	11	0.568769	0.0044432	COL18A1, PRR5, CORO1A, IRS2, ACTN4, BCL2, BCAR1, LAMB1-1, TLR2, HBEGF, ARHGAP8, TRIP6	1363	41	14219	2.79887	1	0.0838602	7.80448
GOTERM_BP_ALL	GO:0001755~neural crest cell migration	8	0.41365	0.00451141	NRP2, SMO, RET, FGF15, CFL1, GBX2, SEMA3C, ZEB2	1363	23	14219	3.62857	1	0.0846236	7.91968
GOTERM_BP_ALL	GO:0030326~embryonic limb morphogenesis	19	0.98242	0.00456692	BMP4, RARG, C2CD3, TBX4, GNA12, CRABP2, EN1, PRRX2, MECOM, GLI3, MSX2, SALL4, CHD7, ZFP697, LRP6, PBX1, WNT9A, WNT7A, TWIST1	1363	97	14219	2.04341	1	0.0851506	8.01332
GOTERM_BP_ALL	GO:0035113~embryonic appendage morphogenesis	19	0.98242	0.00456692	BMP4, RARG, C2CD3, TBX4, GNA12, CRABP2, EN1, PRRX2, MECOM, GLI3, MSX2, SALL4, CHD7, ZFP697, LRP6, PBX1, WNT9A, WNT7A, TWIST1	1363	97	14219	2.04341	1	0.0851506	8.01332
GOTERM_BP_ALL	GO:0045597~positive regulation of cell differentiation	29	1.49948	0.00468851	FGF18, FGFR3, BEX1, PAX6, GLI3, SRF, PNP, ADA, CD74, EPHB2, TAL1, BDNF, METRN, TIAM1, BCL2, POU4F2, NRG1, SH3PXD2B, BMP4, PLXNB1, CD276, JUNB, SMO, WNT7B, TNFSF11, ID2, ETS1, LCK, WNT9A	1363	175	14219	1.72875	1	0.0868441	8.21813
GOTERM_BP_ALL	GO:0009893~positive regulation of metabolic process	87	4.49845	0.00483639	HSP90AB1, GM98, E2F3, FOXK1, ARNT2, TLR2, PAX6, FOXO1, TLR3, EIF5A, NFKB1, PNP, GLI3, TGFB1, ZIC3, RAET1B, CITED2, GLI1, RAET1A, LOC100048295, GATA3, PAX8, POU4F2, MKL1, FOSL1, MYC, LTB, SPN, GHR, ATF7IP, ICOSL, EGR2, RARG, SOX11, OTX2, MLXIPL, RXRG, MED14, TCFAP2E, MECOM, SMO, ZFP462, JUN, ZMIZ1, TRIM32, HIPK2, ZFPM2, SMARCA1, HMGB2, FGFR3, ADORA2B, UBE3A, BMPR2, SOX4, LIN28A, SRF, ARID2, SOX8, …	1363	683	14219	1.32884	1	0.0889783	8.46665
GOTERM_BP_ALL	GO:0051494~negative regulation of cytoskeleton organization	12	0.620476	0.0048618	PFN1, LOC100047211, MTAP2, SPNB2, MTAP1A, SPNB1, SCIN, CAPG, MTAP1B, SPNA1, MID1, ESPN	1363	48	14219	2.60803	1	0.0889434	8.50929
GOTERM_BP_ALL	GO:0001701~in utero embryonic development	40	2.06825	0.00505186	FGFR2, EDN1, GNA12, ARNT2, GJA1, EGLN1, GLI3, TPM1, ITGB1, SOX8, SRF, ADA, CITED2, CHD7, DNMT3L, ANKRD11, APBA2, ETNK2, PLCD1, SKIL, CYR61, ENO1, CEBPA, EGFR, TRP53, MDFI, C2CD3, GM5506, DLL3, MYH6, CAPN2, MECOM, JUNB, BCL2L11, WNT7B, GCM1, SALL4, ZMIZ1, HBEGF, ZFPM2, MYH10	1363	267	14219	1.56287	1	0.0917694	8.82761
GOTERM_BP_ALL	GO:0008277~regulation of G-protein coupled receptor protein signaling pathway	8	0.41365	0.00585103	PLD2, PLCE1, LOC100046186, ECE1, ARRB1, GPR44, TMOD2, GRK5	1363	24	14219	3.47738	1	0.104977	10.1547
GOTERM_BP_ALL	GO:0050678~regulation of epithelial cell proliferation	14	0.723888	0.00599161	EGFR, FGFR2, BMP4, FGFR3, PHB2, PAX6, NKX3-1, LOC100047930, TGFA, PTEN, RUNX3, TGFB1, ETV4, KDR	1363	63	14219	2.31825	1	0.106803	10.3863
GOTERM_BP_ALL	GO:0016337~cell-cell adhesion	36	1.86143	0.00601523	CDK5R1, CLSTN3, CLDN6, CLDN5, L1CAM, CDH3, PVRL4, PCDH1, CDH9, PVRL1, FAT1, BCL2, PVRL2, TEK, ESAM, ADAM8, COL11A1, CDH24, CYR61, RET, PTPRF, CELSR2, PTPRU, PCDH17, GPR98, THY1, AMIGO2, WNT7B, ITGA6, PKP2, ITGA5, CLDN1, CYFIP2, NCAN, CDH10, CDH11	1363	236	14219	1.59134	1	0.106642	10.4251
GOTERM_BP_ALL	GO:0043244~regulation of protein complex disassembly	11	0.568769	0.0063757	MTAP2, SPNB2, MTAP1A, SPNB1, CFL1, SCIN, CAPG, MTAP1B, EIF5A, SPNA1, MID1	1363	43	14219	2.66869	1	0.112095	11.016
GOTERM_BP_ALL	GO:0001666~response to hypoxia	14	0.723888	0.00687603	ACTN4, ARNT2, EDN1, CAPN2, MMP14, MMP2, TGFB1, SCAP, CITED2, ECE1, HMOX1, BCL2, PDE5A, HIF3A	1363	64	14219	2.28203	1	0.119752	11.8301
GOTERM_BP_ALL	GO:0031589~cell-substrate adhesion	13	0.672182	0.00688389	DLC1, JUB, ITGB3, COL5A3, ITGB1, BCL2L11, THY1, ARHGAP6, SNED1, ITGA6, ITGB8, BCL2, TEK	1363	57	14219	2.37926	1	0.11927	11.8428
GOTERM_BP_ALL	GO:0016044~membrane organization	40	2.06825	0.00689142	STON2, CAV2, STON1, UBE3A, GULP1, SYP, AP1S3, DOCK2, PACSIN1, DYSF, BCL2, SH3D20, DLG4, GNPAT, CHRNA7, EHD1, EHD2, UPK2, DHCR24, GHR, MRC1, TRP53, PLD2, ARC, VAV3, HCK, MRC2, STXBP1, ITGA3, KCNN4, TIMM8A1, IRF8, LRP6, SH3KBP1, RIN2, SORT1, BIN1, LRP2, CLCN5, MYH10	1363	272	14219	1.53414	1	0.118787	11.855
GOTERM_BP_ALL	GO:0030335~positive regulation of cell migration	10	0.517063	0.00695535	COL18A1, PRR5, CORO1A, IRS2, BCL2, BCAR1, LAMB1-1, TLR2, HBEGF, ARHGAP8, TRIP6	1363	37	14219	2.8195	1	0.11922	11.9585
GOTERM_BP_ALL	GO:0051051~negative regulation of transport	15	0.775595	0.00766557	PFKL, EDN1, PKIG, STIM2, PEA15A, PKIA, ADA, FLNA, SUFU, TGFB1, PACSIN1, GRB10, BCL2, HMOX1, LTB	1363	72	14219	2.17336	1	0.129956	13.1005
GOTERM_BP_ALL	GO:0007398~ectoderm development	23	1.18925	0.00771229	FRAS1, EGFR, PTGS2, PPHLN1, PAX6, SFN, COL5A2, SUFU, COL5A1, EVPL, PPL, BCL2, OVOL1, TGM1, TGM3, NGFR, POU3F1, RBPJ, WNT7A, LTB, RUNX3, TCF15, DHCR24	1363	133	14219	1.80405	1	0.130049	13.1751
GOTERM_BP_ALL	GO:0006575~cellular amino acid derivative metabolic process	24	1.24095	0.00775102	ODC1, KYNU, OCLN, SNCB, GATM, EIF5A, GSTT1, PARK2, MOXD1, SLC1A3, HDC, GSTK1, GATA3, GPX3, PHGDH, PEMT, ABAT, ETNK2, CHRNA7, SMS, FABP5, MGST1, ALDH9A1, GHR	1363	141	14219	1.77568	1	0.130015	13.2369
GOTERM_BP_ALL	GO:0007610~behavior	55	2.84385	0.00777369	NRP2, ADCY1, CNP, KCNIP3, S1PR2, BDNF, SLC1A3, ROBO1, GRIN2D, GPR44, DLG4, CHRNA7, SEPP1, NRG1, CYR61, EGR2, CYP11A1, EFNB3, PRKCE, BBS2, HIPK2, GRM6, LAMB1-1, ABAT, CYSLTR1, ENPP2, ABI2, CX3CL1, EPHB2, ESPN, NPAS1, DOCK2, CHD7, IL17B, BCL2, SCN9A, APBA2, ETV1, PTN, FZD9, KLK8, GABRA5, ATP1A3, ITGA3, PARK2, ACCN2, EPHA4, CORO1A, PENK, ITGA5, ECSCR, TMOD2, PBX3, TCF15, CACNA1B	1363	405	14219	1.41671	1	0.129731	13.2731
GOTERM_BP_ALL	GO:0070482~response to oxygen levels	14	0.723888	0.0078608	ACTN4, ARNT2, EDN1, CAPN2, MMP14, MMP2, TGFB1, SCAP, CITED2, ECE1, HMOX1, BCL2, PDE5A, HIF3A	1363	65	14219	2.24692	1	0.130451	13.4119
GOTERM_BP_ALL	GO:0033673~negative regulation of kinase activity	12	0.620476	0.00786217	SH3BP5, SPRY2, PKIG, SPRED2, SPRED3, SPRED1, DUSP9, PKIA, GADD45A, LATS2, SPRY4, THY1	1363	51	14219	2.45462	1	0.129839	13.4141
GOTERM_BP_ALL	GO:0006469~negative regulation of protein kinase activity	12	0.620476	0.00786217	SH3BP5, SPRY2, PKIG, SPRED2, SPRED3, SPRED1, DUSP9, PKIA, GADD45A, LATS2, SPRY4, THY1	1363	51	14219	2.45462	1	0.129839	13.4141
GOTERM_BP_ALL	GO:0032501~multicellular organismal process	455	23.5264	0.00787048	DLC1, PTGS2, PGF, L1CAM, REST, CITED2, SYP, SERPINE2, CUL7, GRIN2D, CUL1, RAB27A, INA, PHOX2A, ICOSL, ARC, PTPRF, GATM, TMIE, KIF5C, RXRG, F8, MYH6, MECOM, CTNNA1, BCL2L11, THY1, PLAUR, RPS19, TAGLN, F5, JUN, MAPK3, ABAT, HSD11B2, ADAMTS1, ERBB3, PTH1R, CACNB2, HSPA1A, HSPA1B, PFN1, PROCR, PVRL1, ARG2, DNMT3L, PVRL2, DNMT3B, LFNG, UNC45B, ODC1, DNMT3A, ACACA, CLGN, RGS2, PENK, PKP2, BMP8B, BMP8A,…	1363	4329	14219	1.09647	1	0.12934	13.4273
GOTERM_BP_ALL	GO:0048568~embryonic organ development	36	1.86143	0.00831685	FGFR2, EDN1, EGLN1, PRRX2, GLI3, ADA, CITED2, GLI1, SPRY2, CHD7, CHRNA9, GBX2, PLCD1, COL11A1, MYC, CYR61, OTOP1, CEBPA, BMP4, EGFR, MDFI, RARG, TMIE, OTX2, HSPG2, FZD3, JUNB, EPHA2, FZD6, WNT7B, GCM1, LRP6, NEUROD1, PBX1, ZFPM2, WNT9A	1363	241	14219	1.55833	1	0.135529	14.1353
GOTERM_BP_ALL	GO:0007389~pattern specification process	41	2.11996	0.00843565	FGFR2, SHROOM3, EDN1, PAX6, BMPR2, ZEB2, DNAHC11, GLI3, SRF, ZIC3, SUFU, CITED2, GLI1, GBX2, FRAT1, NKX3-1, HHIP, PLXND1, LFNG, BMP4, MDFI, TRP53, ARC, C2CD3, EGR2, RARG, FOXJ1, OTX2, DLL3, EN1, CELSR2, SMO, ACVR2B, SFRP2, HIPK2, LRP6, GDF11, NEUROD1, PBX1, WNT7A, TCF15	1363	284	14219	1.50605	1	0.136679	14.3228
GOTERM_BP_ALL	GO:0030799~regulation of cyclic nucleotide metabolic process	15	0.775595	0.00867106	CALCR, GUCA1A, ADCY1, ADCY2, ADORA2B, PTGER4, ADCY7, PTH1R, ADCY6, EDN1, TIMP2, FLNA, CHRM4, GPR44, GRM6	1363	73	14219	2.14359	1	0.139565	14.6932
GOTERM_BP_ALL	GO:0019935~cyclic-nucleotide-mediated signaling	14	0.723888	0.00895342	GNAT1, CALCR, ADCY2, PTGER4, ADORA2B, PTH1R, RIMS2, FLNA, GNAT2, CHRM4, EIF4EBP2, GPR44, GRM6, RAPGEF4	1363	66	14219	2.21288	1	0.14311	15.1355
GOTERM_BP_ALL	GO:0009123~nucleoside monophosphate metabolic process	13	0.672182	0.00912368	ADCY1, ADCY2, ADCY7, ATIC, ADCY6, PDE5A, PDE4D, CNP, GUCY1B3, BC048355, IMPDH1, PRPS2, ADA	1363	59	14219	2.29861	1	0.144955	15.4012
GOTERM_BP_ALL	GO:0042063~gliogenesis	12	0.620476	0.00913033	GM98, FGF5, METRN, EGR2, GCM1, ERBB3, PHGDH, PAX6, POU3F1, MMP14, NRG1, GAP43	1363	52	14219	2.40742	1	0.14438	15.4115
GOTERM_BP_ALL	GO:0009582~detection of abiotic stimulus	12	0.620476	0.00913033	GNAT1, TUB, GUCA1A, CHRNA9, ARRB1, GRIN2D, NR2F6, NGFR, MYC, GPR98, OTOP1, GNAT2	1363	52	14219	2.40742	1	0.14438	15.4115
GOTERM_BP_ALL	GO:0006464~protein modification process	146	7.54912	0.0094397	GNA14, EIF5A, C230081A13RIK, TGFB1, ST3GAL5, B3GALNT1, MLKL, EGFR, RET, PTPRF, SKP2, RPS6KC1, PTPRU, PTPRN, STK4, CDKL2, CDKL5, PLCE1, CDKL1, ASPHD2, TRIM32, MAPK3, BMP2K, ROR1, NEK4, LRRK1, USP17L5, LOC100045551, FGFR2, FGFR3, ERBB3, STK10, SSH2, BMPR2, ST8SIA1, UBA6, UBE2V1, ST8SIA3, MAPKAPK2, CD74, EPHB2, CAMKV, 2610018G03RIK, SPNB2, B3GNT7, TEK, TEC, MDFI, ST6GAL1, PTPN9, EHMT1, SMAD7, PTPN4,…	1363	1260	14219	1.2088	1	0.148223	15.8922
GOTERM_BP_ALL	GO:0044057~regulation of system process	31	1.6029	0.0095523	GM98, ADORA2B, CALD1, EDN1, BMPR2, NCS1, GJA1, TPM1, ADA, EPHB2, SYP, ANXA6, BDNF, SLC1A3, GRIN2D, DLG4, CHRNA7, CAMK2A, LTB, KLK8, EGR2, SMAD7, STXBP1, PARK2, MYH6, TBXA2R, CACNA1G, HBEGF, PBX3, F2R, CACNA1B	1363	201	14219	1.60894	1	0.149173	16.0664
GOTERM_BP_ALL	GO:0051101~regulation of DNA binding	15	0.775595	0.00977783	MDFI, SMO, HMGB2, MTDH, ZFP462, FOXJ1, HMOX1, HIPK2, CREBBP, MAPK3, TLR2, TLR3, TGFB1, FLNA, JMY	1363	74	14219	2.11462	1	0.151733	16.4145
GOTERM_BP_ALL	GO:0007611~learning or memory	17	0.879007	0.00984112	FZD9, KLK8, ADCY1, EGR2, GABRA5, ATP1A3, ABI2, ITGA3, PARK2, EPHB2, ACCN2, BDNF, ITGA5, LAMB1-1, TMOD2, PTN, CHRNA7	1363	89	14219	1.99265	1	0.151949	16.5119
GOTERM_BP_ALL	GO:0030814~regulation of cAMP metabolic process	14	0.723888	0.0101616	CALCR, ADCY1, ADCY2, CHRM4, ADORA2B, ADCY7, PTGER4, GPR44, GRM6, EDN1, ADCY6, PTH1R, TIMP2, FLNA	1363	67	14219	2.17985	1	0.155808	17.0036
GOTERM_BP_ALL	GO:0030902~hindbrain development	14	0.723888	0.0101616	PHOX2A, DLC1, EGR2, CYP11A1, EN1, LMX1A, GLI1, SMO, BCL2, GBX2, GNPAT, NEUROD1, WNT7A, MYH10	1363	67	14219	2.17985	1	0.155808	17.0036
GOTERM_BP_ALL	GO:0022604~regulation of cell morphogenesis	18	0.930714	0.0102327	KLK8, SHROOM3, PLXNB1, GNA12, EPHB2, THY1, METRN, CORO1A, YWHAH, TIAM1, ITGA7, GRLF1, SPNA1, MYH14, ARAP3, AKAP2, WNT7A, MYH10	1363	97	14219	1.93586	1	0.156111	17.1124
GOTERM_BP_ALL	GO:0032844~regulation of homeostatic process	13	0.672182	0.0104375	CALCR, GM98, TAL1, KLK8, SMAD7, ETS1, BCL2, LCK, CACNA1G, ADA, TGFB1, F2R, THY1	1363	60	14219	2.2603	1	0.158281	17.4248
GOTERM_BP_ALL	GO:0051348~negative regulation of transferase activity	12	0.620476	0.0105507	SH3BP5, SPRY2, PKIG, SPRED2, SPRED3, SPRED1, DUSP9, PKIA, GADD45A, LATS2, SPRY4, THY1	1363	53	14219	2.36199	1	0.159154	17.597
GOTERM_BP_ALL	GO:0030278~regulation of ossification	12	0.620476	0.0105507	BMP4, CALCR, WNT7B, EGR2, PTGER4, BCL2, CD276, BMP2K, PBX1, TWIST2, TGFB1, TOB2	1363	53	14219	2.36199	1	0.159154	17.597
GOTERM_BP_ALL	GO:0014033~neural crest cell differentiation	9	0.465357	0.0109393	NRP2, SMO, RET, FGF15, EDN1, CFL1, GBX2, SEMA3C, ZEB2	1363	33	14219	2.84513	1	0.163811	18.1855
GOTERM_BP_ALL	GO:0014032~neural crest cell development	9	0.465357	0.0109393	NRP2, SMO, RET, FGF15, EDN1, CFL1, GBX2, SEMA3C, ZEB2	1363	33	14219	2.84513	1	0.163811	18.1855
GOTERM_BP_ALL	GO:0006140~regulation of nucleotide metabolic process	15	0.775595	0.0109925	CALCR, GUCA1A, ADCY1, ADCY2, ADORA2B, PTGER4, ADCY7, PTH1R, ADCY6, EDN1, TIMP2, FLNA, CHRM4, GPR44, GRM6	1363	75	14219	2.08643	1	0.163825	18.2658
GOTERM_BP_ALL	GO:0001503~ossification	19	0.98242	0.0115681	FGFR2, BMP4, FGF18, BMP1, PDLIM7, PTGS2, PTH1R, HSPG2, MMP14, MMP2, SMO, TNFSF11, BCL2, PTN, SORT1, RPS27A, BMP8B, BMP6, BMP8A	1363	106	14219	1.86991	1	0.170924	19.1295
GOTERM_BP_ALL	GO:0007229~integrin-mediated signaling pathway	15	0.775595	0.0123219	VAV3, ADAMTS19, ADAMTS14, BCAR1, ITGA3, ITGB3, ITGB1, ITGA9, ITGA6, ITGA5, ITGB8, ITGA7, GRLF1, ADAM8, CIB2	1363	76	14219	2.05897	1	0.180275	20.2475
GOTERM_BP_ALL	GO:0030001~metal ion transport	58	2.99897	0.0123513	STEAP3, SLC5A5, SLC9A7, TRPV2, KCNJ10, KCNIP3, SLC23A1, KCNK6, SLC24A1, CHRNA7, KCNG3, SLC4A4, KCNG1, NIPAL4, KCND1, ATP4A, CACNG7, STIM2, KCTD21, CACNG4, PRKCB, LCK, KCNH6, KCTD12B, SLC40A1, STEAP1, KCNMB4, SLC39A14, SLC38A3, SLC38A2, CYSLTR1, SLC39A10, CACNB2, KCNJ3, ANXA6, SLC5A4B, SLC39A8, SCN9A, CAMK2A, TRPC1, SLC8A2, SLC12A4, ATP1A3, KCNK1, CACNA1S, KCNK2, SLC10A1, ACCN2, KCTD8, SLC17A7, KC…	1363	442	14219	1.36892	1	0.179896	20.2908
GOTERM_BP_ALL	GO:0016310~phosphorylation	88	4.55016	0.0123982	NUAK2, NUAK1, CCNT1, CAD, C230081A13RIK, TGFB1, LATS2, D8ERTD82E, PAK6, CCNE1, PAK3, CDK12, TGFA, MLKL, CDK14, EGFR, RET, SGK2, MTAP2, PRKCH, RPS6KC1, CDK6, PKDCC, PRKCE, CDKL2, DAPK3, STK4, CDKL5, DAPK1, PRKCB, HUNK, DDR1, PLCE1, STYK1, ACVR2B, CDKL1, MAPK3, LCK, HIPK2, CFL1, ROR1, BMP2K, NRK, NEK4, MAP3K14, LRRK1, FGFR2, FGFR3, ERBB3, STK10, BMPR2, ABI2, BRSK1, MAPKAPK2, CD74, TRIB1, EPHB2, CAM…	1363	718	14219	1.27859	1	0.17975	20.3598
GOTERM_BP_ALL	GO:0035108~limb morphogenesis	20	1.03413	0.0128304	FGFR2, BMP4, RARG, C2CD3, TBX4, GNA12, CRABP2, EN1, PRRX2, MECOM, GLI3, MSX2, SALL4, CHD7, ZFP697, LRP6, PBX1, WNT9A, WNT7A, TWIST1	1363	115	14219	1.81428	1	0.184653	20.9935
GOTERM_BP_ALL	GO:0035107~appendage morphogenesis	20	1.03413	0.0128304	FGFR2, BMP4, RARG, C2CD3, TBX4, GNA12, CRABP2, EN1, PRRX2, MECOM, GLI3, MSX2, SALL4, CHD7, ZFP697, LRP6, PBX1, WNT9A, WNT7A, TWIST1	1363	115	14219	1.81428	1	0.184653	20.9935
GOTERM_BP_ALL	GO:0003002~regionalization	32	1.6546	0.0128968	EDN1, BMPR2, PAX6, ZEB2, GLI3, ZIC3, SUFU, GLI1, GBX2, NKX3-1, HHIP, LFNG, BMP4, TRP53, MDFI, ARC, EGR2, RARG, OTX2, DLL3, EN1, CELSR2, SMO, ACVR2B, SFRP2, HIPK2, LRP6, GDF11, NEUROD1, PBX1, WNT7A, TCF15	1363	214	14219	1.55995	1	0.184741	21.0904
GOTERM_BP_ALL	GO:0031279~regulation of cyclase activity	13	0.672182	0.013499	CALCR, GUCA1A, ADCY1, ADCY2, PTGER4, ADCY7, ADORA2B, PTH1R, ADCY6, FLNA, CHRM4, GPR44, GRM6	1363	62	14219	2.18738	1	0.191733	21.9643
GOTERM_BP_ALL	GO:0051339~regulation of lyase activity	13	0.672182	0.013499	CALCR, GUCA1A, ADCY1, ADCY2, PTGER4, ADCY7, ADORA2B, PTH1R, ADCY6, FLNA, CHRM4, GPR44, GRM6	1363	62	14219	2.18738	1	0.191733	21.9643
GOTERM_BP_ALL	GO:0051960~regulation of nervous system development	24	1.24095	0.0136466	TRP53, GM98, KLK8, PLXNB1, BEX1, PAX6, LMX1A, REST, TIMP2, CTNNA1, TGFB1, EPHB2, THY1, GLI1, NOTCH3, SMO, BDNF, METRN, YWHAH, TIAM1, BCL2, PBX1, RHOC, WNT7A	1363	148	14219	1.6917	1	0.192824	22.177
GOTERM_BP_ALL	GO:0048589~developmental growth	18	0.930714	0.0137273	BMP4, FGFR2, GATM, PTGS2, UBE3A, GJA1, PTEN, GLI3, TIMP3, TGFB1, PLAUR, SMO, BCL2, ZMIZ1, POU4F2, HBEGF, GAP43, DCLK1	1363	100	14219	1.87778	1	0.193055	22.293
GOTERM_BP_ALL	GO:0022037~metencephalon development	10	0.517063	0.0138561	PHOX2A, SMO, CYP11A1, BCL2, GBX2, GNPAT, LMX1A, WNT7A, MYH10, GLI1	1363	41	14219	2.54442	1	0.193893	22.4781
GOTERM_BP_ALL	GO:0050767~regulation of neurogenesis	22	1.13754	0.0139467	TRP53, KLK8, PLXNB1, PAX6, BEX1, LMX1A, REST, TIMP2, CTNNA1, TGFB1, EPHB2, THY1, NOTCH3, SMO, BDNF, METRN, YWHAH, TIAM1, BCL2, PBX1, RHOC, WNT7A	1363	132	14219	1.73869	1	0.194242	22.6079
GOTERM_BP_ALL	GO:0048013~ephrin receptor signaling pathway	4	0.206825	0.0140499	EFNB3, TIAM1, EPHA2, EPHB2	1363	6	14219	6.95476	1	0.194745	22.7556
GOTERM_BP_ALL	GO:0048593~camera-type eye morphogenesis	11	0.568769	0.0140521	BMP4, BHLHE22, PVRL1, GDF11, POU2F1, LRP6, GLI3, COL8A2, EPHB2, THY1, GNAT2	1363	48	14219	2.3907	1	0.193986	22.7587
GOTERM_BP_ALL	GO:0010001~glial cell differentiation	11	0.568769	0.0140521	GM98, FGF5, METRN, EGR2, GCM1, ERBB3, PHGDH, PAX6, POU3F1, NRG1, GAP43	1363	48	14219	2.3907	1	0.193986	22.7587
GOTERM_BP_ALL	GO:0030802~regulation of cyclic nucleotide biosynthetic process	14	0.723888	0.0145574	CALCR, GUCA1A, ADCY1, ADCY2, ADORA2B, PTGER4, ADCY7, PTH1R, ADCY6, EDN1, FLNA, CHRM4, GPR44, GRM6	1363	70	14219	2.08643	1	0.199457	23.4779
GOTERM_BP_ALL	GO:0030808~regulation of nucleotide biosynthetic process	14	0.723888	0.0145574	CALCR, GUCA1A, ADCY1, ADCY2, ADORA2B, PTGER4, ADCY7, PTH1R, ADCY6, EDN1, FLNA, CHRM4, GPR44, GRM6	1363	70	14219	2.08643	1	0.199457	23.4779
GOTERM_BP_ALL	GO:0043062~extracellular structure organization	24	1.24095	0.0147227	COL18A1, KLK8, LGALS3, NRXN2, ADAMTS14, SPOCK2, NFASC, HSPG2, COL5A3, CACNA1S, COL5A2, COL5A1, ANXA2, WNT7B, DLG4, GNPAT, LAMC1, NRG1, VWA1, WNT7A, COL11A1, GFOD2, CYR61, F2R	1363	149	14219	1.68034	1	0.200688	23.7117
GOTERM_BP_ALL	GO:0008589~regulation of smoothened signaling pathway	7	0.361944	0.0148774	FGFR2, C2CD3, HHIP, PRRX2, WNT9A, CTNNA1, SUFU	1363	22	14219	3.31932	1	0.201779	23.93
GOTERM_BP_ALL	GO:0035115~embryonic forelimb morphogenesis	7	0.361944	0.0148774	CRABP2, LRP6, EN1, WNT9A, MECOM, WNT7A, TWIST1	1363	22	14219	3.31932	1	0.201779	23.93
GOTERM_BP_ALL	GO:0016311~dephosphorylation	23	1.18925	0.0149429	LOC100045551, PTPN9, PTPRF, PTPRZ1, SSH2, PTPN4, PTPN14, PTPN13, PTPRU, PTPRN, PTEN, DUSP5, PPM1G, DUSP3, DUSP2, DUSP26, DUSP27, BCL2, SYNJ2, PTPN1, DUSP9, DUSP8, DUSP6	1363	141	14219	1.7017	1	0.201779	24.0224
GOTERM_BP_ALL	GO:0046822~regulation of nucleocytoplasmic transport	9	0.465357	0.0156336	KHDRBS1, SMO, PKIG, TRIP6, PKIA, GLI3, TGFB1, SUFU, FLNA	1363	35	14219	2.68255	1	0.209295	24.9886
GOTERM_BP_ALL	GO:0043242~negative regulation of protein complex disassembly	9	0.465357	0.0156336	MTAP2, SPNB2, MTAP1A, SPNB1, SCIN, CAPG, MTAP1B, SPNA1, MID1	1363	35	14219	2.68255	1	0.209295	24.9886
GOTERM_BP_ALL	GO:0019226~transmission of nerve impulse	33	1.70631	0.015934	SYT1, KCNMB4, GM98, CPLX1, SYT4, CACNB2, TGFB1, SYP, SYN1, GRIN2D, APBA2, GNPAT, CHRNA7, SV2A, POU3F1, NRG1, KLK8, EGR2, SLC25A4, NRXN2, UGT8A, STXBP1, CACNG4, PARK2, GRIA4, STX1B, SLC17A7, GRM6, TMOD2, ABAT, NCAN, WNT7A, CACNA1B	1363	226	14219	1.52328	1	0.212055	25.4051
GOTERM_BP_ALL	GO:0006810~transport	254	13.1334	0.0160189	S100A4, SYT1, SLC9A7, SYT4, SYT5, SYT3, EDN1, AQP5, SYP, ATCAY, BDNF, CHRNA9, KCNK6, LCAT, GRIN2D, RAB25, RAPGEF4, CHRNA7, NUP35, RAB27A, PLD2, ARC, SRP54A, 2010107G12RIK, MYH6, PITPNM1, RPS19, TIMM8A1, ABCB1B, RAB15, RAB13, BIN1, KCNMB4, 1700034H14RIK, RBP7, RBP1, TMX4, CACNB2, RIMS2, KCNJ3, CD74, RIMS4, RIMS3, SPNB2, NUP50, STX11, TRPC1, OSBPL5, RASEF, KCNK1, KCNK2, ABCG2, ARF3, APOL8, SLC36A4,…	1363	2342	14219	1.13141	1	0.21224	25.5225
GOTERM_BP_ALL	GO:0006790~sulfur metabolic process	17	0.879007	0.0163057	OCLN, SPOCK2, GSTT1, CHST5, MTHFD1, SULT4A1, BGN, GSTK1, CHST12, SULF1, GPX3, PHGDH, SEPP1, EXT1, PAPSS2, MGST1, GHR	1363	94	14219	1.88666	1	0.214797	25.9177
GOTERM_BP_ALL	GO:0045664~regulation of neuron differentiation	18	0.930714	0.016533	KLK8, PLXNB1, PAX6, BEX1, LMX1A, REST, TIMP2, EPHB2, THY1, NOTCH3, METRN, BDNF, YWHAH, TIAM1, BCL2, PBX1, RHOC, WNT7A	1363	102	14219	1.84096	1	0.21663	26.2294
GOTERM_BP_ALL	GO:0043412~biopolymer modification	150	7.75595	0.0166554	GNA14, EIF5A, C230081A13RIK, TGFB1, ST3GAL5, B3GALNT1, MLKL, EGFR, RET, PTPRF, SKP2, RPS6KC1, PTPRU, PTPRN, STK4, CDKL2, CDKL5, PLCE1, CDKL1, ASPHD2, TRIM32, MAPK3, BMP2K, ROR1, NEK4, LRRK1, USP17L5, LOC100045551, FGFR2, FGFR3, ERBB3, STK10, SSH2, BMPR2, ST8SIA1, UBE2V1, UBA6, ST8SIA3, MAPKAPK2, CD74, EPHB2, CAMKV, 2610018G03RIK, SPNB2, B3GNT7, TEK, DNMT3B, TDRD1, TEC, MDFI, DNMT3A, ST6GAL1, PTPN…	1363	1320	14219	1.18547	1	0.217227	26.3968
GOTERM_BP_ALL	GO:0060284~regulation of cell development	25	1.29266	0.0167145	TRP53, BMP4, KLK8, PLXNB1, BEX1, PAX6, LMX1A, REST, TIMP2, CTNNA1, TGFB1, EPHB2, THY1, NOTCH3, SMO, BDNF, METRN, YWHAH, TIAM1, BCL2, PBX1, RHOC, MBNL3, HDAC9, WNT7A	1363	159	14219	1.64027	1	0.217087	26.4774
GOTERM_BP_ALL	GO:0007420~brain development	40	2.06825	0.0169003	DLC1, FGFR2, CDK5R1, FGFR3, SOX3, PAX6, ZEB2, GLI3, GLI1, TPM3, SLC23A1, BCL2, GBX2, GNPAT, LHX6, SEPP1, DCLK1, PHOX2A, BMP4, EGFR, IRS2, EGR2, C2CD3, CYP11A1, OTX2, HSPG2, EN1, LMX1A, MECOM, NOTCH3, SMO, BBS2, GRLF1, NEUROD1, EPOR, RBPJ, SMARCA1, LRP2, WNT7A, MYH10	1363	288	14219	1.44891	1	0.218407	26.7306
GOTERM_BP_ALL	GO:0007517~muscle organ development	27	1.39607	0.0170309	CAV2, FOXK1, PDLIM3, EGLN1, ITGB1, TPM1, PTEN, TGFB1, MYL6B, ETV1, MKX, NRG1, COL11A1, JPH1, UNC45B, HIST1H1B, SMAD7, HSPG2, RXRG, MYH6, CACNA1S, FLNB, TAGLN, ZFPM2, TCF15, F2R, MYH10	1363	176	14219	1.60038	1	0.219082	26.908
GOTERM_BP_ALL	GO:0040007~growth	29	1.49948	0.0171397	FGFR2, PTGS2, UBE3A, GJA1, GLI3, TIMP3, PTEN, TGFB1, BCL2, ANKRD11, APBA2, POU4F2, ETNK2, SEPP1, DCLK1, TRP53, BMP4, GATM, PLAUR, SMO, ACVR2B, ZMIZ1, GDF11, HBEGF, EMP3, GAP43, BMP8B, BMP6, BMP8A	1363	193	14219	1.56752	1	0.219502	27.0555
GOTERM_BP_ALL	GO:0009953~dorsal/ventral pattern formation	13	0.672182	0.0172015	MDFI, BMP4, EDN1, OTX2, PAX6, EN1, GLI3, SUFU, GLI1, SMO, LRP6, HHIP, WNT7A	1363	64	14219	2.11903	1	0.219387	27.1391
GOTERM_BP_ALL	GO:0051056~regulation of small GTPase mediated signal transduction	33	1.70631	0.0179186	FGD2, PREX2, RASGEF1B, AKAP13, RGL1, SPRY2, PLEKHG2, DOCK2, RASGRP3, TIAM1, RASGRP2, SH3D20, RAPGEF5, RAPGEF4, D10BWG1379E, FGD5, NRG1, E130112L23RIK, VAV3, FOXJ1, ARHGEF5, PSD3, TRIO, ARHGEF17, ARHGEF9, DGKI, RGNEF, ARHGEF10, USP6NL, PLCE1, PSD, ARAP3, SPATA13	1363	228	14219	1.50991	1	0.226639	28.1031
GOTERM_BP_ALL	GO:0048736~appendage development	20	1.03413	0.0180645	FGFR2, BMP4, RARG, C2CD3, TBX4, GNA12, CRABP2, EN1, PRRX2, MECOM, GLI3, MSX2, SALL4, CHD7, ZFP697, LRP6, PBX1, WNT9A, WNT7A, TWIST1	1363	119	14219	1.7533	1	0.227434	28.2978
GOTERM_BP_ALL	GO:0060173~limb development	20	1.03413	0.0180645	FGFR2, BMP4, RARG, C2CD3, TBX4, GNA12, CRABP2, EN1, PRRX2, MECOM, GLI3, MSX2, SALL4, CHD7, ZFP697, LRP6, PBX1, WNT9A, WNT7A, TWIST1	1363	119	14219	1.7533	1	0.227434	28.2978
GOTERM_BP_ALL	GO:0031099~regeneration	7	0.361944	0.0185359	GATM, ATIC, BCL2, GJA1, TIMP3, GAP43, PLAUR	1363	23	14219	3.175	1	0.23182	28.9233
GOTERM_BP_ALL	GO:0042325~regulation of phosphorylation	40	2.06825	0.0187232	FGFR3, EDN1, BMPR2, ZEB2, SFN, CD74, SPRY4, LATS2, TRIB1, SPRY2, BCL2, SPRED2, SPRED3, TGFA, RAPGEF4, SPRED1, PPP1R14C, NRG1, PPP1R14B, GHR, BMP4, MDFI, EGFR, VAV3, PKIG, SOCS1, DGKK, PRKCE, PKIA, CISH, THY1, CDKN1C, SH3BP5, ACVR2B, PLCE1, JUN, NRK, DUSP9, GADD45A, F2R	1363	290	14219	1.43892	1	0.233036	29.1704
GOTERM_BP_ALL	GO:0001570~vasculogenesis	10	0.517063	0.0187731	SMO, LOC100048295, CUL7, ZMIZ1, ZFPM2, SOX18, EPHA2, JUNB, KDR, CITED2	1363	43	14219	2.42608	1	0.23274	29.2361
GOTERM_BP_ALL	GO:0015674~di-, tri-valent inorganic cation transport	25	1.29266	0.0192328	STEAP3, SLC39A14, CYSLTR1, TRPV2, CACNB2, ANXA6, SLC24A1, CHRNA7, CAMK2A, NIPAL4, TRPC1, SLC8A2, CACNG7, STIM2, CACNG4, CACNA1S, PRKCB, ACCN2, CORO1A, LCK, CACNA1G, STEAP1, SLC40A1, F2R, CACNA1B	1363	161	14219	1.6199	1	0.236898	29.8386
GOTERM_BP_ALL	GO:0030817~regulation of cAMP biosynthetic process	13	0.672182	0.0193164	CALCR, ADCY1, ADCY2, PTGER4, ADCY7, ADORA2B, PTH1R, ADCY6, EDN1, FLNA, CHRM4, GPR44, GRM6	1363	65	14219	2.08643	1	0.236954	29.9477
GOTERM_BP_ALL	GO:0048839~inner ear development	16	0.827301	0.0193905	FGFR2, FGFR3, TMIE, OTX2, JAG2, FZD3, PRRX2, GPR98, FZD6, SPRY2, BDNF, CHD7, CHRNA9, GBX2, COL11A1, OTOP1	1363	88	14219	1.89675	1	0.236908	30.0442
GOTERM_BP_ALL	GO:0042493~response to drug	16	0.827301	0.0193905	S100A4, TRP53, ATP4A, TLR2, ATP1A3, CFTR, SLC47A1, TGFB1, BDNF, SLC1A3, ABCB1B, BCL2, JUN, LCK, SLC18A1, GRK5	1363	88	14219	1.89675	1	0.236908	30.0442
GOTERM_BP_ALL	GO:0042060~wound healing	19	0.98242	0.019736	KLF6, JUB, GATM, F8, GJA1, CX3CL1, TIMP3, TGFB1, PLAUR, DYSF, F5, PROCR, GP1BB, HBEGF, PAPSS2, GAP43, F2R, RAB27A, MYH10	1363	112	14219	1.76974	1	0.239762	30.4926
GOTERM_BP_ALL	GO:0050790~regulation of catalytic activity	59	3.05067	0.0199981	JUB, ADCY1, ADCY2, ADCY7, ADCY6, EDN1, ZEB2, LATS2, SPRY4, SPRY2, ARHGAP6, GPR44, SH3D20, SPRED2, SPRED3, TGFA, SPRED1, NRG1, MYC, DHCR24, PTGER4, FOXJ1, PKIG, MYH6, PKIA, FLNA, THY1, ACVR2B, PLCE1, CHRM4, LCK, GRM6, NRK, GADD45A, CALCR, ADORA2B, PTH1R, HSPA1A, SFN, HSPA1B, CD74, TRIB1, RASGRP3, ARG2, BCL2, MDFI, TRP53, CFLAR, GUCA1A, VAV3, DGKK, DGKI, CISH, USP6NL, SH3BP5, VCP, BBC3, ARAP3, DUSP…	1363	462	14219	1.33224	1	0.241701	30.831
GOTERM_BP_ALL	GO:0001656~metanephros development	12	0.620476	0.0203264	BMP4, FGFR2, RET, BDNF, WNT4, LOC100048295, PGF, BCL2, PAX8, GDF11, PBX1, GLI3	1363	58	14219	2.15837	1	0.244316	31.2526
GOTERM_BP_ALL	GO:0033157~regulation of intracellular protein transport	8	0.41365	0.0207601	SMO, PKIG, TRIP6, PKIA, GLI3, TGFB1, SUFU, FLNA	1363	30	14219	2.7819	1	0.248003	31.8058
GOTERM_BP_ALL	GO:0006816~calcium ion transport	20	1.03413	0.0212371	TRPC1, SLC8A2, CYSLTR1, CACNG7, TRPV2, STIM2, CACNG4, CACNB2, CACNA1S, PRKCB, ACCN2, ANXA6, CORO1A, LCK, SLC24A1, CACNA1G, CHRNA7, CAMK2A, F2R, CACNA1B	1363	121	14219	1.72432	1	0.252093	32.4094
GOTERM_BP_ALL	GO:0010324~membrane invagination	28	1.44778	0.0213993	STON2, CAV2, STON1, GULP1, UBE3A, SYP, AP1S3, PACSIN1, SH3D20, DLG4, CHRNA7, EHD1, EHD2, GHR, MRC1, PLD2, ARC, HCK, MRC2, STXBP1, IRF8, SH3KBP1, LRP6, RIN2, SORT1, LRP2, BIN1, CLCN5	1363	188	14219	1.55372	1	0.252898	32.6136
GOTERM_BP_ALL	GO:0006897~endocytosis	28	1.44778	0.0213993	STON2, CAV2, STON1, GULP1, UBE3A, SYP, AP1S3, PACSIN1, SH3D20, DLG4, CHRNA7, EHD1, EHD2, GHR, MRC1, PLD2, ARC, HCK, MRC2, STXBP1, IRF8, SH3KBP1, LRP6, RIN2, SORT1, LRP2, BIN1, CLCN5	1363	188	14219	1.55372	1	0.252898	32.6136
GOTERM_BP_ALL	GO:0040017~positive regulation of locomotion	10	0.517063	0.0216567	COL18A1, PRR5, CORO1A, IRS2, BCL2, BCAR1, LAMB1-1, TLR2, HBEGF, ARHGAP8, TRIP6	1363	44	14219	2.37094	1	0.254669	32.9362
GOTERM_BP_ALL	GO:0051234~establishment of localization	254	13.1334	0.0218665	S100A4, SYT1, SLC9A7, SYT4, SYT5, SYT3, EDN1, AQP5, SYP, ATCAY, BDNF, CHRNA9, KCNK6, LCAT, GRIN2D, RAB25, RAPGEF4, CHRNA7, NUP35, RAB27A, PLD2, ARC, SRP54A, 2010107G12RIK, MYH6, PITPNM1, RPS19, TIMM8A1, ABCB1B, RAB15, RAB13, BIN1, KCNMB4, 1700034H14RIK, RBP7, RBP1, TMX4, CACNB2, RIMS2, KCNJ3, CD74, RIMS4, RIMS3, SPNB2, NUP50, STX11, TRPC1, OSBPL5, RASEF, KCNK1, KCNK2, ABCG2, ARF3, APOL8, SLC36A4,…	1363	2358	14219	1.12373	1	0.25594	33.1982
GOTERM_BP_ALL	GO:0042246~tissue regeneration	5	0.258532	0.0221519	GATM, GJA1, TIMP3, GAP43, PLAUR	1363	12	14219	4.34672	1	0.257962	33.5529
GOTERM_BP_ALL	GO:0007548~sex differentiation	21	1.08583	0.0226012	HMGB2, UBE3A, DMRT1, VGF, MMP14, TGFB1, BCL2L11, KDR, WNT4, LOC100048295, CHD7, STRA8, BCL2, PHB2, NKX3-1, PBX1, ADAMTS1, BIK, SRD5A1, LFNG, DHCR24	1363	130	14219	1.68519	1	0.261609	34.1078
GOTERM_BP_ALL	GO:0021675~nerve development	7	0.361944	0.0227642	BDNF, EGR2, SLC1A3, ERBB3, NGFR, GLI3, EPHB2	1363	24	14219	3.04271	1	0.262362	34.3081
GOTERM_BP_ALL	GO:0010647~positive regulation of cell communication	28	1.44778	0.0227685	FGFR2, FGF18, FGFR3, UBE3A, NCS1, SOX4, TLR3, ZEB2, L1CAM, PRRX2, ADA, CITED2, DOCK2, ECE1, SLC1A3, GPR44, TGFA, NRG1, LTB, PDCD11, SKP2, DGKI, CTNNA1, FLNA, TNFSF11, HIPK2, TMOD2, WNT9A	1363	189	14219	1.5455	1	0.26153	34.3133
GOTERM_BP_ALL	GO:0009967~positive regulation of signal transduction	26	1.34436	0.0228407	FGFR2, FGF18, FGFR3, UBE3A, SOX4, TLR3, L1CAM, ZEB2, PRRX2, ADA, CITED2, DOCK2, ECE1, GPR44, TGFA, NRG1, LTB, PDCD11, SKP2, DGKI, CTNNA1, FLNA, TNFSF11, HIPK2, TMOD2, WNT9A	1363	172	14219	1.57695	1	0.261378	34.4018
GOTERM_BP_ALL	GO:0045987~positive regulation of smooth muscle contraction	4	0.206825	0.0228518	EDN1, TBXA2R, ADA, F2R	1363	7	14219	5.96122	1	0.260624	34.4155
GOTERM_BP_ALL	GO:0051098~regulation of binding	16	0.827301	0.0234042	MDFI, SMO, HMGB2, MTDH, ZFP462, FOXJ1, HMOX1, HIPK2, CREBBP, MAPK3, TLR2, TLR3, MYC, TGFB1, FLNA, JMY	1363	90	14219	1.8546	1	0.265191	35.0887
GOTERM_BP_ALL	GO:0046578~regulation of Ras protein signal transduction	27	1.39607	0.0235608	FGD2, PREX2, AKAP13, SPRY2, DOCK2, PLEKHG2, TIAM1, SH3D20, D10BWG1379E, NRG1, FGD5, E130112L23RIK, VAV3, FOXJ1, ARHGEF5, PSD3, TRIO, ARHGEF17, DGKI, ARHGEF9, RGNEF, ARHGEF10, USP6NL, PLCE1, PSD, ARAP3, SPATA13	1363	181	14219	1.55617	1	0.265851	35.2784
GOTERM_BP_ALL	GO:0009581~detection of external stimulus	12	0.620476	0.02569	GNAT1, TUB, GUCA1A, CHRNA9, ARRB1, GRIN2D, NR2F6, NGFR, MYC, GPR98, OTOP1, GNAT2	1363	60	14219	2.08643	1	0.285413	37.8058
GOTERM_BP_ALL	GO:0045761~regulation of adenylate cyclase activity	12	0.620476	0.02569	CALCR, ADCY1, ADCY2, CHRM4, ADORA2B, ADCY7, PTGER4, GPR44, GRM6, ADCY6, PTH1R, FLNA	1363	60	14219	2.08643	1	0.285413	37.8058
GOTERM_BP_ALL	GO:0044093~positive regulation of molecular function	41	2.11996	0.0264833	CALCR, HMGB2, ADCY1, MTDH, ADCY2, ADORA2B, ADCY7, ADCY6, EDN1, PTH1R, TLR2, TLR3, ZEB2, CD74, TGFB1, ARHGAP6, BCL2, SH3D20, TGFA, NRG1, MYC, MDFI, TRP53, VAV3, PTGER4, FOXJ1, CREBBP, STIM2, DGKK, CISH, JMY, THY1, ACVR2B, PLCE1, VCP, BBC3, PLCG2, HIPK2, LCK, NRK, F2R	1363	306	14219	1.39777	1	0.291956	38.7234
GOTERM_BP_ALL	GO:0042471~ear morphogenesis	14	0.723888	0.0275322	FGFR2, TMIE, OTX2, EDN1, FZD3, PRRX2, FZD6, SPRY2, CHD7, CHRNA9, GBX2, MYC, COL11A1, OTOP1	1363	76	14219	1.92171	1	0.300756	39.917
GOTERM_BP_ALL	GO:0030837~negative regulation of actin filament polymerization	7	0.361944	0.027595	PFN1, LOC100047211, SPNB2, SPNB1, SCIN, CAPG, SPNA1	1363	25	14219	2.921	1	0.300389	39.9878
GOTERM_BP_ALL	GO:0031032~actomyosin structure organization	7	0.361944	0.027595	ACTG1, LIMCH1, CNN2, MYH6, CNN1, ITGB1, MYH10	1363	25	14219	2.921	1	0.300389	39.9878
GOTERM_BP_ALL	GO:0007605~sensory perception of sound	15	0.775595	0.0279034	COCH, TUB, TMIE, JAG2, GPR98, ESPN, SPRY2, CHD7, SLC1A3, CHRNA9, MARVELD2, MTAP1A, POU4F2, WDR1, MYC	1363	84	14219	1.86288	1	0.302269	40.3341
GOTERM_BP_ALL	GO:0022612~gland morphogenesis	15	0.775595	0.0279034	BMP4, FGFR2, EGFR, RARG, PAX6, DAG1, TGFB1, DDR1, WNT4, BCL2, PHB2, NKX3-1, SEMA3C, PLXND1, ETV4	1363	84	14219	1.86288	1	0.302269	40.3341
GOTERM_BP_ALL	GO:0050954~sensory perception of mechanical stimulus	16	0.827301	0.0280106	COCH, TUB, TMIE, JAG2, GPR98, ESPN, SPRY2, SLC1A3, CHD7, CHRNA9, MARVELD2, MTAP1A, GRIN2D, POU4F2, WDR1, MYC	1363	92	14219	1.81428	1	0.302303	40.4541
GOTERM_BP_ALL	GO:0019933~cAMP-mediated signaling	12	0.620476	0.0287254	CALCR, ADCY2, EIF4EBP2, CHRM4, ADORA2B, PTGER4, GPR44, GRM6, PTH1R, RAPGEF4, RIMS2, FLNA	1363	61	14219	2.05222	1	0.307824	41.2481
GOTERM_BP_ALL	GO:0019932~second-messenger-mediated signaling	19	0.98242	0.0317485	CALCR, GNAT1, ADCY2, ADORA2B, PTGER4, PTH1R, EDN1, RIMS2, FLNA, GNAT2, PLCE1, CHRM4, EIF4EBP2, GPR44, GRM6, TBXA2R, RAPGEF4, LTB, F2R	1363	118	14219	1.67975	1	0.333524	44.4969
GOTERM_BP_ALL	GO:0019220~regulation of phosphate metabolic process	40	2.06825	0.0317548	FGFR3, EDN1, BMPR2, ZEB2, SFN, CD74, SPRY4, LATS2, TRIB1, SPRY2, BCL2, SPRED2, SPRED3, TGFA, RAPGEF4, SPRED1, PPP1R14C, NRG1, PPP1R14B, GHR, BMP4, MDFI, EGFR, VAV3, PKIG, SOCS1, DGKK, PRKCE, PKIA, CISH, THY1, CDKN1C, SH3BP5, ACVR2B, PLCE1, JUN, NRK, DUSP9, GADD45A, F2R	1363	301	14219	1.38633	1	0.332576	44.5034
GOTERM_BP_ALL	GO:0051174~regulation of phosphorus metabolic process	40	2.06825	0.0317548	FGFR3, EDN1, BMPR2, ZEB2, SFN, CD74, SPRY4, LATS2, TRIB1, SPRY2, BCL2, SPRED2, SPRED3, TGFA, RAPGEF4, SPRED1, PPP1R14C, NRG1, PPP1R14B, GHR, BMP4, MDFI, EGFR, VAV3, PKIG, SOCS1, DGKK, PRKCE, PKIA, CISH, THY1, CDKN1C, SH3BP5, ACVR2B, PLCE1, JUN, NRK, DUSP9, GADD45A, F2R	1363	301	14219	1.38633	1	0.332576	44.5034
GOTERM_BP_ALL	GO:0010639~negative regulation of organelle organization	12	0.620476	0.0320095	PFN1, LOC100047211, MTAP2, SPNB2, MTAP1A, SPNB1, SCIN, CAPG, MTAP1B, SPNA1, MID1, ESPN	1363	62	14219	2.01912	1	0.333771	44.7693
GOTERM_BP_ALL	GO:0006350~transcription	193	9.97932	0.0320708	CDX4, ZFP334, BBX, REST, AU015228, CITED2, ZFP94, ZFP473, CREB3L1, TWIST2, TWIST1, PHOX2A, RARG, RCOR2, RXRG, ZFP467, ZFP628, ZHX2, MED14, ZFP74, BAZ1A, PARP14, JUN, ZIM1, VGLL3, CDCA7L, SUPT6H, ZFP619, ZFP618, TAL1, TCF20, PBRM1, LHX6, ARNTL2, NKRF, DNMT3A, KLF6, IKZF4, KLF7, UTF1, KLF12, SMAD7, MAML1, SMAD6, CREBBP, NOTCH3, 9130019O22RIK, ETS1, CSRNP1, JAZF1, RBPJ, TCF15, GM98, ZBTB33, GM14124,…	1363	1772	14219	1.13623	1	0.333301	44.833
GOTERM_BP_ALL	GO:0008360~regulation of cell shape	10	0.517063	0.0321923	CORO1A, SHROOM3, GNA12, ITGA7, GRLF1, SPNA1, MYH14, ARAP3, AKAP2, MYH10	1363	47	14219	2.2196	1	0.333348	44.9593
GOTERM_BP_ALL	GO:0030155~regulation of cell adhesion	16	0.827301	0.0332549	VAV3, SPOCK2, PODXL, JAG2, L1CAM, MMP14, PTEN, SRF, CITED2, DDR1, LAMA4, ITGA6, BCL2, LAMB1-1, SPN, CYR61	1363	94	14219	1.77568	1	0.341355	46.0516
GOTERM_BP_ALL	GO:0051216~cartilage development	14	0.723888	0.0333221	BMP4, FGF18, BMP1, RARG, FGFR3, PTH1R, EDN1, HSPG2, PRRX2, MAPK3, COL11A1, BMP8B, BMP6, BMP8A	1363	78	14219	1.87243	1	0.340918	46.12
GOTERM_BP_ALL	GO:0048562~embryonic organ morphogenesis	24	1.24095	0.033573	FGFR2, BMP4, MDFI, RARG, TMIE, OTX2, EDN1, HSPG2, FZD3, PRRX2, GLI3, EPHA2, FZD6, GLI1, SPRY2, CHD7, CHRNA9, LRP6, GBX2, NEUROD1, WNT9A, COL11A1, MYC, OTOP1	1363	161	14219	1.5551	1	0.342019	46.3747
GOTERM_BP_ALL	GO:0000188~inactivation of MAPK activity	4	0.206825	0.0339962	SPRED2, SPRED3, SPRED1, DUSP9	1363	8	14219	5.21607	1	0.34454	46.8016
GOTERM_BP_ALL	GO:0007406~negative regulation of neuroblast proliferation	4	0.206825	0.0339962	TRP53, BDNF, CTNNA1, TGFB1	1363	8	14219	5.21607	1	0.34454	46.8016
GOTERM_BP_ALL	GO:0010941~regulation of cell death	68	3.51603	0.0354151	SNCB, NUAK2, JAG2, FOXO1, GLI3, PNP, PTEN, TGFB1, CITED2, CTNNBL1, KCNIP3, BAG4, BDNF, ANK2, CUL7, HMOX1, CASP8, MKL1, MYC, LTB, SPN, DHCR24, RAB27A, RARG, ACTN4, SKP2, CTNNA1, DAPK3, BCL2L11, JMY, DAPK1, SMO, AMIGO2, LCK, HIPK2, AVEN, NGFR, CDK5R1, FGFR3, ERBB3, HSPA1A, CX3CL1, HSPA1B, CD74, ADA, MSX2, 2610018G03RIK, BCL2, GLO1, SKIL, TRAF4, RUNX3, BMP4, COL18A1, TRP53, CFLAR, EEF1A2, CIDEB, PEA…	1363	563	14219	1.26001	1	0.355181	48.2095
GOTERM_BP_ALL	GO:0030216~keratinocyte differentiation	10	0.517063	0.0363785	EVPL, PTGS2, PPHLN1, PPL, TGM1, PAX6, TGM3, POU3F1, SFN, RBPJ	1363	48	14219	2.17336	1	0.361944	49.1453
GOTERM_BP_ALL	GO:0043407~negative regulation of MAP kinase activity	6	0.310238	0.036668	SPRY2, SPRED2, SPRED3, SPRED1, DUSP9, SPRY4	1363	20	14219	3.12964	1	0.363235	49.4234
GOTERM_BP_ALL	GO:0006937~regulation of muscle contraction	9	0.465357	0.038172	ANXA6, ADORA2B, SMAD7, CALD1, EDN1, TBXA2R, CACNA1G, ADA, F2R	1363	41	14219	2.28998	1	0.374097	50.845
GOTERM_BP_ALL	GO:0015893~drug transport	5	0.258532	0.0384053	S100A4, ABCB1B, TLR2, SLC18A1, SLC47A1	1363	14	14219	3.72576	1	0.374878	51.0622
GOTERM_BP_ALL	GO:0021511~spinal cord patterning	5	0.258532	0.0384053	SMO, GDF11, PAX6, GLI3, SUFU	1363	14	14219	3.72576	1	0.374878	51.0622
GOTERM_BP_ALL	GO:0035136~forelimb morphogenesis	7	0.361944	0.0391726	CRABP2, LRP6, EN1, WNT9A, MECOM, WNT7A, TWIST1	1363	27	14219	2.70463	1	0.379786	51.7698
GOTERM_BP_ALL	GO:0031333~negative regulation of protein complex assembly	7	0.361944	0.0391726	PFN1, LOC100047211, SPNB2, SPNB1, SCIN, CAPG, SPNA1	1363	27	14219	2.70463	1	0.379786	51.7698
GOTERM_BP_ALL	GO:0032272~negative regulation of protein polymerization	7	0.361944	0.0391726	PFN1, LOC100047211, SPNB2, SPNB1, SCIN, CAPG, SPNA1	1363	27	14219	2.70463	1	0.379786	51.7698
GOTERM_BP_ALL	GO:0007435~salivary gland morphogenesis	7	0.361944	0.0391726	EGFR, FGFR2, PAX6, DAG1, SEMA3C, NKX3-1, PLXND1	1363	27	14219	2.70463	1	0.379786	51.7698
GOTERM_BP_ALL	GO:0002088~lens development in camera-type eye	8	0.41365	0.0393031	BMP4, MIP, PVRL1, POU2F1, PAX6, SKIL, NHS, TGFB1	1363	34	14219	2.45462	1	0.379746	51.8892
GOTERM_BP_ALL	GO:0046660~female sex differentiation	12	0.620476	0.03936	WNT4, CHD7, STRA8, UBE3A, PHB2, BCL2, ADAMTS1, VGF, MMP14, LFNG, TGFB1, KDR	1363	64	14219	1.95603	1	0.379142	51.9412
GOTERM_BP_ALL	GO:0006916~anti-apoptosis	15	0.775595	0.0396821	CFLAR, EEF1A2, SKP2, FOXO1, HSPA1A, HSPA1B, CITED2, DAPK1, BDNF, BCL2, AVEN, GLO1, MAPK8IP1, MKL1, MYC, DHCR24	1363	88	14219	1.7782	1	0.380569	52.2344
GOTERM_BP_ALL	GO:0050808~synapse organization	10	0.517063	0.0409223	KLK8, WNT7B, NRXN2, DLG4, NFASC, GNPAT, NRG1, CACNA1S, WNT7A, F2R	1363	49	14219	2.12901	1	0.388914	53.3475
GOTERM_BP_ALL	GO:0051329~interphase of mitotic cell cycle	10	0.517063	0.0409223	LOC100045551, ANP32B, CCND2, BCL2, SKP2, BRSK1, CAMK2A, GADD45A, ITGB1, LATS2	1363	49	14219	2.12901	1	0.388914	53.3475
GOTERM_BP_ALL	GO:0043069~negative regulation of programmed cell death	33	1.70631	0.0417331	NUAK2, SNCB, ERBB3, FOXO1, HSPA1A, HSPA1B, CX3CL1, PTEN, PNP, ADA, CD74, CITED2, MSX2, BDNF, BCL2, GLO1, MKL1, MYC, DHCR24, TRP53, CFLAR, EEF1A2, SKP2, CTNNA1, DAPK1, AMIGO2, SMO, YWHAH, HIPK2, PLCG2, NEUROD1, AVEN, MAPK8IP1, F2R	1363	244	14219	1.4109	1	0.393919	54.062
GOTERM_BP_ALL	GO:0048738~cardiac muscle tissue development	11	0.568769	0.0425803	SMAD7, HSPG2, ZFPM2, EGLN1, MYH6, NRG1, COL11A1, PTEN, TPM1, ITGB1, MYH10	1363	57	14219	2.01322	1	0.399122	54.7975
GOTERM_BP_ALL	GO:0001657~ureteric bud development	9	0.465357	0.043347	BMP4, FGFR2, RET, BDNF, PGF, BCL2, GDF11, PBX1, GLI3	1363	42	14219	2.23546	1	0.403665	55.4535
GOTERM_BP_ALL	GO:0032386~regulation of intracellular transport	9	0.465357	0.043347	KHDRBS1, SMO, PKIG, TRIP6, PKIA, GLI3, TGFB1, SUFU, FLNA	1363	42	14219	2.23546	1	0.403665	55.4535
GOTERM_BP_ALL	GO:0060548~negative regulation of cell death	33	1.70631	0.0437702	NUAK2, SNCB, ERBB3, FOXO1, HSPA1A, HSPA1B, CX3CL1, PTEN, PNP, ADA, CD74, CITED2, MSX2, BDNF, BCL2, GLO1, MKL1, MYC, DHCR24, TRP53, CFLAR, EEF1A2, SKP2, CTNNA1, DAPK1, AMIGO2, SMO, YWHAH, HIPK2, PLCG2, NEUROD1, AVEN, MAPK8IP1, F2R	1363	245	14219	1.40514	1	0.405669	55.8117
GOTERM_BP_ALL	GO:0043067~regulation of programmed cell death	67	3.46432	0.0442688	SNCB, NUAK2, JAG2, FOXO1, GLI3, PNP, PTEN, TGFB1, CITED2, CTNNBL1, KCNIP3, BAG4, BDNF, ANK2, CUL7, HMOX1, CASP8, MKL1, MYC, LTB, SPN, DHCR24, RAB27A, RARG, ACTN4, SKP2, CTNNA1, DAPK3, BCL2L11, JMY, DAPK1, SMO, AMIGO2, LCK, HIPK2, AVEN, NGFR, CDK5R1, FGFR3, ERBB3, HSPA1A, CX3CL1, HSPA1B, CD74, ADA, MSX2, 2610018G03RIK, BCL2, GLO1, SKIL, TRAF4, RUNX3, COL18A1, TRP53, CFLAR, EEF1A2, CIDEB, PEA15A, Y…	1363	560	14219	1.24813	1	0.408196	56.2302
GOTERM_BP_ALL	GO:0043549~regulation of kinase activity	27	1.39607	0.044618	EDN1, ZEB2, SFN, LATS2, SPRY4, CD74, TRIB1, SPRY2, SPRED2, TGFA, SPRED3, SPRED1, NRG1, MDFI, VAV3, PKIG, DGKK, PKIA, CISH, THY1, SH3BP5, PLCE1, ACVR2B, NRK, DUSP9, GADD45A, F2R	1363	192	14219	1.46702	1	0.409632	56.5211
GOTERM_BP_ALL	GO:0021549~cerebellum development	8	0.41365	0.0452204	SMO, CYP11A1, GBX2, GNPAT, LMX1A, WNT7A, MYH10, GLI1	1363	35	14219	2.38449	1	0.41285	57.0187
GOTERM_BP_ALL	GO:0003006~reproductive developmental process	35	1.80972	0.0458121	FGFR2, HMGB2, UBE3A, SOX3, VGF, PTEN, TGFB1, CITED2, WNT4, LOC100048295, CHD7, STRA8, BCL2, DDX25, PVRL2, NKX3-1, SRD5A1, LFNG, TDRD1, DHCR24, BMP4, RARG, DMRT1, MMP14, JUNB, BCL2L11, KDR, BBS2, PHB2, PBX1, EPOR, BIK, ADAMTS1, WNT7A, TSSK6	1363	264	14219	1.38305	1	0.415956	57.5022
GOTERM_BP_ALL	GO:0001894~tissue homeostasis	10	0.517063	0.0458342	NOX4, CORO1A, TNFSF11, BCL2, ANKRD11, PTH1R, ACACA, ILDR2, F2R, KDR	1363	50	14219	2.08643	1	0.415049	57.5201
GOTERM_BP_ALL	GO:0032880~regulation of protein localization	15	0.775595	0.0467383	ARHGDIG, PKIG, DDX4, SYCP1, GLI3, PKIA, FLNA, SUFU, TGFB1, KCNN4, SMO, BCL2, TRIP6, LTB, ARHGDIA	1363	90	14219	1.73869	1	0.420285	58.2486
GOTERM_BP_ALL	GO:0042307~positive regulation of protein import into nucleus	4	0.206825	0.0474345	SMO, TRIP6, GLI3, FLNA	1363	9	14219	4.6365	1	0.42402	58.8015
GOTERM_BP_ALL	GO:0009125~nucleoside monophosphate catabolic process	4	0.206825	0.0474345	PDE5A, PDE4D, CNP, BC048355	1363	9	14219	4.6365	1	0.42402	58.8015
GOTERM_BP_ALL	GO:0045933~positive regulation of muscle contraction	4	0.206825	0.0474345	EDN1, TBXA2R, ADA, F2R	1363	9	14219	4.6365	1	0.42402	58.8015
GOTERM_BP_ALL	GO:0001822~kidney development	17	0.879007	0.0481456	BMP4, FGFR2, ODC1, RET, PGF, GLI3, BCL2L11, BDNF, ACVR2B, WNT4, LOC100048295, BCL2, GATA3, PAX8, GDF11, PBX1, ADAMTS1	1363	107	14219	1.65744	1	0.427812	59.3592
GOTERM_BP_ALL	GO:0033627~cell adhesion mediated by integrin	3	0.155119	0.0482493	ITGA6, ITGA5, L1CAM	1363	4	14219	7.8241	1	0.42745	59.4399
GOTERM_BP_ALL	GO:0009448~gamma-aminobutyric acid metabolic process	3	0.155119	0.0482493	SLC1A3, PHGDH, ABAT	1363	4	14219	7.8241	1	0.42745	59.4399
GOTERM_BP_ALL	GO:0000059~protein import into nucleus, docking	5	0.258532	0.0485152	IPO13, IPO4, IPO5, XPO7, KPNB1	1363	15	14219	3.47738	1	0.428187	59.6462
GOTERM_BP_ALL	GO:0048634~regulation of muscle development	9	0.465357	0.0489639	BMP4, FGFR2, BCL2, GJA1, NGFR, MBNL3, HDAC9, TGFB1, TWIST1	1363	43	14219	2.18347	1	0.430147	59.992
GOTERM_BP_ALL	GO:0009605~response to external stimulus	75	3.87797	0.0496932	NRP2, JUB, LDHA, NUAK2, FOXA3, TLR2, GJA1, TLR3, TGFB1, DYSF, SLC1A3, CHRNA9, ROBO1, HMOX1, GRIN2D, GPR44, TICAM2, NR2F6, CHRNA7, FOSL1, MYC, LTB, RAB27A, CYR61, TUB, GATM, CYP11A1, F8, MECOM, MMP14, GPR98, PLAUR, CHST1, F5, ARRB1, NGFR, GAP43, SHROOM3, CYSLTR1, ADORA2B, ENPP2, CX3CL1, VARS, TIMP3, IL17D, DOCK2, IL17B, PROCR, GP1BB, BCL2, TEK, SCN9A, ETV1, PAPSS2, MEST, OTOP1, TRP53, GNAT1, GUCA1…	1363	640	14219	1.22252	1	0.433957	60.5481
GOTERM_BP_ALL	GO:0009266~response to temperature stimulus	10	0.517063	0.0511233	XYLT1, BCL2, TRPV2, ST8SIA1, NR2F6, HSPB2, HSPA1A, HSPA1B, NGFR, VGF, PCSK1N	1363	51	14219	2.04552	1	0.442322	61.6176
GOTERM_BP_ALL	GO:0010551~regulation of specific transcription from RNA polymerase II promoter	10	0.517063	0.0511233	CEBPA, TAL1, HMGB2, RARG, FOXJ1, MLXIPL, PAX6, NFKB1, MYC, CITED2	1363	51	14219	2.04552	1	0.442322	61.6176
GOTERM_BP_ALL	GO:0009913~epidermal cell differentiation	10	0.517063	0.0511233	EVPL, PTGS2, PPHLN1, PPL, TGM1, PAX6, TGM3, POU3F1, SFN, RBPJ	1363	51	14219	2.04552	1	0.442322	61.6176
GOTERM_BP_ALL	GO:0051325~interphase	10	0.517063	0.0511233	LOC100045551, ANP32B, CCND2, BCL2, SKP2, BRSK1, CAMK2A, GADD45A, ITGB1, LATS2	1363	51	14219	2.04552	1	0.442322	61.6176
GOTERM_BP_ALL	GO:0009187~cyclic nucleotide metabolic process	8	0.41365	0.0516798	ADCY1, ADCY2, ADCY7, ADCY6, PDE5A, PDE4D, CNP, GUCY1B3	1363	36	14219	2.31825	1	0.444877	62.0263
GOTERM_BP_ALL	GO:0045859~regulation of protein kinase activity	26	1.34436	0.0518693	MDFI, PKIG, EDN1, DGKK, ZEB2, SFN, PKIA, CD74, CISH, SPRY4, LATS2, THY1, TRIB1, SH3BP5, SPRY2, ACVR2B, PLCE1, SPRED2, SPRED3, TGFA, NRK, SPRED1, DUSP9, NRG1, GADD45A, F2R	1363	186	14219	1.45826	1	0.445036	62.1645
GOTERM_BP_ALL	GO:0042472~inner ear morphogenesis	12	0.620476	0.0524608	FGFR2, SPRY2, CHD7, CHRNA9, TMIE, OTX2, GBX2, FZD3, PRRX2, COL11A1, FZD6, OTOP1	1363	67	14219	1.86844	1	0.447781	62.5929
GOTERM_BP_ALL	GO:0032583~regulation of gene-specific transcription	12	0.620476	0.0524608	CEBPA, TAL1, HMGB2, RARG, FOXJ1, MLXIPL, PAX6, CELSR2, NFKB1, SMARCA1, MYC, CITED2	1363	67	14219	1.86844	1	0.447781	62.5929
GOTERM_BP_ALL	GO:0007613~memory	7	0.361944	0.0534363	ACCN2, KLK8, ADCY1, ITGA5, ATP1A3, CHRNA7, ITGA3	1363	29	14219	2.5181	1	0.452939	63.2895
GOTERM_BP_ALL	GO:0051049~regulation of transport	37	1.91313	0.0540568	STON2, RAB3B, STON1, ADORA2B, SYT4, RAB3D, EDN1, GLI3, TGFB1, SUFU, ADA, PACSIN1, GP1BB, HMOX1, BCL2, RAPGEF4, CHRNA7, CAMK2A, LTB, KHDRBS1, ATP4A, PFKL, ACTN4, PKIG, STIM2, PARK2, PEA15A, PKIA, FLNA, THY1, KCNN4, SMO, GRB10, PLCG2, TRIP6, BIN1, F2R	1363	286	14219	1.34961	1	0.455792	63.7261
GOTERM_BP_ALL	GO:0007268~synaptic transmission	25	1.29266	0.054242	SYT1, CPLX1, SYT4, CACNB2, SYP, SYN1, GRIN2D, APBA2, CHRNA7, SV2A, NRG1, KLK8, SLC25A4, NRXN2, STXBP1, GRIA4, PARK2, STX1B, SLC17A7, GRM6, TMOD2, ABAT, NCAN, WNT7A, CACNA1B	1363	178	14219	1.46519	1	0.455887	63.8555
GOTERM_BP_ALL	GO:0001558~regulation of cell growth	15	0.775595	0.0546263	TRP53, IGFBPL1, FOXK1, IGFBP7, LMX1A, SFN, TGFB1, NOV, DDR1, BBC3, BCL2, TRO, BC048355, CRIM1, CYR61	1363	92	14219	1.70089	1	0.457225	64.1226
GOTERM_BP_ALL	GO:0051726~regulation of cell cycle	29	1.49948	0.0552956	E2F2, FOXK1, RPRM, BRSK1, SFN, ITGB1, PTEN, LATS2, TGFB1, CITED2, CCNE1, STRA8, CUL7, BCL2, TGFA, LTB, MYC, RUNX3, TRP53, GM7334, SKP2, DBC1, PKIA, JUNB, OBFC2B, YWHAH, CCND2, JUN, GADD45A	1363	214	14219	1.4137	1	0.460321	64.5832
GOTERM_BP_ALL	GO:0003001~generation of a signal involved in cell-cell signaling	14	0.723888	0.055848	SYT1, BDNF, ACVR2B, CPLX1, SYN1, NRXN2, SYT4, ILDR2, RAPGEF4, VGF, RIMS2, WNT7A, SMPD3, CACNA1B	1363	84	14219	1.73869	1	0.462664	64.9592
GOTERM_BP_ALL	GO:0042221~response to chemical stimulus	100	5.17063	0.0569103	S100A4, PTGS2, ARNT2, EDN1, TLR2, TLR3, FOXO1, ILDR2, MMP2, TGFB1, CITED2, BDNF, EIF4EBP2, ROBO1, GPR44, LCAT, CREB3L1, CHRNA7, IRS2, GATM, ACTN4, SNRPN, VASH1, GLUL, ABCB1B, JUN, MAPK3, PDE5A, ABAT, KCNMB4, HMGB2, CYSLTR1, ENPP2, CX3CL1, LIN28A, TIMP3, LIN28B, MANF, DOCK2, ECE1, IL17B, TEK, MEST, TRP53, S100A16, CORO1A, ECSCR, PLCG2, CACNA1G, PTPN1, GRK5, NRP2, GPR83, PXDN, BCAR1, VGF, LATS2, SL…	1363	887	14219	1.17611	1	0.468092	65.6717
GOTERM_BP_ALL	GO:0007187~G-protein signaling, coupled to cyclic nucleotide second messenger	11	0.568769	0.0574785	CALCR, GNAT1, ADCY2, CHRM4, ADORA2B, PTGER4, GPR44, GRM6, PTH1R, FLNA, GNAT2	1363	60	14219	1.91256	1	0.470463	66.0471
GOTERM_BP_ALL	GO:0048732~gland development	27	1.39607	0.0578021	FGFR2, UBE3A, PAX6, DAG1, PTEN, GLI3, TGFB1, GLI1, CITED2, WNT4, BCL2, PAX8, TGFA, SEMA3C, NKX3-1, PLXND1, ETV4, EGFR, BMP4, IRS2, RARG, BCL2L11, DDR1, TNFSF11, PHB2, PBX1, RBPJ	1363	197	14219	1.42978	1	0.471344	66.2592
GOTERM_BP_ALL	GO:0009952~anterior/posterior pattern formation	22	1.13754	0.0585829	TRP53, ARC, RARG, OTX2, PAX6, BMPR2, DLL3, ZEB2, EN1, GLI3, ZIC3, ACVR2B, SFRP2, HIPK2, GDF11, LRP6, GBX2, NKX3-1, NEUROD1, PBX1, LFNG, TCF15	1363	153	14219	1.50005	1	0.474945	66.7658
GOTERM_BP_ALL	GO:0014706~striated muscle tissue development	19	0.98242	0.0588605	CAV2, SMAD7, PDLIM3, RXRG, HSPG2, EGLN1, MYH6, PTEN, CACNA1S, FLNB, ITGB1, TPM1, TGFB1, MYL6B, ZFPM2, NRG1, COL11A1, F2R, MYH10	1363	127	14219	1.56071	1	0.475529	66.9442
GOTERM_BP_ALL	GO:0009968~negative regulation of signal transduction	24	1.24095	0.0598527	TRP53, MDFI, PLD2, SOCS1, FSTL3, RGS19, RGS16, PTEN, CISH, SUFU, THY1, SPRY2, RGS20, WNT4, GRB10, RGS2, PHB2, LRP6, NKX3-1, UBASH3A, SKIL, HHIP, NGFR, ARAP3	1363	171	14219	1.46416	1	0.480312	67.5743
GOTERM_BP_ALL	GO:0002027~regulation of heart rate	5	0.258532	0.0599443	CACNA1G, CHRNA7, MYH6, TPM1, ADA	1363	16	14219	3.26004	1	0.479785	67.632
GOTERM_BP_ALL	GO:0060070~Wnt receptor signaling pathway through beta-catenin	5	0.258532	0.0599443	SDC1, RSPO1, LRP6, SOX4, WNT9A	1363	16	14219	3.26004	1	0.479785	67.632
GOTERM_BP_ALL	GO:0031668~cellular response to extracellular stimulus	9	0.465357	0.0615592	TRP53, LDHA, ITGA6, ADORA2B, NUAK2, FOXA3, SFRP2, HMOX1, FOSL1	1363	45	14219	2.08643	1	0.488085	68.6317
GOTERM_BP_ALL	GO:0019228~regulation of action potential in neuron	9	0.465357	0.0615592	KCNMB4, GM98, EGR2, UGT8A, GNPAT, CHRNA7, POU3F1, NRG1, TGFB1	1363	45	14219	2.08643	1	0.488085	68.6317
GOTERM_BP_ALL	GO:0009124~nucleoside monophosphate biosynthetic process	9	0.465357	0.0615592	ADCY1, ADCY2, ADCY7, ATIC, ADCY6, GUCY1B3, IMPDH1, PRPS2, ADA	1363	45	14219	2.08643	1	0.488085	68.6317
GOTERM_BP_ALL	GO:0001667~ameboidal cell migration	9	0.465357	0.0615592	NRP2, SMO, RET, FGF15, CFL1, GBX2, LRP6, SEMA3C, ZEB2	1363	45	14219	2.08643	1	0.488085	68.6317
GOTERM_BP_ALL	GO:0045765~regulation of angiogenesis	9	0.465357	0.0615592	COL4A2, ADORA2B, ID1, STAB1, TEK, ADAMTS1, CX3CL1, VASH2, VASH1	1363	45	14219	2.08643	1	0.488085	68.6317
GOTERM_BP_ALL	GO:0051100~negative regulation of binding	7	0.361944	0.0616054	MDFI, SMO, ZFP462, FOXJ1, HMOX1, MYC, FLNA	1363	30	14219	2.43416	1	0.487285	68.6599
GOTERM_BP_ALL	GO:0010817~regulation of hormone levels	19	0.98242	0.0626379	CPLX1, CYP11A1, RBP1, CRABP2, ILDR2, VGF, RIMS2, PCSK1, WNT4, ACVR2B, YWHAH, ECE1, CPE, HSD11B2, RAPGEF4, SRD5A1, PCSK1N, SMPD3, CRYM	1363	128	14219	1.54852	1	0.492113	69.2832
GOTERM_BP_ALL	GO:0001754~eye photoreceptor cell differentiation	6	0.310238	0.0627695	GNAT1, MIAT, OTX2, PAX6, THY1, GNAT2	1363	23	14219	2.72143	1	0.491796	69.3618
GOTERM_BP_ALL	GO:0016486~peptide hormone processing	4	0.206825	0.0630598	PCSK1, ECE1, CPE, PCSK1N	1363	10	14219	4.17285	1	0.492376	69.5345
GOTERM_BP_ALL	GO:0001892~embryonic placenta development	11	0.568769	0.0631163	CEBPA, MDFI, EGFR, FGFR2, WNT7B, GCM1, PLCD1, EGLN1, JUNB, CYR61, CITED2	1363	61	14219	1.8812	1	0.491637	69.568
GOTERM_BP_ALL	GO:0042981~regulation of apoptosis	65	3.36091	0.063457	SNCB, NUAK2, JAG2, FOXO1, GLI3, PNP, PTEN, TGFB1, CITED2, CTNNBL1, KCNIP3, BAG4, BDNF, ANK2, CUL7, HMOX1, CASP8, MKL1, MYC, LTB, SPN, DHCR24, RAB27A, RARG, ACTN4, SKP2, CTNNA1, DAPK3, BCL2L11, JMY, DAPK1, SMO, LCK, HIPK2, AVEN, NGFR, CDK5R1, FGFR3, ERBB3, HSPA1A, HSPA1B, CX3CL1, CD74, ADA, MSX2, 2610018G03RIK, BCL2, GLO1, SKIL, TRAF4, RUNX3, COL18A1, TRP53, CFLAR, EEF1A2, CIDEB, PEA15A, YWHAH, VC…	1363	553	14219	1.2262	1	0.492497	69.7693
GOTERM_BP_ALL	GO:0051338~regulation of transferase activity	27	1.39607	0.0637835	EDN1, ZEB2, SFN, LATS2, SPRY4, CD74, TRIB1, SPRY2, SPRED2, TGFA, SPRED3, SPRED1, NRG1, MDFI, VAV3, PKIG, DGKK, PKIA, CISH, THY1, SH3BP5, PLCE1, ACVR2B, NRK, DUSP9, GADD45A, F2R	1363	199	14219	1.41542	1	0.493273	69.9611
GOTERM_BP_ALL	GO:0001655~urogenital system development	21	1.08583	0.0647782	BMP4, FGFR2, ODC1, RET, RARG, PGF, UBE3A, PTEN, GLI3, BCL2L11, BDNF, WNT4, ACVR2B, LOC100048295, BCL2, GATA3, PAX8, GDF11, NKX3-1, PBX1, ADAMTS1	1363	146	14219	1.50051	1	0.497745	70.5381
GOTERM_BP_ALL	GO:0050768~negative regulation of neurogenesis	8	0.41365	0.0662587	TRP53, KLK8, BDNF, YWHAH, CTNNA1, TGFB1, EPHB2, THY1	1363	38	14219	2.19624	1	0.504804	71.3777
GOTERM_BP_ALL	GO:0046700~heterocycle catabolic process	9	0.465357	0.0685502	MTHFD1, KYNU, HDC, HMOX1, PDE5A, PDE4D, PNP, ADA, MOXD1	1363	46	14219	2.04107	1	0.516059	72.6327
GOTERM_BP_ALL	GO:0001505~regulation of neurotransmitter levels	11	0.568769	0.0690984	SLC17A7, SYT1, CPLX1, SYN1, NRXN2, SLC25A4, SYT4, ABAT, PARK2, WNT7A, CACNA1B	1363	62	14219	1.85086	1	0.5179	72.9251
GOTERM_BP_ALL	GO:0009725~response to hormone stimulus	23	1.18925	0.0696674	GPR83, HMGB2, IRS2, EGR2, GATM, CYP11A1, SNRPN, BCAR1, FOXO1, CFTR, STXBP4, VGF, MMP14, TIMP3, LATS2, SCAP, EIF4EBP2, HMOX1, LCAT, BCL2, SORT1, PTPN1, GHR	1363	165	14219	1.45418	1	0.519834	73.2255
GOTERM_BP_ALL	GO:0051789~response to protein stimulus	14	0.723888	0.0702724	MSX2, DDR1, ID2, ID1, BCL2, HSPA4L, CREB3L1, ID3, DGKI, VARS, TGFB1, MANF, VASH1, CYR61	1363	87	14219	1.67873	1	0.521939	73.5414
GOTERM_BP_ALL	GO:0007431~salivary gland development	7	0.361944	0.0704714	EGFR, FGFR2, PAX6, DAG1, SEMA3C, NKX3-1, PLXND1	1363	31	14219	2.35564	1	0.521919	73.6446
GOTERM_BP_ALL	GO:0006820~anion transport	19	0.98242	0.0706841	SLC5A5, GABRA2, SLC25A4, GABRA4, GABRA3, SLC12A4, GABRA5, CFTR, SLC26A2, SLC10A1, SLC16A3, BEST1, SLC1A3, SLC16A7, SLC1A6, SLCO3A1, SLC4A4, SLC4A3, CLCN5	1363	130	14219	1.5247	1	0.521971	73.7544
GOTERM_BP_ALL	GO:0048608~reproductive structure development	19	0.98242	0.0706841	FGFR2, BMP4, HMGB2, RARG, UBE3A, VGF, MMP14, PTEN, BCL2L11, KDR, WNT4, LOC100048295, STRA8, BCL2, NKX3-1, ADAMTS1, BIK, LFNG, WNT7A	1363	130	14219	1.5247	1	0.521971	73.7544
GOTERM_BP_ALL	GO:0016265~death	61	3.15408	0.0709547	STEAP3, E2F2, 1810011O10RIK, NUAK2, EIF5A, NFKB1, PTEN, TGFB1, CTNNBL1, KCNIP3, BAG4, ANK2, CUL7, BAG2, CASP8, MMD2, MYC, LTB, CUL1, BCL7C, TWIST1, GAN, STK4, DAPK3, PURB, BCL2L11, DAPK1, LCK, HIPK2, SH3KBP1, AVEN, NGFR, TNFAIP3, PEG3, GULP1, PEG10, ECE1, 2610018G03RIK, BCL2, TRAF4, PHLDA1, TRP53, CFLAR, KLK8, PDCD11, AIMP2, CIDEB, DBC1, PEA15A, SEMA6A, VCP, ID1, BBC3, CSRNP1, SULF1, CYFIP2, PERP…	1363	519	14219	1.22613	1	0.522321	73.8935
GOTERM_BP_ALL	GO:0008283~cell proliferation	32	1.6546	0.0717937	FGFR2, PGF, E2F8, ZEB2, SFN, TGFB1, CD74, HDGFRP3, SRRT, DOCK2, BCL2, PLA2G1B, GBX2, NKX3-1, HHIP, IMPDH1, COL8A2, CUL1, ACSL6, BMP4, GNAT1, TRP53, FZD9, IRS2, KLK8, CREBBP, MMP14, PURB, TNFSF11, PELO, LRP2, MYH10	1363	247	14219	1.35153	1	0.525586	74.3204
GOTERM_BP_ALL	GO:0031644~regulation of neurological system process	17	0.879007	0.0722954	GM98, KLK8, EGR2, EDN1, NCS1, STXBP1, PARK2, EPHB2, SYP, BDNF, SLC1A3, GRIN2D, DLG4, CHRNA7, LTB, CAMK2A, F2R	1363	113	14219	1.56944	1	0.527099	74.5725
GOTERM_BP_ALL	GO:0006811~ion transport	81	4.18821	0.0723038	STEAP3, SLC5A5, SLC9A7, TRPV2, KCNJ10, SLC26A2, KCNIP3, SLC23A1, SLC1A3, CHRNA9, KCNK6, GRIN2D, SLC1A6, SLC24A1, CHRNA7, KCNG3, SLC4A4, SLC4A3, KCNG1, ANO8, NIPAL4, KCND1, ATP4A, SLC25A4, CACNG7, STIM2, KCTD21, CACNG4, CFTR, PRKCB, LCK, KCNH6, KCTD12B, PLLP, SLC40A1, STEAP1, SLC39A14, KCNMB4, SLC38A3, SLC38A2, CYSLTR1, SLC39A10, CACNB2, KCNJ3, ANXA6, TTYH3, SLC5A4B, BEST1, SCN9A, SLC39A8, SLCO3A1…	1363	712	14219	1.1868	1	0.526099	74.5767
GOTERM_BP_ALL	GO:0010608~posttranscriptional regulation of gene expression	21	1.08583	0.0724479	CALCR, ZFP36, EIF4E3, STXBP1, SOX4, IGF2BP1, EIF5A, MAPKAPK2, LIN28A, PTEN, SAMD4, LIN28B, FLNA, EIF4G1, EIF4G2, SRRT, SMO, EIF4G3, EIF4EBP2, DDX25, BCL2	1363	148	14219	1.48024	1	0.525792	74.6486
GOTERM_BP_ALL	GO:0046058~cAMP metabolic process	5	0.258532	0.0726659	ADCY1, ADCY2, ADCY7, ADCY6, PDE4D	1363	17	14219	3.06827	1	0.52586	74.7572
GOTERM_BP_ALL	GO:0010552~positive regulation of specific transcription from RNA polymerase II promoter	6	0.310238	0.0732972	CEBPA, HMGB2, RARG, MLXIPL, NFKB1, CITED2	1363	24	14219	2.60803	1	0.528008	75.0689
GOTERM_BP_ALL	GO:0030834~regulation of actin filament depolymerization	6	0.310238	0.0732972	SPNB2, SPNB1, CFL1, SCIN, CAPG, SPNA1	1363	24	14219	2.60803	1	0.528008	75.0689
GOTERM_BP_ALL	GO:0009719~response to endogenous stimulus	25	1.29266	0.0737013	GPR83, HMGB2, IRS2, EGR2, GATM, CYP11A1, SNRPN, BCAR1, FOXO1, CFTR, STXBP4, VGF, MMP14, TIMP3, LATS2, SCAP, SLC1A3, EIF4EBP2, HMOX1, LCAT, BCL2, CFL1, SORT1, PTPN1, GHR	1363	184	14219	1.41741	1	0.529001	75.2665
GOTERM_BP_ALL	GO:0009612~response to mechanical stimulus	8	0.41365	0.0743872	SLC1A3, CHRNA9, GRIN2D, ETV1, MMP14, MYC, LTB, GPR98	1363	39	14219	2.13993	1	0.531389	75.5986
GOTERM_BP_ALL	GO:0015711~organic anion transport	8	0.41365	0.0743872	SLC16A3, SLC1A3, SLC16A7, SLC25A4, SLC1A6, SLCO3A1, SLC4A4, SLC10A1	1363	39	14219	2.13993	1	0.531389	75.5986
GOTERM_BP_ALL	GO:0009214~cyclic nucleotide catabolic process	3	0.155119	0.0753745	PDE5A, PDE4D, CNP	1363	5	14219	6.25928	1	0.535236	76.0692
GOTERM_BP_ALL	GO:0040037~negative regulation of fibroblast growth factor receptor signaling pathway	3	0.155119	0.0753745	SPRY2, WNT4, NGFR	1363	5	14219	6.25928	1	0.535236	76.0692
GOTERM_BP_ALL	GO:0060762~regulation of branching involved in mammary gland duct morphogenesis	3	0.155119	0.0753745	PHB2, TGFB1, ETV4	1363	5	14219	6.25928	1	0.535236	76.0692
GOTERM_BP_ALL	GO:0043066~negative regulation of apoptosis	31	1.6029	0.0754072	NUAK2, SNCB, ERBB3, FOXO1, HSPA1A, HSPA1B, CX3CL1, PTEN, PNP, ADA, CD74, CITED2, MSX2, BDNF, BCL2, GLO1, MKL1, MYC, DHCR24, TRP53, CFLAR, EEF1A2, SKP2, CTNNA1, DAPK1, SMO, YWHAH, HIPK2, NEUROD1, AVEN, MAPK8IP1, F2R	1363	239	14219	1.35312	1	0.534369	76.0846
GOTERM_BP_ALL	GO:0015833~peptide transport	9	0.465357	0.0760083	ACVR2B, CPLX1, SLC15A2, ILDR2, RAPGEF4, SLCO3A1, VGF, RIMS2, SMPD3	1363	47	14219	1.99764	1	0.536286	76.3668
GOTERM_BP_ALL	GO:0022602~ovulation cycle process	9	0.465357	0.0760083	STRA8, UBE3A, BCL2, CHRNA7, ADAMTS1, VGF, MMP14, LFNG, KDR	1363	47	14219	1.99764	1	0.536286	76.3668
GOTERM_BP_ALL	GO:0048663~neuron fate commitment	9	0.465357	0.0760083	BMP4, NOTCH3, OTX2, PAX6, JAG2, LHX6, NRG1, GLI3, FOXN4	1363	47	14219	1.99764	1	0.536286	76.3668
GOTERM_BP_ALL	GO:0046903~secretion	29	1.49948	0.0763454	STEAP3, SYT1, CPLX1, SYT4, RAB3D, EXOC8, EDN1, ILDR2, VGF, RIMS2, RIMS4, RIMS3, BDNF, SYN1, KIRREL, RAPGEF4, CAR2, RAB27A, TRPC1, NRXN2, STXBP1, KCNN4, ACVR2B, TRIM36, SCFD2, WNT7A, SMPD3, CACNA1B, MYH10	1363	221	14219	1.36892	1	0.536905	76.5236
GOTERM_BP_ALL	GO:0000165~MAPKKK cascade	17	0.879007	0.0769836	MDFI, RET, FGFR3, FGF14, FGF13, SHANK3, CD74, PLCE1, SPRED2, SPRED3, TGFA, NRK, SPRED1, MAPK8IP1, DUSP9, NRG1, F2R	1363	114	14219	1.55567	1	0.538975	76.8178
GOTERM_BP_ALL	GO:0002520~immune system development	37	1.91313	0.0772636	CALCR, LRRC8A, JAG2, SOX4, NFKB1, TGFB1, ADA, CD74, TAL1, DOCK2, BCL2, CASP8, BCL11A, SPIB, TCEA1, LTB, SPN, CEBPA, BMP4, TRP53, ICOSL, CRIP2, FOXJ1, JARID2, CDK6, BCL2L11, KDR, TNFSF11, RPS19, ID2, PLCG2, LCK, IRF8, SPNA1, PBX1, RBPJ, HDAC9	1363	295	14219	1.30844	1	0.539306	76.9458
GOTERM_BP_ALL	GO:0006576~biogenic amine metabolic process	13	0.672182	0.0780054	ODC1, KYNU, SNCB, PARK2, MOXD1, GATA3, HDC, PEMT, ETNK2, CHRNA7, SMS, FABP5, ALDH9A1	1363	80	14219	1.69522	1	0.541846	77.2817
GOTERM_BP_ALL	GO:0060041~retina development in camera-type eye	7	0.361944	0.0800321	BHLHE22, PVRL1, LRP6, POU4F2, MYH10, THY1, GNAT2	1363	32	14219	2.28203	1	0.550414	78.1759
GOTERM_BP_ALL	GO:0017157~regulation of exocytosis	7	0.361944	0.0800321	RAB3B, RAB3D, ADORA2B, SYT4, GP1BB, HMOX1, RAPGEF4	1363	32	14219	2.28203	1	0.550414	78.1759
GOTERM_BP_ALL	GO:0007173~epidermal growth factor receptor signaling pathway	4	0.206825	0.0807233	EGFR, BCAR1, TGFA, HBEGF	1363	11	14219	3.7935	1	0.552623	78.4732
GOTERM_BP_ALL	GO:0040036~regulation of fibroblast growth factor receptor signaling pathway	4	0.206825	0.0807233	SPRY2, WNT4, NGFR, HHIP	1363	11	14219	3.7935	1	0.552623	78.4732
GOTERM_BP_ALL	GO:0050856~regulation of T cell receptor signaling pathway	4	0.206825	0.0807233	LCK, UBASH3A, ADA, THY1	1363	11	14219	3.7935	1	0.552623	78.4732
GOTERM_BP_ALL	GO:0048635~negative regulation of muscle development	4	0.206825	0.0807233	BMP4, NGFR, HDAC9, TWIST1	1363	11	14219	3.7935	1	0.552623	78.4732
GOTERM_BP_ALL	GO:0010648~negative regulation of cell communication	25	1.29266	0.081132	FSTL3, PTEN, SUFU, SPRY2, WNT4, NKX3-1, UBASH3A, HHIP, SKIL, MDFI, TRP53, PLD2, SOCS1, STXBP1, RGS19, RGS16, CISH, THY1, GRB10, RGS20, RGS2, PHB2, LRP6, NGFR, ARAP3	1363	186	14219	1.40217	1	0.553504	78.6471
GOTERM_BP_ALL	GO:0010721~negative regulation of cell development	8	0.41365	0.0830757	TRP53, KLK8, BDNF, YWHAH, CTNNA1, TGFB1, EPHB2, THY1	1363	40	14219	2.08643	1	0.561406	79.4565
GOTERM_BP_ALL	GO:0006519~cellular amino acid and derivative metabolic process	37	1.91313	0.0832413	KYNU, OCLN, SNCB, AASS, EIF5A, CAD, VARS, OTUB2, KARS, MTHFD1, SLC1A3, HDC, ARG2, GSTK1, GATA3, GPX3, PEMT, GCSH, ETNK2, CHRNA7, GHR, ODC1, GATM, GSTT1, LOC100048650, PARK2, DARS2, MOXD1, GLUL, 4930402E16RIK, GFPT2, PHGDH, ABAT, SMS, FABP5, ALDH9A1, MGST1	1363	297	14219	1.29963	1	0.561144	79.5241
GOTERM_BP_ALL	GO:0007179~transforming growth factor beta receptor signaling pathway	9	0.465357	0.0839342	TRP53, LTBP1, SMAD7, SMAD6, HIPK2, SKIL, BMP8B, TGFB1, BMP8A	1363	48	14219	1.95603	1	0.563266	79.8047
GOTERM_BP_ALL	GO:0042698~ovulation cycle	9	0.465357	0.0839342	STRA8, UBE3A, BCL2, CHRNA7, ADAMTS1, VGF, MMP14, LFNG, KDR	1363	48	14219	1.95603	1	0.563266	79.8047
GOTERM_BP_ALL	GO:0051345~positive regulation of hydrolase activity	13	0.672182	0.0839935	TRP53, FOXJ1, PTH1R, EDN1, THY1, PLCE1, ARHGAP6, VCP, BBC3, SH3D20, LCK, MYC, F2R	1363	81	14219	1.67429	1	0.562523	79.8285
GOTERM_BP_ALL	GO:0002521~leukocyte differentiation	20	1.03413	0.0846522	CEBPA, CALCR, TRP53, LRRC8A, JAG2, SOX4, ADA, TGFB1, CD74, DOCK2, TNFSF11, BCL2, LCK, BCL11A, PLCG2, CASP8, SPIB, RBPJ, HDAC9, SPN	1363	142	14219	1.46931	1	0.564471	80.0915
GOTERM_BP_ALL	GO:0060688~regulation of morphogenesis of a branching structure	6	0.310238	0.0847227	BMP4, FGFR2, PGF, PHB2, TGFB1, ETV4	1363	25	14219	2.50371	1	0.563783	80.1195
GOTERM_BP_ALL	GO:0006940~regulation of smooth muscle contraction	6	0.310238	0.0847227	ADORA2B, CALD1, EDN1, TBXA2R, ADA, F2R	1363	25	14219	2.50371	1	0.563783	80.1195
GOTERM_BP_ALL	GO:0031647~regulation of protein stability	6	0.310238	0.0847227	SMO, BCL2, STXBP1, SOX4, PTEN, FLNA	1363	25	14219	2.50371	1	0.563783	80.1195
GOTERM_BP_ALL	GO:0021545~cranial nerve development	5	0.258532	0.0866365	EGR2, SLC1A3, ERBB3, GLI3, EPHB2	1363	18	14219	2.89782	1	0.571251	80.8645
GOTERM_BP_ALL	GO:0048483~autonomic nervous system development	5	0.258532	0.0866365	PHOX2A, RET, EGR2, GATA3, GBX2	1363	18	14219	2.89782	1	0.571251	80.8645
GOTERM_BP_ALL	GO:0008219~cell death	59	3.05067	0.0872843	STEAP3, E2F2, 1810011O10RIK, NUAK2, EIF5A, NFKB1, PTEN, TGFB1, CTNNBL1, KCNIP3, BAG4, ANK2, CUL7, BAG2, CASP8, MMD2, LTB, MYC, CUL1, BCL7C, TWIST1, GAN, STK4, DAPK3, PURB, BCL2L11, DAPK1, LCK, HIPK2, SH3KBP1, AVEN, NGFR, TNFAIP3, PEG3, GULP1, PEG10, ECE1, 2610018G03RIK, BCL2, TRAF4, PHLDA1, TRP53, CFLAR, KLK8, PDCD11, AIMP2, CIDEB, DBC1, PEA15A, SEMA6A, VCP, ID1, BBC3, CSRNP1, SULF1, CYFIP2, PERP…	1363	507	14219	1.214	1	0.573082	81.1107
GOTERM_BP_ALL	GO:0051493~regulation of cytoskeleton organization	15	0.775595	0.0892083	LOC100047211, MTAP2, MID1, NEXN, ESPN, PFN1, CORO1A, MTAP1A, SPNB2, SPNB1, CAPG, MTAP1B, SCIN, CFL1, SPNA1	1363	99	14219	1.58063	1	0.580393	81.8242
GOTERM_BP_ALL	GO:0060341~regulation of cellular localization	22	1.13754	0.0896618	KHDRBS1, RAB3B, ADORA2B, SYT4, PFKL, RAB3D, PKIG, EDN1, PARK2, PKIA, GLI3, FLNA, SUFU, TGFB1, SMO, KCNN4, GP1BB, HMOX1, RAPGEF4, CHRNA7, TRIP6, CAMK2A	1363	161	14219	1.42551	1	0.581331	81.9886
GOTERM_BP_ALL	GO:0060443~mammary gland morphogenesis	7	0.361944	0.0902803	BMP4, FGFR2, DDR1, WNT4, PHB2, TGFB1, ETV4	1363	33	14219	2.21288	1	0.582962	82.2106
GOTERM_BP_ALL	GO:0001541~ovarian follicle development	7	0.361944	0.0902803	STRA8, UBE3A, BCL2, VGF, MMP14, LFNG, KDR	1363	33	14219	2.21288	1	0.582962	82.2106
GOTERM_BP_ALL	GO:0046545~development of primary female sexual characteristics	10	0.517063	0.0911082	WNT4, CHD7, STRA8, UBE3A, BCL2, ADAMTS1, VGF, MMP14, LFNG, KDR	1363	57	14219	1.8302	1	0.585461	82.5038
GOTERM_BP_ALL	GO:0048534~hemopoietic or lymphoid organ development	35	1.80972	0.0918224	CALCR, LRRC8A, JAG2, SOX4, NFKB1, TGFB1, ADA, CD74, TAL1, DOCK2, BCL2, CASP8, BCL11A, SPIB, TCEA1, LTB, SPN, CEBPA, TRP53, BMP4, CRIP2, JARID2, CDK6, BCL2L11, KDR, TNFSF11, RPS19, ID2, LCK, IRF8, PLCG2, SPNA1, PBX1, RBPJ, HDAC9	1363	281	14219	1.29938	1	0.58746	82.7529
GOTERM_BP_ALL	GO:0007156~homophilic cell adhesion	17	0.879007	0.0922243	RET, PTPRF, CLSTN3, CELSR2, L1CAM, PCDH17, CDH3, AMIGO2, PCDH1, CDH9, PVRL1, FAT1, PVRL2, ESAM, CDH10, CDH24, CDH11	1363	117	14219	1.51578	1	0.588143	82.8917
GOTERM_BP_ALL	GO:0007190~activation of adenylate cyclase activity	8	0.41365	0.0923205	CALCR, ADCY1, ADCY2, ADORA2B, ADCY7, PTGER4, ADCY6, PTH1R	1363	41	14219	2.03554	1	0.587554	82.9247
GOTERM_BP_ALL	GO:0035272~exocrine system development	8	0.41365	0.0923205	EGFR, FGFR2, PAX6, DAG1, SOX4, SEMA3C, NKX3-1, PLXND1	1363	41	14219	2.03554	1	0.587554	82.9247
GOTERM_BP_ALL	GO:0060627~regulation of vesicle-mediated transport	13	0.672182	0.0968082	STON2, RAB3B, STON1, ACTN4, RAB3D, SYT4, ADORA2B, TGFB1, PACSIN1, GP1BB, HMOX1, RAPGEF4, BIN1	1363	83	14219	1.63395	1	0.604838	84.4013
GOTERM_BP_ALL	GO:0060603~mammary gland duct morphogenesis	6	0.310238	0.0970242	FGFR2, DDR1, WNT4, PHB2, TGFB1, ETV4	1363	26	14219	2.40742	1	0.604711	84.4692
GOTERM_BP_ALL	GO:0043392~negative regulation of DNA binding	6	0.310238	0.0970242	MDFI, SMO, ZFP462, FOXJ1, HMOX1, FLNA	1363	26	14219	2.40742	1	0.604711	84.4692
GOTERM_BP_ALL	GO:0007243~protein kinase cascade	30	1.55119	0.0972943	FGFR3, FGF14, THOP1, EDN1, GNA12, FGF13, LATS2, CD74, SPRED2, TGFA, SPRED3, SPRED1, NRG1, ZFP36, CNKSR2, MDFI, RET, SOCS1, MAPK11, DAPK3, SHANK3, DAPK1, RPS6KA6, PLCE1, NRK, MAPK8IP1, NRGN, DUSP9, TRIP6, F2R	1363	236	14219	1.32612	1	0.6048	84.5538
GOTERM_BP_ALL	GO:0051240~positive regulation of multicellular organismal process	22	1.13754	0.0988512	FGFR2, BMP4, GM98, ADORA2B, EDN1, TLR2, CD276, NCS1, TLR3, CX3CL1, TPM1, H2-Q7, ADA, RAET1B, RAET1A, SLC1A3, CHD7, BCL2, GATA3, TBXA2R, CHRNA7, LTB, F2R	1363	163	14219	1.40802	1	0.609956	85.0327
GOTERM_BP_ALL	GO:0060537~muscle tissue development	19	0.98242	0.0988766	CAV2, SMAD7, PDLIM3, RXRG, HSPG2, EGLN1, MYH6, PTEN, CACNA1S, FLNB, ITGB1, TPM1, TGFB1, MYL6B, ZFPM2, NRG1, COL11A1, F2R, MYH10	1363	136	14219	1.45743	1	0.609075	85.0404
GOTERM_BP_ALL	GO:0033043~regulation of organelle organization	21	1.08583	0.0990465	TRP53, LOC100047211, MTAP2, MID1, NEXN, TGFB1, ESPN, PFN1, CORO1A, YWHAH, CUL7, MTAP1A, SPNB2, SPNB1, CFL1, SCIN, MTAP1B, CAPG, SPNA1, TGFA, LTB	1363	154	14219	1.42256	1	0.608761	85.0918
GOTERM_BP_ALL	GO:0010035~response to inorganic substance	14	0.723888	0.0993075	KCNMB4, PXDN, S100A16, GATM, CYP11A1, GRIA3, SLC1A3, ABCB1B, PRDX6, LCAT, BCL2, GPX3, CACNA1G, MT4	1363	92	14219	1.5875	1	0.608804	85.1704

## Sheet: CODEX
TF Symbol	Regulated pluripotency network gene
	Nanog	Oct4	Sox2
AFF4	ü	ü	ü
BRG	ü	ü
CHD7	ü	ü
CTCF	ü	ü	ü
DPY30	ü	ü
E2F1	ü	ü	ü
ELL2	ü	ü	ü
ESET	ü
ESRRB	ü	ü	ü
EZH2
KLF4	ü	ü	ü
MCAF1
MED1	ü	ü	ü
MED12	ü	ü	ü
MYCN		ü
NANOG	ü	ü	ü
NELFA	ü	ü
NIPBL	ü	ü	ü
OCT4	ü	ü	ü
P300	ü	ü	ü
PRDM14	ü	ü	ü
RAD21	ü	ü	ü
RBBP5
REST	ü
RING1B		ü
SIN3A	ü	ü	ü
SMC1	ü	ü
SMC3	ü
SOX2	ü	ü	ü
SPT5
STAT3	ü	ü
SUZ12
TBP	ü	ü	ü
TCF3	ü	ü	ü
TCFCP2L1	ü	ü	ü
TET1	ü	ü	ü
TET1C	ü	ü	ü
TET1N		ü
WDR5
ZFX	ü	ü	ü

## Sheet: 2i>Serum
Category	Term	Count	%	PValue	Genes	List Total	Pop Hits	Pop Total	Fold Enrichment	Bonferroni	Benjamini	FDR		Acts on core network		Category	Category Key
GOTERM_BP_ALL	GO:0005975~carbohydrate metabolic process	63	0.480586	1.83606e-08	GNPTG, LDHB, SEC1, GBGT1, HEXA, HEXB, OGDHL, PPIP5K1, CAR5A, ALG6, GPAT2, ITPKA, GLB1, SLC2A8, ST6GALNAC6, ST3GAL3, GLT25D2, MAN2B2, 3000002C10RIK, ST3GAL4, TRAK1, B3GALNT2, OGT, IP6K1, B3GALTL, IDUA, HYAL1, AMY1, LDHAL6B, PHKG1, PFKM, RENBP, SLC37A2, CHST8, GLB1L2, UGGT2, PHKA2, LOC100047396, ALDOC, HK1, SHPK, NAGK, HEXDC, G6PC3, UEVLD, PPP1R3B, NAGA, ENO2, GALC, IDH2, RPIA, FUT2, AI464131, GLT2…	925	454	14219	2.1331	5.45844e-05	5.45844e-05	3.30281e-05		*		0	N/A	0
GOTERM_BP_ALL	GO:0044262~cellular carbohydrate metabolic process	47	0.358532	5.56918e-07	PHKA2, GNPTG, LDHB, SEC1, ALDOC, OGDHL, PPIP5K1, HK1, ALG6, CAR5A, NAGK, GPAT2, ITPKA, G6PC3, SLC2A8, ST6GALNAC6, UEVLD, ST3GAL3, GLT25D2, MAN2B2, PPP1R3B, 3000002C10RIK, ST3GAL4, B3GALNT2, TRAK1, ENO2, IDH2, FUT2, RPIA, OGT, IP6K1, B3GALTL, GLT25D1, ST6GAL2, GM8615, LDHAL6B, PHKG1, GALT, PFKM, FUCA2, CPT1A, GAPDHS, AMDHD2, ATF4, RENBP, SLC37A2, UGGT2	925	327	14219	2.20942	0.00165435	0.000827517	0.00100181		*		0	Development and differentiaition	1
GOTERM_BP_ALL	GO:0006066~alcohol metabolic process	50	0.381417	6.47614e-07	LDHB, HNF1A, CYB5R2, HPRT, OGDHL, SORL1, PPIP5K1, CAR5A, GPAT2, ITPKA, SLC2A8, MAN2B2, 3000002C10RIK, APOE, B3GALNT2, INSIG1, CAT, IP6K1, B3GALTL, LDHAL6B, PHKG1, PFKM, PNPLA7, RENBP, SLC37A2, PHKA2, CHKB, ALDOC, APOC1, HK1, NAGK, G6PC3, UEVLD, PPP1R3B, LY6E, ADH1, ENO2, SCARB1, RPIA, ST6GAL2, GM8615, GALT, NPR1, FUCA2, CPT1A, GAPDHS, AMDHD2, ATF4, FABP3, LIPC	925	360	14219	2.13498	0.0019235	0.00064158	0.00116496		*		0	Pluripotency	2
GOTERM_BP_ALL	GO:0044255~cellular lipid metabolic process	60	0.457701	1.76474e-06	SLC27A1, HNF1A, ALOXE3, GBGT1, EHHADH, STAT5A, HEXA, HEXB, PIP5K1B, ECHDC2, GPAT2, ACSF2, ACOX3, GPX1, ST6GALNAC6, GLT25D2, SMPDL3A, INSIG1, ELOVL7, CAT, IP6K1, HADH, CLN3, ACADS, PIGYL, TAZ, PIGP, PNPLA3, PNPLA7, NAPEPLD, PLA2G2C, PLA2G5, HACL1, ECH1, CHKB, APOC1, ACSBG2, KIT, ALDH1A2, CEPT1, ADH1, ALDH1A3, GALC, CERK, PPAP2B, SCD1, GLT25D1, PSAP, EPHX2, CRAT, PHYH, FADS6, CPT1A, MLYCD, FABP3, P…	925	482	14219	1.91351	0.00523283	0.00131078	0.00317447		*		0	Proliferation and cell cycle	3
GOTERM_BP_ALL	GO:0044242~cellular lipid catabolic process	16	0.122054	1.8182e-06	HACL1, NAPEPLD, SMPDL3A, HEXA, EHHADH, HEXB, ACSBG2, GALC, PLA2G4F, PLA2G2C, LIPC, PNPLA3, PHYH, PLA2G4B, PLA2G4E, ACOX3	925	56	14219	4.39197	0.00539092	0.00108052	0.00327063		*		0	morphology	4
GOTERM_BP_ALL	GO:0008152~metabolic process	522	3.982	5.91637e-06	FHIT, LDHB, GBGT1, MASP2, EHHADH, PGC, BC016495, LDHD, MYLIP, CLK1, CTTNBP2, MAMSTR, PGPEP1, MAP3K8, RPL11, OGT, SDR9C7, LUC7L3, C4A, CYP1A1, RCOR3, ZSCAN4E, ZSCAN4C, NAPEPLD, F2, RPS15, MST1R, HACL1, ACSBG2, MST1, ACP5, TRPT1, NAGK, PPCDC, ATP6V0B, ZSCAN5B, HESX1, RPS27, PPP1R3B, NAGA, FAHD2A, CML1, PTGR1, RPS8, GCFC1, DMRTC2, MLYCD, HEBP1, SGSH, HNF1B, HNF1A, HTATIP2, KCNAB2, ELF4, EZH1, AOX3L1…	925	7020	14219	1.14304	0.0174356	0.00292728	0.0106422		*		0	cell death	5
GOTERM_BP_ALL	GO:0006629~lipid metabolic process	74	0.564498	3.01867e-05	SLC27A1, CYB5R2, HNF1A, ALOXE3, GBGT1, EHHADH, STAT5A, HEXA, HEXB, SORL1, PIP5K1B, SULT2B1, ECHDC2, GPAT2, ACSF2, ASAH1, ACOX3, GPX1, ST6GALNAC6, GLT25D2, APOE, SMPDL3A, STARD6, INSIG1, PLA1A, ELOVL7, CAT, IP6K1, HADH, CLN3, ACADS, PIGYL, TAZ, LPIN1, PIGP, PNPLA3, PNPLA7, NAPEPLD, PLA2G2C, PLA2G5, HACL1, ECH1, HSD3B7, CHKB, APOC1, ACSBG2, KIT, ALDH1A2, CEPT1, ADH1, ALDH1A3, GALC, SCARB1, CERK, PP…	925	696	14219	1.63437	0.0858371	0.0127391	0.0542878		*		0
GOTERM_BP_ALL	GO:0005996~monosaccharide metabolic process	29	0.221222	4.27546e-05	PHKA2, LDHB, ALDOC, OGDHL, HK1, CAR5A, NAGK, G6PC3, SLC2A8, UEVLD, PPP1R3B, MAN2B2, 3000002C10RIK, B3GALNT2, ENO2, RPIA, B3GALTL, ST6GAL2, LDHAL6B, GM8615, PHKG1, GALT, PFKM, FUCA2, CPT1A, GAPDHS, AMDHD2, RENBP, ATF4	925	191	14219	2.33395	0.119365	0.0157634	0.0768815		*		0
GOTERM_BP_ALL	GO:0002526~acute inflammatory response	17	0.129682	5.46208e-05	MBL2, C4A, MASP2, EPHX2, SAA3, C1S, SIGIRR, FCGR3, C8G, AHSG, C8B, GM5077, CD55, NUPR1, F2, CFH, FN1	925	81	14219	3.2262	0.149892	0.0178817	0.0982095		*		0
GOTERM_BP_ALL	GO:0065008~regulation of biological quality	106	0.808605	7.41908e-05	SLC9A8, GNA15, STAT5A, CAPZA1, KANK1, CTTNBP2, S1PR1, CDKN2A, APOE, GRIN2C, AQP11, EIF2B5, IDUA, SLC12A7, MYO6, DDIT3, SSTR5, NPC2, F2, VAMP2, LST1, MST1, ACP5, IFI30, SFPI1, AHSG, TIMP1, SLC11A1, ADRB3, ECE2, CDC42EP2, DMD, SCARB1, ENTPD2, SRGN, FN1, TESC, EPHX2, LIN7B, TNNI3, NTRK3, P2RX4, EI24, RNF6, TXNDC16, ULK1, AVPR1B, SCARA5, HNF1B, LIMA1, HNF1A, HEXA, FAM3B, HEXB, PDIA5, SYNGR1, CKB, MBP…	925	1123	14219	1.45095	0.197944	0.0218162	0.133375		PRDM14		0
GOTERM_BP_ALL	GO:0009987~cellular process	655	4.99657	7.96683e-05	FHIT, LDHB, SLC9A8, GBGT1, EHHADH, LDHD, BC016495, MYLIP, RADIL, CLK1, CTTNBP2, MAMSTR, GRIN2C, AQP11, MAP3K8, STAG3, RPL11, OGT, CCNA1, D230025D16RIK, LUC7L3, SH3GL3, CYP1A1, RCOR3, ZSCAN4E, KIF5A, ZSCAN4C, SIRPA, NAPEPLD, UNC13D, NPC2, TIMM8A2, F2, RPS15, MST1R, SLC30A10, SH3GL2, HACL1, ACSBG2, ACP5, TRPT1, NAGK, PPCDC, ATP6V0B, ZSCAN5B, HESX1, ADRB3, RPS27, PPP1R3B, RAC2, SPP1, TNNI3, PCDH19, …	925	9252	14219	1.08826	0.210901	0.0213028	0.143215		PRDM14		1
GOTERM_BP_ALL	GO:0016042~lipid catabolic process	22	0.167824	0.000145423	HACL1, HEXA, EHHADH, HEXB, ACSBG2, PNPLA3, PHYH, ACOX3, PNPLA7, NAPEPLD, SMPDL3A, APOE, GALC, PLA1A, PLA2G4F, LIPH, PLA2G2C, SCARB1, LIPC, PLA2G4B, PLA2G4E, PLA2G5	925	134	14219	2.52374	0.351032	0.0353897	0.261272		*		0
GOTERM_BP_ALL	GO:0019318~hexose metabolic process	25	0.190709	0.000241119	PHKA2, LDHB, ALDOC, OGDHL, HK1, CAR5A, G6PC3, SLC2A8, UEVLD, MAN2B2, PPP1R3B, 3000002C10RIK, ENO2, RPIA, B3GALTL, GM8615, LDHAL6B, PHKG1, GALT, PFKM, FUCA2, CPT1A, GAPDHS, RENBP, ATF4	925	169	14219	2.27395	0.511752	0.0536555	0.432852		*		0
GOTERM_BP_ALL	GO:0055114~oxidation reduction	67	0.511099	0.000475887	LDHB, STEAP4, CYB5R2, HTATIP2, ALDH1L1, KCNAB2, ALOXE3, EHHADH, LDHD, AOX3L1, PPOX, CYP2B23, CYP4F39, ACOX3, BC026585, GPX2, GPX1, UQCR10, CAT, HADH, NQO1, SDR9C7, KDM5D, ALDH6A1, CYP1A1, LDHAL6B, ACADS, CYCT, NDUFA13, CBR3, CDO1, DDO, VAT1, SCCPDH, SLC37A2, ZADH2, NDUFB4, PHYHD1, BC002163, ADHFE1, HSD3B7, MOSC2, RSAD1, RRM2B, ALDH3A2, ALDH1A2, UEVLD, ADH1, ALDH1A3, IDH2, DMGDH, SCD1, PTGR1, NDUF…	925	672	14219	1.53261	0.75711	0.0961411	0.852602		*		0
GOTERM_BP_ALL	GO:0045087~innate immune response	18	0.13731	0.000514408	IRAK1, MBL2, C4A, MASP2, NLRX1, MALT1, C1S, SIGIRR, C8G, SLC11A1, C8B, CD55, TMEM173, GM5077, NOD2, SARM1, UNC13D, CFH	925	107	14219	2.58593	0.783406	0.0969541	0.921316		*		0
GOTERM_BP_ALL	GO:0051605~protein maturation by peptide bond cleavage	13	0.0991685	0.000865814	C8B, MBL2, CD55, GM5077, ECE2, C4A, MASP2, CHST8, PSEN2, CFH, C1S, SRGN, C8G	925	65	14219	3.07438	0.92386	0.148664	1.54608		*		0
GOTERM_BP_ALL	GO:0051604~protein maturation	16	0.122054	0.00128019	AGA, MBL2, CLN3, C4A, MASP2, C1S, C8G, C8B, IMMP2L, CD55, ECE2, GM5077, PSEN2, CHST8, CFH, SRGN	925	96	14219	2.56198	0.977817	0.200705	2.278		*		0
GOTERM_BP_ALL	GO:0051234~establishment of localization	188	1.43413	0.00144299	GNPTG, SLC9A8, GM5134, SEC31B, KCNC4, ATP1B1, RFT1, SLC22A18, SLC7A9, FGF10, SLC26A11, AQP3, SLC2A8, KCNU1, CTTNBP2, SLC2A7, UQCR10, APOD, APOE, AQP11, GRIN2C, STARD6, TRAK1, RAB24, MCOLN1, D230025D16RIK, F630110N24RIK, SLC4A5, SLC12A6, SH3GL3, SLC12A7, SLC12A8, MYO6, CD3G, RINT1, ABCC10, TCN2, SIRPA, SLC34A3, PKD2L1, NPC2, RPAIN, UNC13D, SLC25A34, TIMM8A2, CATSPER2, SLC25A36, SLC37A2, RAB17, VAM…	925	2358	14219	1.22558	0.986338	0.212196	2.56417		*		0
GOTERM_BP_ALL	GO:0006810~transport	187	1.4265	0.00146861	GNPTG, SLC9A8, GM5134, SEC31B, KCNC4, ATP1B1, RFT1, SLC22A18, SLC7A9, FGF10, SLC26A11, AQP3, SLC2A8, KCNU1, CTTNBP2, SLC2A7, UQCR10, APOD, APOE, AQP11, GRIN2C, STARD6, TRAK1, RAB24, MCOLN1, D230025D16RIK, F630110N24RIK, SLC4A5, SLC12A6, SH3GL3, SLC12A7, SLC12A8, MYO6, CD3G, RINT1, ABCC10, TCN2, SIRPA, SLC34A3, PKD2L1, NPC2, RPAIN, UNC13D, SLC25A34, TIMM8A2, CATSPER2, SLC25A36, SLC37A2, RAB17, VAM…	925	2342	14219	1.22739	0.987341	0.20544	2.60912		*		0
GOTERM_BP_ALL	GO:0048518~positive regulation of biological process	126	0.961172	0.00156968	CDX1, MASP2, PDGFA, STAT5A, FGF10, PTPN22, CTTNBP2, S1PR1, CDKN2A, APOE, MDFIC, GATA4, CFH, EIF2B5, C4A, SIRPA, DDIT3, PPARGC1B, HOXD9, HES1, CD38, CD37, UNC13D, PIAS3, NFE2L2, LST1, RAG1AP1, SFPI1, RRM2B, AHSG, PLAGL1, SLC11A1, ADRB3, AHRR, RAC2, TEAD4, SCARB1, SPP1, TESC, CARD9, KLB, MAML2, ROGDI, MALT1, CD63, FCGR3, TRADD, NTRK3, POLD4, ATF4, CD55, CDKN1A, EI24, RNF6, GM5077, BMP7, BMI1, SLC27…	925	1493	14219	1.29729	0.990631	0.208255	2.78629		*		0
GOTERM_BP_ALL	GO:0000041~transition metal ion transport	13	0.0991685	0.00169695	STEAP4, FTL1, SLC39A11, SLC39A13, SFXN3, SFXN4, SFXN2, TCN2, SLC11A1, SLC39A4, SLC30A10, SCARA5, SLC31A1	925	70	14219	2.85478	0.993586	0.213721	3.00898		*		0
GOTERM_BP_ALL	GO:0051453~regulation of intracellular pH	5	0.0381417	0.00171407	SLC9A8, CLN3, SLC11A1, AQP11, CLN5	925	9	14219	8.53994	0.993905	0.20692	3.03888		*		0
GOTERM_BP_ALL	GO:0006956~complement activation	9	0.0686551	0.00182442	MBL2, C8B, GM5077, CD55, C4A, MASP2, CFH, C1S, C8G	925	36	14219	3.84297	0.995612	0.210252	3.2315		*		0
GOTERM_BP_ALL	GO:0002541~activation of plasma proteins involved in acute inflammatory response	9	0.0686551	0.00182442	MBL2, C8B, GM5077, CD55, C4A, MASP2, CFH, C1S, C8G	925	36	14219	3.84297	0.995612	0.210252	3.2315		*		0
GOTERM_BP_ALL	GO:0002684~positive regulation of immune system process	26	0.198337	0.0018839	BMI1, MBL2, MASP2, STAT5A, PTPN22, C1S, TNFRSF4, SLC11A1, NOD2, CFH, IL2RG, INPP5D, CD27, IRAK1, CARD9, C4A, MALT1, C8G, FCGR3, CD38, C8B, GM5077, CDKN1A, CD37, CD55, PSEN2	925	206	14219	1.94014	0.996325	0.208313	3.33519		*		0
GOTERM_BP_ALL	GO:0051179~localization	208	1.5867	0.00188473	SLC9A8, SEC31B, ATP1B1, RFT1, STAT5A, SLC26A11, AQP3, CTTNBP2, APOD, AQP11, GRIN2C, APOE, TRAK1, RAB24, D230025D16RIK, SH3GL3, SLC12A6, SLC12A7, SLC12A8, CD3G, RINT1, ABCC10, OPTN, SIRPA, NPC2, UNC13D, TIMM8A2, CATSPER2, RAB17, RAB12, SLC30A10, MYH7B, SH3GL2, CLCN1, BC002163, TNRC18, SFXN3, SFXN4, SFXN2, ATP6V0B, SLC11A1, SLC31A1, PLTP, HAP1, SLC28A3, OSBPL6, OSBPL7, RAB7L1, FCGR3, SYNE1, SYNE2, …	925	2659	14219	1.20246	0.996334	0.20096	3.33663		*		0
GOTERM_BP_ALL	GO:0002682~regulation of immune system process	36	0.27462	0.0019144	BMI1, MBL2, LST1, MASP2, STAT5A, MITF, PTPN22, C1S, ZEB1, PRDM16, TNFRSF4, GPX2, SLC11A1, GPX1, NOD2, CDKN2A, CFH, IL2RG, INPP5D, CD27, IRAK1, TESC, CARD9, C4A, MALT1, FCGR3, C8G, CD38, C8B, CD55, CDKN1A, GM5077, CD37, H2-OA, CD59B, PSEN2	925	322	14219	1.7186	0.996644	0.19677	3.38831		*		0
GOTERM_BP_ALL	GO:0016485~protein processing	15	0.114425	0.00191485	MBL2, CLN3, C4A, MASP2, C1S, C8G, IMMP2L, C8B, CD55, ECE2, GM5077, PSEN2, CHST8, CFH, SRGN	925	90	14219	2.56198	0.996648	0.190265	3.3891		*		0
GOTERM_BP_ALL	GO:0051188~cofactor biosynthetic process	15	0.114425	0.00213096	MOCOS, HNF1A, BC016495, NADSYN1, MTHFSD, RSAD1, PPOX, GGT1, PPCDC, MMAB, GSS, ACSS1, ISCA2, MLYCD, MYH7B	925	91	14219	2.53383	0.998239	0.202683	3.76469		*		0
GOTERM_BP_ALL	GO:0048584~positive regulation of response to stimulus	24	0.18308	0.00220078	IRAK1, MBL2, CARD9, C4A, MASP2, STAT5A, FGF10, PTPN22, MALT1, C1S, FCGR3, C8G, NTRK3, C8B, SLC11A1, CD55, NOD2, EYA1, GM5077, CDKN2A, S1PR1, PSEN2, CFH, CD27	925	186	14219	1.98347	0.99857	0.202175	3.88575		*		0
GOTERM_BP_ALL	GO:0046365~monosaccharide catabolic process	11	0.0839118	0.00223399	GAPDHS, LDHB, UEVLD, LDHAL6B, GM8615, ALDOC, OGDHL, ENO2, HK1, PFKM, RPIA	925	54	14219	3.13131	0.998705	0.198793	3.94328		*		0
GOTERM_BP_ALL	GO:0006959~humoral immune response	11	0.0839118	0.00223399	TRAF3IP2, BMI1, MBL2, C8B, GM5077, CD55, C4A, MASP2, CFH, C1S, C8G	925	54	14219	3.13131	0.998705	0.198793	3.94328		*		0
GOTERM_BP_ALL	GO:0032787~monocarboxylic acid metabolic process	31	0.236479	0.00247914	HACL1, SLC27A1, ALDH1L1, ECH1, HNF1A, ALOXE3, STAT5A, EHHADH, ACSBG2, ECHDC2, CAR5A, ACSF2, G6PC3, ACOX3, ALDH1A2, ADH1, ALDH1A3, IDH2, ELOVL7, HADH, SCD1, ACADS, EPHX2, MTHFSD, CRAT, PHYH, FADS6, CPT1A, ATF4, MLYCD, LIPC	925	268	14219	1.77809	0.999376	0.211839	4.36695		*		0
GOTERM_BP_ALL	GO:0048522~positive regulation of cellular process	112	0.854375	0.00258832	CDX1, PDGFA, STAT5A, FGF10, CTTNBP2, S1PR1, CDKN2A, APOE, MDFIC, GATA4, EIF2B5, SIRPA, DDIT3, PPARGC1B, HOXD9, HES1, CD38, UNC13D, PIAS3, NFE2L2, LST1, SFPI1, RRM2B, AHSG, PLAGL1, SLC11A1, ADRB3, AHRR, RAC2, TEAD4, SPP1, TESC, CARD9, KLB, MAML2, ROGDI, MALT1, CD63, FCGR3, TRADD, NTRK3, POLD4, ATF4, RNF6, EI24, CDKN1A, BMP7, BMI1, HNF1B, HTATIP2, HNF1A, HPRT, ELF4, MITF, ZEB1, RFXANK, ZBTB38, GPX1…	925	1320	14219	1.30428	0.999549	0.213988	4.55506		*		0
GOTERM_BP_ALL	GO:0006958~complement activation, classical pathway	8	0.0610268	0.00259976	MBL2, C8B, GM5077, CD55, C4A, MASP2, C1S, C8G	925	30	14219	4.09917	0.999565	0.20905	4.57475		*		0
GOTERM_BP_ALL	GO:0002250~adaptive immune response	14	0.106797	0.00286863	C8B, MBL2, SLC11A1, CD55, NOD2, GM5077, UNC13D, C4A, MASP2, RELB, INPP5D, C1S, FCGR3, C8G	925	84	14219	2.56198	0.999805	0.222131	5.03643		*		0
GOTERM_BP_ALL	GO:0002460~adaptive immune response based on somatic recombination of immune receptors built from immunoglobulin superfamily domains	14	0.106797	0.00286863	C8B, MBL2, SLC11A1, CD55, NOD2, GM5077, UNC13D, C4A, MASP2, RELB, INPP5D, C1S, FCGR3, C8G	925	84	14219	2.56198	0.999805	0.222131	5.03643		*		0
GOTERM_BP_ALL	GO:0046164~alcohol catabolic process	12	0.0915402	0.00289723	GAPDHS, LDHB, UEVLD, LDHAL6B, GM8615, ADH1, ALDOC, OGDHL, ENO2, HK1, PFKM, RPIA	925	65	14219	2.83789	0.999821	0.218434	5.08541		*		0
GOTERM_BP_ALL	GO:0009056~catabolic process	91	0.69418	0.00290185	LDHB, ALDH1L1, HEXA, AMT, EHHADH, HEXB, OGDHL, TRIM50, CBX4, MYLIP, RNF181, ACOX3, AUH, GPX1, GSTM4, ZYG11A, MGRN1, APOE, TPP1, SMPDL3A, GM4902, RAB24, PLA1A, FBXL12, PDE8B, PDE8A, CAT, SUCLA2, CLN3, LDHAL6B, HAL, GM6907, PFKM, CDO1, CDK5, UBE2B, PNPLA3, DNASE2A, PNPLA7, ASB8, NAALAD2, NAPEPLD, PIAS3, FBXL8, PSEN2, UBC, DDB2, UBD, FBXL4, PLA2G2C, NEURL2, PLA2G5, ZER1, UBE2T, FBXL2, HACL1, LOC1000…	925	1040	14219	1.34504	0.999823	0.213367	5.09333		*		0
GOTERM_BP_ALL	GO:0043436~oxoacid metabolic process	48	0.366161	0.00303157	HACL1, SLC27A1, HNF1A, ECH1, ALDH1L1, ALOXE3, AMT, STAT5A, EHHADH, GOT1L1, ACSBG2, ECHDC2, ASNS, CAR5A, ACSF2, G6PC3, AUH, ACOX3, ALDH1A2, ADH1, ALDH1A3, IDH2, DMGDH, ELOVL7, HADH, SCD1, CLN3, ALDH6A1, BHMT2, ST6GAL2, ACY1, ACADS, EPHX2, HAL, IDO2, MTHFSD, CRAT, PADI4, CDO1, PHYH, FADS6, DDO, PADI1, CPT1A, ATF4, MLYCD, LIPC, ADC	925	479	14219	1.5404	0.99988	0.216482	5.31519		*		0
GOTERM_BP_ALL	GO:0019752~carboxylic acid metabolic process	48	0.366161	0.00303157	HACL1, SLC27A1, HNF1A, ECH1, ALDH1L1, ALOXE3, AMT, STAT5A, EHHADH, GOT1L1, ACSBG2, ECHDC2, ASNS, CAR5A, ACSF2, G6PC3, AUH, ACOX3, ALDH1A2, ADH1, ALDH1A3, IDH2, DMGDH, ELOVL7, HADH, SCD1, CLN3, ALDH6A1, BHMT2, ST6GAL2, ACY1, ACADS, EPHX2, HAL, IDO2, MTHFSD, CRAT, PADI4, CDO1, PHYH, FADS6, DDO, PADI1, CPT1A, ATF4, MLYCD, LIPC, ADC	925	479	14219	1.5404	0.99988	0.216482	5.31519		*		0
GOTERM_BP_ALL	GO:0050776~regulation of immune response	24	0.18308	0.00309613	IRAK1, MBL2, CARD9, C4A, MASP2, STAT5A, PTPN22, MALT1, C1S, TNFRSF4, FCGR3, C8G, GPX2, C8B, GPX1, SLC11A1, CD55, NOD2, GM5077, CD37, CD59B, PSEN2, CFH, INPP5D	925	191	14219	1.93155	0.999901	0.21542	5.42541		*		0
GOTERM_BP_ALL	GO:0006082~organic acid metabolic process	48	0.366161	0.00313941	HACL1, SLC27A1, HNF1A, ECH1, ALDH1L1, ALOXE3, AMT, STAT5A, EHHADH, GOT1L1, ACSBG2, ECHDC2, ASNS, CAR5A, ACSF2, G6PC3, AUH, ACOX3, ALDH1A2, ADH1, ALDH1A3, IDH2, DMGDH, ELOVL7, HADH, SCD1, CLN3, ALDH6A1, BHMT2, ST6GAL2, ACY1, ACADS, EPHX2, HAL, IDO2, MTHFSD, CRAT, PADI4, CDO1, PHYH, FADS6, DDO, PADI1, CPT1A, ATF4, MLYCD, LIPC, ADC	925	480	14219	1.53719	0.999913	0.213133	5.49925		*		0
GOTERM_BP_ALL	GO:0002449~lymphocyte mediated immunity	13	0.0991685	0.00346284	C8B, MBL2, SLC11A1, CD55, NOD2, GM5077, UNC13D, C4A, MASP2, INPP5D, C1S, FCGR3, C8G	925	76	14219	2.6294	0.999967	0.227267	6.04928		*		0
GOTERM_BP_ALL	GO:0002253~activation of immune response	14	0.106797	0.00354048	IRAK1, MBL2, C4A, MASP2, PTPN22, MALT1, C1S, C8G, C8B, GM5077, NOD2, CD55, PSEN2, CFH	925	86	14219	2.5024	0.999974	0.226774	6.18085		*		0
GOTERM_BP_ALL	GO:0006955~immune response	47	0.358532	0.00364476	BMI1, MBL2, LST1, LOC100047396, MASP2, SUSD2, H2-D1, NLRX1, ACP5, C1S, OAS2, SLC11A1, NOD2, TMEM173, OASL1, CFH, INPP5D, CD27, CD7, IRAK1, CARD9, C4A, LY96, RELB, CD300E, H2-AB1, MALT1, ZFR2, FCGR3, SIGIRR, C8G, TRAF3IP2, OSM, C8B, CD55, GM5077, UNC13D, SARM1, H2-OA, H2-EB1, PSEN2, OAS1B, CD300LF, OAS1A, H2-T24, OAS1G, H2-T3	925	471	14219	1.53393	0.999981	0.227766	6.35732		*		0
GOTERM_BP_ALL	GO:0030004~cellular monovalent inorganic cation homeostasis	6	0.0457701	0.00367439	SLC9A8, CLN3, SLC11A1, TESC, AQP11, CLN5	925	17	14219	5.42537	0.999982	0.224707	6.4074		*		0
GOTERM_BP_ALL	GO:0009395~phospholipid catabolic process	6	0.0457701	0.00367439	NAPEPLD, SMPDL3A, PLA2G4F, PLA2G2C, PLA2G4B, PLA2G4E	925	17	14219	5.42537	0.999982	0.224707	6.4074		*		0
GOTERM_BP_ALL	GO:0010876~lipid localization	18	0.13731	0.00380008	SLC27A1, ABCA7, RFT1, HNF1A, TNRC18, OSBPL6, STAT5A, HEXA, OSBPL7, SORL1, HEXB, APOC1, NPC2, APOE, STARD6, SCARB1, LIPC, PLTP	925	128	14219	2.16167	0.999988	0.226828	6.61956		*		0
GOTERM_BP_ALL	GO:0006006~glucose metabolic process	19	0.144939	0.00419309	PHKA2, LDHB, LDHAL6B, PHKG1, ALDOC, OGDHL, HK1, CAR5A, PFKM, G6PC3, CPT1A, GAPDHS, SLC2A8, ATF4, UEVLD, PPP1R3B, 3000002C10RIK, ENO2, RPIA	925	140	14219	2.08619	0.999996	0.242405	7.28004		*		0
GOTERM_BP_ALL	GO:0050764~regulation of phagocytosis	7	0.0533984	0.00450679	MBL2, SLC11A1, NOD2, SCARB1, SIRPA, AHSG, FCGR3	925	25	14219	4.30413	0.999999	0.253182	7.80406		*		0
GOTERM_BP_ALL	GO:0006644~phospholipid metabolic process	21	0.160195	0.00451556	CLN3, CHKB, PIGYL, HEXB, TAZ, PIP5K1B, GPAT2, PIGP, PNPLA7, CEPT1, NAPEPLD, SMPDL3A, FABP3, PLA2G4F, PLA2G2C, LIPC, IP6K1, PPAP2B, PLA2G4B, PLA2G4E, PLA2G5	925	163	14219	1.98043	0.999999	0.248948	7.81868		*		0
GOTERM_BP_ALL	GO:0042180~cellular ketone metabolic process	48	0.366161	0.00487333	HACL1, SLC27A1, HNF1A, ECH1, ALDH1L1, ALOXE3, AMT, STAT5A, EHHADH, GOT1L1, ACSBG2, ECHDC2, ASNS, CAR5A, ACSF2, G6PC3, AUH, ACOX3, ALDH1A2, ADH1, ALDH1A3, IDH2, DMGDH, ELOVL7, HADH, SCD1, CLN3, ALDH6A1, BHMT2, ST6GAL2, ACY1, ACADS, EPHX2, HAL, IDO2, MTHFSD, CRAT, PADI4, CDO1, PHYH, FADS6, DDO, PADI1, CPT1A, ATF4, MLYCD, LIPC, ADC	925	491	14219	1.50275	1	0.261091	8.41281		*		0
GOTERM_BP_ALL	GO:0044275~cellular carbohydrate catabolic process	11	0.0839118	0.00495199	GAPDHS, LDHB, UEVLD, LDHAL6B, GM8615, ALDOC, OGDHL, ENO2, HK1, PFKM, RPIA	925	60	14219	2.81818	1	0.260071	8.54295		*		0
GOTERM_BP_ALL	GO:0019637~organophosphate metabolic process	22	0.167824	0.0050933	CLN3, CHKB, PIGYL, HEXB, TAZ, PIP5K1B, GPAT2, PIGP, PNPLA7, CEPT1, NAPEPLD, SMPDL3A, SLC37A2, FABP3, PLA2G4F, PLA2G2C, LIPC, IP6K1, PPAP2B, PLA2G4B, PLA2G4E, PLA2G5	925	176	14219	1.92149	1	0.26186	8.7763		*		0
GOTERM_BP_ALL	GO:0009266~response to temperature stimulus	10	0.0762835	0.00511015	OSM, ADRB3, SLC27A1, ACCN3, HSPB8, RBM3, MYOF, SCARA5, EIF2B5, 2310046K01RIK	925	51	14219	3.0141	1	0.258185	8.80409		*		0
GOTERM_BP_ALL	GO:0048583~regulation of response to stimulus	35	0.266992	0.00517874	MBL2, MASP2, STAT5A, FGF10, PTPN22, C1S, TNFRSF4, AHSG, GPX2, SLC11A1, GPX1, NOD2, CDKN2A, S1PR1, MDFIC, CFH, INPP5D, CD27, RTEL1, IRAK1, CLN3, CARD9, C4A, MALT1, FCGR3, C8G, NTRK3, C8B, CD55, EYA1, GM5077, CD37, TEX15, CD59B, PSEN2	925	330	14219	1.63035	1	0.256848	8.91713		*		0
GOTERM_BP_ALL	GO:0042592~homeostatic process	55	0.419559	0.0054128	SLC9A8, GNA15, HNF1A, STAT5A, HEXA, HEXB, PDIA5, MBP, CKB, GPX2, GPX1, S1PR1, APOE, GRIN2C, AQP11, TPP1, MT2, MT1, RTEL1, IDUA, EIF2B5, SLC12A7, CLN3, PFKM, CDK5, DNASE2A, DDIT3, SSTR5, NPC2, KLHL10, CLN5, FTL1, ACP5, SFPI1, TRIM10, TIMP1, ADRB3, SLC11A1, MTM1, CD9, PRDM14, INPP5K, DMD, SCARB1, SLC39A4, HRC, CD7, TESC, TNNI3, P2RX4, TEX15, TXNDC16, LIPC, 2700094K13RIK, SCARA5	925	584	14219	1.4477	1	0.262473	9.30184		PRDM14		0
GOTERM_BP_ALL	GO:0045807~positive regulation of endocytosis	8	0.0610268	0.00547745	MBL2, SLC11A1, NOD2, FGF10, CD63, SIRPA, AHSG, FCGR3	925	34	14219	3.61692	1	0.260952	9.40784		*		0
GOTERM_BP_ALL	GO:0030641~regulation of cellular pH	5	0.0381417	0.00575401	SLC9A8, CLN3, SLC11A1, AQP11, CLN5	925	12	14219	6.40495	1	0.267966	9.85994		*		0
GOTERM_BP_ALL	GO:0030100~regulation of endocytosis	10	0.0762835	0.00583206	MBL2, SLC11A1, NOD2, FGF10, SCARB1, CD63, SIRPA, AHSG, EPN2, FCGR3	925	52	14219	2.95613	1	0.266939	9.98715		*		0
GOTERM_BP_ALL	GO:0006007~glucose catabolic process	10	0.0762835	0.00583206	GAPDHS, LDHB, UEVLD, LDHAL6B, ALDOC, OGDHL, ENO2, HK1, PFKM, RPIA	925	52	14219	2.95613	1	0.266939	9.98715		*		0
GOTERM_BP_ALL	GO:0019320~hexose catabolic process	10	0.0762835	0.00583206	GAPDHS, LDHB, UEVLD, LDHAL6B, ALDOC, OGDHL, ENO2, HK1, PFKM, RPIA	925	52	14219	2.95613	1	0.266939	9.98715		*		0
GOTERM_BP_ALL	GO:0016052~carbohydrate catabolic process	13	0.0991685	0.0058692	LDHB, LOC100047396, GM8615, LDHAL6B, ALDOC, OGDHL, HEXB, HK1, PFKM, GAPDHS, UEVLD, ENO2, RPIA	925	81	14219	2.46709	1	0.264369	10.0476		*		0
GOTERM_BP_ALL	GO:0006040~amino sugar metabolic process	6	0.0457701	0.00619543	AMDHD2, RENBP, ST6GAL2, GM8615, B3GALNT2, NAGK	925	19	14219	4.85428	1	0.272802	10.5771		*		0
GOTERM_BP_ALL	GO:0006687~glycosphingolipid metabolic process	6	0.0457701	0.00619543	CLN3, ST6GALNAC6, HEXA, HEXB, GALC, KIT	925	19	14219	4.85428	1	0.272802	10.5771		*		0
GOTERM_BP_ALL	GO:0055085~transmembrane transport	45	0.343276	0.00636595	CLCN1, SLC9A8, SLC22A18, SLC39A11, KCNAB2, SLC39A13, SFXN3, CLCNKB, SFXN4, SLC7A9, SLC19A3, MFSD1, SFXN2, SLC26A11, ATP6V0B, AQP3, TPCN2, KCNU1, SLC2A8, SLC2A7, SCARB1, MCOLN1, 1500001M20RIK, SLC39A4, F630110N24RIK, SEC61A2, SLC12A6, TCIRG1, SLC12A7, SLC12A8, ABCC10, SLC24A6, ATP6V1H, TCN2, TRPM1, SLC17A5, CATSPER2, TIMM8A2, AU042651, SLC16A9, SLC25A36, SLC37A2, SCN8A, SLC30A10, SCARA5	925	460	14219	1.50377	1	0.27516	10.8527		*		0
GOTERM_BP_ALL	GO:0002455~humoral immune response mediated by circulating immunoglobulin	8	0.0610268	0.006471	MBL2, C8B, GM5077, CD55, C4A, MASP2, C1S, C8G	925	35	14219	3.51358	1	0.27507	11.0221		*		0
GOTERM_BP_ALL	GO:0048002~antigen processing and presentation of peptide antigen	8	0.0610268	0.006471	SLC11A1, H2-OA, H2-EB1, H2-D1, IFI30, H2-AB1, H2-T3, FCGR3	925	35	14219	3.51358	1	0.27507	11.0221		*		0
GOTERM_BP_ALL	GO:0043068~positive regulation of programmed cell death	28	0.213594	0.00650656	LST1, HTATIP2, RRM2B, GPX1, CDKN2A, CASP9, RPS3A, APOE, ALDH1A3, CASP7, PYCARD, INPP5D, CD27, LGALS12, NDUFA13, INHA, CDK5, DDIT3, FCGR3, TRADD, PLEKHF1, CDKN1A, EI24, UNC13D, NUPR1, CASP14, PSEN2, BMP7	925	250	14219	1.72165	1	0.272507	11.0794		*		5
GOTERM_BP_ALL	GO:0006096~glycolysis	9	0.0686551	0.00674973	GAPDHS, LDHB, UEVLD, LDHAL6B, ALDOC, OGDHL, ENO2, HK1, PFKM	925	44	14219	3.14425	1	0.277298	11.4701		*		0
GOTERM_BP_ALL	GO:0050778~positive regulation of immune response	18	0.13731	0.0070281	IRAK1, MBL2, CARD9, C4A, MASP2, STAT5A, PTPN22, MALT1, C1S, FCGR3, C8G, C8B, SLC11A1, CD55, GM5077, NOD2, PSEN2, CFH	925	136	14219	2.03452	1	0.283108	11.9154		*		0
GOTERM_BP_ALL	GO:0016064~immunoglobulin mediated immune response	11	0.0839118	0.00704562	MBL2, C8B, GM5077, CD55, NOD2, C4A, MASP2, C1S, INPP5D, C8G, FCGR3	925	63	14219	2.68398	1	0.279961	11.9433		*		0
GOTERM_BP_ALL	GO:0002376~immune system process	70	0.533984	0.0071098	BMI1, HPRT, MASP2, ELF4, STAT5A, MITF, SUSD2, H2-D1, PTPN22, FGF10, NOD2, TMEM173, OASL1, CFH, FGF3, IRAK1, C4A, LY96, RELB, OSTM1, ZFR2, DNASE2A, C8G, SIGIRR, OSM, C8B, UNC13D, H2-OA, PSEN2, OAS1B, CD300LF, OAS1A, OAS1G, H2-T3, MBL2, LST1, LOC100047396, IFI30, NLRX1, ACP5, SFPI1, OAS2, KIT, C1S, TRIM10, TIMP1, HSH2D, SLC11A1, NDRG1, INPP5D, SELPLG, CD27, CD7, THPO, TESC, CARD9, CD300E, ROGDI, H2…	925	791	14219	1.36034	1	0.278449	12.0456		*		0
GOTERM_BP_ALL	GO:0010942~positive regulation of cell death	28	0.213594	0.00721873	LST1, HTATIP2, RRM2B, GPX1, CDKN2A, CASP9, RPS3A, APOE, ALDH1A3, CASP7, PYCARD, INPP5D, CD27, LGALS12, NDUFA13, INHA, CDK5, DDIT3, FCGR3, TRADD, PLEKHF1, CDKN1A, EI24, UNC13D, NUPR1, CASP14, PSEN2, BMP7	925	252	14219	1.70799	1	0.278448	12.2191		*		5
GOTERM_BP_ALL	GO:0002252~immune effector process	17	0.129682	0.00755449	MBL2, CARD9, C4A, MASP2, C1S, FCGR3, C8G, TRAF3IP2, SLC11A1, C8B, CD55, GM5077, NOD2, UNC13D, CFH, INPP5D, CD27	925	126	14219	2.07399	1	0.285726	12.7516		*		0
GOTERM_BP_ALL	GO:0051452~intracellular pH reduction	4	0.0305134	0.00785376	CLN3, SLC11A1, AQP11, CLN5	925	7	14219	8.78394	1	0.291586	13.2236		*		0
GOTERM_BP_ALL	GO:0006631~fatty acid metabolic process	22	0.167824	0.00840893	SCD1, SLC27A1, HACL1, ECH1, HNF1A, ALOXE3, ACADS, EHHADH, STAT5A, EPHX2, ACSBG2, ECHDC2, CRAT, FADS6, PHYH, CPT1A, ACSF2, ACOX3, MLYCD, ELOVL7, LIPC, HADH	925	184	14219	1.83794	1	0.305003	14.093		*		0
GOTERM_BP_ALL	GO:0019724~B cell mediated immunity	11	0.0839118	0.00878301	MBL2, C8B, GM5077, CD55, NOD2, C4A, MASP2, C1S, INPP5D, C8G, FCGR3	925	65	14219	2.6014	1	0.312487	14.6741		*		0
GOTERM_BP_ALL	GO:0010941~regulation of cell death	52	0.396674	0.00990893	BMI1, HTATIP2, STAT5A, MITF, GPX1, NOD2, CDKN2A, CASP9, RPS3A, APOE, CASP7, CLN3, CD3G, SGK3, LGALS12, NDUFA13, INHA, UBE2B, CDK5, DDIT3, EYA1, UNC13D, CD59B, BTG1, PSEN2, TRAF1, LST1, 1110007C09RIK, MGMT, KIT, BDKRB2, RRM2B, TNFRSF4, TIMP1, ALDH1A3, PYCARD, INPP5D, CD27, SPP1, CARD9, BIRC7, MALT1, CARD6, FCGR3, TRADD, PLEKHF1, EI24, CDKN1A, SARM1, NUPR1, CASP14, BMP7	925	563	14219	1.41978	1	0.340971	16.4008		*		5
GOTERM_BP_ALL	GO:0007389~pattern specification process	30	0.22885	0.0105008	BMI1, HNF1B, CDX1, DYNC2LI1, FGF10, ZEB1, SEMA5A, ALDH1A2, LHX2, HOXC4, GATA4, AXIN2, PCSK6, GSC, LMX1B, OOEP, OTX1, VAX2, LEFTY1, HOXD9, HES1, HOXB4, EYA1, HOXD8, SFRP1, HOXC13, PSEN2, IFT52, BMP7, TBX18	925	284	14219	1.62379	1	0.35331	17.2953		*		1
GOTERM_BP_ALL	GO:0044248~cellular catabolic process	73	0.556869	0.0112839	ALDH1L1, HEXA, AMT, EHHADH, HEXB, CBX4, TRIM50, MYLIP, RNF181, ACOX3, AUH, GPX1, GSTM4, ZYG11A, MGRN1, APOE, TPP1, SMPDL3A, GM4902, RAB24, FBXL12, PDE8B, PDE8A, CAT, SUCLA2, CLN3, HAL, GM6907, CDO1, UBE2B, PNPLA3, CDK5, DNASE2A, ASB8, NAALAD2, NAPEPLD, FBXL8, PIAS3, PSEN2, UBC, DDB2, UBD, FBXL4, PLA2G2C, NEURL2, ZER1, UBE2T, FBXL2, HACL1, ACSBG2, OAS2, UEVLD, GALC, IDH2, DMGDH, FBXO44, ENTPD2, D1…	925	848	14219	1.32329	1	0.37008	18.4649		*		0
GOTERM_BP_ALL	GO:0051248~negative regulation of protein metabolic process	12	0.0915402	0.0117223	CLN3, CDKN2A, CD59B, INPP5K, INPP5J, GRIN2C, PSEN2, BDKRB2, CDK5, UBE2B, EIF2B5, YBX2	925	78	14219	2.36491	1	0.377327	19.1127		*		0
GOTERM_BP_ALL	GO:0006664~glycolipid metabolic process	6	0.0457701	0.0119349	CLN3, ST6GALNAC6, HEXA, HEXB, GALC, KIT	925	22	14219	4.19233	1	0.378703	19.4252		*		0
GOTERM_BP_ALL	GO:0007040~lysosome organization	6	0.0457701	0.0119349	CLN3, TPP1, HEXA, HEXB, CLN5, IDUA	925	22	14219	4.19233	1	0.378703	19.4252		*		0
GOTERM_BP_ALL	GO:0046483~heterocycle metabolic process	30	0.22885	0.0119592	MOCOS, ATP1B1, HNF1A, ALDH1L1, HPRT, STAT5A, LDHD, RSAD1, PPOX, ATP6V0B, ATP5S, GM4902, PDE8B, PDE8A, PTS, ENTPD2, D14ERTD668E, TCIRG1, ALDH6A1, PDXK, CYP1A1, HAL, GM6907, IDO2, NPR1, ATP6V1H, MTHFSD, NPR2, DGUOK, AMPD3, MMAB, HEBP1	925	287	14219	1.60682	1	0.375401	19.4608		*		0
GOTERM_BP_ALL	GO:0002443~leukocyte mediated immunity	13	0.0991685	0.012283	C8B, MBL2, SLC11A1, CD55, NOD2, GM5077, UNC13D, C4A, MASP2, INPP5D, C1S, FCGR3, C8G	925	89	14219	2.24533	1	0.379475	19.9343		*		0
GOTERM_BP_ALL	GO:0006950~response to stress	97	0.73995	0.0128963	NG23, SLC27A1, ATP1B1, HNF1A, MASP2, PDGFA, RBM3, H2-D1, FGF10, PDIA5, PTTG1, SLC2A8, GPX2, GPX1, TMEM173, NOD2, CASP9, APOE, GRIN2C, MDFIC, D17H6S56E-3, INSIG1, CREB3L2, CFH, SOX15, HSF4, CAT, NQO1, LUC7L3, RTEL1, EIF2B5, IRAK1, CLN3, POLK, C4A, ACADS, LY96, NEIL3, RINT1, NEIL2, SAA3, UBE2B, DDIT3, C8G, SIGIRR, SPDYA, OSM, C8B, EYA1, RPAIN, UNC13D, HSPB8, F2, DDB2, NFE2L2, CTSB, DMC1, PROS1, MBL…	925	1184	14219	1.25935	1	0.390274	20.8239		*		0
GOTERM_BP_ALL	GO:0031076~embryonic camera-type eye development	5	0.0381417	0.0135744	ALDH1A2, ALDH1A3, FGF10, ZEB1, BMP7	925	15	14219	5.12396	1	0.402106	21.7965		*		1
GOTERM_BP_ALL	GO:0043067~regulation of programmed cell death	51	0.389046	0.0136626	BMI1, HTATIP2, STAT5A, MITF, GPX1, NOD2, CDKN2A, CASP9, RPS3A, APOE, CASP7, CLN3, CD3G, SGK3, LGALS12, NDUFA13, INHA, UBE2B, CDK5, DDIT3, EYA1, UNC13D, BTG1, PSEN2, TRAF1, LST1, 1110007C09RIK, MGMT, KIT, BDKRB2, RRM2B, TNFRSF4, TIMP1, ALDH1A3, PYCARD, INPP5D, CD27, SPP1, CARD9, BIRC7, MALT1, CARD6, FCGR3, TRADD, PLEKHF1, EI24, CDKN1A, SARM1, NUPR1, CASP14, BMP7	925	560	14219	1.39994	1	0.400246	21.9223		*		5
GOTERM_BP_ALL	GO:0050766~positive regulation of phagocytosis	6	0.0457701	0.0144526	MBL2, SLC11A1, NOD2, SIRPA, AHSG, FCGR3	925	23	14219	4.01006	1	0.41394	23.0396		*		0
GOTERM_BP_ALL	GO:0044238~primary metabolic process	437	3.33359	0.0145724	LDHB, FHIT, GBGT1, MASP2, PGC, EHHADH, BC016495, LDHD, MYLIP, CLK1, CTTNBP2, MAMSTR, PGPEP1, MAP3K8, RPL11, OGT, LUC7L3, RCOR3, C4A, ZSCAN4E, ZSCAN4C, NAPEPLD, RPS15, F2, MST1R, HACL1, MST1, ACSBG2, TRPT1, PPCDC, NAGK, ATP6V0B, ZSCAN5B, HESX1, RPS27, PPP1R3B, NAGA, RPS8, GCFC1, DMRTC2, MLYCD, HNF1B, HNF1A, HTATIP2, ELF4, EZH1, RNF181, ASAH1, AUH, YBX2, ST6GALNAC6, MGRN1, SMPDL3A, EEF2K, FBXL12, H…	925	6211	14219	1.08155	1	0.412704	23.2077		*		0
GOTERM_BP_ALL	GO:0051186~cofactor metabolic process	21	0.160195	0.0147132	MOCOS, ALDH1L1, HNF1A, EHHADH, BC016495, NADSYN1, MTHFSD, GGT1, RSAD1, PPOX, PPCDC, MMAB, GSS, ACSS1, ISCA2, MLYCD, HEBP1, IDH2, RPIA, SUCLA2, MYH7B	925	182	14219	1.77368	1	0.411944	23.4049		*		0
GOTERM_BP_ALL	GO:0006826~iron ion transport	7	0.0533984	0.0156628	STEAP4, SLC11A1, FTL1, SFXN3, SFXN4, SFXN2, SCARA5	925	32	14219	3.3626	1	0.42807	24.722		*		0
GOTERM_BP_ALL	GO:0009408~response to heat	7	0.0533984	0.0156628	OSM, ACCN3, HSPB8, MYOF, SCARA5, EIF2B5, 2310046K01RIK	925	32	14219	3.3626	1	0.42807	24.722		*		0
GOTERM_BP_ALL	GO:0006725~cellular aromatic compound metabolic process	15	0.114425	0.0157762	MOCOS, ALDH6A1, ALDH1L1, CYP1A1, HPRT, EPHX2, IDO2, EPHX1, MTHFSD, NPR1, CLYBL, AMPD3, GSTM4, LY6E, PTS	925	114	14219	2.02262	1	0.426614	24.8779		*		0
GOTERM_BP_ALL	GO:0048871~multicellular organismal homeostasis	11	0.0839118	0.0159892	GPX2, ADRB3, SLC11A1, GPX1, PRDM14, HNF1A, TEX15, TPP1, ACP5, KLHL10, CD7	925	71	14219	2.38156	1	0.427194	25.1697		PRDM14		0
GOTERM_BP_ALL	GO:0045926~negative regulation of growth	11	0.0839118	0.0159892	MBL2, ADRB3, RNF6, NOD2, EI24, CDKN2A, ULK1, SEMA3F, NDUFA13, CAPRIN2, AHSG	925	71	14219	2.38156	1	0.427194	25.1697		*		1
GOTERM_BP_ALL	GO:0042981~regulation of apoptosis	50	0.381417	0.0164136	BMI1, HTATIP2, STAT5A, MITF, GPX1, NOD2, CDKN2A, CASP9, RPS3A, APOE, CASP7, CLN3, CD3G, SGK3, LGALS12, NDUFA13, INHA, UBE2B, CDK5, DDIT3, EYA1, UNC13D, BTG1, PSEN2, TRAF1, LST1, 1110007C09RIK, MGMT, BDKRB2, RRM2B, TNFRSF4, TIMP1, ALDH1A3, PYCARD, INPP5D, CD27, SPP1, CARD9, BIRC7, MALT1, CARD6, TRADD, FCGR3, PLEKHF1, EI24, CDKN1A, SARM1, NUPR1, CASP14, BMP7	925	553	14219	1.38986	1	0.43195	25.7482		*		5
GOTERM_BP_ALL	GO:0045851~pH reduction	4	0.0305134	0.0170886	CLN3, SLC11A1, AQP11, CLN5	925	9	14219	6.83195	1	0.441395	26.6595		*		0
GOTERM_BP_ALL	GO:0032269~negative regulation of cellular protein metabolic process	11	0.0839118	0.0175236	CLN3, CDKN2A, CD59B, INPP5K, INPP5J, PSEN2, BDKRB2, CDK5, UBE2B, EIF2B5, YBX2	925	72	14219	2.34848	1	0.445981	27.2411		*		0
GOTERM_BP_ALL	GO:0010646~regulation of cell communication	66	0.503471	0.0175815	SNCG, HNF1A, PREX1, RASGEF1A, FGF10, ZEB1, SYNGR1, GARNL3, GPX1, NOD2, S1PR1, CDKN2A, MDFIC, GRIN2C, TBC1D13, CAT, IRAK1, CLN3, RAMP2, MYO6, GSC, ARHGEF19, SIPA1L2, PFKM, CDK5, SIGIRR, OSM, SSTR5, SGSM1, PSEN2, ARFGAP3, LST1, CTNND2, KIT, PRDM16, AHSG, ADRB3, PLEKHG3, RGMA, PLEKHG1, RASGRP4, ALDH1A3, RASGRP1, INPP5D, AXIN2, PPAP2B, AFAP1, CD27, ICA1, CARD9, KLB, PSAP, MCF2, NLGN1, SIRT4, MALT1, C…	925	771	14219	1.31588	1	0.443418	27.3182		*		0
GOTERM_BP_ALL	GO:0009611~response to wounding	34	0.259364	0.0179334	MBL2, MASP2, MST1, C1S, TNFRSF4, AHSG, SLC11A1, GPX1, NOD2, ANXA8, GRIN2C, POU2F3, CFH, PYCARD, SOX15, ENTPD2, FN1, C4A, LY96, EPHX2, SAA3, FCGR3, SIGIRR, C8G, C8B, VWF, CD55, GM5077, UNC13D, NUPR1, F2, CTSB, PROS1, HDAC7	925	347	14219	1.50618	1	0.446342	27.7852		*		0
GOTERM_BP_ALL	GO:0060627~regulation of vesicle-mediated transport	12	0.0915402	0.018164	MBL2, SLC11A1, NOD2, FGF10, SCARB1, VAMP2, CD63, CDK5, SIRPA, AHSG, EPN2, FCGR3	925	83	14219	2.22244	1	0.446985	28.0896		*		0
GOTERM_BP_ALL	GO:0043065~positive regulation of apoptosis	26	0.198337	0.019243	LST1, LGALS12, NDUFA13, RRM2B, INHA, CDK5, DDIT3, FCGR3, TRADD, PLEKHF1, GPX1, EI24, UNC13D, CDKN2A, NUPR1, CASP9, APOE, RPS3A, CASP14, CASP7, ALDH1A3, PSEN2, PYCARD, INPP5D, BMP7, CD27	925	248	14219	1.61157	1	0.462674	29.4979		*		5
GOTERM_BP_ALL	GO:0006091~generation of precursor metabolites and energy	27	0.205965	0.0197359	PHKA2, NDUFB4, LDHB, BC002163, ALDOC, OGDHL, HK1, ATP6V0B, UEVLD, UQCR10, PPP1R3B, IDH2, ENO2, CAT, SUCLA2, TCIRG1, NDUFA3, LDHAL6B, GM8615, PHKG1, CYCT, NDUFA6, NDUFA13, ATP6V1H, PFKM, GAPDHS, SLC37A2	925	261	14219	1.5902	1	0.467644	30.1327		*		0
GOTERM_BP_ALL	GO:0006954~inflammatory response	24	0.18308	0.0207791	MBL2, C4A, MASP2, LY96, EPHX2, SAA3, C1S, TNFRSF4, SIGIRR, FCGR3, C8G, AHSG, C8B, SLC11A1, CD55, NOD2, GM5077, UNC13D, NUPR1, F2, PYCARD, CFH, HDAC7, FN1	925	225	14219	1.63967	1	0.481662	31.4581		*		0
GOTERM_BP_ALL	GO:0002573~myeloid leukocyte differentiation	7	0.0533984	0.0208299	RELB, MITF, PSEN2, CD300LF, SFPI1, OSTM1, KIT	925	34	14219	3.1648	1	0.478939	31.522		*		1
GOTERM_BP_ALL	GO:0009952~anterior/posterior pattern formation	18	0.13731	0.0211068	BMI1, CDX1, HNF1B, OTX1, LEFTY1, HOXD9, HES1, ALDH1A2, HOXB4, HOXD8, SFRP1, HOXC13, HOXC4, GATA4, PSEN2, AXIN2, PCSK6, TBX18	925	153	14219	1.80846	1	0.479953	31.8695		*		0
GOTERM_BP_ALL	GO:0006355~regulation of transcription, DNA-dependent	115	0.87726	0.0218806	CDX1, STAT5A, CBX4, CBX8, S1PR1, CDKN2A, MDFIC, HOXC4, GATA4, TRAK1, CREB3L2, GM4769, ZFP273, ZSCAN4E, TCFAP2A, RELB, VAX2, OBOX6, ZSCAN4C, ZFP78, DDIT3, PPARGC1B, HOXD9, HES1, TCFCP2, HOXD8, NFE2L2, NFE2L3, SFPI1, ZSCAN5B, ZFP455, PLAGL1, HESX1, SLC11A1, AHRR, 6330416L07RIK, LHX2, TEAD4, 1700048O20RIK, ZFP810, TESC, SMAD9, ZFP600, MAML2, 2210012G02RIK, HOXB4, ATF4, RNF6, EBF4, DMRTC2, C230055K05…	925	1465	14219	1.20667	1	0.488882	32.8318		*		0
GOTERM_BP_ALL	GO:0009108~coenzyme biosynthetic process	10	0.0762835	0.0218856	GSS, MOCOS, ACSS1, MLYCD, BC016495, NADSYN1, MTHFSD, GGT1, PPCDC, MYH7B	925	64	14219	2.40186	1	0.485485	32.8381		*		0
GOTERM_BP_ALL	GO:0003002~regionalization	23	0.175452	0.0220659	BMI1, CDX1, HNF1B, GSC, LMX1B, OTX1, VAX2, LEFTY1, HOXD9, HES1, ALDH1A2, HOXB4, HOXD8, SFRP1, HOXC13, HOXC4, LHX2, GATA4, PSEN2, IFT52, PCSK6, AXIN2, TBX18	925	214	14219	1.65212	1	0.484885	33.0604		*		1
GOTERM_BP_ALL	GO:0006869~lipid transport	15	0.114425	0.0221832	ABCA7, SLC27A1, RFT1, HNF1A, TNRC18, OSBPL6, OSBPL7, SORL1, APOC1, NPC2, APOE, STARD6, SCARB1, LIPC, PLTP	925	119	14219	1.93763	1	0.483319	33.2047		*		0
GOTERM_BP_ALL	GO:0044237~cellular metabolic process	411	3.13525	0.0224606	LDHB, FHIT, GBGT1, EHHADH, BC016495, LDHD, MYLIP, CLK1, CTTNBP2, MAMSTR, MAP3K8, RPL11, OGT, LUC7L3, RCOR3, CYP1A1, ZSCAN4E, ZSCAN4C, NAPEPLD, RPS15, MST1R, HACL1, ACSBG2, ACP5, TRPT1, PPCDC, NAGK, ATP6V0B, ZSCAN5B, HESX1, RPS27, PPP1R3B, RPS8, GCFC1, DMRTC2, MLYCD, HEBP1, SGSH, HNF1B, HNF1A, HTATIP2, ELF4, EZH1, RNF181, YBX2, AUH, ST6GALNAC6, MGRN1, SMPDL3A, EEF2K, FBXL12, HSF4, CLN3, EXOSC8, LD…	925	5857	14219	1.07868	1	0.484246	33.5448		*		0
GOTERM_BP_ALL	GO:0080135~regulation of cellular response to stress	11	0.0839118	0.0227776	NTRK3, CLN3, IRAK1, NOD2, EYA1, CARD9, CDKN2A, TEX15, MDFIC, CD27, RTEL1	925	75	14219	2.25454	1	0.485756	33.9314		*		0
GOTERM_BP_ALL	GO:0042693~muscle cell fate commitment	3	0.022885	0.023176	MYL2, TBX2, FGF10	925	4	14219	11.5289	1	0.488455	34.4142		*
GOTERM_BP_ALL	GO:0006917~induction of apoptosis	19	0.144939	0.0237585	LST1, LGALS12, NDUFA13, RRM2B, INHA, FCGR3, TRADD, PLEKHF1, GPX1, EI24, UNC13D, NUPR1, CASP9, CASP14, APOE, RPS3A, CASP7, PYCARD, CD27	925	167	14219	1.7489	1	0.493801	35.1142		*		5
GOTERM_BP_ALL	GO:0012502~induction of programmed cell death	19	0.144939	0.0237585	LST1, LGALS12, NDUFA13, RRM2B, INHA, FCGR3, TRADD, PLEKHF1, GPX1, EI24, UNC13D, NUPR1, CASP9, CASP14, APOE, RPS3A, CASP7, PYCARD, CD27	925	167	14219	1.7489	1	0.493801	35.1142		*		5
GOTERM_BP_ALL	GO:0006641~triglyceride metabolic process	7	0.0533984	0.0270423	GPX1, INSIG1, APOC1, CAT, GPAT2, LIPC, PNPLA3	925	36	14219	2.98898	1	0.536479	38.9301		*		0
GOTERM_BP_ALL	GO:0009100~glycoprotein metabolic process	17	0.129682	0.0293289	GNPTG, SGSH, CLN3, SEC1, ST6GAL2, ALG6, ST6GALNAC6, ST3GAL3, ST3GAL4, TRAK1, PSEN2, B3GALNT2, CHST8, FUT2, OGT, LIPC, UGGT2	925	147	14219	1.7777	1	0.562681	41.461		*		0
GOTERM_BP_ALL	GO:0033135~regulation of peptidyl-serine phosphorylation	4	0.0305134	0.0304539	OSM, INPP5K, INPP5J, BDKRB2	925	11	14219	5.58978	1	0.573165	42.6695		*		0
GOTERM_BP_ALL	GO:0006044~N-acetylglucosamine metabolic process	4	0.0305134	0.0304539	AMDHD2, RENBP, GM8615, NAGK	925	11	14219	5.58978	1	0.573165	42.6695		*		0
GOTERM_BP_ALL	GO:0006041~glucosamine metabolic process	4	0.0305134	0.0304539	AMDHD2, RENBP, GM8615, NAGK	925	11	14219	5.58978	1	0.573165	42.6695		*		0
GOTERM_BP_ALL	GO:0009893~positive regulation of metabolic process	58	0.442444	0.0304703	HNF1B, CDX1, HNF1A, HTATIP2, HPRT, ELF4, STAT5A, MITF, ZEB1, RFXANK, ZBTB38, NOD2, S1PR1, APOE, MDFIC, GATA4, TSIX, SOX15, HSF4, EIF2B5, HMGA1, UBE2B, PPARGC1B, CDK2, DDIT3, HES1, HOXD9, OSM, EYA1, PIAS3, NFE2L2, ABLIM1, ABLIM2, RAG1AP1, SFPI1, KIT, PRDM16, PLAGL1, ADRB3, SLC11A1, RGMA, AHRR, NPAS2, POU2F3, TEAD4, DAZL, CD27, TESC, LMX1B, MAML2, NPR1, AFF1, FCGR3, GAPDHS, ATF4, RNF6, IFT52, BMP7	925	683	14219	1.30537	1	0.570017	42.687		*		0
GOTERM_BP_ALL	GO:0050871~positive regulation of B cell activation	7	0.0533984	0.0305631	BMI1, CD38, CDKN1A, STAT5A, IL2RG, INPP5D, TNFRSF4	925	37	14219	2.9082	1	0.567824	42.7856		*		0
GOTERM_BP_ALL	GO:0030308~negative regulation of cell growth	8	0.0610268	0.0309183	RNF6, EI24, CDKN2A, ULK1, SEMA3F, NDUFA13, CAPRIN2, AHSG	925	47	14219	2.61649	1	0.568799	43.1615		*		1
GOTERM_BP_ALL	GO:0031325~positive regulation of cellular metabolic process	55	0.419559	0.0318331	HNF1B, CDX1, HTATIP2, HNF1A, HPRT, ELF4, STAT5A, MITF, ZEB1, RFXANK, ZBTB38, NOD2, S1PR1, MDFIC, APOE, GATA4, TSIX, SOX15, HSF4, EIF2B5, HMGA1, UBE2B, PPARGC1B, CDK2, DDIT3, HES1, HOXD9, OSM, EYA1, PIAS3, NFE2L2, ABLIM1, ABLIM2, SFPI1, PRDM16, PLAGL1, RGMA, SLC11A1, AHRR, NPAS2, POU2F3, TEAD4, DAZL, CD27, TESC, LMX1B, MAML2, NPR1, AFF1, FCGR3, GAPDHS, ATF4, RNF6, IFT52, BMP7	925	644	14219	1.31282	1	0.576305	44.119		*		0
GOTERM_BP_ALL	GO:0043413~biopolymer glycosylation	12	0.0915402	0.0334551	GNPTG, ST6GALNAC6, SEC1, ST3GAL3, ST6GAL2, ST3GAL4, B3GALNT2, TRAK1, ALG6, OGT, FUT2, UGGT2	925	91	14219	2.02706	1	0.591496	45.7793		*		0
GOTERM_BP_ALL	GO:0070085~glycosylation	12	0.0915402	0.0334551	GNPTG, ST6GALNAC6, SEC1, ST3GAL3, ST6GAL2, ST3GAL4, B3GALNT2, TRAK1, ALG6, OGT, FUT2, UGGT2	925	91	14219	2.02706	1	0.591496	45.7793		*		0
GOTERM_BP_ALL	GO:0006486~protein amino acid glycosylation	12	0.0915402	0.0334551	GNPTG, ST6GALNAC6, SEC1, ST3GAL3, ST6GAL2, ST3GAL4, B3GALNT2, TRAK1, ALG6, OGT, FUT2, UGGT2	925	91	14219	2.02706	1	0.591496	45.7793		*		0
GOTERM_BP_ALL	GO:0010604~positive regulation of macromolecule metabolic process	54	0.411931	0.0339202	HNF1B, CDX1, HTATIP2, HNF1A, ELF4, STAT5A, MITF, ZEB1, RFXANK, ZBTB38, NOD2, S1PR1, MDFIC, GATA4, TSIX, SOX15, HSF4, EIF2B5, HMGA1, UBE2B, PPARGC1B, CDK2, DDIT3, HES1, HOXD9, OSM, EYA1, PIAS3, NFE2L2, ABLIM1, ABLIM2, RAG1AP1, SFPI1, KIT, PRDM16, PLAGL1, RGMA, SLC11A1, AHRR, NPAS2, POU2F3, TEAD4, DAZL, CD27, TESC, LMX1B, MAML2, AFF1, FCGR3, GAPDHS, ATF4, RNF6, IFT52, BMP7	925	633	14219	1.31135	1	0.593412	46.2468		*		0
GOTERM_BP_ALL	GO:0048646~anatomical structure formation involved in morphogenesis	34	0.259364	0.0339661	HNF1B, HTATIP2, HNF1A, MYL2, PDGFA, FGF10, NEO1, HESX1, SEMA5A, RGMA, ANGPTL6, GPX1, CD9, S1PR1, ALDH1A3, CCBE1, TEAD4, AXIN2, FIGF, TLX2, TBX2, VHL, TCFAP2A, UBE2B, CDK5, NTN3, CXCL17, SFRP1, ULK1, PSEN2, IFT52, BMP7, NEURL2, TBX18	925	365	14219	1.4319	1	0.590721	46.2927		*		1
GOTERM_BP_ALL	GO:0018904~organic ether metabolic process	8	0.0610268	0.0342442	GPX1, CYP1A1, INSIG1, APOC1, CAT, GPAT2, LIPC, PNPLA3	925	48	14219	2.56198	1	0.590588	46.5701		*		0
GOTERM_BP_ALL	GO:0031400~negative regulation of protein modification process	7	0.0533984	0.0343705	CDKN2A, INPP5K, INPP5J, PSEN2, BDKRB2, CDK5, UBE2B	925	38	14219	2.83166	1	0.58882	46.6956		*		0
GOTERM_BP_ALL	GO:0051252~regulation of RNA metabolic process	115	0.87726	0.0343969	CDX1, STAT5A, CBX4, CBX8, S1PR1, CDKN2A, MDFIC, HOXC4, GATA4, TRAK1, CREB3L2, GM4769, ZFP273, ZSCAN4E, TCFAP2A, RELB, VAX2, OBOX6, ZSCAN4C, ZFP78, DDIT3, PPARGC1B, HOXD9, HES1, TCFCP2, HOXD8, NFE2L2, NFE2L3, SFPI1, ZSCAN5B, ZFP455, PLAGL1, HESX1, SLC11A1, AHRR, 6330416L07RIK, LHX2, TEAD4, 1700048O20RIK, ZFP810, TESC, SMAD9, ZFP600, MAML2, 2210012G02RIK, HOXB4, ATF4, RNF6, EBF4, DMRTC2, C230055K05…	925	1488	14219	1.18802	1	0.585997	46.7219		*		0
GOTERM_BP_ALL	GO:0016054~organic acid catabolic process	11	0.0839118	0.0365441	HACL1, AMT, EHHADH, HAL, IDO2, ACSBG2, DMGDH, CDO1, PHYH, ACOX3, AUH	925	81	14219	2.08754	1	0.605481	48.8133		*		0
GOTERM_BP_ALL	GO:0046395~carboxylic acid catabolic process	11	0.0839118	0.0365441	HACL1, AMT, EHHADH, HAL, IDO2, ACSBG2, DMGDH, CDO1, PHYH, ACOX3, AUH	925	81	14219	2.08754	1	0.605481	48.8133		*		0
GOTERM_BP_ALL	GO:0033137~negative regulation of peptidyl-serine phosphorylation	3	0.022885	0.0369754	INPP5K, INPP5J, BDKRB2	925	5	14219	9.22314	1	0.606798	49.2239		*		0
GOTERM_BP_ALL	GO:0046479~glycosphingolipid catabolic process	3	0.022885	0.0369754	HEXA, HEXB, GALC	925	5	14219	9.22314	1	0.606798	49.2239		*		0
GOTERM_BP_ALL	GO:0009636~response to toxin	6	0.0457701	0.0370391	GPX1, NUPR1, EPHX2, MT2, EPHX1, MT1	925	29	14219	3.18039	1	0.604396	49.2842		*		0
GOTERM_BP_ALL	GO:0031345~negative regulation of cell projection organization	5	0.0381417	0.0372482	RNF6, INPP5J, ULK1, SEMA3F, TLX2	925	20	14219	3.84297	1	0.603482	49.482		*		1
GOTERM_BP_ALL	GO:0007566~embryo implantation	5	0.0381417	0.0372482	OOEP, ZSCAN4E, GRN, TEAD4, MST1, ZSCAN4C	925	20	14219	3.84297	1	0.603482	49.482		*		0
GOTERM_BP_ALL	GO:0006909~phagocytosis	8	0.0610268	0.0377992	ABCA7, SLC11A1, UNC13D, SCARB1, CELA2A, SIRPA, ELMOD2, FCGR3	925	49	14219	2.5097	1	0.605978	49.9996		*		0
GOTERM_BP_ALL	GO:0006812~cation transport	45	0.343276	0.0380375	STEAP4, SLC9A8, GM5134, ATP1B1, KCNC4, FTL1, SLC39A11, KCNAB2, SLC39A13, SFXN3, SFXN4, ATP6V1G2, SFXN2, ATP6V1G1, KCNIP2, ATP6V0B, TPCN2, KCNU1, SLC11A1, ATP5S, MCOLN1, SLC39A4, SCNN1A, SLC31A1, SLC12A6, TCIRG1, SLC12A7, SLC12A8, SLC10A6, CACNG5, SLC24A6, ATP6V1H, TCN2, CDK2, SLC34A3, KCTD6, P2RX4, ACCN3, CATSPER2, PSEN2, SLC41A3, KCTD18, SCN8A, SLC30A10, SCARA5	925	515	14219	1.34318	1	0.605358	50.2219		*		0
GOTERM_BP_ALL	GO:0051129~negative regulation of cellular component organization	12	0.0915402	0.0383863	RNF6, LIMA1, S1PR1, INPP5J, ULK1, MAPT, SEMA3F, CAPZA1, UBE2B, TLX2, KANK1, MAP6D1	925	93	14219	1.98347	1	0.605827	50.5456		*		4
GOTERM_BP_ALL	GO:0048477~oogenesis	7	0.0533984	0.038471	REC8, HEXB, PAQR8, DAZL, DMC1, SOHLH2, YBX2	925	39	14219	2.75906	1	0.603728	50.6238		*		1
GOTERM_BP_ALL	GO:0046470~phosphatidylcholine metabolic process	4	0.0305134	0.0386872	PNPLA7, CHKB, FABP3, LIPC	925	12	14219	5.12396	1	0.602925	50.8232		*		0
GOTERM_BP_ALL	GO:0002920~regulation of humoral immune response	4	0.0305134	0.0386872	CD37, NOD2, CD59B, CFH	925	12	14219	5.12396	1	0.602925	50.8232		*		0
GOTERM_BP_ALL	GO:0009101~glycoprotein biosynthetic process	14	0.106797	0.0402635	GNPTG, SEC1, ST6GAL2, ALG6, ST6GALNAC6, ST3GAL3, ST3GAL4, TRAK1, B3GALNT2, CHST8, OGT, FUT2, LIPC, UGGT2	925	117	14219	1.83937	1	0.615008	52.2537		*		0
GOTERM_BP_ALL	GO:0006575~cellular amino acid derivative metabolic process	16	0.122054	0.0405477	HPRT, CHKB, STAT5A, IDO2, NPR1, GGT1, PADI4, CDO1, PADI1, PNPLA7, GSS, LY6E, FABP3, LIPC, ADC, MYH7B	925	141	14219	1.74433	1	0.614786	52.5074		*		0
GOTERM_BP_ALL	GO:0046486~glycerolipid metabolic process	15	0.114425	0.0405581	PIGYL, CHKB, TAZ, APOC1, PIP5K1B, GPAT2, PIGP, PNPLA3, PNPLA7, GPX1, INSIG1, FABP3, CAT, LIPC, IP6K1	925	129	14219	1.78743	1	0.612045	52.5167		*		0
GOTERM_BP_ALL	GO:0051100~negative regulation of binding	6	0.0457701	0.0421554	NOD2, CAT, TNFRSF4, DDIT3, SIGIRR, YBX2	925	30	14219	3.07438	1	0.623732	53.9188		*		0
GOTERM_BP_ALL	GO:0006811~ion transport	59	0.450072	0.0430196	STEAP4, SLC9A8, ATP1B1, KCNC4, GM5134, SLC22A18, KCNAB2, KCNIP2, SLC26A11, KCNU1, CTTNBP2, GRIN2C, ATP5S, MCOLN1, ANO9, SLC4A5, SLC12A6, SLC12A7, SLC12A8, GABRG3, CACNG5, ATP6V1H, SLC24A6, TCN2, CDK2, SLC34A3, PKD2L1, TRPM1, CATSPER2, PSEN2, SLC41A3, SLC30A10, CLCN1, FTL1, SLC39A11, SLC39A13, SFXN3, SFXN4, CLCNKB, ATP6V1G2, ATP6V1G1, SFXN2, ATP6V0B, TPCN2, PKD1L3, SLC11A1, SLC39A4, SCNN1A, SLC31A…	925	712	14219	1.27379	1	0.628563	54.6609		*		0
GOTERM_BP_ALL	GO:0044106~cellular amine metabolic process	25	0.190709	0.0450112	CLN3, ALDH6A1, BHMT2, ACY1, HPRT, AMT, STAT5A, CHKB, GOT1L1, HAL, GM6907, IDO2, NPR1, ASNS, PADI4, CDO1, DDO, PADI1, AUH, PNPLA7, LY6E, GM4902, FABP3, DMGDH, LIPC, ADC, D14ERTD668E	925	256	14219	1.50116	1	0.642814	56.3286		*		0
GOTERM_BP_ALL	GO:0006665~sphingolipid metabolic process	9	0.0686551	0.0464929	CLN3, ST6GALNAC6, SMPDL3A, PSAP, HEXA, HEXB, GALC, CERK, KIT	925	62	14219	2.2314	1	0.652248	57.5315		*		0
GOTERM_BP_ALL	GO:0030099~myeloid cell differentiation	12	0.0915402	0.0466988	TESC, RELB, MITF, PSEN2, CD300LF, SFPI1, OSTM1, KIT, TRIM10, DNASE2A, THPO, TIMP1	925	96	14219	1.92149	1	0.65118	57.6962		*		1
GOTERM_BP_ALL	GO:0044092~negative regulation of molecular function	15	0.114425	0.0477279	CLN3, NPB, GABBR1, TNFRSF4, DDIT3, SIGIRR, YBX2, SSTR2, CDKN1A, NOD2, S1PR1, CDKN2A, CAT, NQO1, GADD45B	925	132	14219	1.74681	1	0.656671	58.5102		*		0
GOTERM_BP_ALL	GO:0033081~regulation of T cell differentiation in the thymus	4	0.0305134	0.0479267	BMI1, CDKN2A, IL2RG, ZEB1	925	13	14219	4.72981	1	0.655545	58.6657		*		0
GOTERM_BP_ALL	GO:0046466~membrane lipid catabolic process	4	0.0305134	0.0479267	SMPDL3A, HEXA, HEXB, GALC	925	13	14219	4.72981	1	0.655545	58.6657		*		0
GOTERM_BP_ALL	GO:0030149~sphingolipid catabolic process	4	0.0305134	0.0479267	SMPDL3A, HEXA, HEXB, GALC	925	13	14219	4.72981	1	0.655545	58.6657		*		0
GOTERM_BP_ALL	GO:0045893~positive regulation of transcription, DNA-dependent	37	0.282249	0.0480059	ABLIM1, ABLIM2, HNF1B, CDX1, HNF1A, HTATIP2, ELF4, STAT5A, MITF, SFPI1, ZEB1, PRDM16, RFXANK, ZBTB38, PLAGL1, SLC11A1, NPAS2, S1PR1, MDFIC, POU2F3, GATA4, TEAD4, TSIX, SOX15, HSF4, TESC, LMX1B, MAML2, AFF1, PPARGC1B, HES1, OSM, HOXD9, ATF4, RNF6, NFE2L2, BMP7	925	416	14219	1.36721	1	0.653496	58.7275		*		0
GOTERM_BP_ALL	GO:0043433~negative regulation of transcription factor activity	5	0.0381417	0.0507865	NOD2, CAT, TNFRSF4, DDIT3, SIGIRR	925	22	14219	3.49361	1	0.672019	60.8431		*		0
GOTERM_BP_ALL	GO:0050796~regulation of insulin secretion	5	0.0381417	0.0507865	SSTR5, HNF1A, SIRT4, PFKM, CPT1A	925	22	14219	3.49361	1	0.672019	60.8431		*		0
GOTERM_BP_ALL	GO:0048878~chemical homeostasis	33	0.251735	0.0516356	SLC9A8, GNA15, FTL1, HNF1A, HEXA, HEXB, CKB, MBP, SLC11A1, CD9, S1PR1, INPP5K, APOE, GRIN2C, AQP11, MT2, MT1, SCARB1, SLC39A4, HRC, IDUA, EIF2B5, CLN3, TESC, PFKM, TNNI3, CDK5, SSTR5, P2RX4, NPC2, LIPC, SCARA5, CLN5	925	365	14219	1.38979	1	0.675621	61.4685		*		0
GOTERM_BP_ALL	GO:0051254~positive regulation of RNA metabolic process	37	0.282249	0.0522879	ABLIM1, ABLIM2, HNF1B, CDX1, HNF1A, HTATIP2, ELF4, STAT5A, MITF, SFPI1, ZEB1, PRDM16, RFXANK, ZBTB38, PLAGL1, SLC11A1, NPAS2, S1PR1, MDFIC, POU2F3, GATA4, TEAD4, TSIX, SOX15, HSF4, TESC, LMX1B, MAML2, AFF1, PPARGC1B, HES1, OSM, HOXD9, ATF4, RNF6, NFE2L2, BMP7	925	419	14219	1.35742	1	0.67773	61.9424		*		0
GOTERM_BP_ALL	GO:0019377~glycolipid catabolic process	3	0.022885	0.0531058	HEXA, HEXB, GALC	925	6	14219	7.68595	1	0.680969	62.5289		*		0
GOTERM_BP_ALL	GO:0043534~blood vessel endothelial cell migration	3	0.022885	0.0531058	GPX1, VHL, SCARB1	925	6	14219	7.68595	1	0.680969	62.5289		*		3
GOTERM_BP_ALL	GO:0030888~regulation of B cell proliferation	6	0.0457701	0.053605	BMI1, CD38, CDKN1A, CDKN2A, INPP5D, TNFRSF4	925	32	14219	2.88223	1	0.681917	62.8827		*		3
GOTERM_BP_ALL	GO:0045792~negative regulation of cell size	8	0.0610268	0.0543963	RNF6, EI24, CDKN2A, ULK1, SEMA3F, NDUFA13, CAPRIN2, AHSG	925	53	14219	2.32029	1	0.684866	63.437		*		4
GOTERM_BP_ALL	GO:0010628~positive regulation of gene expression	42	0.320391	0.0544188	ABLIM1, ABLIM2, HNF1B, CDX1, HNF1A, RAG1AP1, HTATIP2, ELF4, STAT5A, MITF, SFPI1, ZEB1, KIT, PRDM16, RFXANK, ZBTB38, PLAGL1, SLC11A1, NPAS2, S1PR1, MDFIC, POU2F3, GATA4, TEAD4, TSIX, SOX15, HSF4, TESC, LMX1B, MAML2, AFF1, HMGA1, PPARGC1B, CDK2, DDIT3, HES1, OSM, HOXD9, ATF4, RNF6, NFE2L2, BMP7	925	488	14219	1.32299	1	0.682501	63.4526		*		0
GOTERM_BP_ALL	GO:0006643~membrane lipid metabolic process	9	0.0686551	0.0544262	CLN3, ST6GALNAC6, SMPDL3A, PSAP, HEXA, HEXB, GALC, CERK, KIT	925	64	14219	2.16167	1	0.680048	63.4578		*		0
GOTERM_BP_ALL	GO:0006639~acylglycerol metabolic process	7	0.0533984	0.057897	GPX1, INSIG1, APOC1, CAT, GPAT2, LIPC, PNPLA3	925	43	14219	2.5024	1	0.700668	65.7969		*		0
GOTERM_BP_ALL	GO:0060047~heart contraction	4	0.0305134	0.0581381	GPX1, MYL2, PSEN2, TNNI3	925	14	14219	4.39197	1	0.699766	65.954		*		0
GOTERM_BP_ALL	GO:0048048~embryonic eye morphogenesis	4	0.0305134	0.0581381	ALDH1A3, VAX2, ZEB1, BMP7	925	14	14219	4.39197	1	0.699766	65.954		*		1
GOTERM_BP_ALL	GO:0003015~heart process	4	0.0305134	0.0581381	GPX1, MYL2, PSEN2, TNNI3	925	14	14219	4.39197	1	0.699766	65.954		*		0
GOTERM_BP_ALL	GO:0009062~fatty acid catabolic process	5	0.0381417	0.0584357	HACL1, EHHADH, ACSBG2, PHYH, ACOX3	925	23	14219	3.34172	1	0.699234	66.147		*		0
GOTERM_BP_ALL	GO:0002478~antigen processing and presentation of exogenous peptide antigen	5	0.0381417	0.0584357	H2-OA, H2-EB1, IFI30, H2-AB1, FCGR3	925	23	14219	3.34172	1	0.699234	66.147		*		0
GOTERM_BP_ALL	GO:0044419~interspecies interaction between organisms	5	0.0381417	0.0584357	GPX2, MBL2, GPX1, NLRX1, MST1R	925	23	14219	3.34172	1	0.699234	66.147		*		0
GOTERM_BP_ALL	GO:0001933~negative regulation of protein amino acid phosphorylation	5	0.0381417	0.0584357	INPP5K, INPP5J, PSEN2, BDKRB2, UBE2B	925	23	14219	3.34172	1	0.699234	66.147		*		0
GOTERM_BP_ALL	GO:0030301~cholesterol transport	5	0.0381417	0.0584357	NPC2, HNF1A, APOE, SCARB1, LIPC	925	23	14219	3.34172	1	0.699234	66.147		*		0
GOTERM_BP_ALL	GO:0015918~sterol transport	5	0.0381417	0.0584357	NPC2, HNF1A, APOE, SCARB1, LIPC	925	23	14219	3.34172	1	0.699234	66.147		*		0
GOTERM_BP_ALL	GO:0019725~cellular homeostasis	31	0.236479	0.0585149	SLC9A8, GNA15, FTL1, HEXA, HEXB, PDIA5, CKB, MBP, MTM1, SLC11A1, CD9, S1PR1, APOE, GRIN2C, AQP11, DMD, MT2, MT1, SLC39A4, EIF2B5, SLC12A7, CLN3, TESC, TNNI3, CDK5, DDIT3, P2RX4, TXNDC16, 2700094K13RIK, SCARA5, CLN5	925	343	14219	1.3893	1	0.69732	66.1981		*		0
GOTERM_BP_ALL	GO:0010740~positive regulation of protein kinase cascade	11	0.0839118	0.0588483	OSM, ADRB3, GPX1, NOD2, CARD9, LST1, KLB, FGF10, CAT, CD27, TRADD	925	88	14219	1.92149	1	0.697036	66.4128		*		0
GOTERM_BP_ALL	GO:0048562~embryonic organ morphogenesis	17	0.129682	0.0591366	BMI1, GSC, MYO6, OTX1, TCFAP2A, FGF10, VAX2, ZEB1, HOXD9, HESX1, HOXB4, EYA1, HOXC4, ALDH1A3, GATA4, INSIG1, BMP7	925	161	14219	1.62312	1	0.696471	66.5974		*		1
GOTERM_BP_ALL	GO:0051128~regulation of cellular component organization	30	0.22885	0.0600738	MBL2, LIMA1, LST1, CAPZA1, FGF10, KANK1, AHSG, CTTNBP2, SLC11A1, CDC42EP2, NOD2, S1PR1, INPP5J, MAPT, SEMA3F, SCARB1, TUBG1, TLX2, FN1, CD63, UBE2B, SIRPA, FCGR3, NTRK3, FMN1, RNF6, ULK1, CENPV, MAP6D1, EPN2	925	330	14219	1.39744	1	0.699963	67.1909		*		4
GOTERM_BP_ALL	GO:0051046~regulation of secretion	14	0.106797	0.0624483	SNCG, ICA1, HNF1A, SIRT4, PFKM, TNFRSF4, CDK5, CPT1A, OSM, SSTR5, NOD2, PYCARD, VAMP2, SRGN	925	125	14219	1.72165	1	0.71202	68.6503		*		0
GOTERM_BP_ALL	GO:0010324~membrane invagination	19	0.144939	0.0637169	LY75, SH3GL3, ABCA7, CLN3, MYO6, SORL1, SIRPA, FCGR3, SLC11A1, UNC13D, ULK1, AP3B2, SCARB1, CELA2A, SCARA5, ELMOD2, SH3GL2, DNM1, EPN2	925	188	14219	1.55354	1	0.71714	69.4047		*		0
GOTERM_BP_ALL	GO:0006897~endocytosis	19	0.144939	0.0637169	LY75, SH3GL3, ABCA7, CLN3, MYO6, SORL1, SIRPA, FCGR3, SLC11A1, UNC13D, ULK1, AP3B2, SCARB1, CELA2A, SCARA5, ELMOD2, SH3GL2, DNM1, EPN2	925	188	14219	1.55354	1	0.71714	69.4047		*		0
GOTERM_BP_ALL	GO:0050864~regulation of B cell activation	8	0.0610268	0.0641637	BMI1, CD38, CDKN1A, CDKN2A, STAT5A, IL2RG, INPP5D, TNFRSF4	925	55	14219	2.23591	1	0.717423	69.6662		*		0
GOTERM_BP_ALL	GO:0051321~meiotic cell cycle	11	0.0839118	0.0665607	REC8, TEX15, MAPK1IP1, SGOL1, PIWIL1, STAG3, PTTG1, TUBG1, CCNA1, DMC1, UBE2B	925	90	14219	1.87879	1	0.728643	71.0339		*		0
GOTERM_BP_ALL	GO:0019395~fatty acid oxidation	5	0.0381417	0.0666622	HACL1, EHHADH, ACSBG2, PHYH, ACOX3	925	24	14219	3.20248	1	0.726953	71.0905		*		0
GOTERM_BP_ALL	GO:0034440~lipid oxidation	5	0.0381417	0.0666622	HACL1, EHHADH, ACSBG2, PHYH, ACOX3	925	24	14219	3.20248	1	0.726953	71.0905		*		0
GOTERM_BP_ALL	GO:0007033~vacuole organization	6	0.0457701	0.0666849	CLN3, TPP1, HEXA, HEXB, CLN5, IDUA	925	34	14219	2.71269	1	0.72484	71.1031		*		0
GOTERM_BP_ALL	GO:0045935~positive regulation of nucleobase, nucleoside, nucleotide and nucleic acid metabolic process	43	0.328019	0.0667133	ABLIM1, ABLIM2, HNF1B, CDX1, HNF1A, HTATIP2, ELF4, STAT5A, MITF, SFPI1, ZEB1, PRDM16, RFXANK, ZBTB38, PLAGL1, SLC11A1, NPAS2, S1PR1, MDFIC, POU2F3, GATA4, TEAD4, TSIX, SOX15, HSF4, TESC, LMX1B, MAML2, NPR1, AFF1, UBE2B, HMGA1, CDK2, DDIT3, PPARGC1B, HES1, OSM, HOXD9, ATF4, RNF6, EYA1, NFE2L2, BMP7	925	510	14219	1.29606	1	0.722769	71.119		*		0
GOTERM_BP_ALL	GO:0033036~macromolecule localization	71	0.541613	0.0668926	GNPTG, SLC27A1, RFT1, SEC31B, HNF1A, HEXA, STAT5A, HEXB, SORL1, FGF10, SYNGR1, SYNGR2, IMMP2L, TRIM3, APOE, STARD6, GRIN2C, TRAK1, AP3B2, RAB24, D230025D16RIK, JAKMIP1, KDELR3, RAMP2, MYO6, CD3G, RINT1, OPTN, CDK5, RAB11FIP5, RPAIN, NPC2, TIMM8A2, PSEN2, RAB17, RAB12, AKAP7, MYH7B, COPZ2, ABCA7, SNX9, ARFGAP3, TNRC18, APOC1, NXT2, SLC11A1, UEVLD, AP3M2, RAB11A, DOPEY2, SCARB1, 1500001M20RIK, SRGN…	925	902	14219	1.20998	1	0.72154	71.2186		*		0
GOTERM_BP_ALL	GO:0030001~metal ion transport	38	0.289877	0.0678518	STEAP4, SLC9A8, GM5134, ATP1B1, KCNC4, FTL1, SLC39A11, KCNAB2, SLC39A13, SFXN3, SFXN4, SFXN2, KCNIP2, TPCN2, KCNU1, SLC11A1, MCOLN1, SLC39A4, SCNN1A, SLC31A1, SLC12A6, SLC12A7, SLC12A8, SLC10A6, CACNG5, SLC24A6, TCN2, CDK2, SLC34A3, KCTD6, P2RX4, ACCN3, CATSPER2, PSEN2, KCTD18, SCN8A, SLC30A10, SCARA5	925	442	14219	1.32157	1	0.724582	71.7462		*		0
GOTERM_BP_ALL	GO:0031328~positive regulation of cellular biosynthetic process	46	0.350904	0.0679161	ABLIM1, ABLIM2, HNF1B, CDX1, HNF1A, HTATIP2, ELF4, STAT5A, MITF, SFPI1, ZEB1, PRDM16, RFXANK, ZBTB38, PLAGL1, SLC11A1, NOD2, NPAS2, S1PR1, MDFIC, POU2F3, GATA4, TEAD4, TSIX, SOX15, DAZL, HSF4, CD27, EIF2B5, TESC, LMX1B, MAML2, NPR1, AFF1, HMGA1, CDK2, DDIT3, PPARGC1B, FCGR3, HES1, OSM, HOXD9, ATF4, RNF6, NFE2L2, BMP7	925	552	14219	1.28099	1	0.722743	71.7812		*		0
GOTERM_BP_ALL	GO:0050707~regulation of cytokine secretion	4	0.0305134	0.0692791	NOD2, PYCARD, TNFRSF4, SRGN	925	15	14219	4.09917	1	0.727881	72.5143		*		0
GOTERM_BP_ALL	GO:0019439~aromatic compound catabolic process	4	0.0305134	0.0692791	ALDH1L1, EPHX2, IDO2, EPHX1	925	15	14219	4.09917	1	0.727881	72.5143		*		0
GOTERM_BP_ALL	GO:0030003~cellular cation homeostasis	16	0.122054	0.0693526	SLC9A8, CLN3, GNA15, TESC, FTL1, HEXB, TNNI3, SLC11A1, S1PR1, AQP11, APOE, MT2, MT1, SLC39A4, SCARA5, CLN5	925	152	14219	1.61809	1	0.726117	72.5534		*		0
GOTERM_BP_ALL	GO:0007292~female gamete generation	8	0.0610268	0.0694209	IMMP2L, REC8, HEXB, PAQR8, DAZL, DMC1, SOHLH2, YBX2	925	56	14219	2.19598	1	0.724334	72.5896		*		0
GOTERM_BP_ALL	GO:0006638~neutral lipid metabolic process	7	0.0533984	0.0694611	GPX1, INSIG1, APOC1, CAT, GPAT2, LIPC, PNPLA3	925	45	14219	2.39118	1	0.722413	72.6109		*		0
GOTERM_BP_ALL	GO:0006662~glycerol ether metabolic process	7	0.0533984	0.0694611	GPX1, INSIG1, APOC1, CAT, GPAT2, LIPC, PNPLA3	925	45	14219	2.39118	1	0.722413	72.6109		*		0
GOTERM_BP_ALL	GO:0051173~positive regulation of nitrogen compound metabolic process	44	0.335647	0.0704761	ABLIM1, ABLIM2, HNF1B, CDX1, HNF1A, HTATIP2, HPRT, ELF4, STAT5A, MITF, SFPI1, ZEB1, PRDM16, RFXANK, ZBTB38, PLAGL1, SLC11A1, NPAS2, S1PR1, MDFIC, POU2F3, GATA4, TEAD4, TSIX, SOX15, HSF4, TESC, LMX1B, MAML2, NPR1, AFF1, UBE2B, HMGA1, PPARGC1B, CDK2, DDIT3, HES1, OSM, HOXD9, ATF4, RNF6, EYA1, NFE2L2, BMP7	925	526	14219	1.28586	1	0.725637	73.1434		*		0
GOTERM_BP_ALL	GO:0032101~regulation of response to external stimulus	12	0.0915402	0.070639	GPX2, NTRK3, CLN3, GPX1, NOD2, S1PR1, CD59B, STAT5A, CFH, FGF10, AHSG, FCGR3	925	103	14219	1.7909	1	0.724381	73.2279		*		0
GOTERM_BP_ALL	GO:0050793~regulation of developmental process	47	0.358532	0.0711859	BMI1, LST1, HTATIP2, PDGFA, STAT5A, MITF, FGF10, ZEB1, KIT, PRDM16, AHSG, CDC42EP2, CDKN2A, INPP5J, MAPT, SEMA3F, GATA4, INSIG1, SOX15, IL2RG, HSF4, INPP5D, AXIN2, TLX2, CD27, SRGN, FN1, TESC, NLGN1, LPIN1, TCL1, TRADD, HES1, NTRK3, CRHR2, RNF6, EYA1, LAMA3, BGLAP-RS1, H2-OA, SFRP1, ULK1, BTG1, ID4, NFE2L2, BMP7, HDAC7	925	568	14219	1.27197	1	0.725128	73.5099		*		1
GOTERM_BP_ALL	GO:0007043~cell-cell junction assembly	3	0.022885	0.0712066	CD9, CLDN19, HDAC7	925	7	14219	6.58795	1	0.723151	73.5205		*		4
GOTERM_BP_ALL	GO:0006882~cellular zinc ion homeostasis	3	0.022885	0.0712066	MT2, MT1, SLC39A4	925	7	14219	6.58795	1	0.723151	73.5205		*		0
GOTERM_BP_ALL	GO:0048103~somatic stem cell division	3	0.022885	0.0712066	BMI1, HOXB4, CDKN2A	925	7	14219	6.58795	1	0.723151	73.5205		*		1
GOTERM_BP_ALL	GO:0032502~developmental process	197	1.50278	0.071644	CDX1, DZIP1, STAT5A, DYNC2LI1, PTPN22, RADIL, SOHLH2, CTTNBP2, S1PR1, APOE, AQP11, INSIG1, CCBE1, CCNA1, EIF2B5, CD3G, ZSCAN4E, ZSCAN4C, HES1, REC8, CATSPER2, MST1R, CHKB, MST1, ACSBG2, ACP5, SFPI1, NRN1, AHSG, HESX1, SEMA5A, ADRB3, LHX2, DMD, SPP1, SCD1, CML1, SMAD9, ROGDI, TNNI3, TNNI1, NTRK3, RNF6, SYNE2, SEMA6C, DMRTC2, SFRP1, BMP7, STEAP4, HNF1B, HNF1A, HTATIP2, MITF, ZEB1, GJA4, ASAH1, CKB,…	925	2743	14219	1.104	1	0.723338	73.7439		PRDM14		1
GOTERM_BP_ALL	GO:0006519~cellular amino acid and derivative metabolic process	27	0.205965	0.0745228	HPRT, CHKB, STAT5A, AMT, GOT1L1, ASNS, GGT1, AUH, GSS, LY6E, DMGDH, ALDH6A1, CLN3, BHMT2, ACY1, IDO2, HAL, NPR1, PADI4, CDO1, DDO, PADI1, PNPLA7, FABP3, LIPC, ADC, MYH7B	925	297	14219	1.39744	1	0.735762	75.1706		*		0
GOTERM_BP_ALL	GO:0001558~regulation of cell growth	11	0.0839118	0.0748901	NTRK3, RNF6, EI24, CDKN2A, ULK1, MAPT, KAZALD1, SEMA3F, NDUFA13, CAPRIN2, AHSG	925	92	14219	1.83794	1	0.735532	75.3472		*		4
GOTERM_BP_ALL	GO:0009605~response to external stimulus	52	0.396674	0.0749569	NG23, MASP2, FGF10, GPX1, NOD2, D17H6S56E-3, GRIN2C, SEMA3F, GATA4, CFH, SOX15, CLN3, C4A, ACADS, LY96, SAA3, DDIT3, LEFTY1, SIGIRR, C8G, C8B, UNC13D, F2, CTSB, PROS1, TRIML2, MBL2, LST1, MST1, KIT, C1S, TNFRSF4, AHSG, SLC11A1, ANXA8, RAC2, ADH1, RASGRP4, POU2F3, PYCARD, ENTPD2, FN1, EPHX2, FCGR3, CXCL17, VWF, GM5077, CD55, ACCN3, NUPR1, CMTM7, HDAC7	925	640	14219	1.24897	1	0.733842	75.3793		*		0
GOTERM_BP_ALL	GO:0051092~positive regulation of NF-kappaB transcription factor activity	5	0.0381417	0.0754547	IRAK1, NOD2, CARD9, MALT1, CAT	925	25	14219	3.07438	1	0.734259	75.6165		*		0
GOTERM_BP_ALL	GO:0046700~heterocycle catabolic process	7	0.0533984	0.0757078	ALDH1L1, HAL, IDO2, GM6907, GM4902, PDE8B, PDE8A, ENTPD2, D14ERTD668E	925	46	14219	2.3392	1	0.733491	75.7363		*		0
GOTERM_BP_ALL	GO:0010557~positive regulation of macromolecule biosynthetic process	44	0.335647	0.0773701	ABLIM1, ABLIM2, HNF1B, CDX1, HNF1A, HTATIP2, ELF4, STAT5A, MITF, SFPI1, ZEB1, PRDM16, RFXANK, ZBTB38, PLAGL1, SLC11A1, NPAS2, S1PR1, MDFIC, POU2F3, GATA4, TEAD4, TSIX, SOX15, DAZL, HSF4, CD27, EIF2B5, TESC, LMX1B, MAML2, AFF1, HMGA1, CDK2, DDIT3, PPARGC1B, FCGR3, HES1, OSM, HOXD9, ATF4, RNF6, NFE2L2, BMP7	925	530	14219	1.27616	1	0.739456	76.5094		*		0
GOTERM_BP_ALL	GO:0045941~positive regulation of transcription	40	0.305134	0.0776773	ABLIM1, ABLIM2, HNF1B, CDX1, HNF1A, HTATIP2, ELF4, STAT5A, MITF, SFPI1, ZEB1, PRDM16, RFXANK, ZBTB38, PLAGL1, SLC11A1, NPAS2, S1PR1, MDFIC, POU2F3, GATA4, TEAD4, TSIX, SOX15, HSF4, TESC, LMX1B, MAML2, AFF1, HMGA1, CDK2, DDIT3, PPARGC1B, HES1, OSM, HOXD9, ATF4, RNF6, NFE2L2, BMP7	925	475	14219	1.29448	1	0.738939	76.6497		*		0
GOTERM_BP_ALL	GO:0009891~positive regulation of biosynthetic process	46	0.350904	0.0778763	ABLIM1, ABLIM2, HNF1B, CDX1, HNF1A, HTATIP2, ELF4, STAT5A, MITF, SFPI1, ZEB1, PRDM16, RFXANK, ZBTB38, PLAGL1, SLC11A1, NOD2, NPAS2, S1PR1, MDFIC, POU2F3, GATA4, TEAD4, TSIX, SOX15, DAZL, HSF4, CD27, EIF2B5, TESC, LMX1B, MAML2, NPR1, AFF1, HMGA1, CDK2, DDIT3, PPARGC1B, FCGR3, HES1, OSM, HOXD9, ATF4, RNF6, NFE2L2, BMP7	925	557	14219	1.26949	1	0.737919	76.7402		*		0
GOTERM_BP_ALL	GO:0016044~membrane organization	25	0.190709	0.0781482	ABCA7, SORL1, CD9, SLC11A1, AP3B2, SCARB1, ELMOD2, LY75, SH3GL3, CLN3, MYO6, A4GALT, SIRPA, FCGR3, PLEKHF1, UNC13D, SYNE2, TIMM8A2, ULK1, VAMP2, CELA2A, SCARA5, SH3GL2, DNM1, EPN2	925	272	14219	1.41286	1	0.737249	76.8632		*		4
GOTERM_BP_ALL	GO:0051049~regulation of transport	26	0.198337	0.0801584	MBL2, SNCG, CASR, ICA1, LST1, HNF1A, SIRT4, FGF10, PFKM, CD63, TNFRSF4, SIRPA, CDK5, CPT1A, FCGR3, AHSG, OSM, SSTR5, SLC11A1, NOD2, CDKN2A, PYCARD, SCARB1, VAMP2, SRGN, EPN2	925	286	14219	1.39744	1	0.744585	77.7542		*		0
GOTERM_BP_ALL	GO:0045619~regulation of lymphocyte differentiation	8	0.0610268	0.0806838	BMI1, CDKN2A, H2-OA, STAT5A, IL2RG, ZEB1, INPP5D, CD27	925	58	14219	2.12026	1	0.74505	77.9816		*		1
GOTERM_BP_ALL	GO:0030516~regulation of axon extension	4	0.0305134	0.0813005	NTRK3, RNF6, MAPT, SEMA3F	925	16	14219	3.84297	1	0.745919	78.2458		*		1
GOTERM_BP_ALL	GO:0019886~antigen processing and presentation of exogenous peptide antigen via MHC class II	4	0.0305134	0.0813005	H2-OA, H2-EB1, IFI30, H2-AB1	925	16	14219	3.84297	1	0.745919	78.2458		*		0
GOTERM_BP_ALL	GO:0046849~bone remodeling	4	0.0305134	0.0813005	HNF1A, TPP1, MITF, ACP5	925	16	14219	3.84297	1	0.745919	78.2458		*		0
GOTERM_BP_ALL	GO:0009410~response to xenobiotic stimulus	4	0.0305134	0.0813005	GPX1, AHRR, GSTM4, CYP1A1	925	16	14219	3.84297	1	0.745919	78.2458		*		0
GOTERM_BP_ALL	GO:0002495~antigen processing and presentation of peptide antigen via MHC class II	4	0.0305134	0.0813005	H2-OA, H2-EB1, IFI30, H2-AB1	925	16	14219	3.84297	1	0.745919	78.2458		*		0
GOTERM_BP_ALL	GO:0006672~ceramide metabolic process	6	0.0457701	0.081379	CLN3, ST6GALNAC6, HEXA, HEXB, GALC, CERK	925	36	14219	2.56198	1	0.744382	78.2793		*		0
GOTERM_BP_ALL	GO:0046883~regulation of hormone secretion	6	0.0457701	0.081379	OSM, SSTR5, HNF1A, SIRT4, PFKM, CPT1A	925	36	14219	2.56198	1	0.744382	78.2793		*		0
GOTERM_BP_ALL	GO:0006732~coenzyme metabolic process	15	0.114425	0.0814251	MOCOS, ALDH1L1, EHHADH, BC016495, NADSYN1, MTHFSD, GGT1, PPCDC, GSS, ACSS1, MLYCD, IDH2, RPIA, SUCLA2, MYH7B	925	143	14219	1.61244	1	0.742707	78.2988		*		0
GOTERM_BP_ALL	GO:0030258~lipid modification	7	0.0533984	0.0822624	HACL1, GBGT1, EHHADH, ACSBG2, IP6K1, PHYH, ACOX3	925	47	14219	2.28943	1	0.744563	78.6519		*		0
GOTERM_BP_ALL	GO:0010975~regulation of neuron projection development	7	0.0533984	0.0822624	NTRK3, RNF6, INPP5J, ULK1, MAPT, SEMA3F, TLX2	925	47	14219	2.28943	1	0.744563	78.6519		*		1
GOTERM_BP_ALL	GO:0043410~positive regulation of MAPKKK cascade	7	0.0533984	0.0822624	OSM, ADRB3, NOD2, CARD9, KLB, FGF10, CD27	925	47	14219	2.28943	1	0.744563	78.6519		*		0
GOTERM_BP_ALL	GO:0006873~cellular ion homeostasis	24	0.18308	0.0843885	SLC9A8, CLN3, TESC, GNA15, FTL1, HEXA, HEXB, TNNI3, CDK5, MBP, CKB, CD9, SLC11A1, P2RX4, S1PR1, APOE, AQP11, GRIN2C, MT2, MT1, SLC39A4, SCARA5, CLN5, EIF2B5	925	261	14219	1.41351	1	0.751968	79.5243		*		0
GOTERM_BP_ALL	GO:0006778~porphyrin metabolic process	5	0.0381417	0.0847984	HNF1A, HEBP1, PPOX, RSAD1, MMAB	925	26	14219	2.95613	1	0.751885	79.6886		*		0
GOTERM_BP_ALL	GO:0033013~tetrapyrrole metabolic process	5	0.0381417	0.0847984	HNF1A, HEBP1, PPOX, RSAD1, MMAB	925	26	14219	2.95613	1	0.751885	79.6886		*		0
GOTERM_BP_ALL	GO:0043392~negative regulation of DNA binding	5	0.0381417	0.0847984	NOD2, CAT, TNFRSF4, DDIT3, SIGIRR	925	26	14219	2.95613	1	0.751885	79.6886		*		0
GOTERM_BP_ALL	GO:0002791~regulation of peptide secretion	5	0.0381417	0.0847984	SSTR5, HNF1A, SIRT4, PFKM, CPT1A	925	26	14219	2.95613	1	0.751885	79.6886		*		0
GOTERM_BP_ALL	GO:0051090~regulation of transcription factor activity	8	0.0610268	0.0866883	IRAK1, NOD2, CARD9, MALT1, CAT, TNFRSF4, DDIT3, SIGIRR	925	59	14219	2.08432	1	0.758014	80.43		*		0
GOTERM_BP_ALL	GO:0051641~cellular localization	53	0.404302	0.0887821	GNPTG, CEP72, HNF1B, HTATIP2, HNF1A, FAM3B, FGF10, ARHGAP17, SYNGR1, SYNGR2, IMMP2L, APOE, TRAK1, AP3B2, MCOLN1, D230025D16RIK, KDELR3, DYNC1I1, RAMP2, MYO6, OPTN, CDK5, NPC2, RPAIN, UNC13D, TIMM8A2, SLC37A2, VAMP2, MYH7B, COPZ2, SNX9, ARFGAP3, DSCR3, SLC11A1, AP3M2, LY6E, 1500001M20RIK, CD27, SRGN, HAP1, SEC61A2, TXNIP, MYO1A, GM8615, LIN7B, NLGN1, FCGR3, TRAF3IP2, PLEKHF1, SYNE1, TEX15, SYNE2, …	925	662	14219	1.23068	1	0.764765	81.2215		*		3
GOTERM_BP_ALL	GO:0060249~anatomical structure homeostasis	10	0.0762835	0.0891217	MTM1, PRDM14, HNF1A, TEX15, TPP1, DMD, ACP5, KLHL10, RTEL1, CD7	925	83	14219	1.85204	1	0.764349	81.347		PRDM14		0
GOTERM_BP_ALL	GO:0045580~regulation of T cell differentiation	7	0.0533984	0.0891221	BMI1, CDKN2A, H2-OA, STAT5A, IL2RG, ZEB1, CD27	925	48	14219	2.24173	1	0.762579	81.3472		*		1
GOTERM_BP_ALL	GO:0048638~regulation of developmental growth	6	0.0457701	0.089319	NTRK3, RNF6, ULK1, MAPT, SEMA3F, GATA4	925	37	14219	2.49274	1	0.761604	81.4196		*		1
GOTERM_BP_ALL	GO:0006750~glutathione biosynthetic process	3	0.022885	0.0909542	GSS, GGT1, MYH7B	925	8	14219	5.76446	1	0.766336	82.0106		*		0
GOTERM_BP_ALL	GO:0055069~zinc ion homeostasis	3	0.022885	0.0909542	MT2, MT1, SLC39A4	925	8	14219	5.76446	1	0.766336	82.0106		*		0
GOTERM_BP_ALL	GO:0045579~positive regulation of B cell differentiation	3	0.022885	0.0909542	STAT5A, IL2RG, INPP5D	925	8	14219	5.76446	1	0.766336	82.0106		*		1
GOTERM_BP_ALL	GO:0050792~regulation of viral reproduction	3	0.022885	0.0909542	MDFIC, OAS1B, OAS1A	925	8	14219	5.76446	1	0.766336	82.0106		*		0
GOTERM_BP_ALL	GO:0051702~interaction with symbiont	3	0.022885	0.0909542	GPX2, MBL2, GPX1	925	8	14219	5.76446	1	0.766336	82.0106		*		0
GOTERM_BP_ALL	GO:0008361~regulation of cell size	12	0.0915402	0.0918243	NTRK3, RNF6, EI24, CDKN2A, RASGRP4, ULK1, MAPT, SEMA3F, NDUFA13, CAPRIN2, AHSG, LEFTY1	925	108	14219	1.70799	1	0.767991	82.3179		*		4
GOTERM_BP_ALL	GO:0051239~regulation of multicellular organismal process	61	0.465329	0.0939103	BMI1, SLC27A1, SNCG, HTATIP2, PDGFA, STAT5A, MITF, FGF10, ZEB1, SYNGR1, NOD2, CDKN2A, APOE, GRIN2C, MAPT, SEMA3F, GATA4, SOX15, MYO6, CDK5, SIGIRR, HES1, CRHR2, EYA1, H2-OA, BTG1, PSEN2, NFE2L2, LST1, CTNND2, PRDM16, TNFRSF4, AHSG, ADRB3, SLC11A1, INPP5J, PYCARD, IL2RG, INPP5D, AXIN2, TLX2, SRGN, CD27, HRC, TESC, ICA1, CARD9, NLGN1, TNNI3, FCGR3, TRADD, NTRK3, RNF6, LAMA3, BGLAP-RS1, SFRP1, ULK1,…	925	778	14219	1.20525	1	0.774236	83.0344		*		0
GOTERM_BP_ALL	GO:0045995~regulation of embryonic development	4	0.0305134	0.0941483	LAMA3, FGF10, NFE2L2, BMP7	925	17	14219	3.61692	1	0.773428	83.1144		*		1
GOTERM_BP_ALL	GO:0042326~negative regulation of phosphorylation	5	0.0381417	0.0946763	INPP5K, INPP5J, PSEN2, BDKRB2, UBE2B	925	27	14219	2.84665	1	0.773711	83.2905		*		0
GOTERM_BP_ALL	GO:0042311~vasodilation	5	0.0381417	0.0946763	ADRB3, P2RX4, CTTNBP2, GPX1, APOE	925	27	14219	2.84665	1	0.773711	83.2905		*		0
GOTERM_BP_ALL	GO:0055067~monovalent inorganic cation homeostasis	6	0.0457701	0.0976446	SLC9A8, CLN3, SLC11A1, TESC, AQP11, CLN5	925	38	14219	2.42714	1	0.782886	84.2491		*		0
GOTERM_BP_ALL	GO:0046519~sphingoid metabolic process	6	0.0457701	0.0976446	CLN3, ST6GALNAC6, HEXA, HEXB, GALC, CERK	925	38	14219	2.42714	1	0.782886	84.2491		*		0
GOTERM_BP_ALL	GO:0050768~negative regulation of neurogenesis	6	0.0457701	0.0976446	RNF6, ULK1, SEMA3F, ID4, BMP7, TLX2	925	38	14219	2.42714	1	0.782886	84.2491		*		0
GOTERM_BP_ALL	GO:0051130~positive regulation of cellular component organization	13	0.0991685	0.098593	FMN1, NTRK3, CTTNBP2, MBL2, SLC11A1, NOD2, LST1, MAPT, FGF10, CD63, SIRPA, FCGR3, AHSG	925	122	14219	1.63799	1	0.784606	84.5442		*		1

## Sheet: Serum>2i
Category	Term	Count	%	PValue	Genes	List Total	Pop Hits	Pop Total	Fold Enrichment	Bonferroni	Benjamini	FDR		Acts on core network		Category	Category Key
GOTERM_BP_ALL	GO:0048731~system development	336	17.3733	3.96291e-27	DLC1, PTGS2, PDLIM7, CDX4, PGF, EDN1, PDLIM3, L1CAM, REST, CITED2, BDNF, SERPINE2, CHRNA9, CUL7, CUL1, TWIST1, INA, PHOX2A, ICOSL, ARC, RARG, PTPRF, GATM, EFNB3, TMIE, KIF5C, EFNB2, RXRG, MYH6, CTNNA1, MECOM, VASH1, BCL2L11, THY1, PLAUR, RPS19, TAGLN, JUN, MAPK3, LAMB1-1, LOC100047930, EFNA5, ADAMTS1, TGFB1I1, EXT1, DBN1, CDK5R1, ERBB3, PTH1R, DAG1, ADA, CD74, EPHB2, PFN1, TAL1, PVRL1, NUP50, BAI…	1363	2027	14219	1.72925	1.34065e-23	1.34065e-23	7.23138e-24		REST, MYCN, CHD7		1	N/A	0
GOTERM_BP_ALL	GO:0048856~anatomical structure development	348	17.9938	1.7833e-25	DLC1, PTGS2, PDLIM7, CDX4, PGF, EDN1, PDLIM3, L1CAM, REST, CITED2, ACTG1, BDNF, CHRNA9, SERPINE2, CUL7, CUL1, TWIST1, INA, PHOX2A, ICOSL, ARC, RARG, PTPRF, GATM, EFNB3, TMIE, KIF5C, EFNB2, RXRG, MYH6, CTNNA1, MECOM, VASH1, BCL2L11, THY1, PLAUR, RPS19, TAGLN, JUN, MAPK3, LAMB1-1, LOC100047930, EFNA5, ADAMTS1, TGFB1I1, EXT1, BIN1, DBN1, CDK5R1, ERBB3, PTH1R, DAG1, ADA, CD74, EPHB2, PFN1, TAL1, PVRL…	1363	2170	14219	1.67299	6.03291e-22	3.01646e-22	3.25411e-22		REST, MYCN, CHD7		1	Development and differentiaition	1
GOTERM_BP_ALL	GO:0007275~multicellular organismal development	386	19.9586	1.41387e-24	DLC1, PTGS2, PGF, L1CAM, REST, CITED2, SERPINE2, CUL7, CUL1, INA, PHOX2A, ICOSL, ARC, GATM, PTPRF, TMIE, KIF5C, RXRG, MYH6, CTNNA1, MECOM, BCL2L11, PLAUR, THY1, RPS19, TAGLN, JUN, MAPK3, ADAMTS1, ERBB3, PTH1R, HSPA1A, HSPA1B, PFN1, PVRL1, DNMT3L, DNMT3B, LFNG, UNC45B, ODC1, DNMT3A, CLGN, PKP2, BMP8B, BMP8A, GM98, FGF5, SLC23A1, STRA8, FRAT1, SPIB, MYC, HIST1H1B, GM5506, CFTR, MMP14, FLNB, GPR98, …	1363	2521	14219	1.5973	4.78311e-21	1.59437e-21	2.57997e-21		REST, MYCN, CHD7		1	Pluripotency	2
GOTERM_BP_ALL	GO:0032502~developmental process	407	21.0445	2.43817e-23	DLC1, PTGS2, PGF, L1CAM, REST, CITED2, ACTG1, SERPINE2, CUL7, CUL1, RAB27A, INA, PHOX2A, ICOSL, ARC, GATM, PTPRF, TMIE, KIF5C, RXRG, PTPRU, MYH6, CTNNA1, MECOM, BCL2L11, PLAUR, THY1, RPS19, TAGLN, JUN, MAPK3, ADAMTS1, ERBB3, PTH1R, HSPA1A, HSPA1B, PFN1, PVRL1, DNMT3L, PVRL2, DNMT3B, LFNG, UNC45B, ODC1, DNMT3A, CLGN, RGS2, PKP2, BMP8B, BMP8A, FGF5, GM98, SLC23A1, STRA8, FRAT1, SPIB, MYC, SH3PXD2B,…	1363	2743	14219	1.5479	8.24834e-20	2.06208e-20	4.44909e-20		REST, MYCN, CHD7		1	Proliferation and cell cycle	3
GOTERM_BP_ALL	GO:0007399~nervous system development	161	8.32472	9.20859e-18	DLC1, ENAH, LMO4, ARNT2, JAG2, L1CAM, CNP, REST, SLC7A5, TGFB1, CITED2, BDNF, SERPINE2, TIAM1, ROBO1, GATA3, GALR2, TWIST1, PHOX2A, EGFR, INA, IRS2, RET, C2CD3, EFNB3, PTPRF, PLXNB1, EFNB2, KIF5C, DLL3, MECOM, CTNNA1, FOXN4, THY1, SLITRK4, MIAT, PDE5A, MTAP1B, LAMB1-1, LOC100047930, EFNA5, NRSN1, SMARCA1, SLITRK5, IGSF9, DBN1, FGFR2, CDK5R1, FGFR3, ERBB3, SOX3, BEX1, TIMP2, SOX8, EPHB2, PFN1, NUP…	1363	854	14219	1.96671	3.11527e-14	6.23053e-15	1.68035e-14		REST		1	morphology	4
GOTERM_BP_ALL	GO:0030154~cell differentiation	246	12.7198	4.6931e-16	PDLIM7, PTGS2, PGF, EDN1, L1CAM, REST, CITED2, ACTG1, BDNF, SERPINE2, CUL7, TWIST2, TWIST1, RAB27A, PHOX2A, INA, EFNB3, EFNB2, KIF5C, PTPRU, MYH6, CTNNA1, THY1, RPS19, JUN, LAMB1-1, LOC100047930, EFNA5, TGFB1I1, BIN1, DBN1, CDK5R1, ERBB3, PTH1R, HSPA1A, HSPA1B, ADA, CD74, EPHB2, TAL1, LAMB3, PVRL2, LHX6, UNC45B, TDRD1, MDFI, COL18A1, BMP4, GNAT1, KLF7, BMP1, LGALS3, CREBBP, EN1, EPHA2, KDR, GNAT2…	1363	1569	14219	1.63563	1.50235e-12	2.50355e-13	8.10463e-13		REST		1	cell death	5
GOTERM_BP_ALL	GO:0048513~organ development	257	13.2885	6.04992e-16	DLC1, PTGS2, CDX4, PGF, EDN1, PDLIM3, CITED2, BDNF, CHRNA9, CUL7, CUL1, TWIST1, PHOX2A, ARC, RARG, GATM, TMIE, EFNB2, RXRG, MYH6, MECOM, VASH1, BCL2L11, THY1, PLAUR, RPS19, TAGLN, JUN, MAPK3, LAMB1-1, LOC100047930, ADAMTS1, TGFB1I1, EXT1, CDK5R1, ERBB3, PTH1R, DAG1, ADA, CD74, EPHB2, PFN1, TAL1, PVRL1, NUP50, PBRM1, LHX6, LFNG, UNC45B, MDFI, COL18A1, BMP4, GNAT1, ODC1, BMP1, CRIP2, SMAD7, EN1, EP…	1363	1663	14219	1.61218	1.87794e-12	2.6823e-13	1.0103e-12		MYCN, CHD7		1
GOTERM_BP_ALL	GO:0048869~cellular developmental process	253	13.0817	8.9868e-16	PDLIM7, PTGS2, PGF, EDN1, L1CAM, REST, CITED2, ACTG1, BDNF, SERPINE2, CUL7, TWIST2, TWIST1, RAB27A, PHOX2A, INA, EFNB3, EFNB2, KIF5C, PTPRU, MYH6, CTNNA1, THY1, RPS19, JUN, LAMB1-1, LOC100047930, EFNA5, TGFB1I1, BIN1, DBN1, CDK5R1, ERBB3, PTH1R, HSPA1A, HSPA1B, ADA, CD74, EPHB2, TAL1, LAMB3, PVRL2, LHX6, UNC45B, TDRD1, MDFI, COL18A1, BMP4, GNAT1, KLF7, BMP1, LGALS3, CREBBP, EN1, EPHA2, KDR, GNAT2…	1363	1636	14219	1.61328	3.00471e-12	3.75588e-13	1.62093e-12		REST		1
GOTERM_BP_ALL	GO:0009653~anatomical structure morphogenesis	188	9.72079	2.65961e-15	DLC1, FGF18, ENAH, PGF, LMO4, EDN1, GNA12, CRABP2, JAG2, L1CAM, CNP, MMP2, ZIC3, TGFB1, CITED2, ACTG1, WNT4, BDNF, LOC100048295, CUL7, CHRNA9, ROBO1, GATA3, CUL1, TWIST1, EGFR, RET, RARG, C2CD3, EFNB3, GATM, TMIE, EFNB2, KIF5C, DLL3, MYH6, MECOM, CTNNA1, STK4, JUNB, VASH1, BCL2L11, PLAUR, THY1, SLITRK4, MIAT, MAPK3, LAMB1-1, ZFP697, LOC100047930, ADAMTS1, EFNA5, TGFB1I1, EXT1, SLITRK5, FRAS1, FGF…	1363	1114	14219	1.76054	9.01412e-12	1.00153e-12	4.86278e-12		MYCN, CHD7		1
GOTERM_BP_ALL	GO:0009987~cellular process	1012	52.3268	1.59166e-14	JUB, LDHA, REST, USP51, AU015228, CUL7, SERPINE2, GRIN2D, CDH24, CUL1, RAB27A, INA, ARC, ICOSL, GATM, SRP54A, KIF5C, F8, MED14, MYH6, BTBD9, LPCAT4, THY1, GLUL, TIMM8A1, AQR, TAGLN, F5, JUN, MAPK3, ROR1, ABAT, HSD11B2, CACNB2, PFN1, SULT4A1, IL17B, ARG2, GCSH, ARNTL2, LFNG, DHX8, UBE2CBP, ACACA, GAS8, EMILIN2, RGS2, 9130019O22RIK, DUSP26, PKP2, DUSP27, ARF3, PKP4, GM98, FGF5, NUAK2, FOXA3, NUAK1,…	1363	9252	14219	1.14109	5.37091e-11	5.37093e-12	2.89657e-11		REST, CHD7		0
GOTERM_BP_ALL	GO:0009888~tissue development	119	6.15305	1.00104e-12	DLC1, FGF18, ENAH, PTGS2, FGF15, PGF, LMO4, EDN1, PDLIM3, JAG2, TGFB1, CITED2, WNT4, LOC100048295, TWIST1, EGFR, RET, ARC, C2CD3, RARG, GATM, RXRG, DLL3, MYH6, MECOM, JUNB, PLAUR, JUN, MAPK3, TGFB1I1, EXT1, FRAS1, FGFR2, CAV2, FGFR3, PTH1R, BMPR2, DAG1, ITGB1, TIMP3, PFN1, PPL, NUP50, OVOL1, NKX3-1, PLXND1, RUNX3, OTOP1, COL18A1, BMP4, BMP1, SMAD7, CACNA1S, EPHA2, SHANK3, KDR, SALL4, RBPJ, TCF15,…	1363	638	14219	1.94581	3.38668e-09	3.0788e-10	1.82675e-09		*		1
GOTERM_BP_ALL	GO:0048519~negative regulation of biological process	197	10.1861	1.22752e-10	DLC1, SNCB, PTGS2, CDX4, EDN1, FSTL3, REST, CITED2, BDNF, CHRNA7, TWIST2, TWIST1, PLD2, RARG, RCOR2, ZHX2, SKP2, CTNNA1, VASH1, THY1, GRB10, JUN, LAMB1-1, LOC100047930, ADAMTS1, TGFB1I1, LOC100047211, ERBB3, PTH1R, HSPA1A, HSPA1B, CD74, ADA, EPHB2, PFN1, PROCR, SPNB2, SPNB1, UBASH3A, DNMT3B, TDRD1, MDFI, BMP4, IKZF4, DNMT3A, KLF12, CREBBP, NOTCH3, RGS2, JAZF1, BCL6B, RBPJ, NUAK2, NFKB1, ZEB2, GLI…	1363	1326	14219	1.54987	4.1527e-07	3.46058e-08	2.23994e-07		REST		0
GOTERM_BP_ALL	GO:0022008~neurogenesis	98	5.06722	4.46484e-10	ENAH, JAG2, CNP, L1CAM, REST, TGFB1, BDNF, ROBO1, TIAM1, GALR2, TWIST1, PHOX2A, RET, EFNB3, PLXNB1, KIF5C, CTNNA1, THY1, FOXN4, SLITRK4, MIAT, LAMB1-1, MTAP1B, LOC100047930, EFNA5, SMARCA1, IGSF9, SLITRK5, CDK5R1, FGFR3, ERBB3, BEX1, TIMP2, EPHB2, LHX6, RUNX3, GNAT1, TRP53, BMP4, KLF7, BHLHE22, EN1, ITGA3, RGNEF, EPHA2, GNAT2, NOTCH3, CDKN1C, EPHA4, SEMA6A, GCM1, RBPJ, MYH10, GM98, FGF5, PAX6, GJ…	1363	537	14219	1.90382	1.51045e-06	1.16189e-07	8.14728e-07		REST		1
GOTERM_BP_ALL	GO:0009887~organ morphogenesis	105	5.42916	6.36729e-10	DLC1, FGF18, ENAH, PGF, LMO4, EDN1, JAG2, MMP2, TGFB1, ZIC3, WNT4, CHRNA9, CUL1, TWIST1, EGFR, RET, C2CD3, RARG, TMIE, EFNB2, BCL2L11, THY1, MIAT, LAMB1-1, MAPK3, ADAMTS1, TGFB1I1, FRAS1, FGFR2, FGFR3, SOX3, BMPR2, DAG1, SRF, EPHB2, PFN1, PVRL1, NUP50, NKX3-1, PLXND1, RUNX3, OTOP1, GNAT1, BMP4, MDFI, BHLHE22, SMAD7, EPHA2, SHANK3, GNAT2, TNFSF11, ITGA6, CSRNP1, TCF15, PAX6, GJA1, ZEB2, PRRX2, GLI…	1363	594	14219	1.84406	2.15405e-06	1.53861e-07	1.16188e-06		CHD7		1
GOTERM_BP_ALL	GO:0048699~generation of neurons	92	4.75698	7.73197e-10	ENAH, JAG2, PAX6, GJA1, L1CAM, CNP, REST, PTEN, GLI3, TGFB1, BDNF, METRN, SLC1A3, ROBO1, TIAM1, GALR2, NR2F6, POU4F2, RHOC, HHIP, NRG1, TUBB3, TWIST1, PHOX2A, RET, EGR2, EFNB3, MTAP2, PLXNB1, KIF5C, OTX2, STXBP1, CTNNA1, GPR98, THY1, SLIT3, FOXN4, SMO, SLITRK4, MIAT, LAMB1-1, MTAP1B, LOC100047930, EFNA5, NGFR, SMARCA1, SLITRK5, IGSF9, GAP43, CDK5R1, FGFR3, BEX1, ABI2, BRSK1, TIMP2, EPHB2, BCL2, G…	1363	497	14219	1.9311	2.61572e-06	1.74382e-07	1.4109e-06		REST		1
GOTERM_BP_ALL	GO:0035295~tube development	59	3.05067	1.13248e-09	DLC1, FGF18, ENAH, PGF, LMO4, EDN1, GJA1, ZEB2, GLI3, ZIC3, TGFB1, GLI1, SPRY2, WNT4, SLC23A1, BDNF, CASP8, HHIP, TWIST1, RET, C2CD3, CFTR, MMP14, BCL2L11, MYCN, DDR1, TNS3, ACVR2B, CFL1, ZFP697, LOC100047930, ZFPM2, FGFR2, SHROOM3, DAG1, BMPR2, SRF, SUFU, ADA, PFN1, BCL2, NUP50, GBX2, NKX3-1, PLXND1, TRAF4, ETV4, BMP4, CEBPA, TBX4, FZD3, SHANK3, FZD6, KDR, ID1, PHB2, GRLF1, GDF11, PBX1	1363	264	14219	2.33142	3.83117e-06	2.39449e-07	2.06651e-06		MYCN		1
GOTERM_BP_ALL	GO:0060429~epithelium development	60	3.10238	1.1773e-09	DLC1, ENAH, PTGS2, PGF, LMO4, PAX6, JAG2, GJA1, ZEB2, GLI3, TGFB1, WNT4, LOC100048295, CASP8, SEMA3C, TWIST1, EGFR, RET, C2CD3, RARG, MECOM, DDR1, EVPL, JUN, CFL1, TGFB1I1, FGFR2, FRAS1, SHROOM3, FGFR3, DAG1, SFN, SUFU, PFN1, BCL2, PPL, NUP50, TGM1, NKX3-1, TGM3, POU3F1, PLXND1, CAR2, ETV4, BMP4, COL18A1, PPHLN1, TBX4, FZD1, FZD3, FZD2, SHANK3, FZD6, KDR, ID1, PHB2, GRLF1, PBX1, ID3, RBPJ	1363	271	14219	2.3097	3.98278e-06	2.34282e-07	2.14829e-06		*		1
GOTERM_BP_ALL	GO:0048523~negative regulation of cellular process	176	9.10031	2.36775e-09	DLC1, SNCB, PTGS2, CDX4, RBM15B, EDN1, FSTL3, FOXO1, REST, CBX1, PNP, TGFB1, H19, CITED2, WNT4, BDNF, PACSIN1, EIF4EBP2, LOC100048295, GATA3, TWIST2, SPN, TWIST1, PLD2, RARG, ACTN4, RCOR2, PKIG, SOCS1, ZHX2, SKP2, MLXIPL, CTNNA1, PKIA, VASH1, THY1, GRB10, MTAP1A, JUN, MTAP1B, LAMB1-1, LOC100047930, TGFB1I1, CAV2, LOC100047211, FGFR3, ERBB3, PTH1R, BEX1, HSPA1A, CX3CL1, HSPA1B, TIMP2, ITGB1, ADA, …	1363	1192	14219	1.54032	8.01007e-06	4.45005e-07	4.32059e-06		REST		1
GOTERM_BP_ALL	GO:0007155~cell adhesion	98	5.06722	4.78484e-09	DLC1, CTNNAL1, JUB, NELL2, L1CAM, VCL, ADAM8, SPON2, CDH24, RET, PTPRF, MPDZ, BYSL, F8, PTPRU, CTNNA1, BCL2L11, BTBD9, THY1, F5, CD34, LAMB1-1, LAMC1, MFAP4, CDK5R1, ITGB3, CX3CL1, ITGB1, PVRL4, LAMB3, PVRL1, ITGB8, TRO, TEK, PVRL2, SSX2IP, COL18A1, LPP, EFS, ITGA3, CELSR2, PCDH17, EMILIN2, ITGA9, LAMA4, CASS4, ITGA6, ITGA5, PKP2, PKP4, ITGA7, CYFIP2, NRP2, AEBP1, CLSTN3, IGFBP7, CLDN6, BCAR1, CL…	1363	561	14219	1.82237	1.6187e-05	8.51954e-07	8.73121e-06		*		4
GOTERM_BP_ALL	GO:0022610~biological adhesion	98	5.06722	5.30331e-09	DLC1, CTNNAL1, JUB, NELL2, L1CAM, VCL, ADAM8, SPON2, CDH24, RET, PTPRF, MPDZ, BYSL, F8, PTPRU, CTNNA1, BCL2L11, BTBD9, THY1, F5, CD34, LAMB1-1, LAMC1, MFAP4, CDK5R1, ITGB3, CX3CL1, ITGB1, PVRL4, LAMB3, PVRL1, ITGB8, TRO, TEK, PVRL2, SSX2IP, COL18A1, LPP, EFS, ITGA3, CELSR2, PCDH17, EMILIN2, ITGA9, LAMA4, CASS4, ITGA6, ITGA5, PKP2, PKP4, ITGA7, CYFIP2, NRP2, AEBP1, CLSTN3, IGFBP7, CLDN6, BCAR1, CL…	1363	562	14219	1.81913	1.79409e-05	8.97054e-07	9.67729e-06		*		4
GOTERM_BP_ALL	GO:0048646~anatomical structure formation involved in morphogenesis	71	3.67115	1.05548e-08	DLC1, FGF18, ENAH, PGF, LMO4, EDN1, ZEB2, ANPEP, PTEN, MMP2, GLI3, CITED2, ACTG1, WNT4, HMOX1, GATA3, CASP8, GNPAT, TGFA, SOX18, TWIST1, CYR61, RET, EGR2, DLL3, MYH6, MMP14, JUNB, VASH1, BCL2L11, THY1, BBS2, CFL1, ADAMTS1, FGFR2, SHROOM3, BMPR2, EGLN1, CX3CL1, SRF, ITGB1, ADA, SUFU, PFN1, NUP50, GBX2, POU2F1, NKX3-1, PLCD1, SKIL, PLXND1, BMP4, COL18A1, TRP53, TBX4, FZD3, CAPN2, CACNA1S, EPHA2, SH…	1363	365	14219	2.02926	3.57064e-05	1.70033e-06	1.92601e-05		*		1
GOTERM_BP_ALL	GO:0030182~neuron differentiation	74	3.82627	3.98961e-08	ENAH, JAG2, PAX6, L1CAM, CNP, PTEN, GLI3, BDNF, SLC1A3, ROBO1, GALR2, NR2F6, POU4F2, NRG1, TUBB3, PHOX2A, RET, EGR2, EFNB3, MTAP2, OTX2, KIF5C, STXBP1, GPR98, THY1, SLIT3, FOXN4, SMO, SLITRK4, MIAT, LAMB1-1, MTAP1B, LOC100047930, EFNA5, NGFR, SMARCA1, SLITRK5, IGSF9, GAP43, CDK5R1, FGFR3, ABI2, BRSK1, EPHB2, BCL2, GBX2, ETV1, LHX6, ETV4, RUNX3, DCLK1, BMP4, GNAT1, KLK8, KLF7, BHLHE22, PTPRZ1, NFA…	1363	399	14219	1.93478	0.000134959	6.13492e-06	7.2801e-05		*		1
GOTERM_BP_ALL	GO:0035239~tube morphogenesis	41	2.11996	7.17546e-08	FGFR2, DLC1, ENAH, SHROOM3, PGF, LMO4, EDN1, DAG1, GJA1, ZEB2, GLI3, SRF, ZIC3, SUFU, TGFB1, SPRY2, PFN1, WNT4, BCL2, NUP50, CASP8, GBX2, NKX3-1, PLXND1, ETV4, TWIST1, BMP4, RET, C2CD3, FZD3, MMP14, BCL2L11, SHANK3, FZD6, KDR, MYCN, DDR1, PHB2, CFL1, GRLF1, PBX1	1363	171	14219	2.50127	0.000242716	1.05541e-05	0.000130935		MYCN		1
GOTERM_BP_ALL	GO:0007507~heart development	48	2.4819	1.60744e-07	DLC1, NRP2, FGF15, ERBB3, EDN1, PDLIM3, SOX4, GJA1, EGLN1, GLI3, TPM1, ITGB1, PTEN, SRF, SUFU, ZIC3, CITED2, MSX2, CHD7, CASP8, NKX3-1, SEMA3C, PBRM1, NRG1, COL11A1, NOX4, BMP4, C2CD3, SMAD7, HSPG2, MYH6, MECOM, COL5A1, SMO, ACVR2B, SALL4, ID2, PKP2, ID1, ZMIZ1, ZFP697, ZFPM2, EPOR, ADAMTS1, ID3, RBPJ, HDAC9, MYH10	1363	223	14219	2.24548	0.00054365	2.2658e-05	0.00029332		CHD7		1
GOTERM_BP_ALL	GO:0048468~cell development	99	5.11892	1.86026e-07	FGF18, ENAH, FGF15, EDN1, CNP, L1CAM, TGFB1, ACTG1, BDNF, WNT4, LOC100048295, ROBO1, DDX25, GALR2, RET, EFNB3, KIF5C, MYH6, THY1, SLITRK4, MIAT, LAMB1-1, MTAP1B, LOC100047930, EFNA5, IGSF9, SLITRK5, CAV2, HMGB2, CDK5R1, PTH1R, ITGB1, SOX8, EPHB2, PVRL2, LHX6, TDRD1, RUNX3, GNAT1, COL18A1, BMP4, KLF7, CREBBP, EN1, RGNEF, CACNA1S, EPHA2, KDR, GNAT2, CDKN1C, EPHA4, SEMA6A, RBPJ, MYH10, NRP2, GM98, P…	1363	611	14219	1.69031	0.000629127	2.51727e-05	0.000339453		*		1
GOTERM_BP_ALL	GO:0009790~embryonic development	106	5.48087	2.16444e-07	DLC1, ENAH, LMO4, ARNT2, CRABP2, GNA12, EDN1, JAG2, DLK1, CITED2, TOP1, WNT4, CHRNA9, TWIST1, EGFR, RET, C2CD3, RARG, GATM, TMIE, DLL3, MYH6, MECOM, JUNB, BCL2L11, ZFP697, TGFB1I1, EXT1, FGFR2, CDK5R1, BMPR2, ITGB1, SOX8, SRF, ADA, PFN1, ECE1, NUP50, DNMT3L, NKX3-1, SKIL, DNMT3B, OTOP1, TRP53, BMP4, MDFI, DNMT3A, EN1, EPHA2, SHANK3, GCM1, SALL4, SFRP2, TCF15, MYH10, PAX6, GJA1, ZEB2, PRRX2, LSR, …	1363	670	14219	1.65046	0.000731961	2.81623e-05	0.000394958		CHD7		1
GOTERM_BP_ALL	GO:0050793~regulation of developmental process	93	4.80869	2.83625e-07	GM98, FGF18, PGF, GNA12, PAX6, GJA1, REST, PNP, GLI3, TGFB1, GLI1, BDNF, WNT4, METRN, PLEKHB1, CUL7, TIAM1, POU4F2, RHOC, NRG1, TWIST2, TWIST1, SH3PXD2B, ZFP36, EGR2, PTGER4, FOXJ1, PLXNB1, CTNNA1, VASH2, JUNB, BCL2L11, VASH1, THY1, SMO, TCFL5, LCK, BMP2K, SPNA1, ADAMTS1, WNT9A, TGFB1I1, NGFR, AKAP2, CALCR, FGFR2, FGFR3, SHROOM3, ADORA2B, BEX1, CX3CL1, TIMP2, SRF, ITGB1, CD74, ADA, EPHB2, TAL1, B…	1363	568	14219	1.70808	0.000959044	3.55366e-05	0.000517548		REST		1
GOTERM_BP_ALL	GO:0002009~morphogenesis of an epithelium	40	2.06825	2.93399e-07	FRAS1, FGFR2, DLC1, ENAH, SHROOM3, FGFR3, PGF, LMO4, DAG1, JAG2, ZEB2, GLI3, TGFB1, SUFU, PFN1, WNT4, BCL2, NUP50, CASP8, NKX3-1, SEMA3C, PLXND1, CAR2, ETV4, TWIST1, BMP4, EGFR, RET, RARG, C2CD3, TBX4, FZD3, SHANK3, FZD6, DDR1, PHB2, CFL1, GRLF1, PBX1, TGFB1I1	1363	173	14219	2.41205	0.000992075	3.54482e-05	0.000535382		*		1
GOTERM_BP_ALL	GO:0048666~neuron development	57	2.94726	3.13128e-07	ENAH, PAX6, L1CAM, CNP, GLI3, PTEN, BDNF, SLC1A3, ROBO1, GALR2, NR2F6, POU4F2, RET, EGR2, EFNB3, MTAP2, KIF5C, STXBP1, GPR98, THY1, SLIT3, SLITRK4, MIAT, MTAP1B, LAMB1-1, LOC100047930, EFNA5, NGFR, IGSF9, SLITRK5, GAP43, CDK5R1, ABI2, EPHB2, BCL2, GBX2, ETV1, LHX6, ETV4, RUNX3, DCLK1, GNAT1, KLF7, KLK8, PTPRZ1, NFASC, EN1, LMX1A, RGNEF, GNAT2, CDKN1C, SEMA6A, EPHA4, PPP1R9A, PHGDH, PBX3, MYH10	1363	292	14219	2.03641	0.00105875	3.65274e-05	0.000571384		*		1
GOTERM_BP_ALL	GO:0048522~positive regulation of cellular process	181	9.35884	3.31932e-07	FGF18, S100A6, FGF15, PGF, FGF17, EDN1, ARNT2, TLR2, FOXO1, EIF5A, TLR3, L1CAM, PNP, ZIC3, TGFB1, CTNNBL1, CITED2, BDNF, LOC100048295, TIAM1, GATA3, GPR44, SPN, RAB27A, EGFR, IRS2, ICOSL, RARG, ACTN4, PLXNB1, SKP2, MLXIPL, RXRG, MED14, TCFAP2E, MECOM, CTNNA1, VASH2, JUNB, BCL2L11, THY1, TNS3, ZFP462, JUN, LAMB1-1, CDCA7L, SMARCA1, FGFR2, HMGB2, CDK5R1, FGFR3, ADORA2B, PTH1R, ST8SIA1, BEX1, BMPR2,…	1363	1320	14219	1.43047	0.00112229	3.74301e-05	0.000605695		MYCN		0
GOTERM_BP_ALL	GO:0042127~regulation of cell proliferation	89	4.60186	3.39785e-07	DLC1, FGF5, FGF18, E2F3, FOSL2, FGF15, PTGS2, E2F7, FGF17, EDN1, PAX6, JAG2, FOXO1, PRRX2, PTEN, PNP, GLI3, TGFB1, GLI1, H19, SPRY2, BDNF, HMOX1, GATA3, TGFA, MYC, LTB, SPN, EGFR, ICOSL, IRS2, RARG, FOXJ1, RASIP1, MECOM, CTNNA1, VASH2, VASH1, MYCN, SMO, TNS3, DDR1, TCFL5, CCND2, ZMIZ1, JUN, HIPK2, LOC100047930, CDCA7L, NGFR, FGFR2, CAV2, FGFR3, PTH1R, ST8SIA1, BEX1, CNTFR, SFN, TIMP2, ITGB1, ADA,…	1363	538	14219	1.72576	0.00114883	3.70797e-05	0.000620025		MYCN		3
GOTERM_BP_ALL	GO:0006928~cell motion	67	3.46432	3.41908e-07	NRP2, JUB, ENAH, FGF15, BCAR1, PAX6, GJA1, ZEB2, L1CAM, PTEN, GLI3, TGFB1, BDNF, ROBO1, RSPH4A, SEMA3C, POU4F2, CHRNA7, NRG1, TWIST1, EGFR, RET, EGR2, EFNB3, FOXJ1, KIF5C, MMP14, SLIT3, SMO, TNS3, CD34, CFL1, EFNA5, LAMC1, NGFR, GAP43, CDK5R1, ABI2, DNAHC11, CX3CL1, SRF, ITGB1, EPHB2, IL17B, GBX2, ETV1, LHX6, ETV4, RUNX3, DCLK1, KLF7, VAV3, PODXL, ATP1A3, NFASC, ITGA3, LMX1A, GAS8, KDR, SEMA6A, E…	1363	367	14219	1.9045	0.00115601	3.61454e-05	0.000623899		*		3
GOTERM_BP_ALL	GO:0048729~tissue morphogenesis	49	2.53361	4.75016e-07	FRAS1, DLC1, FGFR2, ENAH, SHROOM3, FGFR3, PGF, LMO4, DAG1, BMPR2, JAG2, ZEB2, EGLN1, GLI3, TPM1, SUFU, TGFB1, PFN1, WNT4, BCL2, NUP50, CASP8, NKX3-1, SEMA3C, PLXND1, COL11A1, CAR2, ETV4, RUNX3, TWIST1, BMP4, EGFR, RET, C2CD3, RARG, SMAD7, TBX4, FZD3, EPHA2, SHANK3, FZD6, DDR1, PHB2, CFL1, GRLF1, PBX1, NGFR, TGFB1I1, WNT7A	1363	238	14219	2.14779	0.00160569	4.86952e-05	0.000866789		*		1
GOTERM_BP_ALL	GO:0007242~intracellular signaling cascade	133	6.87694	7.44862e-07	CTNNAL1, ADCY1, ADCY2, ADCY7, FGF14, THOP1, EDN1, GNA12, ADCY6, RASGEF1B, RRAD, FGF13, RGL1, DIRAS1, EIF4EBP2, TIAM1, GPR44, SPRED2, RAPGEF5, SPRED3, RAPGEF4, RAB25, ERAS, SPRED1, RAB27A, RET, RARG, SOCS1, PSD3, RXRG, TNS3, PLCE1, RND1, REM2, RAB15, RAB13, SPATA13, LRRK1, FGFR3, ADORA2B, PTH1R, AKAP13, RIMS2, CD74, PLCH2, ARHGDIA, TEC, GNAT1, TRP53, MDFI, CNKSR2, CNKSR1, GPR155, VAV3, RASEF, TRIO…	1363	915	14219	1.51636	0.0025167	7.4111e-05	0.00135919		*		0
GOTERM_BP_ALL	GO:0001944~vasculature development	50	2.58532	8.77618e-07	FGF18, PGF, CDX4, EDN1, GJA1, FOXO1, ANPEP, PRRX2, MMP2, PTEN, CITED2, LOC100048295, CUL7, HMOX1, CASP8, TGFA, SEMA3C, SOX18, CYR61, EFNB2, MMP14, JUNB, VASH1, THY1, SMO, ZMIZ1, ZFP697, ZFPM2, FGFR2, CX3CL1, SRF, CHD7, GBX2, PLCD1, PLXND1, COL18A1, BMP4, SMAD7, TBX4, COL5A1, EPHA2, KDR, ANXA2, DLX3, LAMA4, ID1, ECSCR, ITGA7, HBEGF, RBPJ	1363	250	14219	2.08643	0.00296458	8.48245e-05	0.00160143		CHD7		1
GOTERM_BP_ALL	GO:0007167~enzyme linked receptor protein signaling pathway	53	2.74043	1.02085e-06	FGF18, FGF5, LTBP1, FGF15, BCAR1, FGF17, FOXO1, CLNK, PTEN, TGFB1, EIF4EBP2, TIAM1, TGFA, GHR, EGFR, IRS2, RET, EFNB3, STXBP4, PTPRN, FLNA, DDR1, GRB10, ACVR2B, HIPK2, ROR1, AKAP2, FGFR2, FGFR3, ERBB3, BEX1, BMPR2, EPHB2, MSX2, SPNB2, TEK, SKIL, BMP4, TRP53, SMAD7, SMAD6, FLT4, EPHA1, EPHA2, KDR, EPHA4, ID1, CSRNP1, HBEGF, PTPN1, BMP8B, BMP6, BMP8A	1363	273	14219	2.02529	0.0034476	9.59274e-05	0.0018628		*		0
GOTERM_BP_ALL	GO:0031175~neuron projection development	45	2.32678	1.38216e-06	CDK5R1, ENAH, PAX6, ABI2, L1CAM, CNP, GLI3, PTEN, EPHB2, BDNF, ROBO1, BCL2, GALR2, GBX2, POU4F2, ETV1, ETV4, DCLK1, RUNX3, KLK8, KLF7, EGR2, EFNB3, MTAP2, PTPRZ1, KIF5C, STXBP1, NFASC, LMX1A, RGNEF, SLIT3, SEMA6A, EPHA4, PPP1R9A, SLITRK4, LAMB1-1, MTAP1B, PHGDH, LOC100047930, EFNA5, NGFR, IGSF9, SLITRK5, GAP43, MYH10	1363	218	14219	2.15342	0.00466493	0.000126366	0.00252208		*		1
GOTERM_BP_ALL	GO:0009792~embryonic development ending in birth or egg hatching	72	3.72285	2.13764e-06	DLC1, ENAH, LMO4, ARNT2, GNA12, EDN1, PAX6, GJA1, ZEB2, DLK1, PRRX2, GLI3, CITED2, ANKRD11, CASP8, COL11A1, TWIST1, CYR61, EGFR, C2CD3, GM5506, DLL3, MYH6, MECOM, JUNB, BCL2L11, SMO, ZMIZ1, CFL1, ZFPM2, WNT9A, FGFR2, SHROOM3, EGLN1, SRF, SOX8, TPM1, ITGB1, ADA, SUFU, PFN1, CHD7, ECE1, NUP50, DNMT3L, GBX2, NKX3-1, APBA2, ETNK2, PLCD1, SKIL, ACSL4, ENO1, BMP4, MDFI, CEBPA, TRP53, HSPG2, EN1, FZD3, …	1363	425	14219	1.76733	0.00720555	0.000190288	0.00390061		CHD7		1
GOTERM_BP_ALL	GO:0001568~blood vessel development	48	2.4819	2.42143e-06	FGFR2, FGF18, CDX4, PGF, EDN1, GJA1, FOXO1, ANPEP, CX3CL1, PRRX2, SRF, MMP2, PTEN, CITED2, LOC100048295, CHD7, CUL7, HMOX1, CASP8, GBX2, SEMA3C, TGFA, SOX18, PLCD1, PLXND1, CYR61, COL18A1, BMP4, SMAD7, TBX4, MMP14, JUNB, EPHA2, COL5A1, VASH1, KDR, THY1, ANXA2, DLX3, SMO, LAMA4, ZMIZ1, ITGA7, ECSCR, ZFP697, HBEGF, ZFPM2, RBPJ	1363	244	14219	2.05222	0.00815824	0.000210022	0.00441844		CHD7		1
GOTERM_BP_ALL	GO:0030030~cell projection organization	58	2.99897	2.64242e-06	JUB, ENAH, PAX6, L1CAM, CNP, GLI3, PTEN, VCL, BDNF, ROBO1, GALR2, POU4F2, TUBB4, C2CD3, EGR2, EFNB3, FOXJ1, MTAP2, KIF5C, STXBP1, GPR98, SLIT3, BBS2, SLITRK4, PRDX6, CFL1, MTAP1B, LAMB1-1, LOC100047930, EFNA5, NGFR, IGSF9, SLITRK5, GAP43, CDK5R1, ABI2, EPHB2, BCL2, GBX2, ETV1, ETV4, RUNX3, DCLK1, KLF7, KLK8, VAV3, PTPRZ1, NFASC, LMX1A, RGNEF, SEMA6A, EPHA4, CORO1A, PPP1R9A, ITGA6, CAPG, PHGDH, MY…	1363	319	14219	1.89675	0.00889947	0.000223458	0.00482168		*		1
GOTERM_BP_ALL	GO:0043009~chordate embryonic development	71	3.67115	2.99324e-06	DLC1, ENAH, LMO4, ARNT2, GNA12, EDN1, PAX6, GJA1, ZEB2, DLK1, PRRX2, GLI3, CITED2, ANKRD11, CASP8, COL11A1, TWIST1, CYR61, EGFR, C2CD3, GM5506, DLL3, MYH6, MECOM, JUNB, BCL2L11, SMO, ZMIZ1, CFL1, ZFPM2, WNT9A, FGFR2, SHROOM3, EGLN1, SRF, SOX8, TPM1, ITGB1, ADA, SUFU, PFN1, CHD7, ECE1, NUP50, DNMT3L, GBX2, NKX3-1, APBA2, ETNK2, PLCD1, SKIL, ENO1, BMP4, MDFI, CEBPA, TRP53, HSPG2, EN1, FZD3, CAPN2, …	1363	421	14219	1.75934	0.010075	0.000246948	0.00546181		CHD7		1
GOTERM_BP_ALL	GO:0006357~regulation of transcription from RNA polymerase II promoter	95	4.9121	3.07244e-06	RAI1, FOXK1, CDX4, NR6A1, ARNT2, PAX6, FOXO1, NFKB1, TGFB1, ZIC3, CITED2, GLI1, KCNIP3, LOC100048295, LBH, GATA3, PAX8, POU4F2, FOSL1, MYC, TWIST2, ATF7IP, EGR2, RARG, FOXJ1, SOX11, PKIG, OTX2, ZHX2, MLXIPL, RXRG, TLE4, MED14, TLE1, IRF2BP1, TCFAP2E, MECOM, PKIA, JMY, SMO, ZFP462, JUN, ZMIZ1, HIPK2, ZFPM2, LCOR, SUPT6H, HMGB2, MTDH, UBE3A, SOX4, SOX7, SRF, ARID2, SOX8, SUFU, PFN1, TAL1, NPAS1, TC…	1363	616	14219	1.60885	0.0103403	0.000247448	0.00560634		*		0
GOTERM_BP_ALL	GO:0030029~actin filament-based process	38	1.96484	3.47499e-06	DLC1, ENAH, LOC100047211, SHROOM3, PDLIM7, SHROOM4, NUAK2, BCAR1, PDLIM3, FHL3, ITGB1, SRF, ESPN, ACTG1, PFN1, ARHGAP6, PRR5, MYL6B, FAT1, BCL2, CNN2, CNN1, ARHGAP8, EHD2, FMNL2, ACTN4, FOXJ1, ARHGEF17, MYH6, FLNC, FLNA, PPP1R9A, CORO1A, LIMCH1, CFL1, MYH14, DBN1, AKAP2, MYH10	1363	176	14219	2.25239	0.0116871	0.000273356	0.00634084		*		4
GOTERM_BP_ALL	GO:0007411~axon guidance	26	1.34436	3.81615e-06	ENAH, CDK5R1, PAX6, L1CAM, GLI3, EPHB2, BDNF, ROBO1, GBX2, POU4F2, ETV1, ETV4, RUNX3, KLF7, EGR2, EFNB3, KIF5C, NFASC, LMX1A, SLIT3, EPHA4, SEMA6A, EFNA5, NGFR, GAP43, MYH10	1363	98	14219	2.76771	0.0128271	0.000293367	0.00696334		*		0
GOTERM_BP_ALL	GO:0010646~regulation of cell communication	113	5.84281	3.89309e-06	FGF18, EDN1, FSTL3, RASGEF1B, TLR3, L1CAM, RGL1, CITED2, SYP, BDNF, WNT4, TIAM1, GPR44, SPRED2, RAPGEF5, SPRED3, CHRNA7, RAPGEF4, SPRED1, PLD2, C2CD3, SOCS1, PSD3, SKP2, CTNNA1, THY1, GRB10, PLCE1, ARRB1, SPATA13, FGFR2, FGD2, FGFR3, SOX4, AKAP13, TIMP2, ADA, CD74, EPHB2, DOCK2, ECE1, NKX3-1, UBASH3A, SKIL, FGD5, TRP53, MDFI, CNKSR2, VAV3, SMAD7, TRIO, RGNEF, TNFSF11, RGS2, TMOD2, GRK5, SH3RF1, G…	1363	771	14219	1.52896	0.013084	0.000292631	0.00710373		*		0
GOTERM_BP_ALL	GO:0060562~epithelial tube morphogenesis	28	1.44778	4.2335e-06	FGFR2, DLC1, ENAH, SHROOM3, PGF, LMO4, DAG1, ZEB2, GLI3, TGFB1, SUFU, PFN1, WNT4, BCL2, CASP8, NUP50, ETV4, TWIST1, BMP4, RET, FZD3, SHANK3, FZD6, DDR1, PHB2, CFL1, GRLF1, PBX1	1363	111	14219	2.63153	0.0142199	0.000311298	0.00772485		*		1
GOTERM_BP_ALL	GO:0000902~cell morphogenesis	56	2.89555	4.44645e-06	ENAH, PAX6, L1CAM, CNP, GLI3, TGFB1, WNT4, BDNF, SLC1A3, ROBO1, POU4F2, NRG1, EGFR, C2CD3, EGR2, EFNB3, FOXJ1, KIF5C, STXBP1, CTNNA1, STK4, SLIT3, BBS2, SLITRK4, CFL1, LOC100047930, EFNA5, NGFR, SLITRK5, GAP43, CDK5R1, SHROOM3, SHROOM4, BRSK1, EPHB2, DOCK2, FAT1, BCL2, GBX2, ETV1, ETV4, RUNX3, DCLK1, NOX4, COL18A1, KLK8, KLF7, PTPRZ1, NFASC, LMX1A, RGNEF, SEMA6A, EPHA4, ID1, RBPJ, MYH10	1363	309	14219	1.89061	0.0149298	0.000319999	0.00811341		*		1
GOTERM_BP_ALL	GO:0048518~positive regulation of biological process	194	10.031	4.8433e-06	S100A6, PGF, EDN1, L1CAM, CITED2, BDNF, CHRNA7, RAB27A, ICOSL, RARG, RXRG, SKP2, MED14, CTNNA1, MECOM, VASH2, BCL2L11, THY1, ZFP462, JUN, LAMB1-1, CDCA7L, CDK5R1, PTH1R, CD74, ADA, EPHB2, TAL1, BMP4, COL18A1, ODC1, KLF6, KLF7, UTF1, KLF12, CRIP2, MAML1, CREBBP, CIDEB, KDR, ETS1, CSRNP1, TMOD2, RBPJ, GM98, FGF5, BCAR1, GJA1, ZEB2, NFKB1, PTEN, GLI3, GLI1, TGFA, MYC, CYR61, GHR, SH3PXD2B, ATF7IP, R…	1363	1493	14219	1.35555	0.0162514	0.000341294	0.0088375		MYCN, CHD7		0
GOTERM_BP_ALL	GO:0007154~cell communication	74	3.82627	6.93875e-06	SYT1, GM98, LDHA, NUAK2, SYT4, FOXA3, JAG2, GJA1, 1300014I06RIK, ILDR2, VGF, TGFB1, GLI1, SYP, BDNF, WNT4, HMOX1, GRIN2D, GNPAT, CHRNA7, RAPGEF4, SV2A, NRG1, FOSL1, SH3PXD2B, PLD2, EGR2, SLC25A4, NRXN2, UGT8A, STXBP1, CACNG4, RPS6KC1, STX1B, GPR98, ZCCHC14, SMO, ACVR2B, ARHGAP33, GRM6, ABAT, SNX12, NCAN, FGFR2, FRAS1, KCNMB4, CPLX1, ADORA2B, CACNB2, RIMS2, MIP, SYN1, POU2F1, APBA2, POU3F1, SNX24,…	1363	455	14219	1.69665	0.0232005	0.000478944	0.0126608		*		0
GOTERM_BP_ALL	GO:0021915~neural tube development	23	1.18925	7.36477e-06	DLC1, BMP4, ENAH, SHROOM3, C2CD3, LMO4, PAX6, ZEB2, EN1, FZD3, GLI3, SUFU, EPHA2, FZD6, PFN1, SMO, CFL1, NUP50, CASP8, GBX2, PHGDH, GRLF1, TWIST1	1363	83	14219	2.89083	0.0246073	0.000498178	0.0134381		*		1
GOTERM_BP_ALL	GO:0010629~negative regulation of gene expression	68	3.51603	8.82507e-06	FOXK1, CDX4, RBM15B, NR6A1, HR, ZEB2, NFKB1, CBX1, REST, GLI3, TGFB1, CITED2, KCNIP3, LOC100048295, POU4F2, NRG1, MYC, TWIST2, KHDRBS1, ATF7IP, RARG, CTBP2, RCOR2, FOXJ1, PKIG, ZHX2, SKP2, MLXIPL, TLE4, TLE1, IRF2BP1, PKIA, PURB, MXD4, HIPK2, ZFPM2, LCOR, MTDH, LIN28A, LIN28B, SUFU, SRRT, NPAS1, OVOL1, POU2F1, SKIL, DNMT3B, TDRD1, MDFI, BMP4, CEBPA, TRP53, IKZF4, DNMT3A, EHMT1, KLF12, JARID2, FZD…	1363	410	14219	1.73021	0.0294141	0.000585228	0.0161025		REST		0
GOTERM_BP_ALL	GO:0048514~blood vessel morphogenesis	40	2.06825	9.90944e-06	FGFR2, FGF18, PGF, EDN1, GJA1, ANPEP, CX3CL1, PRRX2, PTEN, SRF, CITED2, LOC100048295, CUL7, HMOX1, CASP8, GBX2, TGFA, SEMA3C, SOX18, PLCD1, PLXND1, CYR61, COL18A1, BMP4, SMAD7, TBX4, MMP14, JUNB, EPHA2, VASH1, KDR, THY1, ANXA2, SMO, ZMIZ1, ECSCR, ITGA7, HBEGF, ZFPM2, RBPJ	1363	198	14219	2.1075	0.0329681	0.000644481	0.0180809		*		1
GOTERM_BP_ALL	GO:0007409~axonogenesis	35	1.80972	1.01936e-05	CDK5R1, ENAH, PAX6, CNP, L1CAM, GLI3, EPHB2, BDNF, ROBO1, BCL2, GBX2, ETV1, POU4F2, ETV4, DCLK1, RUNX3, KLF7, EGR2, EFNB3, PTPRZ1, KIF5C, STXBP1, NFASC, LMX1A, RGNEF, SLIT3, SEMA6A, EPHA4, SLITRK4, LOC100047930, EFNA5, NGFR, SLITRK5, GAP43, MYH10	1363	163	14219	2.24003	0.0338972	0.000650449	0.0185992		*		1
GOTERM_BP_ALL	GO:0007423~sensory organ development	48	2.4819	1.0415e-05	FGFR2, FGFR3, EDN1, PAX6, JAG2, ABI2, PRRX2, NHS, GLI3, TGFB1, EPHB2, MIP, SPRY2, BDNF, LOC100048295, CHD7, PVRL1, CHRNA9, BCL2, POU2F1, GBX2, POU4F2, SKIL, COL8A2, MYC, COL11A1, OTOP1, BMP4, GNAT1, RARG, BHLHE22, TMIE, OTX2, FZD3, CACNA1S, GPR98, BCL2L11, FZD6, THY1, GNAT2, DDR1, MIAT, GRLF1, LRP6, GDF11, NEUROD1, TCF15, MYH10	1363	257	14219	1.94841	0.0346207	0.000652271	0.0190032		CHD7		1
GOTERM_BP_ALL	GO:0009966~regulation of signal transduction	98	5.06722	1.17381e-05	FGF18, RASGEF1B, FSTL3, TLR3, L1CAM, RGL1, CITED2, WNT4, TIAM1, GPR44, SPRED2, SPRED3, RAPGEF5, RAPGEF4, SPRED1, PLD2, C2CD3, SOCS1, PSD3, SKP2, CTNNA1, THY1, PLCE1, GRB10, ARRB1, SPATA13, FGFR2, FGD2, FGFR3, SOX4, AKAP13, TIMP2, CD74, ADA, DOCK2, ECE1, NKX3-1, UBASH3A, SKIL, FGD5, TRP53, MDFI, CNKSR2, VAV3, SMAD7, TRIO, RGNEF, TNFSF11, RGS2, TMOD2, GRK5, SH3RF1, PREX2, ZEB2, PRRX2, PTEN, SPRY4, …	1363	661	14219	1.54667	0.0389322	0.000721745	0.0214171		*		0
GOTERM_BP_ALL	GO:0051252~regulation of RNA metabolic process	191	9.8759	1.23986e-05	CDX4, RBM15B, ZFP334, ARNT2, FOXO1, REST, CBX1, ZIC3, TGFB1, 1700020N01RIK, CITED2, GATA1, ZFP94, LOC100048295, ZFP473, GATA3, CREB3L1, TWIST2, TWIST1, PHOX2A, RARG, PKIG, ZHX2, ZFP628, MLXIPL, RXRG, MTA1, MED14, TCFAP2E, MECOM, PKIA, JUNB, FOXN3, FOXN4, ZFP74, ZFP462, JUN, ZFP790, ZIM1, LOC100047930, SMARCA1, SUPT6H, HMGB2, ZFP560, SOX4, SOX7, ZFP764, MAPKAPK2, LIN28A, ZFP619, LIN28B, SOX8, SRF,…	1363	1488	14219	1.33907	0.0410773	0.000748735	0.0226222		REST, MYCN		0
GOTERM_BP_ALL	GO:0032989~cellular component morphogenesis	60	3.10238	1.26886e-05	ENAH, PAX6, L1CAM, CNP, GLI3, TGFB1, ACTG1, WNT4, BDNF, SLC1A3, ROBO1, GNPAT, POU4F2, NRG1, EGFR, C2CD3, EGR2, EFNB3, FOXJ1, KIF5C, STXBP1, MYH6, CTNNA1, STK4, SLIT3, BBS2, SLITRK4, CFL1, LOC100047930, EFNA5, NGFR, SLITRK5, GAP43, CDK5R1, SHROOM3, SHROOM4, BRSK1, ITGB1, EPHB2, DOCK2, FAT1, BCL2, GBX2, ETV1, ETV4, RUNX3, DCLK1, NOX4, COL18A1, KLF7, KLK8, PTPRZ1, NFASC, LMX1A, RGNEF, SEMA6A, EPHA4,…	1363	351	14219	1.78327	0.0420177	0.000752803	0.0231512		*		1
GOTERM_BP_ALL	GO:0030036~actin cytoskeleton organization	35	1.80972	1.34045e-05	DLC1, ENAH, LOC100047211, SHROOM3, PDLIM7, SHROOM4, NUAK2, BCAR1, PDLIM3, FHL3, ITGB1, SRF, ESPN, ACTG1, PFN1, ARHGAP6, PRR5, FAT1, BCL2, CNN2, CNN1, ARHGAP8, EHD2, FMNL2, ACTN4, FOXJ1, ARHGEF17, MYH6, FLNA, PPP1R9A, CORO1A, LIMCH1, CFL1, DBN1, AKAP2, MYH10	1363	165	14219	2.21288	0.0443348	0.000781551	0.0244572		*		4
GOTERM_BP_ALL	GO:0051239~regulation of multicellular organismal process	111	5.7394	1.67072e-05	FGF18, PGF, EDN1, TLR2, TLR3, REST, PNP, TGFB1, SYP, BDNF, CUL7, TIAM1, GRIN2D, GATA3, CHRNA7, SPN, TWIST2, TWIST1, PHOX2A, ICOSL, PLXNB1, MYH6, CTNNA1, VASH2, VASH1, THY1, BMP2K, ADAMTS1, FGFR2, ADORA2B, BMPR2, BEX1, CX3CL1, TIMP2, ADA, CD74, EPHB2, TAL1, PROCR, TEK, NKX3-1, UBASH3A, MBNL3, TRP53, BMP4, SMAD7, CD276, H2-Q7, NOTCH3, LAMA4, TNFSF11, ETS1, CACNA1G, TBXA2R, PCSK1N, HDAC9, CACNA1B, G…	1363	778	14219	1.48839	0.0549534	0.000957525	0.0304824		REST, CHD7		0
GOTERM_BP_ALL	GO:0016481~negative regulation of transcription	62	3.20579	1.99295e-05	FOXK1, CDX4, RBM15B, NR6A1, HR, ZEB2, NFKB1, REST, CBX1, GLI3, TGFB1, CITED2, KCNIP3, LOC100048295, POU4F2, NRG1, MYC, TWIST2, KHDRBS1, ATF7IP, CTBP2, RARG, RCOR2, FOXJ1, PKIG, ZHX2, MLXIPL, TLE4, TLE1, IRF2BP1, PKIA, PURB, MXD4, HIPK2, ZFPM2, LCOR, MTDH, SUFU, NPAS1, OVOL1, POU2F1, SKIL, DNMT3B, MDFI, CEBPA, TRP53, DNMT3A, IKZF4, EHMT1, KLF12, JARID2, FZD1, MYPOP, CDKN1C, SALL4, ID2, ID1, JAZF1,…	1363	372	14219	1.73869	0.0651996	0.00112307	0.0363604		REST		0
GOTERM_BP_ALL	GO:0000904~cell morphogenesis involved in differentiation	41	2.11996	2.20824e-05	CDK5R1, ENAH, PAX6, L1CAM, CNP, GLI3, TGFB1, EPHB2, WNT4, BDNF, SLC1A3, ROBO1, BCL2, GBX2, ETV1, POU4F2, ETV4, DCLK1, RUNX3, COL18A1, KLF7, EGR2, EFNB3, PTPRZ1, KIF5C, STXBP1, NFASC, LMX1A, RGNEF, SLIT3, SEMA6A, EPHA4, SLITRK4, ID1, LOC100047930, EFNA5, NGFR, RBPJ, SLITRK5, GAP43, MYH10	1363	212	14219	2.01754	0.0719833	0.00122393	0.0402875		*		1
GOTERM_BP_ALL	GO:0048812~neuron projection morphogenesis	36	1.86143	2.24854e-05	CDK5R1, ENAH, PAX6, CNP, L1CAM, GLI3, EPHB2, BDNF, ROBO1, BCL2, GBX2, ETV1, POU4F2, ETV4, DCLK1, RUNX3, KLK8, KLF7, EGR2, EFNB3, PTPRZ1, KIF5C, STXBP1, NFASC, LMX1A, RGNEF, SLIT3, SEMA6A, EPHA4, SLITRK4, LOC100047930, EFNA5, NGFR, SLITRK5, GAP43, MYH10	1363	176	14219	2.13385	0.0732477	0.00122617	0.0410226		*		1
GOTERM_BP_ALL	GO:0035148~tube lumen formation	18	0.930714	2.43984e-05	DLC1, RET, ENAH, SHROOM3, LMO4, ZEB2, FZD3, SHANK3, BCL2L11, SUFU, FZD6, PFN1, WNT4, CFL1, NUP50, CASP8, GRLF1, TWIST1	1363	59	14219	3.18269	0.0792261	0.00130931	0.044512		*		1
GOTERM_BP_ALL	GO:0007264~small GTPase mediated signal transduction	47	2.4302	2.51951e-05	CTNNAL1, RAB3B, RAB3D, GNA12, RASGEF1B, RRAD, RGL1, DIRAS1, RASGRP3, TIAM1, HMOX1, RASL10B, RASGRP2, RAPGEF5, ERAS, RAB25, RAPGEF4, RHOC, ARL5C, RHOF, ARHGDIA, RAB27A, RAP2B, CNKSR1, VAV3, RAB39B, RASEF, PSD3, G3BP2, ARHGEF9, RAB33A, RAB32, PLCE1, RAB31, RAB30, RASL11A, RND1, RAB36, ARF3, REM2, GRLF1, RAB15, RAB13, LRRK1, ARL4C, RAPGEFL1, ARL4A	1363	258	14219	1.90043	0.0817046	0.00133093	0.0459652		*		0
GOTERM_BP_ALL	GO:0048598~embryonic morphogenesis	60	3.10238	2.52655e-05	DLC1, ENAH, LMO4, CRABP2, GNA12, EDN1, JAG2, ZEB2, PRRX2, GLI3, GLI1, SPRY2, WNT4, CHRNA9, CASP8, MYC, COL11A1, TWIST1, CYR61, RET, C2CD3, RARG, TMIE, OTX2, MECOM, ACVR2B, CFL1, ZFP697, WNT9A, TGFB1I1, EXT1, FGFR2, SHROOM3, BMPR2, SUFU, MSX2, PFN1, CHD7, NUP50, GBX2, POU2F1, OTOP1, MDFI, BMP4, TRP53, TBX4, HSPG2, EN1, FZD3, EPHA2, SHANK3, FZD6, WNT7B, SALL4, GCM1, GRLF1, LRP6, NEUROD1, PBX1, WNT7A	1363	359	14219	1.74353	0.0819231	0.00131412	0.0460935		CHD7		1
GOTERM_BP_ALL	GO:0001838~embryonic epithelial tube formation	17	0.879007	2.87144e-05	DLC1, RET, ENAH, SHROOM3, LMO4, ZEB2, FZD3, SUFU, SHANK3, FZD6, PFN1, WNT4, CFL1, NUP50, CASP8, GRLF1, TWIST1	1363	54	14219	3.28419	0.092573	0.00147077	0.052384		*		1
GOTERM_BP_ALL	GO:0016331~morphogenesis of embryonic epithelium	21	1.08583	3.20656e-05	FGFR2, DLC1, RET, ENAH, C2CD3, SHROOM3, LMO4, JAG2, ZEB2, FZD3, SHANK3, SUFU, FZD6, PFN1, WNT4, CFL1, NUP50, CASP8, GRLF1, TGFB1I1, TWIST1	1363	78	14219	2.80865	0.102803	0.00161779	0.0584959		*		1
GOTERM_BP_ALL	GO:0019222~regulation of metabolic process	341	17.6319	3.36795e-05	ADCY1, ADCY2, ADCY7, CDX4, ZFP334, ADCY6, EDN1, BBX, REST, 1700020N01RIK, CITED2, BDNF, ZFP94, ZFP473, TIGD3, CREB3L1, RAPGEF4, TIGD5, TWIST2, TWIST1, PHOX2A, ICOSL, RARG, RCOR2, ZFP628, SKP2, RXRG, ZFP467, ZHX2, MED14, MECOM, THY1, ZFP74, BAZ1A, ZFP462, PARP14, JUN, MAPK3, ZIM1, LOC100047930, CDCA7L, VGLL3, SUPT6H, PTH1R, IGF2BP1, ZFP619, CD74, ZFP618, PFN1, TAL1, TCF20, ARG2, PBRM1, LHX6, ARNTL…	1363	2942	14219	1.20916	0.107688	0.00167418	0.0614393		REST, MYCN, CHD7		0
GOTERM_BP_ALL	GO:0031323~regulation of cellular metabolic process	325	16.8046	3.39326e-05	ADCY1, ADCY2, ADCY7, CDX4, ZFP334, ADCY6, EDN1, BBX, REST, 1700020N01RIK, CITED2, ZFP94, ZFP473, TIGD3, CREB3L1, RAPGEF4, TIGD5, TWIST2, TWIST1, PHOX2A, ICOSL, RARG, RCOR2, ZFP628, RXRG, ZFP467, ZHX2, MED14, MECOM, THY1, ZFP74, BAZ1A, ZFP462, JUN, PARP14, MAPK3, ZIM1, LOC100047930, CDCA7L, VGLL3, SUPT6H, PTH1R, IGF2BP1, ZFP619, CD74, ZFP618, PFN1, TAL1, TCF20, ARG2, PBRM1, LHX6, ARNTL2, DNMT3B, B…	1363	2786	14219	1.21696	0.108452	0.00166233	0.0619009		REST, MYCN, CHD7		0
GOTERM_BP_ALL	GO:0048858~cell projection morphogenesis	39	2.01655	3.75623e-05	CDK5R1, ENAH, PAX6, L1CAM, CNP, GLI3, EPHB2, BDNF, ROBO1, BCL2, GBX2, ETV1, POU4F2, ETV4, DCLK1, RUNX3, KLF7, KLK8, C2CD3, EGR2, EFNB3, PTPRZ1, FOXJ1, KIF5C, STXBP1, NFASC, LMX1A, RGNEF, SLIT3, SEMA6A, EPHA4, BBS2, SLITRK4, LOC100047930, EFNA5, NGFR, SLITRK5, GAP43, MYH10	1363	202	14219	2.01413	0.119333	0.00181372	0.0685202		*		1
GOTERM_BP_ALL	GO:0045934~negative regulation of nucleobase, nucleoside, nucleotide and nucleic acid metabolic process	64	3.3092	4.01912e-05	FOXK1, CDX4, RBM15B, NR6A1, EDN1, HR, ZEB2, NFKB1, REST, CBX1, GLI3, TGFB1, CITED2, KCNIP3, LOC100048295, STRA8, POU4F2, NRG1, MYC, TWIST2, KHDRBS1, ATF7IP, CTBP2, RARG, RCOR2, FOXJ1, PKIG, ZHX2, MLXIPL, TLE4, TLE1, IRF2BP1, PKIA, PURB, MXD4, HIPK2, ZFPM2, LCOR, MTDH, SUFU, NPAS1, OVOL1, POU2F1, SKIL, DNMT3B, MDFI, CEBPA, TRP53, DNMT3A, IKZF4, EHMT1, KLF12, JARID2, FZD1, MYPOP, CDKN1C, SALL4, ID2…	1363	397	14219	1.68175	0.127131	0.00191323	0.0733141		REST		0
GOTERM_BP_ALL	GO:0006355~regulation of transcription, DNA-dependent	185	9.56567	4.55352e-05	CDX4, ARNT2, ZFP334, FOXO1, REST, CBX1, ZIC3, TGFB1, 1700020N01RIK, CITED2, GATA1, ZFP94, LOC100048295, ZFP473, GATA3, CREB3L1, TWIST2, TWIST1, PHOX2A, RARG, PKIG, ZHX2, ZFP628, MLXIPL, RXRG, MTA1, MED14, TCFAP2E, MECOM, PKIA, JUNB, FOXN3, FOXN4, ZFP74, ZFP462, JUN, ZFP790, ZIM1, LOC100047930, SMARCA1, SUPT6H, HMGB2, ZFP560, SOX4, SOX7, ZFP764, LIN28A, ZFP619, LIN28B, SOX8, SRF, PFN1, ZFP568, TAL…	1363	1465	14219	1.31737	0.14277	0.00213728	0.0830583		REST, MYCN		0
GOTERM_BP_ALL	GO:0048667~cell morphogenesis involved in neuron differentiation	36	1.86143	4.68466e-05	CDK5R1, ENAH, PAX6, CNP, L1CAM, GLI3, EPHB2, BDNF, SLC1A3, ROBO1, BCL2, GBX2, ETV1, POU4F2, ETV4, DCLK1, RUNX3, KLF7, EGR2, EFNB3, PTPRZ1, KIF5C, STXBP1, NFASC, LMX1A, RGNEF, SLIT3, SEMA6A, EPHA4, SLITRK4, LOC100047930, EFNA5, NGFR, SLITRK5, GAP43, MYH10	1363	182	14219	2.0635	0.146565	0.00216868	0.0854494		*		1
GOTERM_BP_ALL	GO:0051172~negative regulation of nitrogen compound metabolic process	64	3.3092	5.52995e-05	FOXK1, CDX4, RBM15B, NR6A1, EDN1, HR, ZEB2, NFKB1, REST, CBX1, GLI3, TGFB1, CITED2, KCNIP3, LOC100048295, STRA8, POU4F2, NRG1, MYC, TWIST2, KHDRBS1, ATF7IP, CTBP2, RARG, RCOR2, FOXJ1, PKIG, ZHX2, MLXIPL, TLE4, TLE1, IRF2BP1, PKIA, PURB, MXD4, HIPK2, ZFPM2, LCOR, MTDH, SUFU, NPAS1, OVOL1, POU2F1, SKIL, DNMT3B, MDFI, CEBPA, TRP53, DNMT3A, IKZF4, EHMT1, KLF12, JARID2, FZD1, MYPOP, CDKN1C, SALL4, ID2…	1363	401	14219	1.66498	0.170625	0.00252496	0.10086		REST		0
GOTERM_BP_ALL	GO:0034329~cell junction assembly	10	0.517063	6.68671e-05	DLC1, JUB, ARHGAP6, ITGA5, BCL2, GNPAT, LAMC1, ITGB3, CTNNA1, THY1	1363	21	14219	4.96768	0.202457	0.00301171	0.121946		*		4
GOTERM_BP_ALL	GO:0045892~negative regulation of transcription, DNA-dependent	52	2.68873	7.1855e-05	FOXK1, CDX4, NR6A1, NFKB1, REST, CBX1, TGFB1, KCNIP3, CITED2, LOC100048295, POU4F2, MYC, TWIST2, ATF7IP, CTBP2, RARG, FOXJ1, PKIG, ZHX2, MLXIPL, TLE4, TLE1, IRF2BP1, PKIA, PURB, HIPK2, ZFPM2, LCOR, MTDH, SUFU, NPAS1, OVOL1, SKIL, DNMT3B, CEBPA, MDFI, TRP53, DNMT3A, IKZF4, EHMT1, KLF12, JARID2, MYPOP, CDKN1C, SALL4, ID2, ID1, JAZF1, BCL6B, ID3, RBPJ, HDAC9	1363	308	14219	1.76127	0.215802	0.0031935	0.131037		REST		0
GOTERM_BP_ALL	GO:0022603~regulation of anatomical structure morphogenesis	36	1.86143	8.33442e-05	FGFR2, SHROOM3, ADORA2B, PGF, GNA12, CX3CL1, TGFB1, EPHB2, BDNF, METRN, TIAM1, BCL2, TEK, ETV4, BMP4, COL4A2, KLK8, PLXNB1, VASH2, VASH1, THY1, CORO1A, YWHAH, STAB1, ID1, PHB2, ITGA7, GRLF1, SPNA1, ADAMTS1, MYH14, NGFR, ARAP3, WNT7A, AKAP2, MYH10	1363	187	14219	2.00833	0.2457	0.00365519	0.151974		*		1
GOTERM_BP_ALL	GO:0051253~negative regulation of RNA metabolic process	52	2.68873	8.53172e-05	FOXK1, CDX4, NR6A1, NFKB1, REST, CBX1, TGFB1, KCNIP3, CITED2, LOC100048295, POU4F2, MYC, TWIST2, ATF7IP, CTBP2, RARG, FOXJ1, PKIG, ZHX2, MLXIPL, TLE4, TLE1, IRF2BP1, PKIA, PURB, HIPK2, ZFPM2, LCOR, MTDH, SUFU, NPAS1, OVOL1, SKIL, DNMT3B, CEBPA, MDFI, TRP53, DNMT3A, IKZF4, EHMT1, KLF12, JARID2, MYPOP, CDKN1C, SALL4, ID2, ID1, JAZF1, BCL6B, ID3, RBPJ, HDAC9	1363	310	14219	1.74991	0.250718	0.00369368	0.155569		REST		0
GOTERM_BP_ALL	GO:0009890~negative regulation of biosynthetic process	67	3.46432	0.00010129	FOXK1, CDX4, RBM15B, NR6A1, EDN1, HR, ZEB2, NFKB1, REST, CBX1, GLI3, TGFB1, CITED2, KCNIP3, EIF4EBP2, LOC100048295, STRA8, POU4F2, NRG1, MYC, TWIST2, KHDRBS1, ATF7IP, CTBP2, RARG, RCOR2, FOXJ1, PKIG, ZHX2, MLXIPL, TLE4, TLE1, IRF2BP1, PKIA, PURB, MXD4, HIPK2, ZFPM2, LCOR, MTDH, SUFU, NPAS1, OVOL1, POU2F1, SKIL, DNMT3B, GCHFR, MDFI, CEBPA, TRP53, DNMT3A, IKZF4, EHMT1, KLF12, JARID2, FZD1, CD276, M…	1363	434	14219	1.61049	0.290135	0.00432833	0.184668		REST		0
GOTERM_BP_ALL	GO:0010558~negative regulation of macromolecule biosynthetic process	65	3.36091	0.000105227	FOXK1, CDX4, RBM15B, NR6A1, HR, ZEB2, NFKB1, REST, CBX1, GLI3, TGFB1, CITED2, KCNIP3, EIF4EBP2, LOC100048295, STRA8, POU4F2, NRG1, MYC, TWIST2, KHDRBS1, ATF7IP, CTBP2, RARG, RCOR2, FOXJ1, PKIG, ZHX2, MLXIPL, TLE4, TLE1, IRF2BP1, PKIA, PURB, MXD4, HIPK2, ZFPM2, LCOR, MTDH, SUFU, NPAS1, OVOL1, POU2F1, SKIL, DNMT3B, MDFI, CEBPA, TRP53, DNMT3A, IKZF4, EHMT1, KLF12, JARID2, FZD1, CD276, MYPOP, CDKN1C,…	1363	418	14219	1.62222	0.299528	0.00444012	0.19184		REST		0
GOTERM_BP_ALL	GO:0032990~cell part morphogenesis	39	2.01655	0.000110228	CDK5R1, ENAH, PAX6, L1CAM, CNP, GLI3, EPHB2, BDNF, ROBO1, BCL2, GBX2, ETV1, POU4F2, ETV4, DCLK1, RUNX3, KLF7, KLK8, C2CD3, EGR2, EFNB3, PTPRZ1, FOXJ1, KIF5C, STXBP1, NFASC, LMX1A, RGNEF, SLIT3, SEMA6A, EPHA4, BBS2, SLITRK4, LOC100047930, EFNA5, NGFR, SLITRK5, GAP43, MYH10	1363	212	14219	1.91912	0.311282	0.00459341	0.20095		*		1
GOTERM_BP_ALL	GO:0030334~regulation of cell migration	22	1.13754	0.00012876	COL18A1, JUB, LOC100047211, IRS2, BCAR1, TLR2, PAX6, ITGB3, NEXN, PTEN, ADA, VCL, THY1, PRR5, CORO1A, LAMA4, BCL2, TEK, LAMB1-1, HBEGF, ARHGAP8, ARAP3, TRIP6	1363	92	14219	2.49464	0.353139	0.0052984	0.234696		*		3
GOTERM_BP_ALL	GO:0031327~negative regulation of cellular biosynthetic process	66	3.41262	0.000135969	FOXK1, CDX4, RBM15B, NR6A1, EDN1, HR, ZEB2, NFKB1, REST, CBX1, GLI3, TGFB1, CITED2, KCNIP3, EIF4EBP2, LOC100048295, STRA8, POU4F2, NRG1, MYC, TWIST2, KHDRBS1, ATF7IP, CTBP2, RARG, RCOR2, FOXJ1, PKIG, ZHX2, MLXIPL, TLE4, TLE1, IRF2BP1, PKIA, PURB, MXD4, HIPK2, ZFPM2, LCOR, MTDH, SUFU, NPAS1, OVOL1, POU2F1, SKIL, DNMT3B, MDFI, CEBPA, TRP53, DNMT3A, IKZF4, EHMT1, KLF12, JARID2, FZD1, CD276, MYPOP, C…	1363	430	14219	1.60121	0.368724	0.00552699	0.24782		REST		0
GOTERM_BP_ALL	GO:0007044~cell-substrate junction assembly	8	0.41365	0.000136457	DLC1, JUB, ARHGAP6, ITGA5, BCL2, LAMC1, ITGB3, THY1	1363	14	14219	5.96122	0.369767	0.00548095	0.248709		*		4
GOTERM_BP_ALL	GO:0016043~cellular component organization	227	11.7373	0.000142597	DLC1, GM6682, JUB, PDLIM7, TUBB2A, PDLIM3, L1CAM, AU015228, SYP, ACTG1, BDNF, CHRNA7, INA, PLD2, ARC, EFNB3, KIF5C, MYH6, CTNNA1, THY1, TIMM8A1, BAZ1A, TAGLN, LAMB1-1, LOC100047930, PELO, EFNA5, LAMC1, NEK4, BIN1, DBN1, LOC100047211, CDK5R1, HSPA1A, HSPA1B, CD74, EPHB2, PFN1, PBRM1, DNMT3B, OLFM1, NUDC, COL18A1, DNMT3A, KLF7, LGALS3, CREBBP, CDC27, EPHA4, SEMA6A, RBPJ, CLCN5, NUAK2, BCAR1, GLI3, …	1363	1891	14219	1.2523	0.382725	0.00565969	0.259886		CHD7		14
GOTERM_BP_ALL	GO:0007169~transmembrane receptor protein tyrosine kinase signaling pathway	36	1.86143	0.000143855	FGFR2, FGF18, FGF5, FGFR3, FGF15, ERBB3, BCAR1, FGF17, BEX1, BMPR2, FOXO1, CLNK, PTEN, EPHB2, EIF4EBP2, TIAM1, TEK, TGFA, GHR, EGFR, IRS2, RET, EFNB3, FLT4, STXBP4, EPHA1, FLNA, EPHA2, KDR, DDR1, EPHA4, GRB10, CSRNP1, ROR1, HBEGF, PTPN1	1363	192	14219	1.95603	0.385345	0.00564326	0.262175		*		0
GOTERM_BP_ALL	GO:0051171~regulation of nitrogen compound metabolic process	277	14.3226	0.000154057	ADCY1, ADCY2, ADCY7, CDX4, ADCY6, ZFP334, EDN1, BBX, REST, 1700020N01RIK, CITED2, ZFP94, ZFP473, TIGD3, CREB3L1, TIGD5, TWIST2, TWIST1, PHOX2A, RARG, RCOR2, ZFP628, RXRG, ZFP467, ZHX2, MED14, MECOM, ZFP74, BAZ1A, ZFP462, JUN, PARP14, MAPK3, ZIM1, LOC100047930, CDCA7L, VGLL3, SUPT6H, PTH1R, ZFP619, ZFP618, PFN1, TAL1, TCF20, ARG2, PBRM1, LHX6, ARNTL2, DNMT3B, NKRF, MDFI, BMP4, IKZF4, DNMT3A, KLF6,…	1363	2372	14219	1.21826	0.406202	0.00597308	0.280745		REST, MYCN, CHD7		0
GOTERM_BP_ALL	GO:0000122~negative regulation of transcription from RNA polymerase II promoter	41	2.11996	0.000159459	MTDH, CDX4, NR6A1, SUFU, TGFB1, KCNIP3, NPAS1, LOC100048295, OVOL1, POU4F2, SKIL, MYC, CEBPA, MDFI, ATF7IP, TRP53, DNMT3A, EHMT1, RARG, KLF12, JARID2, FOXJ1, PKIG, ZHX2, MLXIPL, TLE4, TLE1, IRF2BP1, MYPOP, PKIA, CDKN1C, SALL4, ID2, ID1, HIPK2, BCL6B, JAZF1, ZFPM2, ID3, HDAC9, LCOR	1363	231	14219	1.85159	0.416956	0.00611184	0.290575		*		0
GOTERM_BP_ALL	GO:0051270~regulation of cell motion	24	1.24095	0.000165547	COL18A1, JUB, LOC100047211, IRS2, ACTN4, BCAR1, TLR2, PAX6, ITGB3, NEXN, PTEN, ADA, VCL, THY1, BBS2, PRR5, CORO1A, LAMA4, BCL2, LAMB1-1, TEK, HBEGF, ARHGAP8, ARAP3, TRIP6	1363	107	14219	2.33992	0.428844	0.00627342	0.301654		*		3
GOTERM_BP_ALL	GO:0008285~negative regulation of cell proliferation	40	2.06825	0.000170326	DLC1, CAV2, FGFR3, PTGS2, E2F7, PTH1R, PAX6, SFN, TIMP2, GLI3, PTEN, TGFB1, H19, MSX2, SPRY2, BDNF, GATA3, BCL2, HMOX1, NKX3-1, LTB, ETV4, RUNX3, SPN, CEBPA, NOX4, BMP4, TRP53, RARG, JARID2, FOXJ1, CD276, CTNNA1, VASH1, DDR1, JUN, PHB2, GDF11, LOC100047930, RBPJ	1363	224	14219	1.86288	0.438004	0.00638244	0.310348		*		3
GOTERM_BP_ALL	GO:0031328~positive regulation of cellular biosynthetic process	80	4.1365	0.000171302	HSP90AB1, GM98, E2F3, FOXK1, ARNT2, TLR2, PAX6, FOXO1, TLR3, EIF5A, NFKB1, GLI3, TGFB1, ZIC3, RAET1B, CITED2, GLI1, RAET1A, LOC100048295, GATA3, PAX8, POU4F2, MKL1, FOSL1, MYC, LTB, SPN, ATF7IP, ICOSL, EGR2, RARG, SOX11, OTX2, MLXIPL, RXRG, MED14, TCFAP2E, MECOM, SMO, ZFP462, JUN, ZMIZ1, HIPK2, ZFPM2, SMARCA1, HMGB2, ADORA2B, UBE3A, SOX4, LIN28A, SRF, ARID2, SOX8, GM3258, NFAT5, POU2F1, ETV1, TCE…	1363	552	14219	1.5119	0.439857	0.00634858	0.312124		*		0
GOTERM_BP_ALL	GO:0007015~actin filament organization	16	0.827301	0.000180023	ENAH, SHROOM4, ACTN4, BCAR1, PDLIM3, SRF, FLNA, ESPN, PPP1R9A, CORO1A, ARHGAP6, FAT1, BCL2, CFL1, AKAP2, DBN1	1363	56	14219	2.98061	0.456146	0.0065985	0.327991		*		4
GOTERM_BP_ALL	GO:0009889~regulation of biosynthetic process	287	14.8397	0.000184936	ADCY1, ADCY2, ADCY7, CDX4, ADCY6, ZFP334, EDN1, BBX, REST, 1700020N01RIK, CITED2, ZFP94, ZFP473, TIGD3, CREB3L1, TIGD5, TWIST2, TWIST1, PHOX2A, ICOSL, RARG, RCOR2, ZFP628, RXRG, ZFP467, ZHX2, MED14, MECOM, ZFP74, BAZ1A, ZFP462, JUN, PARP14, MAPK3, ZIM1, LOC100047930, CDCA7L, VGLL3, SUPT6H, PTH1R, IGF2BP1, ZFP619, ZFP618, PFN1, TAL1, TCF20, ARG2, PBRM1, LHX6, ARNTL2, DNMT3B, NKRF, MDFI, BMP4, IKZF…	1363	2476	14219	1.20922	0.46511	0.00670532	0.336926		REST, MYCN, CHD7		0
GOTERM_BP_ALL	GO:0031326~regulation of cellular biosynthetic process	286	14.788	0.000194827	ADCY1, ADCY2, ADCY7, CDX4, ADCY6, ZFP334, EDN1, BBX, REST, 1700020N01RIK, CITED2, ZFP94, ZFP473, TIGD3, CREB3L1, TIGD5, TWIST2, TWIST1, PHOX2A, ICOSL, RARG, RCOR2, ZFP628, RXRG, ZFP467, ZHX2, MED14, MECOM, ZFP74, BAZ1A, ZFP462, JUN, PARP14, MAPK3, ZIM1, LOC100047930, CDCA7L, VGLL3, SUPT6H, PTH1R, IGF2BP1, ZFP619, ZFP618, PFN1, TAL1, TCF20, ARG2, PBRM1, LHX6, ARNTL2, DNMT3B, NKRF, MDFI, BMP4, IKZF…	1363	2467	14219	1.2094	0.482716	0.00698784	0.354916		REST, MYCN, CHD7		0
GOTERM_BP_ALL	GO:0051093~negative regulation of developmental process	40	2.06825	0.000206086	CALCR, BEX1, PAX6, REST, GLI3, ITGB1, CD74, TGFB1, EPHB2, WNT4, BDNF, BCL2, RHOC, MBNL3, SKIL, TWIST2, TWIST1, ZFP36, BMP4, TRP53, COL4A2, KLK8, FOXJ1, CREBBP, LMX1A, CTNNA1, VASH1, THY1, NOTCH3, YWHAH, STAB1, GDF11, PBX1, ADAMTS1, WNT9A, NGFR, TGFB1I1, RBPJ, HDAC9, TOB2	1363	226	14219	1.8464	0.502053	0.00731273	0.375391		REST		1
GOTERM_BP_ALL	GO:0019219~regulation of nucleobase, nucleoside, nucleotide and nucleic acid metabolic process	274	14.1675	0.000213444	ADCY1, ADCY2, ADCY7, CDX4, ADCY6, ZFP334, EDN1, BBX, REST, 1700020N01RIK, CITED2, ZFP94, ZFP473, TIGD3, CREB3L1, TIGD5, TWIST2, TWIST1, PHOX2A, RARG, RCOR2, ZFP628, RXRG, ZFP467, ZHX2, MED14, MECOM, ZFP74, BAZ1A, ZFP462, JUN, PARP14, MAPK3, ZIM1, LOC100047930, CDCA7L, VGLL3, SUPT6H, PTH1R, ZFP619, ZFP618, PFN1, TAL1, TCF20, PBRM1, LHX6, ARNTL2, DNMT3B, NKRF, MDFI, BMP4, IKZF4, DNMT3A, KLF6, UTF1,…	1363	2353	14219	1.21479	0.514296	0.00749424	0.388768		REST, MYCN, CHD7		0
GOTERM_BP_ALL	GO:0051179~localization	305	15.7704	0.000227372	S100A4, JUB, SYT1, SLC9A7, SYT4, SYT5, SYT3, EDN1, AQP5, SYP, ATCAY, BDNF, CHRNA9, KCNK6, LCAT, GRIN2D, RAB25, RAPGEF4, CHRNA7, NUP35, TWIST1, RAB27A, PLD2, ARC, SRP54A, 2010107G12RIK, MYH6, PITPNM1, RPS19, TIMM8A1, CD34, ABCB1B, RAB15, RAB13, LAMC1, BIN1, KCNMB4, 1700034H14RIK, LOC100047211, RBP7, CDK5R1, RBP1, TMX4, CACNB2, RIMS2, KCNJ3, RIMS4, CD74, RIMS3, PFN1, IL17B, SPNB2, NUP50, LHX6, STX1…	1363	2659	14219	1.19662	0.536657	0.00789943	0.414088		*		0
GOTERM_BP_ALL	GO:0009891~positive regulation of biosynthetic process	80	4.1365	0.000231344	HSP90AB1, GM98, E2F3, FOXK1, ARNT2, TLR2, PAX6, FOXO1, TLR3, EIF5A, NFKB1, GLI3, TGFB1, ZIC3, RAET1B, CITED2, GLI1, RAET1A, LOC100048295, GATA3, PAX8, POU4F2, MKL1, FOSL1, MYC, LTB, SPN, ATF7IP, ICOSL, EGR2, RARG, SOX11, OTX2, MLXIPL, RXRG, MED14, TCFAP2E, MECOM, SMO, ZFP462, JUN, ZMIZ1, HIPK2, ZFPM2, SMARCA1, HMGB2, ADORA2B, UBE3A, SOX4, LIN28A, SRF, ARID2, SOX8, GM3258, NFAT5, POU2F1, ETV1, TCE…	1363	557	14219	1.49833	0.542842	0.0079552	0.421307		*		0
GOTERM_BP_ALL	GO:0010605~negative regulation of macromolecule metabolic process	74	3.82627	0.000237924	FOXK1, CDX4, RBM15B, NR6A1, HR, ZEB2, NFKB1, CBX1, REST, GLI3, TGFB1, CITED2, KCNIP3, EIF4EBP2, LOC100048295, STRA8, POU4F2, NRG1, MYC, TWIST2, KHDRBS1, ATF7IP, RARG, CTBP2, RCOR2, FOXJ1, PKIG, SOCS1, ZHX2, MLXIPL, SKP2, TLE4, TLE1, IRF2BP1, PKIA, PURB, FLNA, MXD4, JUN, HIPK2, ZFPM2, LCOR, MTDH, LIN28A, LIN28B, SUFU, SRRT, NPAS1, OVOL1, POU2F1, SKIL, DNMT3B, TDRD1, MDFI, BMP4, CEBPA, TRP53, IKZF4…	1363	506	14219	1.52565	0.552909	0.00809827	0.433266		REST		0
GOTERM_BP_ALL	GO:0008284~positive regulation of cell proliferation	47	2.4302	0.000267459	FGFR2, FGF5, FGF18, E2F3, FGFR3, FOSL2, FGF15, FGF17, PTH1R, EDN1, PAX6, ST8SIA1, BEX1, CNTFR, PRRX2, PNP, ITGB1, ADA, TGFB1, GLI1, BCL2, TGFA, MYC, SPN, COL18A1, EGFR, ODC1, IRS2, ICOSL, CRIP2, FLT4, RASIP1, VASH2, KDR, MYCN, SMO, TNS3, CORO1A, CCND2, ZMIZ1, HIPK2, HBEGF, PBX1, CDCA7L, NGFR, RBPJ, F2R	1363	284	14219	1.72644	0.595432	0.00900853	0.486926		MYCN		3
GOTERM_BP_ALL	GO:0044092~negative regulation of molecular function	27	1.39607	0.000285849	MDFI, CFLAR, FOXJ1, PKIG, STIM2, HSPA1A, HSPA1B, PKIA, FLNA, SPRY4, LATS2, THY1, SH3BP5, SMO, SPRY2, CHRM4, ZFP462, ARG2, GPR44, HMOX1, GRM6, SPRED2, SPRED3, SPRED1, DUSP9, GADD45A, MYC, DHCR24	1363	132	14219	2.13385	0.619841	0.00953019	0.520323		*		0
GOTERM_BP_ALL	GO:0001501~skeletal system development	47	2.4302	0.000290078	FGFR2, FGF18, RAI1, FGFR3, PDLIM7, PTGS2, EDN1, PTH1R, JAG2, DLK1, PRRX2, GLI3, MMP2, TGFB1, BCL2, ANKRD11, PTN, MYC, PAPSS2, COL11A1, RPS27A, BMP4, MDFI, RARG, BMP1, LGALS3, TBX4, DLL3, HSPG2, MMP14, CACNA1S, COL5A2, EPHA2, SMO, ACVR2B, TNFSF11, CSRNP1, MAPK3, ZFP697, SORT1, PBX1, WNT9A, WNT7A, BMP8B, TCF15, BMP6, BMP8A	1363	285	14219	1.72039	0.625243	0.00957617	0.528002		*		1
GOTERM_BP_ALL	GO:0007010~cytoskeleton organization	52	2.68873	0.000305016	DLC1, PRPH, ENAH, PDLIM7, NUAK2, BCAR1, PDLIM3, CNP, ACTG1, ARHGAP6, ARHGAP8, TUBA1B, INA, FMNL2, ACTN4, MTAP2, FOXJ1, ARHGEF17, GAN, MYH6, FLNA, THY1, BBS2, TAGLN, LIMCH1, CFL1, MTAP1B, AKAP2, GADD45A, DBN1, HAUS4, LOC100047211, SHROOM3, SHROOM4, FHL3, ITGB1, SRF, ESPN, PFN1, PRR5, DOCK2, FAT1, BCL2, NEFH, CNN2, CNN1, EHD2, RGNEF, CORO1A, PPP1R9A, YWHAH, ARHGAP10, MYH10	1363	326	14219	1.66402	0.643716	0.00996964	0.55512		*		4
GOTERM_BP_ALL	GO:0043588~skin development	11	0.568769	0.000314919	FRAS1, TGM3, NGFR, SFN, WNT7A, LTB, COL5A2, COL5A1, TCF15, SUFU, DHCR24	1363	30	14219	3.82512	0.655458	0.0101932	0.573094		*		1
GOTERM_BP_ALL	GO:0001525~angiogenesis	27	1.39607	0.000323585	FGFR2, FGF18, PGF, EDN1, ANPEP, CX3CL1, PTEN, SRF, HMOX1, CASP8, GBX2, TGFA, SOX18, PLCD1, PLXND1, CYR61, COL18A1, BMP4, TBX4, MMP14, VASH1, ANXA2, THY1, KDR, ECSCR, HBEGF, RBPJ	1363	133	14219	2.1178	0.665415	0.0103731	0.588821		*		1
GOTERM_BP_ALL	GO:0065007~biological regulation	722	37.332	0.000347438	DLC1, JUB, SLC9A7, PTGS2, PGF, FSTL3, L1CAM, REST, CITED2, SYP, LPHN2, LPHN3, DIRAS1, CUL7, PPP1R1A, GRIN2D, TIGD3, TIGD5, GNG3, RAB27A, PHOX2A, ICOSL, MAGI2, RCOR2, SKP2, ZHX2, F8, RXRG, MED14, MYH6, MECOM, CTNNA1, BCL2L11, THY1, GRB10, RPS19, F5, JUN, MAPK3, ABAT, HSD11B2, ADAMTS1, VGLL3, IGFBPL1, GNAI1, ERBB3, PTH1R, HSPA1A, HSPA1B, PFN1, 2610018G03RIK, PROCR, ARG2, UBASH3A, ARNTL2, DNMT3B, DN…	1363	6903	14219	1.09112	0.691362	0.0110292	0.632096		REST, MYCN, CHD7		0
GOTERM_BP_ALL	GO:0010557~positive regulation of macromolecule biosynthetic process	76	3.92968	0.000356464	GM98, E2F3, FOXK1, ARNT2, PAX6, FOXO1, EIF5A, TLR3, NFKB1, GLI3, TGFB1, ZIC3, CITED2, GLI1, LOC100048295, GATA3, PAX8, POU4F2, MKL1, FOSL1, MYC, LTB, SPN, ATF7IP, ICOSL, RARG, EGR2, SOX11, OTX2, MLXIPL, RXRG, MED14, TCFAP2E, MECOM, SMO, ZFP462, JUN, ZMIZ1, HIPK2, ZFPM2, SMARCA1, HMGB2, UBE3A, SOX4, LIN28A, SRF, SOX8, ARID2, GM3258, NFAT5, POU2F1, ETV1, TCEA1, SUPT4H1, POU3F1, NFATC2, ETV4, HMGA1-…	1363	530	14219	1.49593	0.700648	0.011209	0.648468		*		0
GOTERM_BP_ALL	GO:0045595~regulation of cell differentiation	59	3.05067	0.000366433	FGF18, PAX6, REST, PNP, GLI3, TGFB1, METRN, WNT4, BDNF, PLEKHB1, CUL7, TIAM1, POU4F2, RHOC, NRG1, TWIST2, TWIST1, ZFP36, SH3PXD2B, PLXNB1, FOXJ1, CTNNA1, JUNB, THY1, SMO, TCFL5, LCK, WNT9A, TGFB1I1, FGFR3, BEX1, TIMP2, SRF, ITGB1, CD74, ADA, EPHB2, TAL1, BCL2, SKIL, MBNL3, BMP4, TRP53, KLK8, CREBBP, CD276, LMX1A, NOTCH3, WNT7B, YWHAH, TNFSF11, ID2, ETS1, GDF11, PBX1, HDAC9, RBPJ, WNT7A, TOB2	1363	386	14219	1.59455	0.710578	0.0114146	0.666545		REST		1
GOTERM_BP_ALL	GO:0050789~regulation of biological process	687	35.5222	0.000383556	DLC1, JUB, PTGS2, PGF, FSTL3, L1CAM, REST, CITED2, SYP, LPHN2, LPHN3, DIRAS1, CUL7, PPP1R1A, GRIN2D, TIGD3, TIGD5, GNG3, RAB27A, PHOX2A, ICOSL, MAGI2, RCOR2, SKP2, ZHX2, RXRG, MED14, MYH6, MECOM, CTNNA1, BCL2L11, THY1, GRB10, JUN, MAPK3, ADAMTS1, VGLL3, IGFBPL1, ERBB3, GNAI1, PTH1R, HSPA1A, HSPA1B, PFN1, 2610018G03RIK, PROCR, ARG2, UBASH3A, ARNTL2, DNMT3B, DNMT3A, ODC1, UTF1, KLF12, RASEF, SFMBT2…	1363	6542	14219	1.09552	0.726873	0.011836	0.697589		REST, MYCN, CHD7		0
GOTERM_BP_ALL	GO:0010468~regulation of gene expression	279	14.4261	0.000424499	CDX4, ZFP334, BBX, REST, 1700020N01RIK, CITED2, ZFP94, ZFP473, TIGD3, CREB3L1, TIGD5, TWIST2, TWIST1, PHOX2A, RARG, RCOR2, ZFP628, SKP2, RXRG, ZFP467, ZHX2, MED14, MECOM, ZFP74, BAZ1A, ZFP462, JUN, PARP14, MAPK3, ZIM1, LOC100047930, CDCA7L, VGLL3, SUPT6H, IGF2BP1, ZFP619, ZFP618, PFN1, TAL1, TCF20, PBRM1, LHX6, ARNTL2, DNMT3B, TDRD1, NKRF, MDFI, BMP4, IKZF4, DNMT3A, KLF6, UTF1, KLF7, KLF12, SMAD7…	1363	2429	14219	1.19826	0.762214	0.0129732	0.771782		REST, MYCN, CHD7		0
GOTERM_BP_ALL	GO:0032879~regulation of localization	61	3.15408	0.000440765	JUB, SYT4, BCAR1, EDN1, TLR2, PAX6, GLI3, PTEN, TGFB1, VCL, PACSIN1, HMOX1, CHRNA7, RAPGEF4, ARHGAP8, LTB, KHDRBS1, IRS2, ATP4A, ACTN4, PFKL, PKIG, STIM2, NEXN, PKIA, FLNA, THY1, SMO, BBS2, GRB10, LCK, LAMB1-1, BIN1, STON2, ARHGDIG, RAB3B, LOC100047211, STON1, ADORA2B, RAB3D, ITGB3, SYCP1, SUFU, ADA, PRR5, GP1BB, BCL2, TEK, CAMK2A, ARHGDIA, COL18A1, PARK2, PEA15A, DDX4, KCNN4, LAMA4, CORO1A, PLCG…	1363	406	14219	1.56739	0.774951	0.0133465	0.801243		*		0
GOTERM_BP_ALL	GO:0009892~negative regulation of metabolic process	76	3.92968	0.000442374	FOXK1, CDX4, RBM15B, NR6A1, EDN1, HR, ZEB2, NFKB1, CBX1, REST, GLI3, TGFB1, CITED2, KCNIP3, EIF4EBP2, LOC100048295, STRA8, POU4F2, NRG1, MYC, TWIST2, KHDRBS1, ATF7IP, RARG, CTBP2, RCOR2, FOXJ1, PKIG, SOCS1, ZHX2, MLXIPL, SKP2, TLE4, TLE1, IRF2BP1, PKIA, PURB, FLNA, MXD4, JUN, HIPK2, ZFPM2, LCOR, MTDH, LIN28A, LIN28B, SUFU, SRRT, NPAS1, OVOL1, POU2F1, SKIL, DNMT3B, TDRD1, GCHFR, MDFI, BMP4, CEBPA,…	1363	534	14219	1.48472	0.776173	0.0132761	0.804155		REST		0
GOTERM_BP_ALL	GO:0006468~protein amino acid phosphorylation	88	4.55016	0.000473735	NUAK2, NUAK1, CCNT1, CAD, C230081A13RIK, TGFB1, LATS2, D8ERTD82E, PAK6, CCNE1, PAK3, CDK12, TGFA, MLKL, CDK14, EGFR, RET, SGK2, MTAP2, PRKCH, RPS6KC1, CDK6, PKDCC, PRKCE, CDKL2, DAPK3, STK4, CDKL5, DAPK1, PRKCB, HUNK, DDR1, PLCE1, STYK1, ACVR2B, CDKL1, MAPK3, LCK, HIPK2, CFL1, ROR1, BMP2K, NRK, NEK4, MAP3K14, LRRK1, FGFR2, FGFR3, ERBB3, STK10, BMPR2, ABI2, BRSK1, MAPKAPK2, CD74, TRIB1, EPHB2, CAM…	1363	640	14219	1.43442	0.798713	0.0140859	0.860932		*		0
GOTERM_BP_ALL	GO:0045941~positive regulation of transcription	69	3.56774	0.000475399	GM98, E2F3, FOXK1, ARNT2, PAX6, FOXO1, NFKB1, GLI3, ZIC3, TGFB1, CITED2, GLI1, LOC100048295, GATA3, PAX8, POU4F2, MKL1, FOSL1, MYC, ATF7IP, RARG, EGR2, SOX11, OTX2, MLXIPL, RXRG, MED14, TCFAP2E, MECOM, SMO, ZFP462, JUN, ZMIZ1, HIPK2, ZFPM2, SMARCA1, HMGB2, UBE3A, SOX4, SRF, SOX8, ARID2, GM3258, NFAT5, POU2F1, ETV1, TCEA1, SUPT4H1, POU3F1, NFATC2, ETV4, HMGA1-RS1, BMP4, CEBPA, TRP53, KLF6, KLF7, U…	1363	475	14219	1.5154	0.799844	0.0140119	0.863943		*		0
GOTERM_BP_ALL	GO:0060541~respiratory system development	25	1.29266	0.000627688	FGFR2, FGF18, BMPR2, DAG1, GLI3, ADA, GLI1, SPRY2, SLC23A1, CHD7, POU2F1, HHIP, BMP4, CEBPA, RARG, TBX4, CFTR, MMP14, MYCN, KDR, TNS3, ACVR2B, ID1, LOC100047930, ZFPM2	1363	124	14219	2.10325	0.880464	0.0183012	1.1392		CHD7, MYCN		1
GOTERM_BP_ALL	GO:0050680~negative regulation of epithelial cell proliferation	10	0.517063	0.000627872	BMP4, FGFR3, PHB2, PAX6, LOC100047930, NKX3-1, PTEN, RUNX3, TGFB1, ETV4	1363	27	14219	3.86375	0.880538	0.0181502	1.13954		*		3
GOTERM_BP_ALL	GO:0040012~regulation of locomotion	23	1.18925	0.000655135	COL18A1, JUB, LOC100047211, IRS2, BCAR1, TLR2, PAX6, ITGB3, NEXN, PTEN, ADA, VCL, THY1, BBS2, PRR5, CORO1A, LAMA4, BCL2, TEK, LAMB1-1, HBEGF, ARHGAP8, ARAP3, TRIP6	1363	110	14219	2.18126	0.89107	0.0187707	1.18874		*		3
GOTERM_BP_ALL	GO:0016477~cell migration	40	2.06825	0.000709645	NRP2, JUB, CDK5R1, FGF15, BCAR1, PAX6, GJA1, ABI2, ZEB2, CX3CL1, ITGB1, PTEN, SRF, TGFB1, IL17B, GBX2, SEMA3C, LHX6, NRG1, DCLK1, TWIST1, EGFR, RET, VAV3, FOXJ1, PODXL, ITGA3, MMP14, KDR, SMO, TNS3, CORO1A, ITGA6, CD34, CFL1, LTB4R2, LRP6, HBEGF, LAMC1, MYH10	1363	240	14219	1.73869	0.909425	0.0201467	1.28704		*		3
GOTERM_BP_ALL	GO:0051173~positive regulation of nitrogen compound metabolic process	74	3.82627	0.000739714	HSP90AB1, GM98, E2F3, FOXK1, ARNT2, PAX6, TLR2, FOXO1, NFKB1, PNP, GLI3, TGFB1, ZIC3, RAET1B, CITED2, GLI1, RAET1A, LOC100048295, GATA3, PAX8, POU4F2, MKL1, FOSL1, MYC, ATF7IP, RARG, EGR2, SOX11, OTX2, MLXIPL, RXRG, MED14, TCFAP2E, MECOM, SMO, ZFP462, JUN, ZMIZ1, HIPK2, ZFPM2, SMARCA1, HMGB2, ADORA2B, UBE3A, SOX4, SRF, SOX8, ARID2, GM3258, NFAT5, POU2F1, ETV1, TCEA1, SUPT4H1, POU3F1, NFATC2, ETV4…	1363	526	14219	1.46764	0.918192	0.0208171	1.34123		*		0
GOTERM_BP_ALL	GO:0050794~regulation of cellular process	653	33.7642	0.000748285	DLC1, JUB, PTGS2, PGF, FSTL3, L1CAM, REST, CITED2, SYP, LPHN2, LPHN3, DIRAS1, CUL7, PPP1R1A, TIGD3, TIGD5, GNG3, RAB27A, PHOX2A, ICOSL, MAGI2, RCOR2, SKP2, ZHX2, RXRG, MED14, MECOM, CTNNA1, BCL2L11, THY1, GRB10, JUN, MAPK3, VGLL3, IGFBPL1, ERBB3, GNAI1, PTH1R, HSPA1A, HSPA1B, PFN1, 2610018G03RIK, ARG2, UBASH3A, ARNTL2, DNMT3B, DNMT3A, ODC1, UTF1, KLF12, RASEF, SFMBT2, RGS2, 9130019O22RIK, ARF3, P…	1363	6224	14219	1.0945	0.920532	0.0208822	1.35667		REST, MYCN, CHD7		0
GOTERM_BP_ALL	GO:0043583~ear development	22	1.13754	0.000754761	FGFR2, FGFR3, TMIE, OTX2, EDN1, JAG2, FZD3, PRRX2, BCL2L11, GPR98, FZD6, DDR1, SPRY2, BDNF, CHD7, CHRNA9, BCL2, GBX2, COL11A1, MYC, TCF15, OTOP1	1363	104	14219	2.2068	0.922255	0.0208888	1.36833		CHD7		1
GOTERM_BP_ALL	GO:0006793~phosphorus metabolic process	112	5.79111	0.000762636	C230081A13RIK, TGFB1, MLKL, EGFR, RET, PTPRF, RPS6KC1, PTPRU, PTPRN, CDKL2, STK4, CDKL5, PLCE1, CDKL1, MAPK3, ROR1, BMP2K, NEK4, LRRK1, FGFR2, LOC100045551, FGFR3, ERBB3, STK10, SSH2, BMPR2, MAPKAPK2, CD74, EPHB2, CAMKV, 2610018G03RIK, SPNB2, TEK, TEC, MDFI, GPD2, PTPN9, SMAD7, PTPN4, PTPN14, MOBKL1A, PTPN13, TRIO, EPHA1, EPHA2, PPA1, KDR, EPHA4, PLK5, IKBKE, PLK2, DUSP26, DUSP27, PTPN1, GRK5, NU…	1363	866	14219	1.34919	0.9243	0.0209334	1.38252		*		0
GOTERM_BP_ALL	GO:0006796~phosphate metabolic process	112	5.79111	0.000762636	C230081A13RIK, TGFB1, MLKL, EGFR, RET, PTPRF, RPS6KC1, PTPRU, PTPRN, CDKL2, STK4, CDKL5, PLCE1, CDKL1, MAPK3, ROR1, BMP2K, NEK4, LRRK1, FGFR2, LOC100045551, FGFR3, ERBB3, STK10, SSH2, BMPR2, MAPKAPK2, CD74, EPHB2, CAMKV, 2610018G03RIK, SPNB2, TEK, TEC, MDFI, GPD2, PTPN9, SMAD7, PTPN4, PTPN14, MOBKL1A, PTPN13, TRIO, EPHA1, EPHA2, PPA1, KDR, EPHA4, PLK5, IKBKE, PLK2, DUSP26, DUSP27, PTPN1, GRK5, NU…	1363	866	14219	1.34919	0.9243	0.0209334	1.38252		*		0
GOTERM_BP_ALL	GO:0001841~neural tube formation	14	0.723888	0.000801451	DLC1, ENAH, SHROOM3, LMO4, FZD3, ZEB2, SUFU, FZD6, PFN1, CFL1, CASP8, NUP50, GRLF1, TWIST1	1363	51	14219	2.86372	0.933622	0.0218106	1.45239		*		1
GOTERM_BP_ALL	GO:0045893~positive regulation of transcription, DNA-dependent	61	3.15408	0.000828342	GM98, E2F3, FOXK1, ARNT2, PAX6, FOXO1, NFKB1, ZIC3, TGFB1, CITED2, GLI1, LOC100048295, GATA3, PAX8, POU4F2, FOSL1, MYC, ATF7IP, RARG, EGR2, SOX11, OTX2, RXRG, MLXIPL, MED14, TCFAP2E, MECOM, SMO, ZFP462, ZMIZ1, JUN, HIPK2, ZFPM2, SMARCA1, HMGB2, UBE3A, SOX4, SRF, SOX8, ARID2, POU2F1, NFAT5, TCEA1, POU3F1, NFATC2, BMP4, CEBPA, TRP53, KLF6, KLF7, UTF1, KLF12, MAML1, CREBBP, TEAD3, SALL4, ETS1, CSRNP…	1363	416	14219	1.52971	0.939399	0.0223547	1.50078		*		0
GOTERM_BP_ALL	GO:0045944~positive regulation of transcription from RNA polymerase II promoter	54	2.79214	0.000890863	ARNT2, PAX6, FOXO1, NFKB1, ZIC3, TGFB1, CITED2, GLI1, LOC100048295, GATA3, PAX8, POU4F2, MYC, FOSL1, RARG, EGR2, SOX11, OTX2, RXRG, MLXIPL, MED14, TCFAP2E, MECOM, SMO, ZFP462, ZMIZ1, JUN, HIPK2, ZFPM2, HMGB2, UBE3A, SOX4, SOX8, ARID2, SRF, POU2F1, NFAT5, TCEA1, POU3F1, NFATC2, BMP4, CEBPA, TRP53, KLF6, UTF1, KLF12, MAML1, CREBBP, TEAD3, SALL4, ETS1, CSRNP1, NEUROD1, PBX1	1363	358	14219	1.57356	0.950961	0.0238325	1.61319		*		0
GOTERM_BP_ALL	GO:0051674~localization of cell	45	2.32678	0.000936395	NRP2, JUB, CDK5R1, FGF15, BCAR1, PAX6, GJA1, ABI2, ZEB2, DNAHC11, CX3CL1, SRF, ITGB1, PTEN, TGFB1, IL17B, RSPH4A, GBX2, SEMA3C, LHX6, CHRNA7, NRG1, DCLK1, TWIST1, EGFR, RET, VAV3, FOXJ1, PODXL, ATP1A3, ITGA3, MMP14, GAS8, KDR, SMO, TNS3, CORO1A, ITGA6, CD34, CFL1, LTB4R2, LRP6, HBEGF, LAMC1, MYH10	1363	284	14219	1.65298	0.957967	0.0248395	1.69497		*		3
GOTERM_BP_ALL	GO:0048870~cell motility	45	2.32678	0.000936395	NRP2, JUB, CDK5R1, FGF15, BCAR1, PAX6, GJA1, ABI2, ZEB2, DNAHC11, CX3CL1, SRF, ITGB1, PTEN, TGFB1, IL17B, RSPH4A, GBX2, SEMA3C, LHX6, CHRNA7, NRG1, DCLK1, TWIST1, EGFR, RET, VAV3, FOXJ1, PODXL, ATP1A3, ITGA3, MMP14, GAS8, KDR, SMO, TNS3, CORO1A, ITGA6, CD34, CFL1, LTB4R2, LRP6, HBEGF, LAMC1, MYH10	1363	284	14219	1.65298	0.957967	0.0248395	1.69497		*		3
GOTERM_BP_ALL	GO:0030323~respiratory tube development	23	1.18925	0.000955972	CEBPA, BMP4, FGFR2, FGF18, TBX4, BMPR2, DAG1, CFTR, MMP14, GLI3, ADA, KDR, MYCN, GLI1, SPRY2, TNS3, SLC23A1, ACVR2B, ID1, LOC100047930, ZFPM2, HHIP, TRAF4	1363	113	14219	2.12335	0.960663	0.0251554	1.73012		MYCN		1
GOTERM_BP_ALL	GO:0051254~positive regulation of RNA metabolic process	61	3.15408	0.000993049	GM98, E2F3, FOXK1, ARNT2, PAX6, FOXO1, NFKB1, ZIC3, TGFB1, CITED2, GLI1, LOC100048295, GATA3, PAX8, POU4F2, FOSL1, MYC, ATF7IP, RARG, EGR2, SOX11, OTX2, RXRG, MLXIPL, MED14, TCFAP2E, MECOM, SMO, ZFP462, ZMIZ1, JUN, HIPK2, ZFPM2, SMARCA1, HMGB2, UBE3A, SOX4, SRF, SOX8, ARID2, POU2F1, NFAT5, TCEA1, POU3F1, NFATC2, BMP4, CEBPA, TRP53, KLF6, KLF7, UTF1, KLF12, MAML1, CREBBP, TEAD3, SALL4, ETS1, CSRNP…	1363	419	14219	1.51876	0.965305	0.0259172	1.79664		*		0
GOTERM_BP_ALL	GO:0010628~positive regulation of gene expression	69	3.56774	0.000999183	GM98, E2F3, FOXK1, ARNT2, PAX6, FOXO1, NFKB1, GLI3, ZIC3, TGFB1, CITED2, GLI1, LOC100048295, GATA3, PAX8, POU4F2, MKL1, FOSL1, MYC, ATF7IP, RARG, EGR2, SOX11, OTX2, MLXIPL, RXRG, MED14, TCFAP2E, MECOM, SMO, ZFP462, JUN, ZMIZ1, HIPK2, ZFPM2, SMARCA1, HMGB2, UBE3A, SOX4, SRF, SOX8, ARID2, GM3258, NFAT5, POU2F1, ETV1, TCEA1, SUPT4H1, POU3F1, NFATC2, ETV4, HMGA1-RS1, BMP4, CEBPA, TRP53, KLF6, KLF7, U…	1363	488	14219	1.47504	0.966018	0.0258758	1.80765		*		0
GOTERM_BP_ALL	GO:0045596~negative regulation of cell differentiation	32	1.6546	0.00110166	BEX1, PAX6, REST, GLI3, ITGB1, TGFB1, CD74, EPHB2, WNT4, BDNF, RHOC, MBNL3, SKIL, TWIST2, TWIST1, ZFP36, TRP53, BMP4, KLK8, FOXJ1, CREBBP, LMX1A, CTNNA1, THY1, NOTCH3, YWHAH, GDF11, PBX1, TGFB1I1, WNT9A, RBPJ, TOB2	1363	182	14219	1.83422	0.975983	0.028277	1.99129		REST		1
GOTERM_BP_ALL	GO:0048754~branching morphogenesis of a tube	20	1.03413	0.00113976	BMP4, PGF, EDN1, DAG1, MMP14, GLI3, SRF, TGFB1, KDR, MYCN, DDR1, SPRY2, WNT4, BCL2, PHB2, GBX2, NKX3-1, PBX1, PLXND1, ETV4	1363	93	14219	2.24347	0.97889	0.029021	2.05948		MYCN		1
GOTERM_BP_ALL	GO:0051129~negative regulation of cellular component organization	20	1.03413	0.00113976	KLK8, LOC100047211, MTAP2, MID1, MMP14, PTEN, TGFB1, EPHB2, ESPN, THY1, PFN1, PACSIN1, YWHAH, MTAP1A, SPNB2, SPNB1, CAPG, MTAP1B, SCIN, SPNA1	1363	93	14219	2.24347	0.97889	0.029021	2.05948		*		4
GOTERM_BP_ALL	GO:0051094~positive regulation of developmental process	36	1.86143	0.00115565	FGFR2, FGF18, FGFR3, BEX1, PAX6, GJA1, CX3CL1, GLI3, SRF, PNP, CD74, ADA, EPHB2, TAL1, METRN, BDNF, TIAM1, BCL2, POU4F2, NRG1, BMP4, SH3PXD2B, PLXNB1, CD276, VASH2, JUNB, SMO, WNT7B, TNFSF11, ID2, ETS1, LCK, WNT9A, NGFR, WNT7A, TOB2	1363	214	14219	1.75494	0.979996	0.0292003	2.08791		*		1
GOTERM_BP_ALL	GO:0045449~regulation of transcription	254	13.1334	0.00125292	CDX4, ZFP334, BBX, REST, 1700020N01RIK, CITED2, ZFP94, ZFP473, TIGD3, CREB3L1, TIGD5, TWIST2, TWIST1, PHOX2A, RARG, RCOR2, ZFP628, ZFP467, RXRG, ZHX2, MED14, MECOM, ZFP74, BAZ1A, ZFP462, JUN, PARP14, MAPK3, ZIM1, LOC100047930, CDCA7L, VGLL3, SUPT6H, ZFP619, ZFP618, PFN1, TAL1, TCF20, PBRM1, LHX6, ARNTL2, DNMT3B, NKRF, MDFI, BMP4, IKZF4, DNMT3A, KLF6, UTF1, KLF7, KLF12, SMAD7, SMAD6, MAML1, CREBBP…	1363	2227	14219	1.18983	0.985611	0.0313863	2.26175		REST, MYCN, CHD7		0
GOTERM_BP_ALL	GO:0016055~Wnt receptor signaling pathway	25	1.29266	0.00125574	ZBTB33, SOX4, CPZ, WNT4, RSPO1, FRAT1, BCL9, FZD9, FZD1, TLE4, FZD3, TLE1, CELSR2, FZD2, FZD6, SMO, SDC1, WNT7B, SFRP2, SFRP4, LRP6, TGFB1I1, WNT9A, LOC634379, WNT7A	1363	130	14219	2.00618	0.985748	0.0312249	2.26679		*		0
GOTERM_BP_ALL	GO:0045935~positive regulation of nucleobase, nucleoside, nucleotide and nucleic acid metabolic process	71	3.67115	0.0012704	GM98, E2F3, FOXK1, ARNT2, PAX6, FOXO1, NFKB1, PNP, GLI3, TGFB1, ZIC3, CITED2, GLI1, LOC100048295, GATA3, PAX8, POU4F2, MKL1, FOSL1, MYC, ATF7IP, RARG, EGR2, SOX11, OTX2, MLXIPL, RXRG, MED14, TCFAP2E, MECOM, SMO, ZFP462, JUN, ZMIZ1, HIPK2, ZFPM2, SMARCA1, HMGB2, ADORA2B, UBE3A, SOX4, SRF, SOX8, ARID2, GM3258, NFAT5, POU2F1, ETV1, TCEA1, SUPT4H1, POU3F1, NFATC2, ETV4, HMGA1-RS1, BMP4, CEBPA, TRP53,…	1363	510	14219	1.45232	0.986438	0.0313535	2.29295		*		0
GOTERM_BP_ALL	GO:0006836~neurotransmitter transport	18	0.930714	0.00129244	SYT1, CPLX1, SLC25A4, NRXN2, SYT4, SLC6A15, PARK2, RIMS2, STX1B, RIMS4, RIMS3, SLC17A7, SYN1, SLC18A3, SV2A, SLC18A1, WNT7A, CACNA1B	1363	80	14219	2.34723	0.987414	0.0316584	2.3323		*		0
GOTERM_BP_ALL	GO:0001890~placenta development	19	0.98242	0.00130668	CEBPA, MDFI, HSP90AB1, FGFR2, EGFR, CDX4, EGLN1, ADA, JUNB, CITED2, DLX3, WNT7B, PEG10, GCM1, PBRM1, PLCD1, ETNK2, EPOR, CYR61	1363	87	14219	2.27828	0.988007	0.0317719	2.35771		*		1
GOTERM_BP_ALL	GO:0080090~regulation of primary metabolic process	299	15.4602	0.0014012	ADCY1, ADCY2, ADCY7, CDX4, ADCY6, ZFP334, EDN1, BBX, REST, 1700020N01RIK, CITED2, ZFP94, ZFP473, TIGD3, CREB3L1, RAPGEF4, TIGD5, TWIST2, TWIST1, PHOX2A, RARG, RCOR2, ZFP628, RXRG, ZFP467, ZHX2, MED14, MECOM, ZFP74, BAZ1A, ZFP462, JUN, PARP14, MAPK3, ZIM1, LOC100047930, CDCA7L, VGLL3, SUPT6H, PTH1R, IGF2BP1, ZFP619, ZFP618, PFN1, TAL1, TCF20, PBRM1, LHX6, ARNTL2, DNMT3B, NKRF, MDFI, BMP4, IKZF4, D…	1363	2672	14219	1.16737	0.991293	0.0337898	2.52621		REST, MYCN, CHD7		0
GOTERM_BP_ALL	GO:0014020~primary neural tube formation	12	0.620476	0.00156874	DLC1, PFN1, ENAH, SHROOM3, LMO4, CFL1, GRLF1, ZEB2, FZD3, SUFU, FZD6, TWIST1	1363	42	14219	2.98061	0.995064	0.0374894	2.82418		*		1
GOTERM_BP_ALL	GO:0010556~regulation of macromolecule biosynthetic process	269	13.909	0.00159517	CDX4, ZFP334, BBX, REST, 1700020N01RIK, CITED2, ZFP94, ZFP473, TIGD3, CREB3L1, TIGD5, TWIST2, TWIST1, PHOX2A, ICOSL, RARG, RCOR2, ZFP628, RXRG, ZFP467, ZHX2, MED14, MECOM, ZFP74, BAZ1A, ZFP462, JUN, PARP14, MAPK3, ZIM1, LOC100047930, CDCA7L, VGLL3, SUPT6H, IGF2BP1, ZFP619, ZFP618, PFN1, TAL1, TCF20, PBRM1, LHX6, ARNTL2, DNMT3B, NKRF, MDFI, BMP4, IKZF4, DNMT3A, KLF6, UTF1, KLF7, KLF12, SMAD7, SMAD…	1363	2381	14219	1.1786	0.995487	0.0378424	2.87112		REST, MYCN, CHD7		0
GOTERM_BP_ALL	GO:0031324~negative regulation of cellular metabolic process	68	3.51603	0.00167115	FOXK1, CDX4, RBM15B, NR6A1, EDN1, HR, ZEB2, NFKB1, REST, CBX1, GLI3, TGFB1, CITED2, KCNIP3, EIF4EBP2, LOC100048295, STRA8, POU4F2, NRG1, MYC, TWIST2, KHDRBS1, ATF7IP, RARG, CTBP2, RCOR2, FOXJ1, PKIG, SOCS1, ZHX2, MLXIPL, TLE4, TLE1, IRF2BP1, PKIA, PURB, MXD4, JUN, HIPK2, ZFPM2, LCOR, MTDH, SUFU, NPAS1, OVOL1, POU2F1, SKIL, DNMT3B, MDFI, CEBPA, TRP53, IKZF4, DNMT3A, EHMT1, KLF12, JARID2, FZD1, CD2…	1363	489	14219	1.45069	0.996511	0.0393349	3.00591		REST		0
GOTERM_BP_ALL	GO:0030324~lung development	22	1.13754	0.00179625	CEBPA, BMP4, FGFR2, FGF18, TBX4, BMPR2, DAG1, CFTR, MMP14, GLI3, ADA, KDR, MYCN, GLI1, SPRY2, TNS3, SLC23A1, ACVR2B, ID1, LOC100047930, ZFPM2, HHIP	1363	111	14219	2.06763	0.997717	0.0419278	3.22744		MYCN		1
GOTERM_BP_ALL	GO:0048762~mesenchymal cell differentiation	13	0.672182	0.00183284	NRP2, FGFR2, SMO, RET, FGF15, BCL2, CFL1, EDN1, GBX2, SEMA3C, ZEB2, RBPJ, TGFB1	1363	49	14219	2.76771	0.997983	0.0424715	3.29215		*		1
GOTERM_BP_ALL	GO:0001654~eye development	28	1.44778	0.00193502	PAX6, ABI2, NHS, GLI3, TGFB1, EPHB2, MIP, LOC100048295, CHD7, PVRL1, POU2F1, POU4F2, SKIL, COL8A2, GNAT1, BMP4, RARG, BHLHE22, OTX2, CACNA1S, GNAT2, THY1, MIAT, GDF11, LRP6, GRLF1, NEUROD1, MYH10	1363	157	14219	1.86051	0.998573	0.0444839	3.47265		CHD7		1
GOTERM_BP_ALL	GO:0065008~regulation of biological quality	137	7.08376	0.00198196	SYT1, SLC9A7, SYT4, PTGS2, EDN1, GNA12, CRABP2, ILDR2, TGFB1, SYP, WNT4, BDNF, GRIN2D, CHRNA7, RAPGEF4, SLC4A4, RAB27A, STIM2, F8, MLXIPL, MYH6, MECOM, BCL2L11, RPS19, CPE, F5, PDE5A, HSD11B2, ABAT, EMP3, AKAP2, KCNMB4, LOC100047211, ADORA2B, RBP1, TMX4, PTH1R, BMPR2, SOX4, HSPA1A, HSPA1B, RIMS2, SRF, ADA, EPHB2, PFN1, TAL1, ECE1, PROCR, SPNB2, TRO, SPNB1, SKIL, TRP53, BMP4, TRPC1, SMAD7, ACACA, …	1363	1123	14219	1.27266	0.998783	0.0452321	3.55545		*		0
GOTERM_BP_ALL	GO:0031325~positive regulation of cellular metabolic process	85	4.39504	0.00201792	HSP90AB1, GM98, E2F3, FOXK1, ARNT2, TLR2, PAX6, FOXO1, TLR3, EIF5A, NFKB1, PNP, GLI3, TGFB1, ZIC3, RAET1B, CITED2, GLI1, RAET1A, LOC100048295, GATA3, PAX8, POU4F2, MKL1, FOSL1, MYC, LTB, SPN, GHR, ATF7IP, ICOSL, EGR2, RARG, SOX11, OTX2, MLXIPL, RXRG, MED14, TCFAP2E, MECOM, SMO, ZFP462, JUN, ZMIZ1, HIPK2, ZFPM2, SMARCA1, HMGB2, FGFR3, ADORA2B, UBE3A, BMPR2, SOX4, LIN28A, SRF, ARID2, SOX8, GM3258, …	1363	644	14219	1.37691	0.998923	0.0457265	3.61885		*		0
GOTERM_BP_ALL	GO:0007160~cell-matrix adhesion	13	0.672182	0.00220522	DLC1, JUB, ITGB3, COL5A3, ITGB1, BCL2L11, THY1, ARHGAP6, SNED1, ITGA6, ITGB8, BCL2, TEK	1363	50	14219	2.71236	0.999429	0.0495371	3.94839		*		4
GOTERM_BP_ALL	GO:0060485~mesenchyme development	13	0.672182	0.00220522	NRP2, FGFR2, SMO, RET, FGF15, BCL2, CFL1, EDN1, GBX2, SEMA3C, ZEB2, RBPJ, TGFB1	1363	50	14219	2.71236	0.999429	0.0495371	3.94839		*		1
GOTERM_BP_ALL	GO:0034330~cell junction organization	10	0.517063	0.00242398	DLC1, JUB, ARHGAP6, ITGA5, BCL2, GNPAT, LAMC1, ITGB3, CTNNA1, THY1	1363	32	14219	3.26004	0.999728	0.0539642	4.33193		*		4
GOTERM_BP_ALL	GO:0043687~post-translational protein modification	129	6.67011	0.00251962	GNA14, C230081A13RIK, TGFB1, MLKL, EGFR, RET, PTPRF, SKP2, RPS6KC1, PTPRU, PTPRN, CDKL2, STK4, CDKL5, PLCE1, CDKL1, TRIM32, MAPK3, ROR1, BMP2K, NEK4, LRRK1, USP17L5, FGFR2, LOC100045551, FGFR3, ERBB3, STK10, SSH2, BMPR2, UBE2V1, MAPKAPK2, CD74, EPHB2, CAMKV, 2610018G03RIK, SPNB2, TEK, TEC, MDFI, PTPN9, EHMT1, SMAD7, CREBBP, PTPN4, PTPN14, MOBKL1A, PTPN13, TRIO, EPHA1, EPHA2, KDR, EPHA4, PLK5, IKB…	1363	1055	14219	1.27559	0.999803	0.0556699	4.49917		*		0
GOTERM_BP_ALL	GO:0006470~protein amino acid dephosphorylation	22	1.13754	0.00252379	LOC100045551, PTPN9, PTPRF, PTPRZ1, SSH2, PTPN4, PTPN14, PTPN13, PTPRU, PTPRN, PTEN, DUSP5, PPM1G, DUSP3, DUSP2, DUSP26, DUSP27, BCL2, PTPN1, DUSP9, DUSP8, DUSP6	1363	114	14219	2.01322	0.999806	0.0553982	4.50644		*		0
GOTERM_BP_ALL	GO:0060255~regulation of macromolecule metabolic process	298	15.4085	0.00254522	CDX4, ZFP334, BBX, REST, 1700020N01RIK, CITED2, ZFP94, ZFP473, TIGD3, CREB3L1, RAPGEF4, TIGD5, TWIST2, TWIST1, PHOX2A, ICOSL, RARG, RCOR2, ZFP628, SKP2, RXRG, ZFP467, ZHX2, MED14, MECOM, ZFP74, BAZ1A, ZFP462, JUN, PARP14, MAPK3, ZIM1, LOC100047930, CDCA7L, VGLL3, SUPT6H, IGF2BP1, ZFP619, ZFP618, PFN1, TAL1, TCF20, PBRM1, LHX6, ARNTL2, DNMT3B, TDRD1, NKRF, MDFI, BMP4, IKZF4, DNMT3A, KLF6, UTF1, KL…	1363	2688	14219	1.15654	0.99982	0.0554965	4.54388		REST, MYCN, CHD7		0
GOTERM_BP_ALL	GO:0007178~transmembrane receptor protein serine/threonine kinase signaling pathway	17	0.879007	0.00259878	TRP53, BMP4, LTBP1, SMAD7, SMAD6, BMPR2, TGFB1, MSX2, ACVR2B, ID1, SPNB2, HIPK2, SKIL, AKAP2, BMP8B, BMP6, BMP8A	1363	78	14219	2.27367	0.99985	0.0562702	4.63737		*		0
GOTERM_BP_ALL	GO:0043010~camera-type eye development	24	1.24095	0.00278414	BMP4, BHLHE22, PAX6, ABI2, NHS, GLI3, CACNA1S, TGFB1, EPHB2, THY1, GNAT2, MIP, LOC100048295, CHD7, PVRL1, LRP6, GRLF1, POU2F1, GDF11, POU4F2, NEUROD1, SKIL, COL8A2, MYH10	1363	130	14219	1.92593	0.99992	0.0597847	4.96024		CHD7		1
GOTERM_BP_ALL	GO:0065009~regulation of molecular function	73	3.77456	0.00282532	JUB, ADCY1, ADCY2, ADCY7, ADCY6, EDN1, TLR2, TLR3, ZEB2, LATS2, SPRY4, TGFB1, SPRY2, ARHGAP6, GPR44, HMOX1, SH3D20, SPRED2, SPRED3, TGFA, SPRED1, NRG1, MYC, DHCR24, PTGER4, FOXJ1, PKIG, STIM2, MYH6, PKIA, FLNA, JMY, THY1, SMO, PLCE1, ACVR2B, CHRM4, ZFP462, LCK, HIPK2, MAPK3, GRM6, NRK, GADD45A, CALCR, HMGB2, MTDH, ADORA2B, PTH1R, HSPA1A, SFN, HSPA1B, CD74, TRIB1, RASGRP3, ARG2, BCL2, MDFI, TRP53,…	1363	544	14219	1.3999	0.99993	0.060261	5.03183		*		0
GOTERM_BP_ALL	GO:0035023~regulation of Rho protein signal transduction	18	0.930714	0.00292974	FGD2, VAV3, FOXJ1, PREX2, ARHGEF5, TRIO, AKAP13, ARHGEF17, ARHGEF9, RGNEF, ARHGEF10, PLEKHG2, TIAM1, SH3D20, ARAP3, FGD5, SPATA13, E130112L23RIK	1363	86	14219	2.18347	0.999951	0.0620305	5.21313		*		0
GOTERM_BP_ALL	GO:0007417~central nervous system development	53	2.74043	0.00293921	DLC1, GM98, ARNT2, PAX6, ZEB2, GLI3, PTEN, CITED2, GLI1, SLC23A1, GNPAT, SEPP1, PHOX2A, EGFR, IRS2, C2CD3, EGR2, CYP11A1, OTX2, MECOM, BBS2, SMO, NGFR, SMARCA1, FGFR2, CDK5R1, FGFR3, SOX3, SUFU, EPHB2, TPM3, BCL2, GBX2, LHX6, DCLK1, BMP4, TRP53, HSPG2, EN1, LMX1A, RGNEF, NOTCH3, GCM1, PHGDH, GDF11, GRLF1, NEUROD1, EPOR, PBX3, RBPJ, LRP2, WNT7A, MYH10	1363	369	14219	1.49838	0.999953	0.0618386	5.22956		*		1
GOTERM_BP_ALL	GO:0030855~epithelial cell differentiation	23	1.18925	0.00295962	COL18A1, FGFR2, SHROOM3, PTGS2, PPHLN1, PAX6, FZD1, GJA1, FZD2, SFN, KDR, WNT4, LOC100048295, EVPL, ID1, PPL, JUN, TGM1, TGM3, TGFB1I1, ID3, POU3F1, RBPJ	1363	123	14219	1.95072	0.999956	0.0618709	5.26495		*		1
GOTERM_BP_ALL	GO:0001843~neural tube closure	11	0.568769	0.00300429	DLC1, PFN1, ENAH, SHROOM3, LMO4, GRLF1, ZEB2, FZD3, SUFU, FZD6, TWIST1	1363	39	14219	2.9424	0.999962	0.0623915	5.34237		*		1
GOTERM_BP_ALL	GO:0060606~tube closure	11	0.568769	0.00300429	DLC1, PFN1, ENAH, SHROOM3, LMO4, GRLF1, ZEB2, FZD3, SUFU, FZD6, TWIST1	1363	39	14219	2.9424	0.999962	0.0623915	5.34237		*		1
GOTERM_BP_ALL	GO:0043086~negative regulation of catalytic activity	20	1.03413	0.00309877	CFLAR, PKIG, HSPA1A, HSPA1B, PKIA, LATS2, SPRY4, FLNA, THY1, SH3BP5, SPRY2, CHRM4, GPR44, ARG2, GRM6, SPRED2, SPRED3, SPRED1, DUSP9, GADD45A, DHCR24	1363	101	14219	2.06577	0.999972	0.063901	5.50592		*		0
GOTERM_BP_ALL	GO:0045165~cell fate commitment	26	1.34436	0.00324943	FGFR2, JAG2, PAX6, ITGB1, SOX8, GLI3, SPRY2, TAL1, BCL2, GATA3, POU2F1, LHX6, NRG1, TRP53, BMP4, OTX2, DLL3, FOXN4, KDR, NOTCH3, SMO, GCM1, NEUROD1, TGFB1I1, RBPJ, GAP43	1363	147	14219	1.84514	0.999983	0.0665025	5.76617		*		1
GOTERM_BP_ALL	GO:0042306~regulation of protein import into nucleus	8	0.41365	0.00341678	SMO, PKIG, TRIP6, PKIA, GLI3, TGFB1, SUFU, FLNA	1363	22	14219	3.7935	0.999991	0.0693925	6.05445		*		0
GOTERM_BP_ALL	GO:0048592~eye morphogenesis	16	0.827301	0.00342816	GNAT1, BMP4, RARG, BHLHE22, OTX2, PAX6, GLI3, EPHB2, GNAT2, THY1, PVRL1, MIAT, LRP6, POU2F1, GDF11, COL8A2	1363	73	14219	2.2865	0.999991	0.0692013	6.07403		*		1
GOTERM_BP_ALL	GO:0040011~locomotion	52	2.68873	0.00360815	NRP2, JUB, FGF15, BCAR1, PAX6, GJA1, ZEB2, PTEN, TGFB1, ROBO1, RSPH4A, GPR44, SEMA3C, CHRNA7, NRG1, TWIST1, CYR61, EGFR, RET, FOXJ1, MMP14, TNS3, SMO, CD34, CFL1, LAMC1, CDK5R1, CYSLTR1, ENPP2, ABI2, DNAHC11, CX3CL1, ITGB1, SRF, DOCK2, IL17B, GBX2, LHX6, DCLK1, VAV3, PODXL, ATP1A3, ITGA3, GAS8, KDR, CORO1A, ITGA6, ECSCR, LTB4R2, LRP6, HBEGF, MYH10	1363	364	14219	1.4903	0.999995	0.0722761	6.3831		*		3
GOTERM_BP_ALL	GO:0008544~epidermis development	23	1.18925	0.00363055	FRAS1, EGFR, PTGS2, PPHLN1, PAX6, SFN, COL5A2, SUFU, COL5A1, EVPL, PPL, BCL2, OVOL1, TGM1, TGM3, NGFR, POU3F1, RBPJ, WNT7A, LTB, RUNX3, TCF15, DHCR24	1363	125	14219	1.91951	0.999995	0.072282	6.4215		*		1
GOTERM_BP_ALL	GO:0001763~morphogenesis of a branching structure	23	1.18925	0.00363055	FGFR2, BMP4, PGF, EDN1, DAG1, MMP14, GLI3, SRF, TGFB1, KDR, MYCN, DDR1, SPRY2, WNT4, GCM1, BCL2, PHB2, GBX2, NKX3-1, SEMA3C, PBX1, PLXND1, ETV4	1363	125	14219	1.91951	0.999995	0.072282	6.4215		MYCN		1
GOTERM_BP_ALL	GO:0051128~regulation of cellular component organization	48	2.4819	0.00369029	STON2, LOC100047211, SHROOM3, STON1, GNA12, EIF5A, SRF, PTEN, TGFB1, EPHB2, ESPN, PFN1, METRN, PACSIN1, CUL7, TIAM1, SPNB2, SPNB1, TGFA, LTB, ATF7IP, TRP53, KLK8, ACTN4, PLXNB1, MTAP2, NEXN, MMP14, MID1, COL5A1, THY1, CORO1A, YWHAH, MTAP1A, CFL1, ITGA7, MTAP1B, SCIN, CAPG, GRLF1, SPNA1, MYH14, NCAN, BIN1, ARAP3, AKAP2, WNT7A, MYH10	1363	330	14219	1.5174	0.999996	0.0730003	6.52383		*		4
GOTERM_BP_ALL	GO:0060348~bone development	22	1.13754	0.00386687	FGFR2, BMP4, FGF18, BMP1, RARG, PDLIM7, PTGS2, PTH1R, HSPG2, MMP14, MMP2, SMO, TNFSF11, BCL2, ANKRD11, PTN, SORT1, PAPSS2, RPS27A, BMP8B, BMP6, BMP8A	1363	118	14219	1.94497	0.999998	0.075921	6.82568		*		1
GOTERM_BP_ALL	GO:0003007~heart morphogenesis	16	0.827301	0.00392776	DLC1, C2CD3, SMAD7, GJA1, EGLN1, SRF, TPM1, SUFU, ZIC3, COL5A1, MSX2, SMO, CHD7, ZMIZ1, ADAMTS1, COL11A1	1363	74	14219	2.2556	0.999998	0.0766282	6.92956		CHD7		1
GOTERM_BP_ALL	GO:0010604~positive regulation of macromolecule metabolic process	82	4.23992	0.00405091	GM98, E2F3, FOXK1, ARNT2, PAX6, FOXO1, EIF5A, TLR3, NFKB1, PNP, GLI3, TGFB1, ZIC3, CITED2, GLI1, LOC100048295, GATA3, PAX8, POU4F2, MKL1, FOSL1, MYC, LTB, SPN, GHR, ATF7IP, ICOSL, EGR2, RARG, SOX11, OTX2, MLXIPL, RXRG, MED14, TCFAP2E, MECOM, SMO, ZFP462, JUN, ZMIZ1, TRIM32, HIPK2, ZFPM2, SMARCA1, HMGB2, FGFR3, UBE3A, BMPR2, SOX4, LIN28A, SRF, SOX8, ARID2, GM3258, BCL2, NFAT5, POU2F1, ETV1, TCEA1,…	1363	633	14219	1.3514	0.999999	0.0784871	7.1393		*		0
GOTERM_BP_ALL	GO:0014031~mesenchymal cell development	12	0.620476	0.00409451	NRP2, SMO, RET, FGF15, BCL2, EDN1, CFL1, GBX2, SEMA3C, ZEB2, RBPJ, TGFB1	1363	47	14219	2.66352	0.999999	0.0788489	7.21346		*		1
GOTERM_BP_ALL	GO:0048041~focal adhesion formation	5	0.258532	0.00427784	DLC1, JUB, ARHGAP6, BCL2, THY1	1363	8	14219	6.52008	0.999999	0.0817739	7.52464		*		4
GOTERM_BP_ALL	GO:0007267~cell-cell signaling	43	2.22337	0.0043393	FGFR2, SYT1, CPLX1, SYT4, GJA1, CACNB2, ILDR2, RIMS2, VGF, GLI1, SYP, WNT4, BDNF, SYN1, GRIN2D, POU2F1, APBA2, CHRNA7, RAPGEF4, SV2A, NRG1, BMP4, KLK8, NRXN2, SLC25A4, STXBP1, FZD1, PARK2, GRIA4, FZD2, STX1B, SLC17A7, SMO, WNT7B, ACVR2B, STAB1, GRM6, TMOD2, ABAT, NCAN, WNT7A, SMPD3, CACNA1B	1363	290	14219	1.54683	1	0.0824369	7.62875		*		0
GOTERM_BP_ALL	GO:0051272~positive regulation of cell motion	11	0.568769	0.0044432	COL18A1, PRR5, CORO1A, IRS2, ACTN4, BCL2, BCAR1, LAMB1-1, TLR2, HBEGF, ARHGAP8, TRIP6	1363	41	14219	2.79887	1	0.0838602	7.80448		*		3
GOTERM_BP_ALL	GO:0001755~neural crest cell migration	8	0.41365	0.00451141	NRP2, SMO, RET, FGF15, CFL1, GBX2, SEMA3C, ZEB2	1363	23	14219	3.62857	1	0.0846236	7.91968		*		3
GOTERM_BP_ALL	GO:0030326~embryonic limb morphogenesis	19	0.98242	0.00456692	BMP4, RARG, C2CD3, TBX4, GNA12, CRABP2, EN1, PRRX2, MECOM, GLI3, MSX2, SALL4, CHD7, ZFP697, LRP6, PBX1, WNT9A, WNT7A, TWIST1	1363	97	14219	2.04341	1	0.0851506	8.01332		CHD7		1
GOTERM_BP_ALL	GO:0035113~embryonic appendage morphogenesis	19	0.98242	0.00456692	BMP4, RARG, C2CD3, TBX4, GNA12, CRABP2, EN1, PRRX2, MECOM, GLI3, MSX2, SALL4, CHD7, ZFP697, LRP6, PBX1, WNT9A, WNT7A, TWIST1	1363	97	14219	2.04341	1	0.0851506	8.01332		CHD7		1
GOTERM_BP_ALL	GO:0045597~positive regulation of cell differentiation	29	1.49948	0.00468851	FGF18, FGFR3, BEX1, PAX6, GLI3, SRF, PNP, ADA, CD74, EPHB2, TAL1, BDNF, METRN, TIAM1, BCL2, POU4F2, NRG1, SH3PXD2B, BMP4, PLXNB1, CD276, JUNB, SMO, WNT7B, TNFSF11, ID2, ETS1, LCK, WNT9A	1363	175	14219	1.72875	1	0.0868441	8.21813		*		1
GOTERM_BP_ALL	GO:0009893~positive regulation of metabolic process	87	4.49845	0.00483639	HSP90AB1, GM98, E2F3, FOXK1, ARNT2, TLR2, PAX6, FOXO1, TLR3, EIF5A, NFKB1, PNP, GLI3, TGFB1, ZIC3, RAET1B, CITED2, GLI1, RAET1A, LOC100048295, GATA3, PAX8, POU4F2, MKL1, FOSL1, MYC, LTB, SPN, GHR, ATF7IP, ICOSL, EGR2, RARG, SOX11, OTX2, MLXIPL, RXRG, MED14, TCFAP2E, MECOM, SMO, ZFP462, JUN, ZMIZ1, TRIM32, HIPK2, ZFPM2, SMARCA1, HMGB2, FGFR3, ADORA2B, UBE3A, BMPR2, SOX4, LIN28A, SRF, ARID2, SOX8, …	1363	683	14219	1.32884	1	0.0889783	8.46665		*		0
GOTERM_BP_ALL	GO:0051494~negative regulation of cytoskeleton organization	12	0.620476	0.0048618	PFN1, LOC100047211, MTAP2, SPNB2, MTAP1A, SPNB1, SCIN, CAPG, MTAP1B, SPNA1, MID1, ESPN	1363	48	14219	2.60803	1	0.0889434	8.50929		*		4
GOTERM_BP_ALL	GO:0001701~in utero embryonic development	40	2.06825	0.00505186	FGFR2, EDN1, GNA12, ARNT2, GJA1, EGLN1, GLI3, TPM1, ITGB1, SOX8, SRF, ADA, CITED2, CHD7, DNMT3L, ANKRD11, APBA2, ETNK2, PLCD1, SKIL, CYR61, ENO1, CEBPA, EGFR, TRP53, MDFI, C2CD3, GM5506, DLL3, MYH6, CAPN2, MECOM, JUNB, BCL2L11, WNT7B, GCM1, SALL4, ZMIZ1, HBEGF, ZFPM2, MYH10	1363	267	14219	1.56287	1	0.0917694	8.82761		CHD7		1
GOTERM_BP_ALL	GO:0008277~regulation of G-protein coupled receptor protein signaling pathway	8	0.41365	0.00585103	PLD2, PLCE1, LOC100046186, ECE1, ARRB1, GPR44, TMOD2, GRK5	1363	24	14219	3.47738	1	0.104977	10.1547		*		0
GOTERM_BP_ALL	GO:0050678~regulation of epithelial cell proliferation	14	0.723888	0.00599161	EGFR, FGFR2, BMP4, FGFR3, PHB2, PAX6, NKX3-1, LOC100047930, TGFA, PTEN, RUNX3, TGFB1, ETV4, KDR	1363	63	14219	2.31825	1	0.106803	10.3863		*		3
GOTERM_BP_ALL	GO:0016337~cell-cell adhesion	36	1.86143	0.00601523	CDK5R1, CLSTN3, CLDN6, CLDN5, L1CAM, CDH3, PVRL4, PCDH1, CDH9, PVRL1, FAT1, BCL2, PVRL2, TEK, ESAM, ADAM8, COL11A1, CDH24, CYR61, RET, PTPRF, CELSR2, PTPRU, PCDH17, GPR98, THY1, AMIGO2, WNT7B, ITGA6, PKP2, ITGA5, CLDN1, CYFIP2, NCAN, CDH10, CDH11	1363	236	14219	1.59134	1	0.106642	10.4251		*		4
GOTERM_BP_ALL	GO:0043244~regulation of protein complex disassembly	11	0.568769	0.0063757	MTAP2, SPNB2, MTAP1A, SPNB1, CFL1, SCIN, CAPG, MTAP1B, EIF5A, SPNA1, MID1	1363	43	14219	2.66869	1	0.112095	11.016		*		0
GOTERM_BP_ALL	GO:0001666~response to hypoxia	14	0.723888	0.00687603	ACTN4, ARNT2, EDN1, CAPN2, MMP14, MMP2, TGFB1, SCAP, CITED2, ECE1, HMOX1, BCL2, PDE5A, HIF3A	1363	64	14219	2.28203	1	0.119752	11.8301		*		0
GOTERM_BP_ALL	GO:0031589~cell-substrate adhesion	13	0.672182	0.00688389	DLC1, JUB, ITGB3, COL5A3, ITGB1, BCL2L11, THY1, ARHGAP6, SNED1, ITGA6, ITGB8, BCL2, TEK	1363	57	14219	2.37926	1	0.11927	11.8428		*		4
GOTERM_BP_ALL	GO:0016044~membrane organization	40	2.06825	0.00689142	STON2, CAV2, STON1, UBE3A, GULP1, SYP, AP1S3, DOCK2, PACSIN1, DYSF, BCL2, SH3D20, DLG4, GNPAT, CHRNA7, EHD1, EHD2, UPK2, DHCR24, GHR, MRC1, TRP53, PLD2, ARC, VAV3, HCK, MRC2, STXBP1, ITGA3, KCNN4, TIMM8A1, IRF8, LRP6, SH3KBP1, RIN2, SORT1, BIN1, LRP2, CLCN5, MYH10	1363	272	14219	1.53414	1	0.118787	11.855		*		4
GOTERM_BP_ALL	GO:0030335~positive regulation of cell migration	10	0.517063	0.00695535	COL18A1, PRR5, CORO1A, IRS2, BCL2, BCAR1, LAMB1-1, TLR2, HBEGF, ARHGAP8, TRIP6	1363	37	14219	2.8195	1	0.11922	11.9585		*		3
GOTERM_BP_ALL	GO:0051051~negative regulation of transport	15	0.775595	0.00766557	PFKL, EDN1, PKIG, STIM2, PEA15A, PKIA, ADA, FLNA, SUFU, TGFB1, PACSIN1, GRB10, BCL2, HMOX1, LTB	1363	72	14219	2.17336	1	0.129956	13.1005		*		0
GOTERM_BP_ALL	GO:0007398~ectoderm development	23	1.18925	0.00771229	FRAS1, EGFR, PTGS2, PPHLN1, PAX6, SFN, COL5A2, SUFU, COL5A1, EVPL, PPL, BCL2, OVOL1, TGM1, TGM3, NGFR, POU3F1, RBPJ, WNT7A, LTB, RUNX3, TCF15, DHCR24	1363	133	14219	1.80405	1	0.130049	13.1751		*		1
GOTERM_BP_ALL	GO:0006575~cellular amino acid derivative metabolic process	24	1.24095	0.00775102	ODC1, KYNU, OCLN, SNCB, GATM, EIF5A, GSTT1, PARK2, MOXD1, SLC1A3, HDC, GSTK1, GATA3, GPX3, PHGDH, PEMT, ABAT, ETNK2, CHRNA7, SMS, FABP5, MGST1, ALDH9A1, GHR	1363	141	14219	1.77568	1	0.130015	13.2369		*		0
GOTERM_BP_ALL	GO:0007610~behavior	55	2.84385	0.00777369	NRP2, ADCY1, CNP, KCNIP3, S1PR2, BDNF, SLC1A3, ROBO1, GRIN2D, GPR44, DLG4, CHRNA7, SEPP1, NRG1, CYR61, EGR2, CYP11A1, EFNB3, PRKCE, BBS2, HIPK2, GRM6, LAMB1-1, ABAT, CYSLTR1, ENPP2, ABI2, CX3CL1, EPHB2, ESPN, NPAS1, DOCK2, CHD7, IL17B, BCL2, SCN9A, APBA2, ETV1, PTN, FZD9, KLK8, GABRA5, ATP1A3, ITGA3, PARK2, ACCN2, EPHA4, CORO1A, PENK, ITGA5, ECSCR, TMOD2, PBX3, TCF15, CACNA1B	1363	405	14219	1.41671	1	0.129731	13.2731		CHD7		0
GOTERM_BP_ALL	GO:0070482~response to oxygen levels	14	0.723888	0.0078608	ACTN4, ARNT2, EDN1, CAPN2, MMP14, MMP2, TGFB1, SCAP, CITED2, ECE1, HMOX1, BCL2, PDE5A, HIF3A	1363	65	14219	2.24692	1	0.130451	13.4119		*		0
GOTERM_BP_ALL	GO:0033673~negative regulation of kinase activity	12	0.620476	0.00786217	SH3BP5, SPRY2, PKIG, SPRED2, SPRED3, SPRED1, DUSP9, PKIA, GADD45A, LATS2, SPRY4, THY1	1363	51	14219	2.45462	1	0.129839	13.4141		*		0
GOTERM_BP_ALL	GO:0006469~negative regulation of protein kinase activity	12	0.620476	0.00786217	SH3BP5, SPRY2, PKIG, SPRED2, SPRED3, SPRED1, DUSP9, PKIA, GADD45A, LATS2, SPRY4, THY1	1363	51	14219	2.45462	1	0.129839	13.4141		*		0
GOTERM_BP_ALL	GO:0032501~multicellular organismal process	455	23.5264	0.00787048	DLC1, PTGS2, PGF, L1CAM, REST, CITED2, SYP, SERPINE2, CUL7, GRIN2D, CUL1, RAB27A, INA, PHOX2A, ICOSL, ARC, PTPRF, GATM, TMIE, KIF5C, RXRG, F8, MYH6, MECOM, CTNNA1, BCL2L11, THY1, PLAUR, RPS19, TAGLN, F5, JUN, MAPK3, ABAT, HSD11B2, ADAMTS1, ERBB3, PTH1R, CACNB2, HSPA1A, HSPA1B, PFN1, PROCR, PVRL1, ARG2, DNMT3L, PVRL2, DNMT3B, LFNG, UNC45B, ODC1, DNMT3A, ACACA, CLGN, RGS2, PENK, PKP2, BMP8B, BMP8A,…	1363	4329	14219	1.09647	1	0.12934	13.4273		REST, MYCN, CHD7		0
GOTERM_BP_ALL	GO:0048568~embryonic organ development	36	1.86143	0.00831685	FGFR2, EDN1, EGLN1, PRRX2, GLI3, ADA, CITED2, GLI1, SPRY2, CHD7, CHRNA9, GBX2, PLCD1, COL11A1, MYC, CYR61, OTOP1, CEBPA, BMP4, EGFR, MDFI, RARG, TMIE, OTX2, HSPG2, FZD3, JUNB, EPHA2, FZD6, WNT7B, GCM1, LRP6, NEUROD1, PBX1, ZFPM2, WNT9A	1363	241	14219	1.55833	1	0.135529	14.1353		CHD7		1
GOTERM_BP_ALL	GO:0007389~pattern specification process	41	2.11996	0.00843565	FGFR2, SHROOM3, EDN1, PAX6, BMPR2, ZEB2, DNAHC11, GLI3, SRF, ZIC3, SUFU, CITED2, GLI1, GBX2, FRAT1, NKX3-1, HHIP, PLXND1, LFNG, BMP4, MDFI, TRP53, ARC, C2CD3, EGR2, RARG, FOXJ1, OTX2, DLL3, EN1, CELSR2, SMO, ACVR2B, SFRP2, HIPK2, LRP6, GDF11, NEUROD1, PBX1, WNT7A, TCF15	1363	284	14219	1.50605	1	0.136679	14.3228		*		0
GOTERM_BP_ALL	GO:0030799~regulation of cyclic nucleotide metabolic process	15	0.775595	0.00867106	CALCR, GUCA1A, ADCY1, ADCY2, ADORA2B, PTGER4, ADCY7, PTH1R, ADCY6, EDN1, TIMP2, FLNA, CHRM4, GPR44, GRM6	1363	73	14219	2.14359	1	0.139565	14.6932		*		0
GOTERM_BP_ALL	GO:0019935~cyclic-nucleotide-mediated signaling	14	0.723888	0.00895342	GNAT1, CALCR, ADCY2, PTGER4, ADORA2B, PTH1R, RIMS2, FLNA, GNAT2, CHRM4, EIF4EBP2, GPR44, GRM6, RAPGEF4	1363	66	14219	2.21288	1	0.14311	15.1355		*		0
GOTERM_BP_ALL	GO:0009123~nucleoside monophosphate metabolic process	13	0.672182	0.00912368	ADCY1, ADCY2, ADCY7, ATIC, ADCY6, PDE5A, PDE4D, CNP, GUCY1B3, BC048355, IMPDH1, PRPS2, ADA	1363	59	14219	2.29861	1	0.144955	15.4012		*		0
GOTERM_BP_ALL	GO:0042063~gliogenesis	12	0.620476	0.00913033	GM98, FGF5, METRN, EGR2, GCM1, ERBB3, PHGDH, PAX6, POU3F1, MMP14, NRG1, GAP43	1363	52	14219	2.40742	1	0.14438	15.4115		*		0
GOTERM_BP_ALL	GO:0009582~detection of abiotic stimulus	12	0.620476	0.00913033	GNAT1, TUB, GUCA1A, CHRNA9, ARRB1, GRIN2D, NR2F6, NGFR, MYC, GPR98, OTOP1, GNAT2	1363	52	14219	2.40742	1	0.14438	15.4115		*		0
GOTERM_BP_ALL	GO:0006464~protein modification process	146	7.54912	0.0094397	GNA14, EIF5A, C230081A13RIK, TGFB1, ST3GAL5, B3GALNT1, MLKL, EGFR, RET, PTPRF, SKP2, RPS6KC1, PTPRU, PTPRN, STK4, CDKL2, CDKL5, PLCE1, CDKL1, ASPHD2, TRIM32, MAPK3, BMP2K, ROR1, NEK4, LRRK1, USP17L5, LOC100045551, FGFR2, FGFR3, ERBB3, STK10, SSH2, BMPR2, ST8SIA1, UBA6, UBE2V1, ST8SIA3, MAPKAPK2, CD74, EPHB2, CAMKV, 2610018G03RIK, SPNB2, B3GNT7, TEK, TEC, MDFI, ST6GAL1, PTPN9, EHMT1, SMAD7, PTPN4,…	1363	1260	14219	1.2088	1	0.148223	15.8922		*		0
GOTERM_BP_ALL	GO:0044057~regulation of system process	31	1.6029	0.0095523	GM98, ADORA2B, CALD1, EDN1, BMPR2, NCS1, GJA1, TPM1, ADA, EPHB2, SYP, ANXA6, BDNF, SLC1A3, GRIN2D, DLG4, CHRNA7, CAMK2A, LTB, KLK8, EGR2, SMAD7, STXBP1, PARK2, MYH6, TBXA2R, CACNA1G, HBEGF, PBX3, F2R, CACNA1B	1363	201	14219	1.60894	1	0.149173	16.0664		*		0
GOTERM_BP_ALL	GO:0051101~regulation of DNA binding	15	0.775595	0.00977783	MDFI, SMO, HMGB2, MTDH, ZFP462, FOXJ1, HMOX1, HIPK2, CREBBP, MAPK3, TLR2, TLR3, TGFB1, FLNA, JMY	1363	74	14219	2.11462	1	0.151733	16.4145		*		0
GOTERM_BP_ALL	GO:0007611~learning or memory	17	0.879007	0.00984112	FZD9, KLK8, ADCY1, EGR2, GABRA5, ATP1A3, ABI2, ITGA3, PARK2, EPHB2, ACCN2, BDNF, ITGA5, LAMB1-1, TMOD2, PTN, CHRNA7	1363	89	14219	1.99265	1	0.151949	16.5119		*		0
GOTERM_BP_ALL	GO:0030814~regulation of cAMP metabolic process	14	0.723888	0.0101616	CALCR, ADCY1, ADCY2, CHRM4, ADORA2B, ADCY7, PTGER4, GPR44, GRM6, EDN1, ADCY6, PTH1R, TIMP2, FLNA	1363	67	14219	2.17985	1	0.155808	17.0036		*		0
GOTERM_BP_ALL	GO:0030902~hindbrain development	14	0.723888	0.0101616	PHOX2A, DLC1, EGR2, CYP11A1, EN1, LMX1A, GLI1, SMO, BCL2, GBX2, GNPAT, NEUROD1, WNT7A, MYH10	1363	67	14219	2.17985	1	0.155808	17.0036		*		1
GOTERM_BP_ALL	GO:0022604~regulation of cell morphogenesis	18	0.930714	0.0102327	KLK8, SHROOM3, PLXNB1, GNA12, EPHB2, THY1, METRN, CORO1A, YWHAH, TIAM1, ITGA7, GRLF1, SPNA1, MYH14, ARAP3, AKAP2, WNT7A, MYH10	1363	97	14219	1.93586	1	0.156111	17.1124		*		1
GOTERM_BP_ALL	GO:0032844~regulation of homeostatic process	13	0.672182	0.0104375	CALCR, GM98, TAL1, KLK8, SMAD7, ETS1, BCL2, LCK, CACNA1G, ADA, TGFB1, F2R, THY1	1363	60	14219	2.2603	1	0.158281	17.4248		*		0
GOTERM_BP_ALL	GO:0051348~negative regulation of transferase activity	12	0.620476	0.0105507	SH3BP5, SPRY2, PKIG, SPRED2, SPRED3, SPRED1, DUSP9, PKIA, GADD45A, LATS2, SPRY4, THY1	1363	53	14219	2.36199	1	0.159154	17.597		*		0
GOTERM_BP_ALL	GO:0030278~regulation of ossification	12	0.620476	0.0105507	BMP4, CALCR, WNT7B, EGR2, PTGER4, BCL2, CD276, BMP2K, PBX1, TWIST2, TGFB1, TOB2	1363	53	14219	2.36199	1	0.159154	17.597		*		1
GOTERM_BP_ALL	GO:0014033~neural crest cell differentiation	9	0.465357	0.0109393	NRP2, SMO, RET, FGF15, EDN1, CFL1, GBX2, SEMA3C, ZEB2	1363	33	14219	2.84513	1	0.163811	18.1855		*		1
GOTERM_BP_ALL	GO:0014032~neural crest cell development	9	0.465357	0.0109393	NRP2, SMO, RET, FGF15, EDN1, CFL1, GBX2, SEMA3C, ZEB2	1363	33	14219	2.84513	1	0.163811	18.1855		*		1
GOTERM_BP_ALL	GO:0006140~regulation of nucleotide metabolic process	15	0.775595	0.0109925	CALCR, GUCA1A, ADCY1, ADCY2, ADORA2B, PTGER4, ADCY7, PTH1R, ADCY6, EDN1, TIMP2, FLNA, CHRM4, GPR44, GRM6	1363	75	14219	2.08643	1	0.163825	18.2658		*		0
GOTERM_BP_ALL	GO:0001503~ossification	19	0.98242	0.0115681	FGFR2, BMP4, FGF18, BMP1, PDLIM7, PTGS2, PTH1R, HSPG2, MMP14, MMP2, SMO, TNFSF11, BCL2, PTN, SORT1, RPS27A, BMP8B, BMP6, BMP8A	1363	106	14219	1.86991	1	0.170924	19.1295		*		1
GOTERM_BP_ALL	GO:0007229~integrin-mediated signaling pathway	15	0.775595	0.0123219	VAV3, ADAMTS19, ADAMTS14, BCAR1, ITGA3, ITGB3, ITGB1, ITGA9, ITGA6, ITGA5, ITGB8, ITGA7, GRLF1, ADAM8, CIB2	1363	76	14219	2.05897	1	0.180275	20.2475		*		0
GOTERM_BP_ALL	GO:0030001~metal ion transport	58	2.99897	0.0123513	STEAP3, SLC5A5, SLC9A7, TRPV2, KCNJ10, KCNIP3, SLC23A1, KCNK6, SLC24A1, CHRNA7, KCNG3, SLC4A4, KCNG1, NIPAL4, KCND1, ATP4A, CACNG7, STIM2, KCTD21, CACNG4, PRKCB, LCK, KCNH6, KCTD12B, SLC40A1, STEAP1, KCNMB4, SLC39A14, SLC38A3, SLC38A2, CYSLTR1, SLC39A10, CACNB2, KCNJ3, ANXA6, SLC5A4B, SLC39A8, SCN9A, CAMK2A, TRPC1, SLC8A2, SLC12A4, ATP1A3, KCNK1, CACNA1S, KCNK2, SLC10A1, ACCN2, KCTD8, SLC17A7, KC…	1363	442	14219	1.36892	1	0.179896	20.2908		*		0
GOTERM_BP_ALL	GO:0016310~phosphorylation	88	4.55016	0.0123982	NUAK2, NUAK1, CCNT1, CAD, C230081A13RIK, TGFB1, LATS2, D8ERTD82E, PAK6, CCNE1, PAK3, CDK12, TGFA, MLKL, CDK14, EGFR, RET, SGK2, MTAP2, PRKCH, RPS6KC1, CDK6, PKDCC, PRKCE, CDKL2, DAPK3, STK4, CDKL5, DAPK1, PRKCB, HUNK, DDR1, PLCE1, STYK1, ACVR2B, CDKL1, MAPK3, LCK, HIPK2, CFL1, ROR1, BMP2K, NRK, NEK4, MAP3K14, LRRK1, FGFR2, FGFR3, ERBB3, STK10, BMPR2, ABI2, BRSK1, MAPKAPK2, CD74, TRIB1, EPHB2, CAM…	1363	718	14219	1.27859	1	0.17975	20.3598		*		0
GOTERM_BP_ALL	GO:0035108~limb morphogenesis	20	1.03413	0.0128304	FGFR2, BMP4, RARG, C2CD3, TBX4, GNA12, CRABP2, EN1, PRRX2, MECOM, GLI3, MSX2, SALL4, CHD7, ZFP697, LRP6, PBX1, WNT9A, WNT7A, TWIST1	1363	115	14219	1.81428	1	0.184653	20.9935		CHD7		1
GOTERM_BP_ALL	GO:0035107~appendage morphogenesis	20	1.03413	0.0128304	FGFR2, BMP4, RARG, C2CD3, TBX4, GNA12, CRABP2, EN1, PRRX2, MECOM, GLI3, MSX2, SALL4, CHD7, ZFP697, LRP6, PBX1, WNT9A, WNT7A, TWIST1	1363	115	14219	1.81428	1	0.184653	20.9935		CHD7		1
GOTERM_BP_ALL	GO:0003002~regionalization	32	1.6546	0.0128968	EDN1, BMPR2, PAX6, ZEB2, GLI3, ZIC3, SUFU, GLI1, GBX2, NKX3-1, HHIP, LFNG, BMP4, TRP53, MDFI, ARC, EGR2, RARG, OTX2, DLL3, EN1, CELSR2, SMO, ACVR2B, SFRP2, HIPK2, LRP6, GDF11, NEUROD1, PBX1, WNT7A, TCF15	1363	214	14219	1.55995	1	0.184741	21.0904		*		1
GOTERM_BP_ALL	GO:0031279~regulation of cyclase activity	13	0.672182	0.013499	CALCR, GUCA1A, ADCY1, ADCY2, PTGER4, ADCY7, ADORA2B, PTH1R, ADCY6, FLNA, CHRM4, GPR44, GRM6	1363	62	14219	2.18738	1	0.191733	21.9643		*		0
GOTERM_BP_ALL	GO:0051339~regulation of lyase activity	13	0.672182	0.013499	CALCR, GUCA1A, ADCY1, ADCY2, PTGER4, ADCY7, ADORA2B, PTH1R, ADCY6, FLNA, CHRM4, GPR44, GRM6	1363	62	14219	2.18738	1	0.191733	21.9643		*		0
[truncated: 209 more rows]

## Sheet: NIA bank
All NIA bank TFs
T
Pou5f1 (Oct4)
Sox2
Whsc2
Control
Cdx2
Tuba1a
Nr0b1
Sall4
Msc
Mybl2
Nr5a2
Klf4
[truncated: 41 more rows]

## Sheet: Interactions
	CODEX								NIAbank
[truncated: 15 more rows]

[truncated: 1 more sheets: Chiron Vs. XAV,Zhang et al 2013]
